# Supplementary material
Source: MDPI journal article supplement (https://www.mdpi.com/2073-4395/12/3/749)
Supplement: s1 [file s1 › Table S1-5.xlsx]

## Sheet: Table S1
Table S1 Primers for qRT-PCR in this study
Gene ID	Gene description	Forward (5' →3')	Reverse (5' →3')
HORVU1Hr1G002840	Actin (a housekeeping gene)	GCCGTGCTTTCCCTCTATG	GCTTCTCCTTGATGTCCCTTA
HORVU7Hr1G117170	bZIP transcription factor 58	CGCAAGTACCGGGAGAAGAA	GATCTCCCCTTCGATCCTGC
HORVU6Hr1G053710	NAR2.3	AACGTGAAGGTGAGCCTCTG	TGAACTGGCAGGTCTTGTCC
HORVU0Hr1G000630	Transcription factor	GGACAATAATGCGCCTCCTG	AGCAAGTCACCTCTGGCAAA
HORVU1Hr1G087800	Alpha-hordothionin	CTACAAGACAGCCAACCAGC	ATAGCTTCTGAGCACCACGG
HORVU5Hr1G048700	Prolamine box binding factor	TTCAAAGCAGCCTCTCCCTG	ATCAAGAAGCCCTCCTGCAC
HORVU3Hr1G081000	WRKY transcript factor 49, partial	GTACCAGTGGAGGAAGTACGG	GATAAGATAAGCAACAGAGACGCC
HORVU4Hr1G013210	Peamaclein-like	CTGCTCCTCGCCTTGCTC	CACAGCCCGCAGTACTTGA
HORVU1Hr1G053510	Scarecrow-like protein 6	GGAGGAGGTTGGTGCTGC	AATGATCCAGCGGAGGAAGG
HORVU3Hr1G057840	Zinc finger protein ZPR1-like	GAAGAGAAGAGACCGCGAGA	GAGACTCGATTTCGTGAAGCG
HORVU3Hr1G100350	Xylanase inhibitor	TCCACATCCGCAAATAACTCCA	TGGACAGAAATGGACGGAGA
HORVU2Hr1G020920	UPF0481 protein At3g47200-like	CCTCGTTCTGGACCATCAGA	GAGACTTTGGTGCAAGACGC
HORVU7Hr1G099250	VIN3-like protein 2	AAACTGGAGGGTGAGCTTGG	AACTCTGGCTTTGCGACTCA

## Sheet: Table S2
Table S2 Evaluation results of sample-sequencing data
Sample	Raw data reads	Valid data	Valid Ratio (%)	Q20（%）	Q30（%）	GC content（%）
		Reads
G1	38003986	37340908	98.26	99.98	98.18	52
G2	39751662	38783272	97.56	99.97	98.18	52
G3	36444518	35719438	98.01	99.98	98.17	51
G4	49225478	48227180	97.97	99.98	98.48	50
G5	51708756	50688210	98.03	99.98	98.55	49.5
G6	36493828	35737716	97.93	99.98	98.1	50
G7	39493028	38669536	97.91	99.98	98.01	50
G8	39958082	39144850	97.96	99.97	98.11	51
G9	54065072	52664824	97.41	99.95	98.27	51
G10	54191748	52691952	97.23	99.98	98.21	50.5
G11	55027148	53790454	97.75	99.98	98.25	50
G12	41339206	40526682	98.03	99.98	98.19	50
Z1	51876438	50658152	97.65	99.98	98.27	52
Z2	37975170	37276588	98.16	99.98	98.09	51.5
Z3	51921352	50441132	97.15	99.96	98.16	52
Z4	48795484	47569262	97.49	99.97	98.01	50
Z5	39909950	39064674	97.88	99.97	97.99	50
Z6	50973516	49826418	97.75	99.97	98.05	50.5
Z7	49981994	49043286	98.12	99.98	97.98	50.5
Z8	46584632	45783218	98.28	99.99	98.02	45
Z9	54188498	52592138	97.05	99.97	97.98	51
Z10	51792424	50675124	97.84	99.98	98.18	50.5
Z11	54690002	53357478	97.56	99.96	98.15	52
Z12	49287928	48321300	98.04	99.98	98.15	52

## Sheet: Table S3
Table S3 Selected genes with contrasting expression level in GP and ZU9
Gene ID	Description	G5	p-value	G10	p-value	G20	p-value	Z5	p-value	Z10	p-value	Z20	p-value	KEGG	GO
HORVU1Hr1G001960	12-oxophytodienoic acid reductase	13.9609	3.00284e-10	16.0685	7.9938e-20	15.073	3.26564e-19	0	1	0	1	8.17389	1	00592(alpha-Linolenic acid metabolism);00592(alpha-Linolenic acid metabolism)	GO:0003824(catalytic activity);GO:0010181(FMN binding);GO:0016491(oxidoreductase activity);GO:0055114(oxidation-reduction process);GO:0055114(oxidation-reduction process)
HORVU2Hr1G046370	18.8 kDa class V heat shock protein	5.03719	2.35539e-20	4.39515	2.34058e-14	2.58877	8.77069e-05	3.65811	6.76644e-21	1.93108	0.00271648	1.36082	0.00827175	04141(Protein processing in endoplasmic reticulum);04141(Protein processing in endoplasmic reticulum)	GO:0009408(response to heat);GO:0009408(response to heat)
HORVU2Hr1G004790	7-deoxyloganetin glucosyltransferase-like	3.20052	1.58423e-06	5.02219	4.20785e-15	5.75705	1.21405e-28	-7.37822	1	0.0149131	1	1.62477	1	NA	GO:0016740(transferase activity);GO:0016758(transferase activity, transferring hexosyl groups);GO:0016758(transferase activity, transferring hexosyl groups)
HORVU5Hr1G072540	AAA domain-containing protein	1.50365	0.000835287	1.91619	4.49154e-05	3.03332	2.07019e-11	0.816417	0.107312	0.685118	0.209503	1.20886	0.0027495	04626(Plant-pathogen interaction);04626(Plant-pathogen interaction)	GO:0043531(ADP binding);GO:0043531(ADP binding)
HORVU7Hr1G119300	AAA domain-containing protein	12.9784	3.73333e-12	14.5817	2.56571e-14	15.3578	1.35308e-22	1.73368	0.0185742	2.6537	0.000196127	2.18055	0.000687175	03050(Proteasome);03050(Proteasome)	GO:0000166(nucleotide binding);GO:0005524(ATP binding);GO:0005737(cytoplasm);GO:0016787(hydrolase activity);GO:0030163(protein catabolic process);GO:0036402(proteasome-activating ATPase activity);GO:0036402(proteasome-activating ATPase activity)
HORVU3Hr1G098290	AB hydrolase-1 domain-containing protein	3.86501	0.00102323	4.69241	8.36247e-07	3.81327	3.64255e-05	0.287686	0.966729	-0.168372	0.829563	0.136466	0.686469	00460(Cyanoamino acid metabolism);00630(Glyoxylate and dicarboxylate metabolism);04146(Peroxisome);04146(Peroxisome)	NA
HORVU3Hr1G068650	ABC transmembrane type-1 domain-containing protein	-1.50512	0.00251221	-1.90402	0.00156304	-2.30976	0.000227797	0.631422	0.406599	0.97673	0.136058	-0.829393	0.315726	02010(ABC transporters);02010(ABC transporters)	GO:0000166(nucleotide binding);GO:0005524(ATP binding);GO:0016020(membrane);GO:0016021(integral component of membrane);GO:0016887(ATPase activity);GO:0042626(ATPase activity, coupled to transmembrane movement of substances);GO:0055085(transmembrane transport);GO:0099131(ATP hydrolysis coupled ion transmembrane transport);GO:0099131(ATP hydrolysis coupled ion transmembrane transport)
HORVU5Hr1G096000	ABC transporter	4.25713	1.1051e-06	4.07178	0.000434799	3.31765	0.000945212	2.97705	0.0029605	1.39274	1	1.1747	1	02010(ABC transporters);02010(ABC transporters)	GO:0000166(nucleotide binding);GO:0005524(ATP binding);GO:0016020(membrane);GO:0016021(integral component of membrane);GO:0016887(ATPase activity);GO:0042626(ATPase activity, coupled to transmembrane movement of substances);GO:0055085(transmembrane transport);GO:0099131(ATP hydrolysis coupled ion transmembrane transport);GO:0099131(ATP hydrolysis coupled ion transmembrane transport)
HORVU7Hr1G085680	ABC transporter A family member 8-like isoform X2	2.40446	0.00204548	6.76152	2.52965e-21	6.47899	1.57073e-31	0.354061	0.898254	1.31919	0.053261	1.96241	0.000498245	02010(ABC transporters);02010(ABC transporters)	GO:0000166(nucleotide binding);GO:0005524(ATP binding);GO:0016020(membrane);GO:0016021(integral component of membrane);GO:0016887(ATPase activity);GO:0042626(ATPase activity, coupled to transmembrane movement of substances);GO:0055085(transmembrane transport);GO:0099131(ATP hydrolysis coupled ion transmembrane transport);GO:0099131(ATP hydrolysis coupled ion transmembrane transport)
HORVU5Hr1G063820	Aldehyde oxygenase	7.57722	6.16863e-14	9.00627	5.25414e-17	9.24268	6.2222e-30	2.71373	0.0271688	4.54252	0.000121386	5.78348	7.00355e-08	00073(Cutin, suberine and wax biosynthesis);00073(Cutin, suberine and wax biosynthesis)	GO:0005506(iron ion binding);GO:0008610(lipid biosynthetic process);GO:0009409(response to cold);GO:0009414(response to water deprivation);GO:0009651(response to salt stress);GO:0016020(membrane);GO:0016021(integral component of membrane);GO:0016491(oxidoreductase activity);GO:0055114(oxidation-reduction process);GO:0055114(oxidation-reduction process)
HORVU3Hr1G084590	Alkyl transferase	3.74323	6.95651e-05	4.45541	8.70682e-06	3.95083	8.61403e-06	0.157915	1	0.686302	1	-0.947758	1	00900(Terpenoid backbone biosynthesis);00900(Terpenoid backbone biosynthesis)	GO:0016740(transferase activity);GO:0016765(transferase activity, transferring alkyl or aryl (other than methyl) groups);GO:0016765(transferase activity, transferring alkyl or aryl (other than methyl) groups)
HORVU4Hr1G067510	Aluminum activated citrate transporter transporter	13.0654	6.96883e-11	12.0772	4.78666e-07	12.4184	2.30713e-11	5.77524	2.81581e-09	5.73147	1	4.24282	1.73236e-05	NA	GO:0006855(drug transmembrane transport);GO:0015238(drug transmembrane transporter activity);GO:0015297(antiporter activity);GO:0015746(citrate transport);GO:0016020(membrane);GO:0016021(integral component of membrane);GO:0042908(xenobiotic transport);GO:0042910(xenobiotic transmembrane transporter activity);GO:0055085(transmembrane transport);GO:0055085(transmembrane transport)
HORVU7Hr1G079430	Aminopropyl transferase	-1.52677	1.89345e-07	-1.24108	0.00280986	-1.4392	0.00122068	-0.704529	0.00158853	-0.236107	0.360582	-1.00712	0.0968207	00270(Cysteine and methionine metabolism);00330(Arginine and proline metabolism);00410(beta-Alanine metabolism);00480(Glutathione metabolism);00480(Glutathione metabolism)	GO:0003824(catalytic activity);GO:0006595(polyamine metabolic process);GO:0006596(polyamine biosynthetic process);GO:0016020(membrane);GO:0016021(integral component of membrane);GO:0016740(transferase activity);GO:0016740(transferase activity)
HORVU3Hr1G023740	ANK_REP_REGION domain-containing protein	3.21352	1.76349e-22	2.32166	2.73384e-08	2.09692	6.59524e-08	1.45724	0.000170289	0.170573	0.96467	-1.03337	0.0661213	NA	GO:0005515(protein binding);GO:0005515(protein binding)
HORVU3Hr1G030310	AP2/ERF domain-containing protein	1.52541	0.00145194	3.03523	8.51769e-10	1.66776	0.00048914	0.703904	0.241942	1.84842	8.99992e-05	0.572124	0.125907	04626(Plant-pathogen interaction)	GO:0003677(DNA binding);GO:0003700(DNA-binding transcription factor activity);GO:0005634(nucleus);GO:0006351(transcription, DNA-templated);GO:0006355(regulation of transcription, DNA-templated)
HORVU3Hr1G088810	Auxin responsive protein	4.00499	5.47956e-08	2.8531	0.000809489	3.57579	2.71134e-06	0.757611	0.207622	0.196728	0.886388	-1.11891	0.364365	04075(Plant hormone signal transduction);04075(Plant hormone signal transduction)	GO:0005515(protein binding);GO:0005634(nucleus);GO:0006351(transcription, DNA-templated);GO:0006355(regulation of transcription, DNA-templated);GO:0009734(auxin-activated signaling pathway);GO:0009734(auxin-activated signaling pathway)
HORVU0Hr1G007730	B3 domain-containing protein LOC_Os12g40080	-12.7714	4.8918e-12	-12.7714	5.43454e-09	-12.7714	1.50109e-10	0	1	0	1	0	1	NA	GO:0003677(DNA binding);GO:0005634(nucleus);GO:0006351(transcription, DNA-templated);GO:0006355(regulation of transcription, DNA-templated)
HORVU4Hr1G087590	bHLH domain-containing protein	-2.17703	0.000328291	-4.05993	5.25346e-05	-6.14685	7.07399e-08	-0.380754	1	0.873123	0.331775	1.57735	0.0349897	NA	GO:0046983(protein dimerization activity);GO:0046983(protein dimerization activity)
HORVU3Hr1G023560	Boron transporter	12.0954	9.11255e-10	11.6834	8.2139e-05	13.0086	1.94695e-11	-1.28189	0.0104091	-0.646073	0.224765	-1.04392	0.258105	NA	GO:0005452(inorganic anion exchanger activity);GO:0006820(anion transport);GO:0015698(inorganic anion transport);GO:0016020(membrane);GO:0016021(integral component of membrane);GO:0016021(integral component of membrane)
HORVU1Hr1G007480	BOWMAN_BIRK domain-containing protein	3.93854	4.41476e-19	3.14503	7.764e-08	2.63101	3.41367e-06	2.02064	0.00215378	0.535793	0.58095	-0.576254	0.720812	NA	GO:0004867(serine-type endopeptidase inhibitor activity);GO:0005576(extracellular region);GO:0010466(negative regulation of peptidase activity);GO:0010951(negative regulation of endopeptidase activity);GO:0030414(peptidase inhibitor activity)
HORVU4Hr1G013420	BTB/POZ domain-containing protein NPY4-like	1.69788	2.10564e-07	1.24033	0.00241765	1.19906	0.000564067	1.18817	0.000208358	0.905515	0.0246639	-0.0255872	0.589533	03050(Proteasome);03050(Proteasome)	NA
HORVU6Hr1G032560	C2 and GRAM domain-containing protein At1g03370-like	8.48418	3.45e-41	8.46346	5.78691e-33	7.50695	1.53811e-25	2.37514	0.0558127	1.8908	0.116468	0.545283	0.58848	04144(Endocytosis);04144(Endocytosis)	GO:0016020(membrane);GO:0016021(integral component of membrane);GO:0016021(integral component of membrane)
HORVU5Hr1G046880	CBL-interacting protein kinase 14	3.08343	4.41802e-11	4.36227	8.46238e-15	4.9424	3.31419e-18	-0.65102	0.00472094	2.39183	1.65952e-07	2.32081	3.91404e-06	NA	GO:0000166(nucleotide binding);GO:0004672(protein kinase activity);GO:0004674(protein serine/threonine kinase activity);GO:0005524(ATP binding);GO:0006468(protein phosphorylation);GO:0007165(signal transduction);GO:0016301(kinase activity);GO:0016310(phosphorylation);GO:0016740(transferase activity)
HORVU5Hr1G046830	CBL-interacting protein kinase 14	2.59758	8.31499e-19	3.8327	2.09704e-19	4.38663	5.93607e-24	-0.706812	0.00667718	2.19202	9.09997e-06	2.07438	5.28809e-05	NA	GO:0000166(nucleotide binding);GO:0004672(protein kinase activity);GO:0004674(protein serine/threonine kinase activity);GO:0005524(ATP binding);GO:0006468(protein phosphorylation);GO:0007165(signal transduction);GO:0016301(kinase activity);GO:0016310(phosphorylation);GO:0016740(transferase activity);GO:0016740(transferase activity)
HORVU7Hr1G089510	CBL-interacting protein kinase 25-like	-1.42331	1.35599e-08	-1.04404	0.00194157	-1.19158	0.00177025	-0.114393	0.104482	-0.50488	0.123418	-0.81449	0.10426	NA	GO:0000166(nucleotide binding);GO:0004672(protein kinase activity);GO:0004674(protein serine/threonine kinase activity);GO:0005524(ATP binding);GO:0006468(protein phosphorylation);GO:0007165(signal transduction);GO:0016301(kinase activity);GO:0016310(phosphorylation);GO:0016740(transferase activity);GO:0016740(transferase activity)
HORVU7Hr1G088030	Cell division cycle and apoptosis regulator protein 1-like isoform X1	2.77549	2.29067e-05	3.1909	1.40365e-05	4.24239	3.96122e-11	-0.827042	0.0805809	0.611886	0.525598	1.56882	0.0320523	NA	NA
HORVU6Hr1G077430	Chaperone protein DnaJ 1	-1.1096	7.65286e-06	-1.41041	0.000215959	-1.9601	1.14981e-06	-0.12127	0.200926	-1.01721	0.00850287	-0.0636404	0.744359	NA	NA
HORVU2Hr1G126720	Chitin-binding type-1 domain-containing protein	-14.2657	4.53546e-19	-14.2657	9.27597e-14	-14.2657	4.89805e-16	0	1	0	1	0	1	00520(Amino sugar and nucleotide sugar metabolism);04016(MAPK signaling pathway - plant)	GO:0008061(chitin binding)
HORVU3Hr1G080830	Cinnamate-4-hydroxylase	-1.41779	6.49494e-06	-1.37441	7.24563e-05	-3.14416	4.1067e-08	-0.273219	0.0822967	0.305943	0.673565	0.283117	0.327206	00360(Phenylalanine metabolism);00130(Ubiquinone and other terpenoid-quinone biosynthesis);00940(Phenylpropanoid biosynthesis);00945(Stilbenoid, diarylheptanoid and gingerol biosynthesis);00941(Flavonoid biosynthesis);00941(Flavonoid biosynthesis)	GO:0004497(monooxygenase activity);GO:0005506(iron ion binding);GO:0005774(vacuolar membrane);GO:0005783(endoplasmic reticulum);GO:0005794(Golgi apparatus);GO:0005886(plasma membrane);GO:0006744(ubiquinone biosynthetic process);GO:0009505(plant-type cell wall);GO:0009506(plasmodesma);GO:0009555(pollen development);GO:0009808(lignin metabolic process);GO:0016491(oxidoreductase activity);GO:0016705…
HORVU3Hr1G087480	ClpS domain-containing protein	-13.7368	8.58833e-15	-3.58681	0.000127623	-3.59412	1.9441e-05	-3.00712	3.47166e-08	-4.6401	2.19189e-08	1.26011	0.0165542	NA	GO:0030163(protein catabolic process);GO:0030163(protein catabolic process)
HORVU3Hr1G071800	Conserved hypothetical protein	4.07289	3.58673e-12	2.87203	8.05351e-05	2.47792	2.57987e-05	0.0683853	0.675149	-1.29148	0.0191011	0.735698	0.128968	NA	NA
HORVU1Hr1G024460	DCD domain-containing protein	1.67733	1.36547e-05	2.80751	1.95334e-11	3.90218	5.18217e-28	-0.160813	0.162707	1.08832	0.0121332	1.03049	0.0062107	NA	GO:0005515(protein binding);GO:0005515(protein binding)
HORVU7Hr1G111810	DEAD-box ATP-dependent RNA helicase 28	4.20994	1.33205e-05	3.97518	0.000293046	3.71953	0.000511725	0.884167	0.199125	0.788264	0.33691	-1.62461	0.0479966	NA	NA
HORVU6Hr1G064620	Dehydrin 8	-1.85309	1.4199e-05	-2.57049	1.53401e-05	-1.57531	0.00327755	0.483653	0.672129	-0.265118	0.260298	0.851575	0.0943123	NA	GO:0009415(response to water);GO:0009415(response to water)
HORVU1Hr1G005180	Disease resistance protein RGA3	6.08599	5.47937e-08	8.48125	2.98156e-14	8.12805	8.36127e-15	1.25575	0.018979	1.31209	0.0305438	0.258461	0.362642	NA	GO:0043531(ADP binding);GO:0043531(ADP binding)
HORVU1Hr1G002850	Disease resistance protein RPM1	3.38754	2.35814e-12	3.4271	1.4989e-10	4.4553	2.94809e-19	0.763916	1	1.61013	1	0.847525	1	04626(Plant-pathogen interaction);04626(Plant-pathogen interaction)	GO:0043531(ADP binding);GO:0043531(ADP binding)
HORVU1Hr1G002930	Disease resistance protein RPP13-like	2.84621	0.00110927	3.48696	0.000254701	5.84295	6.37287e-24	-0.784716	1	-0.0544188	1	-0.462645	1	04626(Plant-pathogen interaction)	NA
HORVU1Hr1G057510	DNA-directed RNA polymerases I and III subunit rpac1	1.16563	0.00210006	1.75793	3.6158e-06	1.10174	0.00128231	0.891258	0.0224067	1.45268	0.000220673	0.518516	0.0539906	00230(Purine metabolism);00240(Pyrimidine metabolism);03020(RNA polymerase);03020(RNA polymerase)	GO:0003677(DNA binding);GO:0003899(DNA-directed 5'-3' RNA polymerase activity);GO:0006351(transcription, DNA-templated);GO:0016020(membrane);GO:0016021(integral component of membrane);GO:0046983(protein dimerization activity);GO:0046983(protein dimerization activity)
HORVU5Hr1G097620	Dof zinc finger protein 15	2.54728	7.08336e-06	3.17745	1.42824e-07	2.76098	8.5149e-05	2.07076	0.000155649	0.932602	0.24733	-0.442656	0.762993	NA	GO:0003677(DNA binding);GO:0005634(nucleus);GO:0006355(regulation of transcription, DNA-templated)
HORVU7Hr1G055100	DUF4210 domain-containing protein	-1.12253	2.3171e-05	-1.18378	0.000639414	-1.18405	0.0032462	-0.207399	0.109063	-0.29043	0.211813	0.214473	0.271014	NA	NA
HORVU5Hr1G117790	DUF4220 domain-containing protein	3.50634	1.20242e-08	3.9328	4.05835e-08	5.07134	2.53512e-13	-0.436261	1	-6.69801	1	-0.207368	1	03013(RNA transport);00040(Pentose and glucuronate interconversions);00040(Pentose and glucuronate interconversions)	GO:0016020(membrane);GO:0016021(integral component of membrane);GO:0016021(integral component of membrane)
HORVU3Hr1G073190	Dynein light chain LC6, flagellar outer arm	3.90714	1.36321e-12	3.48465	8.77777e-07	2.67902	4.72738e-06	-1.81287	0.00188159	-1.99031	0.00410285	0.0628662	0.637455	NA	GO:0003774(motor activity);GO:0005737(cytoplasm);GO:0005856(cytoskeleton);GO:0005874(microtubule);GO:0007017(microtubule-based process);GO:0030286(dynein complex);GO:0030286(dynein complex)
HORVU6Hr1G080320	E3 ubiquitin-protein ligase RING1-like	3.15694	0.00104355	3.01908	0.00132814	4.62185	7.65033e-11	0.375036	0.89491	1.17735	0.205025	2.0127	0.0019928	NA	GO:0016020(membrane);GO:0016021(integral component of membrane);GO:0016567(protein ubiquitination);GO:0061630(ubiquitin protein ligase activity);GO:0061630(ubiquitin protein ligase activity)
HORVU5Hr1G098600	Eukaryotic translation initiation factor 3 subunit C	1.35033	4.28323e-05	2.01827	4.20369e-07	1.85845	2.17061e-08	0.892133	0.0158038	1.99949	9.07939e-09	0.887051	0.00191142	03013(RNA transport);03013(RNA transport)	GO:0001732(formation of cytoplasmic translation initiation complex);GO:0002183(cytoplasmic translational initiation);GO:0003723(RNA binding);GO:0003743(translation initiation factor activity);GO:0005737(cytoplasm);GO:0005852(eukaryotic translation initiation factor 3 complex);GO:0006412(translation);GO:0006413(translational initiation);GO:0016282(eukaryotic 43S preinitiation complex);GO:0031369(t…
HORVU3Hr1G032260	Expansin	13.2204	5.87654e-12	13.3982	1.67189e-09	16.1768	5.441e-30	6.48011	1	7.83315	5.84089e-11	10.6838	4.15485e-24	NA	GO:0005576(extracellular region);GO:0005618(cell wall);GO:0009664(plant-type cell wall organization);GO:0016020(membrane);GO:0016021(integral component of membrane);GO:0071555(cell wall organization);GO:0071555(cell wall organization)
HORVU4Hr1G081800	Expansin-like CBD domain-containing protein	3.52561	6.96083e-05	3.24403	0.000789048	3.67936	1.50061e-05	1.40894	0.152894	1.29504	0.186897	1.4012	0.0612551	NA	GO:0005576(extracellular region);GO:0005576(extracellular region)
HORVU3Hr1G020300	Facilitates chromatin transcription（FACT） complex subunit SSRP1	2.13317	5.71962e-08	1.63871	0.000911244	2.93699	1.0001e-15	-0.0805284	0.249573	-0.286035	0.29599	-0.0689305	0.742122	NA	GO:0003677(DNA binding);GO:0005634(nucleus);GO:0005694(chromosome);GO:0006260(DNA replication);GO:0006281(DNA repair);GO:0006974(cellular response to DNA damage stimulus);GO:0016020(membrane);GO:0016021(integral component of membrane);GO:0016021(integral component of membrane)
HORVU4Hr1G022020	Factor of DNA methylation 1-like	1.97775	4.46596e-07	2.01125	1.6696e-06	2.25283	1.00116e-09	0.588707	0.286389	0.407237	0.501041	-0.556175	0.471378	NA	GO:0031047(gene silencing by RNA);GO:0031047(gene silencing by RNA)
HORVU5Hr1G012170	FBD-associated F-box protein At5g56700	5.01101	2.43858e-05	6.3782	2.93161e-07	8.46894	9.46501e-18	2.55872	1	3.75618	1	0.861592	1	NA	GO:0005515(protein binding);GO:0005515(protein binding)
HORVU3Hr1G078960	F-box domain-containing protein	2.06904	6.45922e-06	2.16038	1.90148e-05	1.38714	0.00292616	0.926762	0.139279	0.693914	0.285734	0.986846	0.0193953	00650(Butanoate metabolism);00072(Synthesis and degradation of ketone bodies);00280(Valine, leucine and isoleucine degradation);04146(Peroxisome);04146(Peroxisome)	GO:0005515(protein binding);GO:0005515(protein binding)
HORVU3Hr1G014530	F-box domain-containing protein	3.06051	0.000186216	3.74538	1.03051e-05	4.09404	1.88962e-08	1.22498	0.175872	2.33279	0.00434338	2.07653	0.00584072	NA	GO:0005515(protein binding);GO:0016020(membrane);GO:0016021(integral component of membrane);GO:0016021(integral component of membrane)
HORVU1Hr1G061780	Fe2OG dioxygenase domain-containing protein	-1.30862	1.02008e-07	-1.50603	1.89614e-05	-2.40594	2.856e-10	0.225369	0.846011	0.0486814	0.764692	-0.956656	0.0775973	NA	GO:0016491(oxidoreductase activity);GO:0046872(metal ion binding);GO:0055114(oxidation-reduction process);GO:0055114(oxidation-reduction process)
HORVU6Hr1G080360	Fe2OG dioxygenase domain-containing protein	-3.94258	6.04462e-26	-2.41344	2.06179e-07	-2.43278	2.05936e-09	-0.68869	0.0259578	-0.984532	0.0707001	0.347747	0.267125	00941(Flavonoid biosynthesis);00941(Flavonoid biosynthesis)	GO:0016491(oxidoreductase activity);GO:0046872(metal ion binding);GO:0055114(oxidation-reduction process);GO:0055114(oxidation-reduction process)
HORVU3Hr1G091210	Fe2OG dioxygenase domain-containing protein	-3.11159	8.71743e-13	-2.75921	3.17735e-08	-2.64442	4.68689e-07	-0.244626	0.216196	-0.532664	0.273273	0.185062	0.502336	00941(Flavonoid biosynthesis);00940(Phenylpropanoid biosynthesis);00940(Phenylpropanoid biosynthesis)	GO:0016491(oxidoreductase activity);GO:0046872(metal ion binding);GO:0055114(oxidation-reduction process);GO:0055114(oxidation-reduction process)
HORVU6Hr1G088540	Fe2OG dioxygenase domain-containing protein	-5.27644	6.26767e-08	-6.43888	1.9405e-07	-5.90958	2.47416e-07	9.38264	1	9.26559	1	10.2823	1	00941(Flavonoid biosynthesis);00941(Flavonoid biosynthesis)	GO:0016491(oxidoreductase activity);GO:0046872(metal ion binding);GO:0055114(oxidation-reduction process);GO:0055114(oxidation-reduction process)
HORVU6Hr1G020380	GHMP_kinases_C domain-containing protein	2.81795	5.53368e-20	2.89309	7.33474e-11	2.65161	4.5688e-15	1.09925	0.00195475	1.38775	0.00109022	0.700504	0.00558037	00520(Amino sugar and nucleotide sugar metabolism);00520(Amino sugar and nucleotide sugar metabolism)	GO:0004335(galactokinase activity);GO:0005524(ATP binding);GO:0005534(galactose binding);GO:0006012(galactose metabolic process);GO:0046835(carbohydrate phosphorylation);GO:0046835(carbohydrate phosphorylation)
HORVU4Hr1G056770	Glucuronyltransferase 43	-1.43146	0.000125571	-2.98549	1.08441e-06	-3.34418	9.74859e-09	1.24614	0.035663	-0.131212	0.627334	-0.63133	0.511963	NA	GO:0000139(Golgi membrane);GO:0005794(Golgi apparatus);GO:0015018(galactosylgalactosylxylosylprotein 3-beta-glucuronosyltransferase activity);GO:0016020(membrane);GO:0016740(transferase activity);GO:0071555(cell wall organization);GO:0071555(cell wall organization)
HORVU3Hr1G013650	Glutathione hydrolase 3	12.0102	2.88635e-12	13.1246	1.06973e-14	14.3759	3.02542e-28	3.89137	1	5.34178	1.55204e-06	7.40429	8.91001e-20	00590(Arachidonic acid metabolism);00430(Taurine and hypotaurine metabolism);00460(Cyanoamino acid metabolism);00480(Glutathione metabolism);00480(Glutathione metabolism)	GO:0006508(proteolysis);GO:0006751(glutathione catabolic process);GO:0016020(membrane);GO:0016021(integral component of membrane);GO:0036374(glutathione hydrolase activity);GO:0036374(glutathione hydrolase activity)
HORVU6Hr1G063830	Glutathione peroxidase	-1.29684	4.95385e-08	-1.35334	0.000115054	-1.53282	0.000119018	-0.125271	0.100615	-0.859298	0.0011511	-0.757831	0.123122	00590(Arachidonic acid metabolism);00480(Glutathione metabolism);00480(Glutathione metabolism)	GO:0004601(peroxidase activity);GO:0004602(glutathione peroxidase activity);GO:0006979(response to oxidative stress);GO:0016491(oxidoreductase activity);GO:0048831(regulation of shoot system development);GO:0055114(oxidation-reduction process);GO:0098869(cellular oxidant detoxification);GO:2000280(regulation of root development);GO:2000280(regulation of root development)
HORVU3Hr1G112610	Glutathione S-transferase GSTU6	7.15998	2.19224e-18	9.96161	2.40635e-24	10.3303	2.35914e-29	1.15945	1	3.67033	0.00018176	5.54992	8.41057e-13	00480(Glutathione metabolism)	GO:0005515(protein binding)
HORVU5Hr1G124630	Glutathione S-transferase theta-1	2.21593	7.25191e-13	3.23784	7.31612e-14	3.01551	7.68619e-19	0.747442	0.06176	1.20555	0.0021068	1.33032	6.57592e-06	00480(Glutathione metabolism);00480(Glutathione metabolism)	GO:0005515(protein binding);GO:0005515(protein binding)
HORVU5Hr1G118800	Glutathione transferase	6.92082	1.66228e-17	8.9684	5.96891e-25	8.89106	1.54924e-51	-0.945821	1	0.533898	1	-1.37915	1	00480(Glutathione metabolism);00480(Glutathione metabolism)	GO:0005515(protein binding);GO:0005515(protein binding)
HORVU4Hr1G085460	Glyco_hyd_65N_2 domain-containing protein	-2.01136	1.00663e-09	-2.57925	3.75733e-08	-3.62884	8.87796e-11	0.655095	0.466949	0.420846	0.643884	-0.787793	0.405549	00511(Other glycan degradation);00511(Other glycan degradation)	GO:0003824(catalytic activity);GO:0004560(alpha-L-fucosidase activity);GO:0004560(alpha-L-fucosidase activity)
HORVU1Hr1G077230	Glyco_trans_2-like domain-containing protein	-1.1901	2.82914e-07	-1.87276	4.48635e-07	-1.59637	8.54264e-05	0.292201	0.98107	-0.340002	0.298754	-0.459304	0.615079	NA	GO:0016020(membrane);GO:0016021(integral component of membrane);GO:0016021(integral component of membrane)
HORVU6Hr1G035370	Glycosyltransferase	-3.10707	8.48024e-19	-1.70123	5.50424e-05	-2.59793	2.0699e-09	-0.606765	0.267901	-0.228976	0.676765	-0.0428762	0.8055	NA	GO:0016740(transferase activity);GO:0016757(transferase activity, transferring glycosyl groups);GO:0016758(transferase activity, transferring hexosyl groups);GO:0016758(transferase activity, transferring hexosyl groups)
HORVU6Hr1G069940	Glycosyltransferase family 92 protein	-2.53576	5.80766e-21	-1.62104	3.23357e-05	-1.49137	0.000897882	-0.427212	0.00305696	-0.044913	0.677865	0.771967	0.00570903	NA	GO:0016020(membrane);GO:0016021(integral component of membrane);GO:0016021(integral component of membrane)
HORVU7Hr1G089700	Heme oxygenase 1	1.81403	6.41557e-08	1.3789	0.00107697	1.642	6.87147e-07	1.09727	0.00102209	0.750466	0.0798394	0.68165	0.00933246	00860(Porphyrin and chlorophyll metabolism);00860(Porphyrin and chlorophyll metabolism)	GO:0004392(heme oxygenase (decyclizing) activity);GO:0006788(heme oxidation);GO:0016491(oxidoreductase activity);GO:0055114(oxidation-reduction process);GO:0055114(oxidation-reduction process)
HORVU7Hr1G118970	Heme oxygenase 1, chloroplastic	-15.5444	1.17475e-23	-15.5444	1.91949e-16	-15.5444	3.75331e-19	0	1	0	1	0	1	00860(Porphyrin and chlorophyll metabolism)	GO:0004392(heme oxygenase (decyclizing) activity);GO:0006788(heme oxidation);GO:0055114(oxidation-reduction process)
ENSRNA050017729	Histone H3.3	2.97526	7.7714e-05	3.04708	0.000377573	2.35875	0.00150732	0.816331	0.392325	1.53467	0.0757426	-0.418282	1	NA	NA
HORVU3Hr1G080660	Homeobox domain-containing protein	-1.53677	1.07567e-08	-1.37262	7.93953e-05	-1.52876	0.000104102	-0.33426	0.0239108	-0.487642	0.167219	-0.987445	0.0508755	NA	GO:0003677(DNA binding);GO:0005634(nucleus);GO:0005634(nucleus)
HORVU5Hr1G058400	Homolog of copper chaperone/synthesis of cytochrome c oxidase	1.29658	0.00256786	1.6876	0.000106923	1.52537	3.46687e-05	0.622689	0.295753	1.32311	0.00270842	0.997111	0.00225928	NA	GO:0016020(membrane);GO:0016021(integral component of membrane);GO:0016021(integral component of membrane)
HORVU4Hr1G001680	HPt domain-containing protein	-15.7557	6.2143e-26	-15.7557	4.81065e-18	-4.03925	0.00336514	0	1	0	1	0	1	04075(Plant hormone signal transduction);04075(Plant hormone signal transduction)	GO:0000160(phosphorelay signal transduction system);GO:0005622(intracellular);GO:0005622(intracellular)
HORVU5Hr1G018220	HTH myb-type domain-containing protein	-3.00565	1.21044e-25	-1.99087	1.88391e-07	-1.40773	0.000249096	-0.725429	0.000163522	-0.888215	0.0160081	-0.955725	0.0600445	04933(AGE-RAGE signaling pathway in diabetic complications);04933(AGE-RAGE signaling pathway in diabetic complications)	GO:0003677(DNA binding);GO:0005634(nucleus);GO:0005634(nucleus)
HORVU7Hr1G115810	Hydrophob_seed domain-containing protein	-4.62779	3.11493e-29	-3.99213	2.23905e-07	-16.83	8.46801e-47	0.382348	1	-0.546214	1	-0.732889	1	NA	GO:0016020(membrane);GO:0016021(integral component of membrane)
HORVU3Hr1G099770	Hydroxyethylthiazole kinase-like	-1.40554	2.1664e-06	-1.35004	0.00176343	-2.17433	1.52028e-05	0.11022	0.636384	0.513374	0.458841	0.687494	0.0550932	00730(Thiamine metabolism);00730(Thiamine metabolism)	GO:0004417(hydroxyethylthiazole kinase activity);GO:0009228(thiamine biosynthetic process);GO:0016310(phosphorylation);GO:0036172(thiamine salvage);GO:0036172(thiamine salvage)
HORVU5Hr1G050140	Hypothetical protein TRIUR3_17864	-4.24396	1.13115e-17	-2.95391	8.32635e-08	-3.38452	5.12093e-08	-0.598416	0.0262681	-0.671958	0.0742368	1.03249	0.00776501	NA	NA
HORVU5Hr1G050120	Hypothetical protein TRIUR3_17864	-4.21376	7.3416e-17	-2.95386	1.10607e-07	-3.40689	1.17251e-07	-0.604546	0.0266002	-0.595107	0.105313	1.0343	0.00898261	NA	NA
HORVU7Hr1G114030	Hypothetical protein TRIUR3_31080	-2.43531	5.06202e-06	-1.62926	4.43396e-05	-2.27285	1.70616e-08	-0.0611089	0.389772	-0.748696	0.0433802	-0.607905	0.423043	NA	NA
HORVU6Hr1G061450	Liron-phytosiderophore transporter	12.7109	6.84711e-13	14.3346	4.68953e-13	13.8046	5.73861e-19	5.03198	1	7.58932	2.81431e-12	9.17171	4.48214e-20	NA	GO:0005886(plasma membrane);GO:0016020(membrane);GO:0016021(integral component of membrane);GO:0055085(transmembrane transport);GO:0055085(transmembrane transport)
HORVU1Hr1G060180	Importin subunit beta-1-like	1.66166	0.00114018	1.94501	1.58491e-05	1.85129	2.2781e-06	0.992436	0.0194141	1.56644	7.53882e-05	0.877984	0.00269211	03013(RNA transport);03013(RNA transport)	GO:0005634(nucleus);GO:0006606(protein import into nucleus);GO:0006886(intracellular protein transport);GO:0006913(nucleocytoplasmic transport);GO:0008536(Ran GTPase binding);GO:0008565(protein transporter activity);GO:0016020(membrane);GO:0016021(integral component of membrane);GO:0016021(integral component of membrane)
HORVU2Hr1G040130	Internal alternative NAD(P)H-ubiquinone oxidoreductase A1, mitochondrial-like	13.3844	8.22251e-13	12.7987	8.85188e-10	13.9635	1.34678e-16	4.44247	1	4.71595	1	7.16441	8.47375e-09	NA	GO:0016491(oxidoreductase activity);GO:0055114(oxidation-reduction process);GO:0055114(oxidation-reduction process)
HORVU6Hr1G014510	KH domain-containing protein	1.67502	0.000361028	2.24747	7.44406e-06	2.48789	1.03443e-10	0.913936	0.0788471	1.30775	0.0179186	0.481182	0.145376	NA	GO:0003676(nucleic acid binding);GO:0003723(RNA binding);GO:0003723(RNA binding)
HORVU5Hr1G081070	Kinesin motor domain-containing protein	-1.12463	0.000607922	-1.94026	0.00295591	-3.20943	3.08832e-07	1.19943	0.109683	0.972666	0.220534	1.22087	0.0171252	NA	GO:0000166(nucleotide binding);GO:0003774(motor activity);GO:0003777(microtubule motor activity);GO:0005524(ATP binding);GO:0007018(microtubule-based movement);GO:0008017(microtubule binding);GO:0016020(membrane);GO:0016021(integral component of membrane);GO:0016021(integral component of membrane)
HORVU7Hr1G087250	L-ascorbate oxidase	-4.90173	3.51261e-20	-3.59885	5.57522e-06	-4.82388	3.85897e-18	1.39972	0.0188189	2.50705	0.000892127	2.68541	7.15634e-05	00053(Ascorbate and aldarate metabolism);00053(Ascorbate and aldarate metabolism)	GO:0005507(copper ion binding);GO:0016491(oxidoreductase activity);GO:0046872(metal ion binding);GO:0055114(oxidation-reduction process);GO:0055114(oxidation-reduction process)
HORVU1Hr1G056570	Late embryogenesis abundant protein, group 3-like	-6.65668	2.85848e-31	-3.13619	6.69177e-10	-3.51256	7.80458e-08	-1.07263	0.000143517	0.967684	0.0762518	-0.853604	0.0845917	NA	NA
HORVU6Hr1G055750	LETM1 and EF-hand domain-containing protein 1, mitochondrial-like	1.44076	3.86281e-06	1.88563	2.61878e-07	1.87354	3.39436e-09	0.65077	0.128093	1.56418	4.70595e-05	0.796828	0.00465657	NA	GO:0005509(calcium ion binding);GO:0005739(mitochondrion);GO:0016020(membrane);GO:0016021(integral component of membrane);GO:0043022(ribosome binding);GO:0043022(ribosome binding)
HORVU6Hr1G079030	Lipocln_cytosolic_FA-bd_dom domain-containing protein	-1.10033	1.61416e-06	-1.5771	6.28084e-06	-2.52123	1.97573e-11	-0.16404	0.0561701	-0.93276	0.0229743	-0.99531	0.0284499	NA	GO:0005215(transporter activity);GO:0005215(transporter activity)
HORVU2Hr1G099260	LRR receptor-like serine/threonine-protein kinase	-2.28412	3.56522e-06	-2.15039	0.00053436	-2.00857	0.00108941	-0.385687	0.129425	-0.532489	0.217505	-1.09807	0.136184	NA	GO:0005515(protein binding);GO:0016020(membrane);GO:0016021(integral component of membrane)
HORVU3Hr1G098730	LRRNT_2 domain-containing protein	7.43668	3.91364e-21	6.66591	9.60225e-12	6.18454	1.23288e-10	2.81409	0.00039475	2.46833	0.00642934	3.46357	5.27494e-06	00500(Starch and sucrose metabolism);00460(Cyanoamino acid metabolism);00940(Phenylpropanoid biosynthesis);00940(Phenylpropanoid biosynthesis)	NA
HORVU7Hr1G119770	MDIS1-interacting receptor like kinase 2-like	11.778	2.47554e-12	14.0455	6.49044e-16	13.9943	1.89633e-19	4.19097	1	6.09201	1.61048e-12	7.93518	2.86161e-19	NA	GO:0000166(nucleotide binding);GO:0004672(protein kinase activity);GO:0005515(protein binding);GO:0005524(ATP binding);GO:0006468(protein phosphorylation);GO:0016020(membrane);GO:0016021(integral component of membrane);GO:0016021(integral component of membrane)
HORVU5Hr1G105250	Methionine S-methyltransferase isoform X2	3.59012	1.29432e-05	3.87241	1.79602e-05	3.54718	3.83392e-05	2.19833	1.81349e-11	1.89143	8.41324e-06	-0.0403619	0.724854	00450(Selenocompound metabolism);00450(Selenocompound metabolism)	GO:0003824(catalytic activity);GO:0008168(methyltransferase activity);GO:0009058(biosynthetic process);GO:0016740(transferase activity);GO:0030170(pyridoxal phosphate binding);GO:0030732(methionine S-methyltransferase activity);GO:0032259(methylation);GO:0032259(methylation)
HORVU6Hr1G002330	MIKC-type MADS-box transcription factor AGL1	2.27269	1.15134e-05	2.10019	0.000490704	2.95951	3.53088e-10	0.132225	0.753491	0.351157	0.725537	1.52887	0.00273905	NA	GO:0000977(RNA polymerase II regulatory region sequence-specific DNA binding);GO:0003677(DNA binding);GO:0003700(DNA-binding transcription factor activity);GO:0005634(nucleus);GO:0006351(transcription, DNA-templated);GO:0006355(regulation of transcription, DNA-templated);GO:0045944(positive regulation of transcription by RNA polymerase II);GO:0046983(protein dimerization activity);GO:0046983(prot…
HORVU6Hr1G074020	Mitochondrial metalloendopeptidase OMA1-like	-1.25605	4.82982e-08	-1.4979	2.19113e-05	-2.10609	5.72842e-08	-0.270474	0.0317809	-1.17111	0.000427319	0.559062	0.0346179	NA	GO:0004222(metalloendopeptidase activity);GO:0006508(proteolysis);GO:0008233(peptidase activity);GO:0008237(metallopeptidase activity);GO:0016020(membrane);GO:0016021(integral component of membrane);GO:0016787(hydrolase activity);GO:0016787(hydrolase activity)
HORVU3Hr1G067610	Mitochondrial outer membrane protein porin 2	7.1099	8.95087e-11	7.98413	2.33279e-09	7.27148	1.17382e-10	1.60268	1	4.1841	3.95583e-05	1.71579	1	NA	GO:0005741(mitochondrial outer membrane);GO:0008308(voltage-gated anion channel activity);GO:0015698(inorganic anion transport);GO:0055085(transmembrane transport);GO:0098656(anion transmembrane transport);GO:0098656(anion transmembrane transport)
HORVU1Hr1G064440	MLO-like protein 1	1.57288	2.93205e-07	1.49699	4.99475e-05	2.14329	5.93654e-11	0.373831	0.760945	0.854402	0.0322235	1.2214	0.000153519	NA	GO:0005516(calmodulin binding);GO:0006952(defense response);GO:0009607(response to biotic stimulus);GO:0016020(membrane);GO:0016021(integral component of membrane);GO:0016021(integral component of membrane)
HORVU4Hr1G065110	Mn-specific cation diffusion facilitator transporter MTP8.1	-1.18796	9.63114e-07	-1.28265	0.000740895	-2.71948	8.50816e-11	-0.447889	0.0177454	0.213222	0.858242	0.0445347	0.626466	NA	GO:0006812(cation transport);GO:0008324(cation transmembrane transporter activity);GO:0016020(membrane);GO:0016021(integral component of membrane);GO:0055085(transmembrane transport);GO:0098655(cation transmembrane transport);GO:0098655(cation transmembrane transport)
HORVU3Hr1G019190	Monothiol glutaredoxin-S2-like	-1.53534	1.46865e-07	-2.15428	3.04638e-08	-2.22556	0.000626126	-0.0836305	0.179379	-1.28676	1.92503e-05	-0.0802866	0.780318	NA	GO:0005623(cell);GO:0009055(electron transfer activity);GO:0015035(protein disulfide oxidoreductase activity);GO:0022900(electron transport chain);GO:0045454(cell redox homeostasis);GO:0055114(oxidation-reduction process);GO:0055114(oxidation-reduction process)
HORVU7Hr1G122350	Mugineic-acid 3-dioxygenase	4.11232	0.00013014	9.65759	5.61168e-29	10.6205	3.1324e-52	-2.48383	1	2.90782	1	1.43094	1	NA	GO:0016491(oxidoreductase activity);GO:0046872(metal ion binding);GO:0055114(oxidation-reduction process);GO:0055114(oxidation-reduction process)
HORVU3Hr1G083330	NAC domain-containing protein 73-like	3.33341	4.27309e-05	8.75863	1.2267e-40	10.5785	1.95194e-67	1.61048	1	6.37408	1.54508e-08	6.1925	1.9606e-07	NA	GO:0003677(DNA binding);GO:0005634(nucleus);GO:0006355(regulation of transcription, DNA-templated);GO:0006355(regulation of transcription, DNA-templated)
HORVU6Hr1G075830	NAC domain-containing protein 94	5.18796	7.03088e-26	3.68401	2.50073e-09	3.02242	3.81648e-07	3.70913	1.84671e-26	2.12277	6.64167e-05	-0.456414	0.7851	04141(Protein processing in endoplasmic reticulum);04120(Ubiquitin mediated proteolysis);04120(Ubiquitin mediated proteolysis)	GO:0003677(DNA binding);GO:0005634(nucleus);GO:0006355(regulation of transcription, DNA-templated);GO:0006355(regulation of transcription, DNA-templated)
HORVU3Hr1G018530	NAD(P)H dehydrogenase	1.80605	0.00133834	5.01365	4.00961e-18	5.29591	1.0078e-22	0.638832	0.477446	1.47259	0.0133554	2.96186	1.02335e-10	04626(Plant-pathogen interaction);04626(Plant-pathogen interaction)	GO:0016491(oxidoreductase activity);GO:0055114(oxidation-reduction process);GO:0055114(oxidation-reduction process)
HORVU3Hr1G108000	Non-specific serine/threonine protein kinase	-1.49225	0.000296809	-2.39077	0.000246494	-2.44802	0.00303194	-0.152055	1	-0.591765	1	0.0756428	1	NA	GO:0000166(nucleotide binding);GO:0004672(protein kinase activity);GO:0004674(protein serine/threonine kinase activity);GO:0005524(ATP binding);GO:0006468(protein phosphorylation);GO:0016020(membrane);GO:0016021(integral component of membrane);GO:0016301(kinase activity);GO:0016310(phosphorylation);GO:0016740(transferase activity);GO:0016740(transferase activity)
HORVU5Hr1G092700	Nuclear transcription factor Y subunit A-10-like	4.03605	1.1155e-16	3.45686	2.53342e-07	2.37465	6.09027e-06	1.05219	0.159097	1.06116	0.144042	0.908055	0.079307	NA	GO:0003700(DNA-binding transcription factor activity);GO:0006355(regulation of transcription, DNA-templated);GO:0006355(regulation of transcription, DNA-templated)
HORVU5Hr1G007890	Nuclear transcription factor Y subunit A-2	2.75356	1.57874e-08	2.1619	9.25207e-05	2.32023	1.43328e-05	0.199715	0.872086	-0.548443	0.268644	-1.59709	0.0742823	NA	GO:0003677(DNA binding);GO:0003700(DNA-binding transcription factor activity);GO:0006355(regulation of transcription, DNA-templated);GO:0016602(CCAAT-binding factor complex);GO:0016602(CCAAT-binding factor complex)
HORVU0Hr1G009390	Oxalate oxidase-like protein or germin-like protein	15.7091	2.50264e-09	13.5636	4.31714e-09	14.722	3.73658e-11	5.13378	1	6.83357	4.77997e-09	9.40671	4.23522e-15	00450(Selenocompound metabolism);00450(Selenocompound metabolism)	NA
HORVU1Hr1G004670	Papain-like cysteine proteinase	-8.42853	2.525e-14	-8.29976	1.26566e-11	-8.16999	2.15555e-12	-7.90684	1	-0.136957	1	1.61785	1	04145(Phagosome);04145(Phagosome)	GO:0006508(proteolysis);GO:0008234(cysteine-type peptidase activity);GO:0008234(cysteine-type peptidase activity)
HORVU2Hr1G044360	Peroxidase	-2.99653	7.50291e-11	-4.02952	0.00105506	-16.1898	1.05896e-27	3.19851	0.00598594	-0.687759	1	0.435661	1	00940(Phenylpropanoid biosynthesis);00940(Phenylpropanoid biosynthesis)	GO:0004601(peroxidase activity);GO:0005576(extracellular region);GO:0006979(response to oxidative stress);GO:0016491(oxidoreductase activity);GO:0020037(heme binding);GO:0042744(hydrogen peroxide catabolic process);GO:0046872(metal ion binding);GO:0055114(oxidation-reduction process);GO:0098869(cellular oxidant detoxification);GO:0098869(cellular oxidant detoxification)
HORVU2Hr1G018570	Peroxidase	-2.95067	0.000718726	-4.93363	0.000102819	-13.2768	1.61478e-11	8.92297	1	0	1	0	1	00940(Phenylpropanoid biosynthesis)	GO:0004601(peroxidase activity);GO:0005576(extracellular region);GO:0006979(response to oxidative stress);GO:0016491(oxidoreductase activity);GO:0020037(heme binding);GO:0042744(hydrogen peroxide catabolic process);GO:0046872(metal ion binding);GO:0055114(oxidation-reduction process);GO:0098869(cellular oxidant detoxification)
HORVU4Hr1G072500	Phytocyanin domain-containing protein	4.55363	0.000641984	8.05523	3.22119e-13	8.04747	4.6343e-13	0.196272	1	0.818513	1	2.16834	1	NA	GO:0009055(electron transfer activity);GO:0016020(membrane);GO:0016021(integral component of membrane);GO:0022900(electron transport chain);GO:0022900(electron transport chain)
HORVU4Hr1G072560	Phytocyanin domain-containing protein	3.39032	8.43791e-05	7.9329	6.42413e-21	8.72334	5.94876e-26	1.35734	1	3.04465	1	4.63442	1	NA	GO:0009055(electron transfer activity);GO:0022900(electron transport chain)
HORVU4Hr1G066810	High molecular mass early light-inducible protein HV58, chloroplastic-like	-14.2943	6.03321e-14	-6.72793	6.54453e-07	-14.2943	5.7757e-12	-2.51643	2.64139e-07	-0.805935	0.240869	0.0170174	0.761323	NA	GO:0016020(membrane);GO:0016021(integral component of membrane);GO:0016021(integral component of membrane)
HORVU0Hr1G019500	Predicted protein	-3.54672	1.79239e-06	-3.78102	2.02768e-05	-4.20349	7.87824e-07	1.06647	1	0.057922	1	1.51784	1	NA	GO:0016747(transferase activity, transferring acyl groups other than amino-acyl groups);GO:0016747(transferase activity, transferring acyl groups other than amino-acyl groups)
HORVU0Hr1G015960	Predicted protein	-1.16572	9.32412e-07	-2.29377	2.21879e-08	-2.03789	1.77079e-07	-0.776869	0.00251745	-0.980984	0.00898687	-1.57072	0.00334068	NA	GO:0005515(protein binding);GO:0016020(membrane);GO:0016021(integral component of membrane);GO:0016021(integral component of membrane)
HORVU4Hr1G074400	Predicted protein, partial	-7.20642	4.04208e-12	-3.46352	4.23556e-05	-2.708	0.00231548	2.50843	0.00207652	0.0865503	1	2.27625	1	NA	GO:0005515(protein binding);GO:0005515(protein binding)
HORVU3Hr1G070270	Probable amino-acid acetyltransferase NAGS2, chloroplastic	-1.10663	0.000101353	-1.49819	0.000452478	-1.27011	0.00291257	-0.621951	0.00268919	-0.411281	0.156899	-1.03749	0.0555025	00220(Arginine biosynthesis);00220(Arginine biosynthesis)	GO:0004042(acetyl-CoA:L-glutamate N-acetyltransferase activity);GO:0005737(cytoplasm);GO:0006526(arginine biosynthetic process);GO:0006526(arginine biosynthetic process)
HORVU4Hr1G054790	Probable galacturonosyltransferase-like 7	-1.09542	0.000405327	-1.36743	0.00246812	-1.64939	0.00112842	-0.0789846	0.331392	-0.940226	0.0406453	0.133528	0.429425	NA	GO:0016740(transferase activity);GO:0016757(transferase activity, transferring glycosyl groups);GO:0016757(transferase activity, transferring glycosyl groups)
HORVU1Hr1G063150	Probable membrane-associated kinase regulator 1	-1.59298	5.70249e-07	-3.95559	2.48323e-13	-5.70604	9.80996e-21	0.524807	0.49481	-1.31026	0.0184428	-5.08521	2.07627e-11	NA	GO:0005829(cytosol);GO:0005886(plasma membrane);GO:0009536(plastid);GO:0009741(response to brassinosteroid);GO:0019210(kinase inhibitor activity);GO:0033673(negative regulation of kinase activity)
HORVU7Hr1G098320	Probable xyloglucan endotransglucosylase/hydrolase protein 23	-4.61571	1.56691e-23	-3.16491	4.59141e-09	-4.21961	8.78214e-13	1.05337	0.137617	-0.302184	0.558988	0.0874914	0.671872	NA	GO:0004553(hydrolase activity, hydrolyzing O-glycosyl compounds);GO:0005576(extracellular region);GO:0005618(cell wall);GO:0005975(carbohydrate metabolic process);GO:0006073(cellular glucan metabolic process);GO:0008152(metabolic process);GO:0010411(xyloglucan metabolic process);GO:0016740(transferase activity);GO:0016762(xyloglucan:xyloglucosyl transferase activity);GO:0016787(hydrolase activity…
HORVU1Hr1G020620	Protein CHUP1, chloroplastic-like	1.22187	0.000141035	1.89569	4.35595e-07	1.72814	2.6383e-08	0.323345	0.914459	0.871826	0.0195894	0.606038	0.0098005	NA	GO:0005515(protein binding);GO:0016020(membrane);GO:0016021(integral component of membrane);GO:0016573(histone acetylation);GO:0044030(regulation of DNA methylation);GO:1901535(regulation of DNA demethylation);GO:1901535(regulation of DNA demethylation)
HORVU3Hr1G080490	Protein FAR1-RELATED SEQUENCE 5-like	-5.79096	0.000139698	-11.5631	7.38106e-05	-11.5631	3.02521e-05	6.18885	1	0	1	0	1	NA	GO:0006355(regulation of transcription, DNA-templated);GO:0006355(regulation of transcription, DNA-templated)
HORVU3Hr1G089490	Protein kinase domain-containing protein	2.01335	0.00265392	2.38976	0.00136314	1.91866	0.00249678	0.118157	0.773789	0.315494	0.766042	0.928787	0.1389	NA	GO:0004672(protein kinase activity);GO:0005515(protein binding);GO:0005524(ATP binding);GO:0006468(protein phosphorylation);GO:0016020(membrane);GO:0016021(integral component of membrane);GO:0016021(integral component of membrane)
HORVU5Hr1G097400	Protein kinase domain-containing protein	1.12225	0.00130441	1.20317	0.00164368	1.61313	2.49966e-07	0.48888	0.417487	0.878263	0.0495863	0.636899	0.0123585	03008(Ribosome biogenesis in eukaryotes);04712(Circadian rhythm - plant);04712(Circadian rhythm - plant)	GO:0000166(nucleotide binding);GO:0004672(protein kinase activity);GO:0004674(protein serine/threonine kinase activity);GO:0005524(ATP binding);GO:0006468(protein phosphorylation);GO:0006468(protein phosphorylation)
HORVU3Hr1G000050	Protein kinase domain-containing protein	6.05597	1.20138e-07	8.10036	3.58796e-11	7.36741	7.87528e-11	-0.971868	1	0.559022	1	-6.08273	1	NA	GO:0000166(nucleotide binding);GO:0004672(protein kinase activity);GO:0004674(protein serine/threonine kinase activity);GO:0005515(protein binding);GO:0005524(ATP binding);GO:0005789(endoplasmic reticulum membrane);GO:0006468(protein phosphorylation);GO:0016020(membrane);GO:0016021(integral component of membrane);GO:0016021(integral component of membrane)
HORVU5Hr1G119270	Protein kinase domain-containing protein	3.83498	1.54566e-05	7.86538	1.7676e-28	8.71873	1.18061e-56	1.34596	0.0076171	2.69219	1.41179e-08	2.96204	1.05056e-13	NA	GO:0000166(nucleotide binding);GO:0004672(protein kinase activity);GO:0004674(protein serine/threonine kinase activity);GO:0005509(calcium ion binding);GO:0005524(ATP binding);GO:0006468(protein phosphorylation);GO:0016020(membrane);GO:0016021(integral component of membrane);GO:0030247(polysaccharide binding);GO:0030247(polysaccharide binding)
HORVU1Hr1G025280	Protein kinase domain-containing protein	-12.2321	3.3248e-15	-6.36844	1.87784e-08	-12.2321	5.27777e-13	0	1	0	1	0	1	NA	GO:0000166(nucleotide binding);GO:0004672(protein kinase activity);GO:0004674(protein serine/threonine kinase activity);GO:0005515(protein binding);GO:0005524(ATP binding);GO:0006468(protein phosphorylation);GO:0016020(membrane);GO:0016021(integral component of membrane);GO:0016301(kinase activity);GO:0016310(phosphorylation);GO:0016740(transferase activity);GO:0016740(transferase activity)
HORVU6Hr1G058780	Protein kinase domain-containing protein	-1.93325	2.51484e-06	-2.82154	3.79658e-06	-2.09831	0.00029016	2.365	1.36716e-14	-0.498038	0.147483	0.499064	0.12292	NA	GO:0000166(nucleotide binding);GO:0004672(protein kinase activity);GO:0004674(protein serine/threonine kinase activity);GO:0005524(ATP binding);GO:0006468(protein phosphorylation);GO:0006468(protein phosphorylation)
HORVU4Hr1G003430	Protein MAM3	-1.72672	2.34666e-13	-1.57431	6.07305e-06	-1.77757	1.1447e-05	-0.672707	0.000196794	-0.258937	0.241473	-0.621189	0.290156	NA	GO:0016020(membrane);GO:0016021(integral component of membrane);GO:0016021(integral component of membrane)
HORVU3Hr1G090690	Protein TRIGALACTOSYLDIACYLGLYCEROL 5, chloroplastic-like isoform X2	-1.35803	3.2015e-05	-1.71191	0.000313508	-2.53321	4.53188e-06	-0.439369	0.04428	-0.955947	0.0188295	-0.829435	0.200186	NA	GO:0016020(membrane);GO:0016021(integral component of membrane);GO:0016021(integral component of membrane)
HORVU1Hr1G090360	Protein-serine/threonine phosphatase	-5.6971	1.90821e-11	-3.49958	0.000985817	-2.29071	0.00469052	-0.660005	0.192552	-0.238486	0.566446	-0.474387	0.721589	04016(MAPK signaling pathway - plant);04075(Plant hormone signal transduction);04075(Plant hormone signal transduction)	GO:0003824(catalytic activity);GO:0004721(phosphoprotein phosphatase activity);GO:0004722(protein serine/threonine phosphatase activity);GO:0005634(nucleus);GO:0006470(protein dephosphorylation);GO:0009788(negative regulation of abscisic acid-activated signaling pathway);GO:0010030(positive regulation of seed germination);GO:0016787(hydrolase activity);GO:0043169(cation binding);GO:0046872(metal …
HORVU1Hr1G080290	Protein-serine/threonine phosphatase	-1.21247	8.3246e-06	-1.43327	0.000291885	-1.4487	0.000586195	0.433251	0.76056	-0.214303	0.41296	-0.888194	0.178969	04016(MAPK signaling pathway - plant);04075(Plant hormone signal transduction);04075(Plant hormone signal transduction)	GO:0003824(catalytic activity);GO:0004721(phosphoprotein phosphatase activity);GO:0004722(protein serine/threonine phosphatase activity);GO:0006470(protein dephosphorylation);GO:0016787(hydrolase activity);GO:0043169(cation binding);GO:0046872(metal ion binding);GO:0046872(metal ion binding)
HORVU3Hr1G059170	Protein-serine/threonine phosphatase	-2.33174	3.95536e-08	-3.0857	1.51112e-08	-2.94056	1.85161e-06	0.364542	0.906611	0.637964	0.276792	-0.195419	0.983876	04016(MAPK signaling pathway - plant);04075(Plant hormone signal transduction);04075(Plant hormone signal transduction)	GO:0003824(catalytic activity);GO:0004721(phosphoprotein phosphatase activity);GO:0004722(protein serine/threonine phosphatase activity);GO:0006470(protein dephosphorylation);GO:0016787(hydrolase activity);GO:0043169(cation binding);GO:0046872(metal ion binding);GO:0046872(metal ion binding)
HORVU6Hr1G030080	Putative non-LTR retroelement reverse transcriptase	-3.40762	4.20994e-10	-3.46236	6.36537e-08	-3.89767	3.10237e-08	0.676367	0.215434	-2.18013	1.27888e-06	-0.652073	0.338752	04712(Circadian rhythm - plant);04712(Circadian rhythm - plant)	GO:0003676(nucleic acid binding);GO:0004523(RNA-DNA hybrid ribonuclease activity);GO:0005515(protein binding);GO:0005622(intracellular);GO:0005634(nucleus);GO:0008270(zinc ion binding);GO:0090502(RNA phosphodiester bond hydrolysis, endonucleolytic);GO:0090502(RNA phosphodiester bond hydrolysis, endonucleolytic)
HORVU3Hr1G089020	RECA_3 domain-containing protein	1.27699	0.000288791	1.45436	7.18019e-05	1.51955	3.7178e-06	0.787564	0.0793408	0.902372	0.0370275	-0.0674468	0.751228	03440(Homologous recombination);03440(Homologous recombination)	GO:0000166(nucleotide binding);GO:0003677(DNA binding);GO:0003697(single-stranded DNA binding);GO:0005524(ATP binding);GO:0006259(DNA metabolic process);GO:0006281(DNA repair);GO:0006310(DNA recombination);GO:0006974(cellular response to DNA damage stimulus);GO:0008094(DNA-dependent ATPase activity);GO:0008094(DNA-dependent ATPase activity)
HORVU5Hr1G001000	Receptor-like protein kinase At4g00960	14.9466	3.19019e-18	12.9116	7.50713e-08	11.696	2.27466e-08	4.77269	1.64009e-11	3.49825	0.000165249	2.4591	1	NA	GO:0000166(nucleotide binding);GO:0004672(protein kinase activity);GO:0004674(protein serine/threonine kinase activity);GO:0005524(ATP binding);GO:0006468(protein phosphorylation);GO:0006468(protein phosphorylation)
HORVU1Hr1G078050	Root-specific lectin	-1.23881	5.31229e-05	-4.27339	3.41035e-14	-4.61734	4.52806e-10	1.36004	0.0752295	1.33557	0.0238016	-1.24933	0.0998115	00520(Amino sugar and nucleotide sugar metabolism);04016(MAPK signaling pathway - plant);04016(MAPK signaling pathway - plant)	GO:0008061(chitin binding);GO:0030246(carbohydrate binding);GO:0030246(carbohydrate binding)
HORVU7Hr1G121560	Ricin B-like lectin R40C1	3.87368	6.56582e-12	2.31986	0.00278313	2.31159	0.000171424	-1.14838	1	-2.52707	1	-1.37671	1	NA	NA
HORVU2Hr1G005630	RING-CH-type domain-containing protein	-1.15247	0.00242065	-1.70256	0.00154127	-2.80685	0.000485997	0.684291	0.34495	-0.635289	0.23484	-0.73023	0.368595	NA	GO:0008270(zinc ion binding);GO:0016020(membrane);GO:0016021(integral component of membrane);GO:0046872(metal ion binding);GO:0046872(metal ion binding)
HORVU1Hr1G051370	RING-type domain-containing protein	1.76846	6.67457e-05	2.37998	2.73789e-07	2.54374	5.63852e-10	0.441034	0.706043	1.2975	0.02922	1.03927	0.00979764	04141(Protein processing in endoplasmic reticulum);04141(Protein processing in endoplasmic reticulum)	NA
HORVU5Hr1G071280	RING-type domain-containing protein	-2.6956	2.30346e-18	-1.8885	2.51825e-06	-2.05425	5.41703e-07	-0.350743	0.0131028	-1.04444	0.00332209	-0.537194	0.366148	NA	GO:0008270(zinc ion binding);GO:0016020(membrane);GO:0016021(integral component of membrane);GO:0046872(metal ion binding)
HORVU2Hr1G092920	RNA-binding (RRM/RBD/RNP motifs) family protein	1.21552	0.000127975	1.8155	6.63937e-07	2.30146	4.60575e-13	0.565522	0.257476	0.803105	0.0389447	1.23107	0.000203096	03040(Spliceosome);03040(Spliceosome)	GO:0003676(nucleic acid binding);GO:0003723(RNA binding);GO:0003723(RNA binding)
HORVU7Hr1G097500	RPN1_C domain-containing protein	1.81589	9.98449e-06	2.64791	1.89725e-09	3.52448	8.85577e-24	1.18211	0.00138366	0.988693	0.0208622	1.19138	0.00110728	03050(Proteasome);03050(Proteasome)	GO:0016020(membrane);GO:0016021(integral component of membrane);GO:0016021(integral component of membrane)
HORVU2Hr1G029250	SAP domain-containing protein	1.90846	4.18371e-07	2.38631	3.85978e-09	2.62968	4.14407e-13	0.752862	0.126924	0.839787	0.0616393	0.237243	0.300295	03040(Spliceosome);03013(RNA transport);03015(mRNA surveillance pathway);03015(mRNA surveillance pathway)	GO:0003676(nucleic acid binding);GO:0003676(nucleic acid binding)
HORVU1Hr1G037150	Serine/threonine-protein kinase PBL1 isoform X1	14.2227	1.89167e-17	13.4984	8.02432e-06	13.2785	7.2592e-15	2.70385	0.0770093	3.14879	0.0434852	3.83413	0.00592235	NA	GO:0004672(protein kinase activity);GO:0005524(ATP binding);GO:0006468(protein phosphorylation);GO:0006468(protein phosphorylation)
HORVU1Hr1G055340	Serine/threonine-protein kinase SAPK3	-4.55695	5.48519e-22	-2.67182	6.08762e-07	-2.53125	8.05557e-07	-0.692455	0.00268635	-0.0013126	0.772929	0.085238	0.489523	04016(MAPK signaling pathway - plant);04075(Plant hormone signal transduction);04075(Plant hormone signal transduction)	GO:0000166(nucleotide binding);GO:0004672(protein kinase activity);GO:0004674(protein serine/threonine kinase activity);GO:0005524(ATP binding);GO:0006468(protein phosphorylation);GO:0006468(protein phosphorylation)
HORVU2Hr1G106720	Speckle-type POZ protein-like protein	6.37699	4.47472e-09	5.30615	3.91108e-05	5.48295	2.24687e-06	-2.5931	1	-10.8688	1	-10.8688	1	NA	NA
HORVU7Hr1G084490	Subtilisin-like protease SBT1.7	13.0972	6.56089e-15	12.2412	9.17706e-09	11.8096	1.02152e-10	5.21161	4.61228e-08	1.84004	1	4.31437	1	NA	GO:0004252(serine-type endopeptidase activity);GO:0006508(proteolysis);GO:0008233(peptidase activity);GO:0008236(serine-type peptidase activity);GO:0016787(hydrolase activity)
HORVU6Hr1G073390	Tify domain-containing protein	-2.31326	0.000117707	-13.3243	1.72764e-11	-5.80069	1.25853e-07	0	1	0	1	0	1	04075(Plant hormone signal transduction);04075(Plant hormone signal transduction)	NA
HORVU5Hr1G113810	Hsp70-binding protein 1-like isoform X1	-1.55193	2.61604e-11	-1.50318	6.50134e-06	-1.86477	2.72466e-07	-0.455104	0.00463006	-1.47875	8.16071e-07	0.741807	0.0110297	04141(Protein processing in endoplasmic reticulum);00130(Ubiquinone and other terpenoid-quinone biosynthesis);00130(Ubiquinone and other terpenoid-quinone biosynthesis)	NA
HORVU3Hr1G018680	Transcription factor bHLH107 isoform X1	4.55144	3.46538e-09	4.55635	2.63599e-09	3.6012	8.17716e-06	0.992205	0.339447	1.20944	0.164057	1.45639	0.0159944	NA	GO:0046983(protein dimerization activity);GO:0046983(protein dimerization activity)
HORVU7Hr1G103060	Ubiquitin2	2.15896	0.000630337	3.61044	3.34375e-15	2.21552	1.21104e-06	0.0465685	0.604521	0.874523	0.139114	1.55357	0.000356987	NA	NA
HORVU2Hr1G012340	UDPGT domain-containing protein	2.4122	0.00205617	8.90344	1.68509e-52	8.39293	1.18763e-60	0.393839	0.9482	1.9303	0.0330566	1.77023	0.0191011	NA	GO:0016740(transferase activity);GO:0016757(transferase activity, transferring glycosyl groups);GO:0016758(transferase activity, transferring hexosyl groups);GO:0016758(transferase activity, transferring hexosyl groups)
HORVU0Hr1G018590	Uncharacterized protein At4g06744	-7.6871	9.27264e-25	-8.43644	3.36194e-17	-15.2025	1.65119e-23	0	1	0	1	6.17832	1	NA	GO:0005515(protein binding);GO:0005515(protein binding)
HORVU4Hr1G006070	Uncharacterized protein LOC109734878	-3.01114	9.38813e-06	-2.28047	0.00015807	-2.44726	8.0977e-05	0.221418	0.867754	-1.01905	0.0456836	-0.917423	0.209566	NA	GO:0016020(membrane);GO:0016021(integral component of membrane);GO:0016021(integral component of membrane)
HORVU3Hr1G017940	Uncharacterized protein LOC109768526	-1.47151	3.05452e-05	-1.56678	0.00106886	-2.57719	1.1739e-06	0.443264	0.635701	0.0276548	0.831548	-0.723397	0.298026	NA	GO:0016020(membrane);GO:0016021(integral component of membrane);GO:0016021(integral component of membrane)
HORVU3Hr1G030650	WHy domain-containing protein	-5.36575	2.90109e-14	-3.14501	2.10928e-09	-2.62735	4.39814e-06	-0.145232	0.257126	1.07868	0.111275	0.46437	0.157694	NA	GO:0009269(response to desiccation)
HORVU1Hr1G092670	WHy domain-containing protein	-1.2701	2.40358e-06	-2.0877	8.52545e-08	-2.87812	1.53405e-10	0.746309	0.129687	0.0884706	0.963396	-0.660768	0.229436	NA	GO:0009269(response to desiccation);GO:0009269(response to desiccation)
HORVU6Hr1G070320	Xylem cysteine proteinase 1	-4.68554	5.5202e-07	-3.22626	0.000277902	-2.50561	0.00288021	-0.576561	0.163481	-0.891247	0.191759	0.538164	0.324383	NA	GO:0006508(proteolysis);GO:0008233(peptidase activity);GO:0008234(cysteine-type peptidase activity);GO:0016787(hydrolase activity);GO:0016787(hydrolase activity)
HORVU7Hr1G098260	Xyloglucan endotransglucosylase/hydrolase	-1.93879	7.83536e-08	-1.85008	8.62757e-06	-1.72093	3.11137e-05	1.43953	0.0133839	1.17369	0.071601	0.431465	0.269743	NA	GO:0004553(hydrolase activity, hydrolyzing O-glycosyl compounds);GO:0005576(extracellular region);GO:0005618(cell wall);GO:0005975(carbohydrate metabolic process);GO:0006073(cellular glucan metabolic process);GO:0008152(metabolic process);GO:0010411(xyloglucan metabolic process);GO:0016740(transferase activity);GO:0016762(xyloglucan:xyloglucosyl transferase activity);GO:0016787(hydrolase activity…

## Sheet: Table S4
				Table S4 DEGs specifically identified in ZU9
Gene ID	Description	G5	p-value	G10	p-value	G20	p-value	Z5	p-value	Z10	p-value	Z20	p-value	KEGG	GO
HORVU0Hr1G022360	(R)-mandelonitrile lyase-like	-4.46653	1.38977e-07	-1.66132	0.0685355	-1.15181	0.111133	-3.11259	7.81111e-07	-3.62102	6.04701e-07	-3.97995	4.10325e-06	00460(Cyanoamino acid metabolism);00460(Cyanoamino acid metabolism)	GO:0016614(oxidoreductase activity, acting on CH-OH group of donors);GO:0050660(flavin adenine dinucleotide binding);GO:0055114(oxidation-reduction process);GO:0055114(oxidation-reduction process)
HORVU3Hr1G116010	11S globulin seed storage protein 2-like	-0.998053	0.0837355	-7.8423	3.8977e-09	-6.97563	9.31348e-10	-4.06013	9.69412e-08	-5.96549	9.44491e-08	-4.39225	0.000491548	NA	GO:0045735(nutrient reservoir activity);GO:0045735(nutrient reservoir activity)
HORVU2Hr1G004230	12-oxo-phytodienoic acid reductase	2.71958	3.69139e-07	2.85781	2.33295e-06	1.15612	0.0598851	3.66547	2.92337e-35	3.19296	7.00327e-11	3.66204	9.17304e-24	00592(alpha-Linolenic acid metabolism);00592(alpha-Linolenic acid metabolism)	GO:0003824(catalytic activity);GO:0010181(FMN binding);GO:0016491(oxidoreductase activity);GO:0055114(oxidation-reduction process);GO:0055114(oxidation-reduction process)
HORVU7Hr1G077710	1-phosphatidylinositol-3-phosphate 5-kinase FAB1A-like isoform X2	0.0447411	0.382113	1.17743	0.0269186	1.91412	2.36736e-05	1.29398	7.5469e-05	2.80474	1.31041e-14	3.79877	3.74329e-16	00562(Inositol phosphate metabolism);04070(Phosphatidylinositol signaling system);04145(Phagosome);04145(Phagosome)	GO:0000166(nucleotide binding);GO:0005524(ATP binding);GO:0016020(membrane);GO:0016021(integral component of membrane);GO:0016301(kinase activity);GO:0016307(phosphatidylinositol phosphate kinase activity);GO:0016310(phosphorylation);GO:0016740(transferase activity);GO:0046488(phosphatidylinositol metabolic process);GO:0046854(phosphatidylinositol phosphorylation);GO:0046854(phosphatidylinositol …
HORVU6Hr1G025730	2-methylene-furan-3-one reductase	-5.16486	1.40842e-06	-1.93976	0.187479	-0.401036	0.665542	-15.0742	8.82474e-31	-6.76504	8.29513e-14	-5.71662	5.97393e-08	NA	GO:0008270(zinc ion binding);GO:0016491(oxidoreductase activity);GO:0042558(pteridine-containing compound metabolic process);GO:0055114(oxidation-reduction process);GO:0055114(oxidation-reduction process)
HORVU6Hr1G025630	2-methylene-furan-3-one reductase	-12.5605	3.19963e-06	-1.8038	0.237906	-1.55904	0.278642	-5.4073	5.41116e-11	-14.1912	2.35846e-16	-14.1912	3.6475e-14	NA	GO:0008270(zinc ion binding);GO:0016491(oxidoreductase activity);GO:0042558(pteridine-containing compound metabolic process);GO:0055114(oxidation-reduction process);GO:0055114(oxidation-reduction process)
HORVU7Hr1G022580	3-ketoacyl-CoA synthase 6-like	-12.7827	3.56418e-06	-4.53509	0.0140945	-1.50208	0.243101	-2.48568	0.00267147	-5.97598	1.11673e-06	-3.26829	0.00224327	00062(Fatty acid elongation)	GO:0003824(catalytic activity);GO:0006633(fatty acid biosynthetic process);GO:0016020(membrane);GO:0016021(integral component of membrane);GO:0016747(transferase activity, transferring acyl groups other than amino-acyl groups)
HORVU7Hr1G071550	3-oxoacyl-[acyl-carrier-protein] reductase 3, chloroplastic	-1.38538	0.00991698	-2.28573	0.0123495	-4.09756	2.99451e-05	-2.37899	2.90956e-05	-2.30455	0.000863698	-4.51472	2.0385e-05	00061(Fatty acid biosynthesis);01040(Biosynthesis of unsaturated fatty acids);00780(Biotin metabolism);00333(Prodigiosin biosyntheses)	GO:0004022(alcohol dehydrogenase (NAD) activity);GO:0016491(oxidoreductase activity);GO:0055114(oxidation-reduction process)
HORVU7Hr1G033770	3-oxoacyl-[acyl-carrier-protein] synthase I, chloroplastic	-0.388754	0.00757295	-1.23207	0.000233601	-1.91679	2.449e-08	-1.42909	1.70734e-10	-1.67616	1.01254e-08	-2.90769	6.47115e-14	00061(Fatty acid biosynthesis);00780(Biotin metabolism);00780(Biotin metabolism)	GO:0003824(catalytic activity);GO:0006633(fatty acid biosynthetic process);GO:0016740(transferase activity);GO:0016747(transferase activity, transferring acyl groups other than amino-acyl groups);GO:0016747(transferase activity, transferring acyl groups other than amino-acyl groups)
HORVU6Hr1G030390	4-coumarate: CoA ligase	0.201728	0.728736	1.24481	0.0229475	1.77974	0.000105618	2.07022	1.08993e-09	2.83923	2.00912e-09	3.77991	1.63848e-23	00360(Phenylalanine metabolism);00130(Ubiquinone and other terpenoid-quinone biosynthesis);00940(Phenylpropanoid biosynthesis);00940(Phenylpropanoid biosynthesis)	GO:0003824(catalytic activity);GO:0016207(4-coumarate-CoA ligase activity);GO:0016874(ligase activity);GO:0016874(ligase activity)
HORVU5Hr1G056930	ABC transporter A family member 7-like isoform X1	1.05227	0.0203443	1.79025	1.84193e-05	2.36186	5.8529e-12	1.39253	0.000812896	2.37148	1.70217e-07	2.0686	1.22252e-08	02010(ABC transporters);02010(ABC transporters)	GO:0000166(nucleotide binding);GO:0005524(ATP binding);GO:0016020(membrane);GO:0016021(integral component of membrane);GO:0016887(ATPase activity);GO:0042626(ATPase activity, coupled to transmembrane movement of substances);GO:0055085(transmembrane transport);GO:0099131(ATP hydrolysis coupled ion transmembrane transport);GO:0099131(ATP hydrolysis coupled ion transmembrane transport)
HORVU7Hr1G024960	ABC transporter C family member 10-like	2.08381	5.67256e-13	1.41813	0.000139761	0.684099	0.0248956	2.11134	2.27109e-14	2.08233	2.70129e-08	1.17093	4.79766e-05	02010(ABC transporters);02010(ABC transporters)	GO:0000166(nucleotide binding);GO:0005524(ATP binding);GO:0016020(membrane);GO:0016021(integral component of membrane);GO:0016887(ATPase activity);GO:0042626(ATPase activity, coupled to transmembrane movement of substances);GO:0055085(transmembrane transport);GO:0099131(ATP hydrolysis coupled ion transmembrane transport);GO:0099131(ATP hydrolysis coupled ion transmembrane transport)
HORVU2Hr1G007760	ABC transporter G family member 28-like	0.916313	0.0533004	3.0046	1.02741e-08	3.48488	8.03445e-17	2.30709	5.18906e-09	4.51805	1.93385e-21	5.87877	9.1868e-28	02010(ABC transporters);02010(ABC transporters)	NA
HORVU6Hr1G036800	ABC transporter G family member 39	5.41351	6.19091e-19	4.87799	1.95894e-11	2.19154	0.00646224	4.89857	8.76339e-14	6.16872	6.62744e-23	3.68516	5.27052e-08	02010(ABC transporters);02010(ABC transporters)	GO:0000166(nucleotide binding);GO:0005524(ATP binding);GO:0016020(membrane);GO:0016021(integral component of membrane);GO:0016887(ATPase activity);GO:0016887(ATPase activity)
HORVU7Hr1G056530	ABC transporter G family member 45	-0.11293	0.181214	-1.59335	0.000222884	-2.62555	6.59254e-08	-1.32382	5.54861e-06	-3.4718	1.12984e-11	-4.39109	4.66967e-08	02010(ABC transporters);02010(ABC transporters)	GO:0000166(nucleotide binding);GO:0005524(ATP binding);GO:0016020(membrane);GO:0016021(integral component of membrane);GO:0016887(ATPase activity);GO:0016887(ATPase activity)
HORVU4Hr1G014750	acetolactate synthase small subunit 2, chloroplastic-like	1.22338	0.00044919	1.42939	0.000120941	0.860797	0.00576858	1.24285	0.00015186	1.54355	7.07955e-05	1.08738	0.000192794	00650(Butanoate metabolism);00660(C5-Branched dibasic acid metabolism);00290(Valine, leucine and isoleucine biosynthesis);00770(Pantothenate and CoA biosynthesis);00770(Pantothenate and CoA biosynthesis)	GO:0003984(acetolactate synthase activity);GO:0009082(branched-chain amino acid biosynthetic process);GO:0050790(regulation of catalytic activity);GO:1990610(acetolactate synthase regulator activity);GO:1990610(acetolactate synthase regulator activity)
HORVU5Hr1G052090	acetyl-CoA acetyltransferase, cytosolic 1-like	-0.930175	1.05743e-07	-1.80903	1.63289e-08	-2.42367	2.87854e-12	-1.53818	1.62228e-12	-2.20017	1.77669e-13	-2.98956	8.38162e-12	00620(Pyruvate metabolism);00630(Glyoxylate and dicarboxylate metabolism);00640(Propanoate metabolism);00650(Butanoate metabolism);00071(Fatty acid degradation);00072(Synthesis and degradation of ketone bodies);00280(Valine, leucine and isoleucine degradation);00310(Lysine degradation);00380(Tryptophan metabolism);00900(Terpenoid backbone biosynthesis);00900(Terpenoid backbone biosynthesis)	GO:0003824(catalytic activity);GO:0016740(transferase activity);GO:0016746(transferase activity, transferring acyl groups);GO:0016747(transferase activity, transferring acyl groups other than amino-acyl groups);GO:0016747(transferase activity, transferring acyl groups other than amino-acyl groups)
HORVU2Hr1G099520	acyclic sesquiterpene synthase-like isoform X1	-12.0705	1	-12.0705	1	-12.0705	1	-14.1163	8.98238e-18	-14.1163	2.32155e-14	-14.1163	2.03873e-12	00900(Terpenoid backbone biosynthesis);00909(Sesquiterpenoid and triterpenoid biosynthesis)	GO:0000287(magnesium ion binding);GO:0010333(terpene synthase activity);GO:0016829(lyase activity)
HORVU5Hr1G084120	Acyl carrier protein 2, chloroplastic; AltName: Full=Acyl carrier protein II; Short=ACP II; Flags: Precursor	-0.953222	4.50407e-07	-1.80779	1.1673e-08	-2.35355	1.35679e-11	-1.31994	4.48659e-10	-2.01706	9.16261e-11	-2.71379	1.96147e-12	00190(Oxidative phosphorylation);00190(Oxidative phosphorylation)	GO:0006629(lipid metabolic process);GO:0006631(fatty acid metabolic process);GO:0006633(fatty acid biosynthetic process);GO:0009507(chloroplast);GO:0009536(plastid);GO:0031177(phosphopantetheine binding);GO:0031177(phosphopantetheine binding)
HORVU5Hr1G080650	acyl transferase 1-like	9.29451	1.66099e-37	8.09537	4.17636e-22	3.41802	1	7.23803	2.29556e-19	9.13876	1.31188e-45	6.39574	1.96367e-11	NA	GO:0016747(transferase activity, transferring acyl groups other than amino-acyl groups);GO:0016747(transferase activity, transferring acyl groups other than amino-acyl groups)
HORVU4Hr1G081180	acyl transferase 1-like	10.1427	1.17819e-32	9.4937	4.33638e-24	4.65742	1	6.52189	7.68488e-12	9.0782	2.88878e-33	6.19065	2.49391e-08	NA	GO:0016747(transferase activity, transferring acyl groups other than amino-acyl groups);GO:0016747(transferase activity, transferring acyl groups other than amino-acyl groups)
HORVU2Hr1G097350	acyl-acyl carrier protein thioesterase ATL3, chloroplastic-like	-0.955532	0.00241294	-1.80591	0.000565558	-1.49514	0.00904882	-1.08554	0.000255867	-1.88382	5.61918e-05	-2.02968	0.000717363	NA	GO:0016787(hydrolase activity);GO:0016787(hydrolase activity)
HORVU1Hr1G039540	acyltransferase-like protein At1g54570, chloroplastic	0.0888256	0.445425	0.4868	0.37169	0.10192	0.652162	1.29329	0.000129716	1.36295	0.000659887	1.96348	0.00100872	NA	GO:0016747(transferase activity, transferring acyl groups other than amino-acyl groups);GO:0016747(transferase activity, transferring acyl groups other than amino-acyl groups)
HORVU7Hr1G055220	ADP-ribosylation factor GTPase-activating protein AGD3-like	-0.813513	1.16794e-05	-1.29459	3.158e-05	-0.855603	0.0167967	-1.0839	1.60105e-07	-1.61527	1.29686e-06	-2.57352	4.06451e-10	04144(Endocytosis);04144(Endocytosis)	GO:0005096(GTPase activator activity);GO:0005515(protein binding);GO:0005737(cytoplasm);GO:0043547(positive regulation of GTPase activity);GO:0046872(metal ion binding);GO:0046872(metal ion binding)
HORVU6Hr1G031530	ALA-interacting subunit 3-like	0.0596672	0.389023	1.84581	9.78909e-05	1.97642	1.5892e-06	1.35979	0.000262279	3.45363	1.15466e-20	4.16625	8.78318e-19	NA	GO:0016020(membrane);GO:0016021(integral component of membrane);GO:0016021(integral component of membrane)
HORVU2Hr1G029960	alcohol dehydrogenase-like 2	-1.60938	0.00111387	-2.51698	0.00595972	-7.48238	8.52697e-11	-1.93623	0.000115379	-5.62365	1.7976e-09	-7.80308	5.87258e-15	00010(Glycolysis / Gluconeogenesis);00071(Fatty acid degradation);00350(Tyrosine metabolism);00350(Tyrosine metabolism)	GO:0008270(zinc ion binding);GO:0016020(membrane);GO:0016021(integral component of membrane);GO:0016491(oxidoreductase activity);GO:0055114(oxidation-reduction process);GO:0055114(oxidation-reduction process)
HORVU0Hr1G028680	aldehyde dehydrogenase family 2 member C4-like	15.855	3.92078e-08	15.162	1	16.522	2.82718e-08	8.58255	3.11459e-17	8.6178	4.76949e-12	9.507	4.67067e-22	00940(Phenylpropanoid biosynthesis);00940(Phenylpropanoid biosynthesis)	GO:0016491(oxidoreductase activity);GO:0016620(oxidoreductase activity, acting on the aldehyde or oxo group of donors, NAD or NADP as acceptor);GO:0055114(oxidation-reduction process);GO:0055114(oxidation-reduction process)
HORVU3Hr1G053090	amino-acid permease BAT1 homolog isoform X1	1.70645	6.83099e-05	1.29849	0.00942578	1.36768	0.00054802	1.84909	8.78512e-06	1.83734	0.00066709	1.93451	1.00789e-06	NA	GO:0006865(amino acid transport);GO:0016020(membrane);GO:0016021(integral component of membrane);GO:0022857(transmembrane transporter activity);GO:0055085(transmembrane transport);GO:0055085(transmembrane transport)
HORVU3Hr1G087690	ammonium transporter 2 member 3	2.48291	0.00017727	3.11801	3.75638e-08	1.14348	0.0576693	3.4353	1.05439e-07	3.92127	4.7054e-06	4.23305	6.53384e-11	NA	GO:0008519(ammonium transmembrane transporter activity);GO:0015696(ammonium transport);GO:0016020(membrane);GO:0016021(integral component of membrane);GO:0072488(ammonium transmembrane transport);GO:0072488(ammonium transmembrane transport)
HORVU2Hr1G084700	ankyrin-3	-1.18616	0.000109416	-1.02771	0.0141904	-2.92402	4.12097e-10	-1.64896	4.35448e-09	-3.017	7.25631e-08	-3.42933	9.91194e-10	NA	GO:0005515(protein binding);GO:0016020(membrane);GO:0016021(integral component of membrane);GO:0016021(integral component of membrane)
HORVU5Hr1G067720	annexin A13-like isoform X2	3.0623	0.00325668	3.98343	0.000166097	2.39002	0.0329617	3.92206	3.47279e-11	4.07907	3.05514e-09	3.39156	4.82599e-07	NA	GO:0005509(calcium ion binding);GO:0005544(calcium-dependent phospholipid binding);GO:0005544(calcium-dependent phospholipid binding)
HORVU3Hr1G066440	anoctamin-like protein Os01g0706700	1.38707	0.00042534	0.00623743	0.785935	0.023636	0.845826	1.56872	2.54929e-05	1.57497	0.000824744	1.0697	0.00218355	NA	GO:0016020(membrane);GO:0016021(integral component of membrane);GO:0016021(integral component of membrane)
HORVU5Hr1G110440	anthocyanidin 5,3-O-glucosyltransferase-like	-0.966733	1	-2.09091	1	-2.33014	1	-3.08956	2.54504e-05	-3.35847	2.3632e-05	-2.92455	0.00119406	00942(Anthocyanin biosynthesis)	GO:0016740(transferase activity);GO:0016757(transferase activity, transferring glycosyl groups);GO:0016758(transferase activity, transferring hexosyl groups)
HORVU2Hr1G108110	Anthocyanidin reductase	-1.47344	0.00655272	-1.13421	0.107771	-2.21955	0.0180752	4.76232	2.14069e-14	4.13345	7.19424e-07	4.43289	1.95683e-09	00941(Flavonoid biosynthesis);00941(Flavonoid biosynthesis)	GO:0003824(catalytic activity);GO:0003854(3-beta-hydroxy-delta5-steroid dehydrogenase activity);GO:0006694(steroid biosynthetic process);GO:0016616(oxidoreductase activity, acting on the CH-OH group of donors, NAD or NADP as acceptor);GO:0050662(coenzyme binding);GO:0055114(oxidation-reduction process);GO:0055114(oxidation-reduction process)
HORVU6Hr1G012740	Anthranilate N-benzoyltransferase protein 1	1.43973	1	4.54229	2.88859e-07	4.21481	1.41489e-08	2.66846	0.000701729	4.89776	1.71073e-08	5.63958	9.29523e-18	00940(Phenylpropanoid biosynthesis);00945(Stilbenoid, diarylheptanoid and gingerol biosynthesis);00941(Flavonoid biosynthesis);00941(Flavonoid biosynthesis)	GO:0016747(transferase activity, transferring acyl groups other than amino-acyl groups);GO:0016747(transferase activity, transferring acyl groups other than amino-acyl groups)
HORVU3Hr1G010140	AP2/ERF and B3 domain-containing protein Os01g0141000-like	2.29541	0.000218035	1.81046	0.0153307	-0.734551	0.515362	3.48407	1.59306e-05	4.39083	2.67351e-07	3.19045	0.000228218	NA	GO:0003677(DNA binding);GO:0005634(nucleus);GO:0006351(transcription, DNA-templated);GO:0006355(regulation of transcription, DNA-templated);GO:0006355(regulation of transcription, DNA-templated)
HORVU2Hr1G061440	AP2-like ethylene-responsive transcription factor ANT isoform X2	-3.33095	0.000148559	-0.323623	0.574493	-0.437881	0.695265	-4.21851	3.33874e-08	-3.61491	0.00117026	-2.97761	0.00129588	NA	NA
HORVU2Hr1G061430	AP2-like ethylene-responsive transcription factor ANT isoform X2	-4.01231	1.50609e-06	-0.820854	0.233189	-0.520812	0.484948	-4.11342	7.31761e-07	-2.90774	0.00078723	-3.73124	0.000979464	NA	NA
HORVU6Hr1G037680	Apoptotic protease-activating factor 1	1.27429	0.0151251	1.74264	7.21852e-05	1.6188	1.06672e-05	2.73407	2.30483e-15	2.95211	3.81592e-12	2.02882	1.51573e-07	04626(Plant-pathogen interaction);04626(Plant-pathogen interaction)	GO:0043531(ADP binding);GO:0043531(ADP binding)
HORVU5Hr1G058850	ASC1-like protein 1	0.866034	0.0247214	0.85589	0.0274349	1.21495	5.16042e-05	1.37042	7.42688e-06	1.72725	6.72338e-06	1.54167	1.27646e-07	00600(Sphingolipid metabolism);00600(Sphingolipid metabolism)	GO:0016020(membrane);GO:0016021(integral component of membrane);GO:0016021(integral component of membrane)
HORVU7Hr1G107410	aspartate--tRNA ligase 2, cytoplasmic	0	1	11.1329	1	9.87071	1	5.1898	4.64423e-06	6.73066	2.32283e-09	7.7438	1.89278e-16	00970(Aminoacyl-tRNA biosynthesis);00970(Aminoacyl-tRNA biosynthesis)	GO:0000166(nucleotide binding);GO:0004812(aminoacyl-tRNA ligase activity);GO:0004815(aspartate-tRNA ligase activity);GO:0005524(ATP binding);GO:0005737(cytoplasm);GO:0006418(tRNA aminoacylation for protein translation);GO:0006422(aspartyl-tRNA aminoacylation);GO:0006422(aspartyl-tRNA aminoacylation)
HORVU7Hr1G116780	aspartic proteinase nepenthesin-2-like	0.198357	0.809106	4.78341	2.05489e-08	5.4468	2.80838e-16	2.92734	3.01107e-08	5.21527	1.56628e-19	7.00336	1.84684e-28	NA	GO:0004190(aspartic-type endopeptidase activity);GO:0006508(proteolysis);GO:0008233(peptidase activity);GO:0016787(hydrolase activity);GO:0016787(hydrolase activity)
HORVU4Hr1G043960	aspartic proteinase nepenthesin-2-like	1.97272	1	8.18021	4.45321e-18	9.29191	1.33542e-17	2.66756	0.000900152	6.04849	2.04015e-12	8.02569	4.65339e-24	NA	GO:0004190(aspartic-type endopeptidase activity);GO:0006508(proteolysis)
HORVU7Hr1G090140	aspartic proteinase-like	0.707941	0.0934809	0.797908	0.043099	0.808111	0.00504612	1.44736	2.32018e-06	1.65277	1.74932e-06	1.42765	2.23292e-06	NA	GO:0004190(aspartic-type endopeptidase activity);GO:0006508(proteolysis);GO:0006629(lipid metabolic process);GO:0008233(peptidase activity);GO:0016787(hydrolase activity);GO:0016787(hydrolase activity)
HORVU7Hr1G045580	aspartyl protease family protein At5g10770-like	-3.91734	1	-2.9412	1	-2.74942	1	-1.63695	0.00256733	-2.39104	0.00115053	-2.94583	0.00098014	NA	GO:0004190(aspartic-type endopeptidase activity);GO:0006508(proteolysis);GO:0008233(peptidase activity);GO:0016787(hydrolase activity);GO:0016787(hydrolase activity)
HORVU2Hr1G096970	AT-hook motif nuclear-localized protein 10-like	-0.870648	1	1.21556	0.362244	-0.0588339	1	-4.36607	2.78221e-06	-2.52205	0.00199525	-3.54937	0.000263258	00590(Arachidonic acid metabolism);00480(Glutathione metabolism);00480(Glutathione metabolism)	NA
HORVU0Hr1G008860	autophagy protein 9	0.74474	0.0949144	0.921136	0.0173254	1.85842	2.6431e-08	1.19165	9.2589e-05	1.58871	1.79006e-05	1.93434	1.7578e-10	04136(Autophagy - other eukaryotes);04136(Autophagy - other eukaryotes)	GO:0005794(Golgi apparatus);GO:0006914(autophagy);GO:0015031(protein transport);GO:0016020(membrane);GO:0016021(integral component of membrane);GO:0030659(cytoplasmic vesicle membrane);GO:0031410(cytoplasmic vesicle);GO:0050832(defense response to fungus);GO:0050832(defense response to fungus)
HORVU7Hr1G071230	Auxin-induced protein 5NG4	-12.988	1	-12.988	1	-12.988	1	-4.10463	0.000721625	-3.32088	0.00120202	-15.5069	4.61383e-17	NA	GO:0016020(membrane);GO:0016021(integral component of membrane);GO:0022857(transmembrane transporter activity);GO:0055085(transmembrane transport)
HORVU0Hr1G016130	auxin-responsive protein SAUR32-like	3.18028	0.00365252	7.89575	4.90412e-12	7.56561	2.1505e-13	5.35466	2.29892e-13	7.41412	9.07255e-15	8.20341	4.74882e-31	04075(Plant hormone signal transduction)	GO:0009733(response to auxin)
HORVU4Hr1G018670	B3 domain-containing protein Os03g0620400-like	-0.472273	1	-4.48889	1	-3.75929	1	-2.7883	1.27741e-05	-4.99981	5.90828e-07	-5.16129	3.4693e-05	NA	GO:0003677(DNA binding);GO:0005634(nucleus);GO:0006351(transcription, DNA-templated);GO:0006355(regulation of transcription, DNA-templated);GO:0006355(regulation of transcription, DNA-templated)
HORVU3Hr1G025770	B3 domain-containing protein Os03g0620400-like	-11.8434	1	-11.8434	1	-3.3045	1	-1.92492	0.000557034	-5.1763	5.17209e-06	-4.29232	0.000697467	NA	GO:0003677(DNA binding);GO:0005634(nucleus);GO:0005634(nucleus)
HORVU2Hr1G069760	B3 domain-containing protein Os04g0386900-like	-0.459709	0.166227	-3.4842	1.36753e-05	-3.03792	1.30128e-05	-1.95346	1.96384e-06	-3.99608	4.2116e-07	-4.91131	8.12124e-07	NA	GO:0003677(DNA binding);GO:0005634(nucleus);GO:0006351(transcription, DNA-templated);GO:0006355(regulation of transcription, DNA-templated);GO:0006355(regulation of transcription, DNA-templated)
HORVU3Hr1G100400	basic 7S globulin-like	5.45412	1.55625e-09	1.9041	1	1.26946	1	7.85189	6.32194e-22	6.17834	5.00653e-05	6.06355	9.01389e-05	NA	GO:0004190(aspartic-type endopeptidase activity);GO:0006508(proteolysis);GO:0006508(proteolysis)
HORVU7Hr1G089160	berberine bridge enzyme-like 27	1.43623	0.0396048	4.71642	4.88422e-09	5.24134	7.18154e-34	2.25411	0.00015523	4.75794	7.6574e-11	6.02641	4.30771e-39	00052(Galactose metabolism);00500(Starch and sucrose metabolism);00500(Starch and sucrose metabolism)	GO:0016491(oxidoreductase activity);GO:0050660(flavin adenine dinucleotide binding);GO:0055114(oxidation-reduction process);GO:0071949(FAD binding);GO:0071949(FAD binding)
HORVU4Hr1G027740	beta 1,3-glucanase	0.176639	0.653774	1.5546	0.00162821	1.55813	0.000292127	1.90939	1.56807e-08	2.74439	5.12179e-07	3.06227	2.18528e-15	00500(Starch and sucrose metabolism);00500(Starch and sucrose metabolism)	GO:0004553(hydrolase activity, hydrolyzing O-glycosyl compounds);GO:0005975(carbohydrate metabolic process);GO:0008152(metabolic process);GO:0016020(membrane);GO:0016021(integral component of membrane);GO:0016787(hydrolase activity);GO:0016798(hydrolase activity, acting on glycosyl bonds);GO:0016798(hydrolase activity, acting on glycosyl bonds)
HORVU4Hr1G072480	blue copper binding protein	1.13729	0.190075	5.53306	1.80576e-11	6.8892	5.58979e-18	3.4657	4.5382e-16	6.92643	1.67493e-20	8.76726	6.42245e-51	NA	GO:0009055(electron transfer activity);GO:0016020(membrane);GO:0016021(integral component of membrane);GO:0022900(electron transport chain)
HORVU1Hr1G068380	BRASSINOSTEROID INSENSITIVE 1-associated receptor kinase 1-like	13.2152	1	11.9099	1	11.2957	1	16.1024	1.76219e-28	14.5149	1.78585e-12	13.841	5.50837e-12	04016(MAPK signaling pathway - plant);04075(Plant hormone signal transduction);04626(Plant-pathogen interaction);04626(Plant-pathogen interaction)	GO:0005515(protein binding);GO:0016020(membrane);GO:0016021(integral component of membrane);GO:0016021(integral component of membrane)
HORVU2Hr1G002230	brassinosteroid-6-oxidase	4.45623	7.38783e-39	3.24915	2.47837e-12	1.27174	0.00515458	5.76142	2.17736e-50	4.44042	5.77171e-16	1.80761	0.0030669	00905(Brassinosteroid biosynthesis);00905(Brassinosteroid biosynthesis)	NA
HORVU3Hr1G049060	Ca2+/H+-exchanging protein	-1.03683	3.63461e-06	-0.604613	0.0476486	-0.263566	0.489948	2.44465	7.99921e-11	2.74094	5.65942e-11	2.31195	2.30091e-09	NA	GO:0005773(vacuole);GO:0005774(vacuolar membrane);GO:0006811(ion transport);GO:0006812(cation transport);GO:0006816(calcium ion transport);GO:0008324(cation transmembrane transporter activity);GO:0015297(antiporter activity);GO:0015369(calcium:proton antiporter activity);GO:0016020(membrane);GO:0016021(integral component of membrane);GO:0055085(transmembrane transport);GO:0070588(calcium ion tran…
HORVU4Hr1G082790	calcium-dependent protein kinase	0.580172	0.303384	1.01286	0.0139813	1.39192	1.2939e-05	1.00892	0.00173529	1.88521	2.44809e-08	2.08898	1.73778e-10	04626(Plant-pathogen interaction);04626(Plant-pathogen interaction)	GO:0000166(nucleotide binding);GO:0004672(protein kinase activity);GO:0004674(protein serine/threonine kinase activity);GO:0005509(calcium ion binding);GO:0005524(ATP binding);GO:0005829(cytosol);GO:0005886(plasma membrane);GO:0006468(protein phosphorylation);GO:0009409(response to cold);GO:0016301(kinase activity);GO:0016310(phosphorylation);GO:0016310(phosphorylation)
HORVU5Hr1G018160	calcium-transporting ATPase 1, plasma membrane-type	1.85914	5.51833e-08	1.14559	0.00490612	1.1431	0.000524877	2.00727	2.70975e-09	1.73049	3.8275e-06	1.24868	0.000246999	NA	GO:0000166(nucleotide binding);GO:0005388(calcium-transporting ATPase activity);GO:0005516(calmodulin binding);GO:0005524(ATP binding);GO:0006811(ion transport);GO:0006816(calcium ion transport);GO:0016020(membrane);GO:0016021(integral component of membrane);GO:0070588(calcium ion transmembrane transport);GO:0099132(ATP hydrolysis coupled cation transmembrane transport);GO:0099132(ATP hydrolysis …
HORVU7Hr1G052560	calcium-transporting ATPase 8, plasma membrane-type-like isoform X2	1.1389	0.00114145	1.31159	0.000693034	0.932074	0.00362781	1.79209	4.94383e-10	2.31639	3.03906e-11	1.52699	1.05397e-07	NA	GO:0000166(nucleotide binding);GO:0005388(calcium-transporting ATPase activity);GO:0005516(calmodulin binding);GO:0005524(ATP binding);GO:0006811(ion transport);GO:0006816(calcium ion transport);GO:0016020(membrane);GO:0016021(integral component of membrane);GO:0070588(calcium ion transmembrane transport);GO:0099132(ATP hydrolysis coupled cation transmembrane transport);GO:0099132(ATP hydrolysis …
HORVU3Hr1G061700	callose synthase 12-like	0.684935	0.140979	1.14303	0.00472314	1.30254	3.3533e-05	1.35453	6.88182e-06	2.14969	9.49396e-09	2.45441	3.20184e-12	NA	GO:0000148(1,3-beta-D-glucan synthase complex);GO:0003843(1,3-beta-D-glucan synthase activity);GO:0006075((1->3)-beta-D-glucan biosynthetic process);GO:0016020(membrane);GO:0016021(integral component of membrane);GO:0016021(integral component of membrane)
HORVU4Hr1G082910	callose synthase 3-like isoform X2	1.6717	4.99106e-07	1.49914	0.000316789	0.963286	0.00414065	1.98453	2.66336e-09	2.49064	5.60692e-10	1.80239	7.34739e-07	NA	GO:0000148(1,3-beta-D-glucan synthase complex);GO:0003843(1,3-beta-D-glucan synthase activity);GO:0006075((1->3)-beta-D-glucan biosynthetic process);GO:0016020(membrane);GO:0016021(integral component of membrane);GO:0016021(integral component of membrane)
HORVU1Hr1G094160	calmodulin-like protein 3	11.8378	1	15.5271	1.07999e-12	13.3292	1	6.01318	1.55368e-08	7.723	1.02571e-12	7.46095	4.46459e-10	04016(MAPK signaling pathway - plant);04070(Phosphatidylinositol signaling system);04626(Plant-pathogen interaction)	GO:0005509(calcium ion binding)
HORVU6Hr1G008640	Catalase isozyme 2	2.47438	2.887e-08	1.48939	0.0118408	-5.39025	1.21111e-14	5.38835	3.21939e-29	3.92809	8.12636e-12	5.04617	4.99892e-05	00630(Glyoxylate and dicarboxylate metabolism);00380(Tryptophan metabolism);04016(MAPK signaling pathway - plant);04146(Peroxisome);04146(Peroxisome)	GO:0004096(catalase activity);GO:0004601(peroxidase activity);GO:0005777(peroxisome);GO:0006979(response to oxidative stress);GO:0009514(glyoxysome);GO:0016491(oxidoreductase activity);GO:0020037(heme binding);GO:0042744(hydrogen peroxide catabolic process);GO:0046872(metal ion binding);GO:0055114(oxidation-reduction process);GO:0098869(cellular oxidant detoxification);GO:0098869(cellular oxidant…
HORVU6Hr1G025940	CBL-interacting protein kinase 26-like isoform X1	2.08736	0.00530401	3.47182	2.77448e-07	4.2332	3.09969e-14	2.18182	0.000176813	3.06611	8.31303e-07	2.84454	9.7151e-08	NA	GO:0000166(nucleotide binding);GO:0004672(protein kinase activity);GO:0004674(protein serine/threonine kinase activity);GO:0005524(ATP binding);GO:0006468(protein phosphorylation);GO:0007165(signal transduction);GO:0016301(kinase activity);GO:0016310(phosphorylation);GO:0016740(transferase activity);GO:0016740(transferase activity)
HORVU5Hr1G074370	cell division cycle 20.2, cofactor of APC complex-like	0.450803	0.61228	-1.03263	0.00855016	-1.70198	6.41807e-05	-1.36248	8.99414e-10	-3.02649	2.53421e-13	-3.10492	1.12426e-09	04120(Ubiquitin mediated proteolysis);04120(Ubiquitin mediated proteolysis)	GO:0005515(protein binding);GO:0010997(anaphase-promoting complex binding);GO:0097027(ubiquitin-protein transferase activator activity);GO:1904668(positive regulation of ubiquitin protein ligase activity);GO:1904668(positive regulation of ubiquitin protein ligase activity)
HORVU4Hr1G085480	cell number regulator 2-like	-1.15273	0.0329966	4.33228	7.08749e-09	5.23729	2.51995e-12	2.79941	0.000308544	7.03893	5.5493e-15	6.54151	3.91172e-16	NA	GO:0016020(membrane);GO:0016021(integral component of membrane);GO:0016021(integral component of membrane)
HORVU7Hr1G075970	cellulase	2.63825	8.35749e-05	0.239562	0.966534	-1.0109	1	2.73952	5.53547e-10	-4.03214	1.06966e-07	-4.80626	2.83876e-06	00500(Starch and sucrose metabolism);00500(Starch and sucrose metabolism)	GO:0000272(polysaccharide catabolic process);GO:0003824(catalytic activity);GO:0004553(hydrolase activity, hydrolyzing O-glycosyl compounds);GO:0005975(carbohydrate metabolic process);GO:0008152(metabolic process);GO:0008810(cellulase activity);GO:0016787(hydrolase activity);GO:0016798(hydrolase activity, acting on glycosyl bonds);GO:0030245(cellulose catabolic process);GO:0030245(cellulose catab…
HORVU7Hr1G070010	cellulose synthase-like CslF6	-0.831572	0.00032325	-0.819647	0.0152194	0.157678	0.609098	1.1308	0.000370936	1.76606	2.02606e-05	1.81296	2.03128e-07	NA	GO:0016020(membrane);GO:0016021(integral component of membrane);GO:0016740(transferase activity);GO:0016757(transferase activity, transferring glycosyl groups);GO:0016760(cellulose synthase (UDP-forming) activity);GO:0030244(cellulose biosynthetic process);GO:0071555(cell wall organization);GO:0071555(cell wall organization)
HORVU2Hr1G074960	cellulose synthase-like protein H1	1.43555	0.146041	4.1028	4.56244e-07	3.90314	8.68905e-05	3.21032	6.64094e-06	5.8911	7.83144e-18	5.11124	5.78364e-08	NA	GO:0016020(membrane);GO:0016021(integral component of membrane);GO:0016740(transferase activity);GO:0016757(transferase activity, transferring glycosyl groups);GO:0016760(cellulose synthase (UDP-forming) activity);GO:0030244(cellulose biosynthetic process);GO:0071555(cell wall organization);GO:0071555(cell wall organization)
HORVU1Hr1G045870	chaperone protein dnaJ 20, chloroplastic-like	-0.0855749	0.579878	0.181419	0.959196	1.18112	0.13925	2.18388	0.00214171	2.61875	0.00117673	4.53728	4.58069e-15	NA	NA
HORVU6Hr1G033160	chlorophyll a-b binding protein 8, chloroplastic	0.782207	0.199519	0.579294	0.326011	0.381118	0.290811	-1.82468	2.94929e-05	-1.86151	0.00119911	-3.32104	0.000298753	00196(Photosynthesis - antenna proteins);00900(Terpenoid backbone biosynthesis);00900(Terpenoid backbone biosynthesis)	GO:0001525(angiogenesis);GO:0009507(chloroplast);GO:0009522(photosystem I);GO:0009523(photosystem II);GO:0009535(chloroplast thylakoid membrane);GO:0009536(plastid);GO:0009579(thylakoid);GO:0009765(photosynthesis, light harvesting);GO:0015979(photosynthesis);GO:0016020(membrane);GO:0016021(integral component of membrane);GO:0016168(chlorophyll binding);GO:0016765(transferase activity, transferrin…
HORVU2Hr1G040780	Chlorophyll a-b binding protein of LHCII type III, chloroplastic; Short=CAB; Flags: Precursor	-2.07211	1	-1.9645	1	-11.4659	1	-2.46941	0.00041498	-6.03387	3.16315e-08	-3.17892	0.00235139	00196(Photosynthesis - antenna proteins);00196(Photosynthesis - antenna proteins)	GO:0009507(chloroplast);GO:0009522(photosystem I);GO:0009523(photosystem II);GO:0009535(chloroplast thylakoid membrane);GO:0009536(plastid);GO:0009579(thylakoid);GO:0009765(photosynthesis, light harvesting);GO:0015979(photosynthesis);GO:0016020(membrane);GO:0016021(integral component of membrane);GO:0016168(chlorophyll binding);GO:0018298(protein-chromophore linkage);GO:0046872(metal ion binding)…
HORVU2Hr1G106880	chloroplast lipocalin	-1.6513	0.00010993	-2.93279	0.00593084	-3.7124	7.66064e-06	-1.56985	6.20672e-05	-3.37262	6.33958e-08	-4.95786	1.81231e-09	NA	GO:0036094(small molecule binding);GO:0036094(small molecule binding)
HORVU3Hr1G056960	chloroplast uroporphyrinogen III methyltransferase precursor	1.51265	0.0259186	3.13838	1.3195e-06	2.82635	2.2836e-06	3.01258	1.58196e-17	3.98141	2.55767e-24	3.99409	1.14121e-24	00860(Porphyrin and chlorophyll metabolism);00860(Porphyrin and chlorophyll metabolism)	GO:0004851(uroporphyrin-III C-methyltransferase activity);GO:0008168(methyltransferase activity);GO:0009236(cobalamin biosynthetic process);GO:0009507(chloroplast);GO:0016740(transferase activity);GO:0019354(siroheme biosynthetic process);GO:0032259(methylation);GO:0043115(precorrin-2 dehydrogenase activity);GO:0051266(sirohydrochlorin ferrochelatase activity);GO:0051287(NAD binding);GO:0055114(o…
HORVU1Hr1G012060	CI2E	-2.36769	1	-1.57731	0.221114	-4.76562	1	-4.01693	2.68169e-06	-14.683	1.04041e-12	-14.683	3.79405e-11	NA	GO:0004867(serine-type endopeptidase inhibitor activity);GO:0009611(response to wounding);GO:0010951(negative regulation of endopeptidase activity);GO:0010951(negative regulation of endopeptidase activity)
HORVU2Hr1G059780	CST complex subunit TEN1-like	-0.0348385	0.480563	-0.782885	0.155028	-0.723615	0.285361	-1.11917	0.000267488	-2.21079	2.38784e-06	-2.16761	0.000375701	NA	GO:0003697(single-stranded DNA binding);GO:1990879(CST complex);GO:1990879(CST complex)
HORVU3Hr1G078680	cystatin Hv-CPI2	1.62728	3.36201e-05	0.638952	0.349657	0.047522	0.814087	4.47709	2.22626e-37	4.13635	1.49869e-21	3.18795	1.73576e-13	NA	GO:0004869(cysteine-type endopeptidase inhibitor activity);GO:0010466(negative regulation of peptidase activity);GO:0010951(negative regulation of endopeptidase activity);GO:0030414(peptidase inhibitor activity)
HORVU3Hr1G091920	Cysteine proteinase EP-B 2; Flags: Precursor	9.92785	5.88794e-21	6.29244	4.24709e-06	-0.125883	1	6.97043	3.47433e-42	2.38212	0.000594353	-5.22216	2.6586e-05	NA	GO:0006508(proteolysis);GO:0008233(peptidase activity);GO:0008234(cysteine-type peptidase activity);GO:0016787(hydrolase activity);GO:0016787(hydrolase activity)
HORVU6Hr1G088980	cysteine-rich receptor-like protein kinase 10	10.5916	1	12.3212	7.902e-09	9.43505	1	6.7128	4.82475e-17	9.62475	3.73254e-34	9.21551	4.70673e-34	NA	GO:0000166(nucleotide binding);GO:0004672(protein kinase activity);GO:0004674(protein serine/threonine kinase activity);GO:0004713(protein tyrosine kinase activity);GO:0005524(ATP binding);GO:0006468(protein phosphorylation);GO:0016020(membrane);GO:0016021(integral component of membrane);GO:0018108(peptidyl-tyrosine phosphorylation);GO:0018108(peptidyl-tyrosine phosphorylation)
HORVU2Hr1G044270	cysteine-rich receptor-like protein kinase 10 isoform X2	-0.0773326	0.292207	0.287984	0.711109	-1.49775	0.00961982	2.09439	2.41213e-07	1.60642	0.00190926	2.0184	5.76431e-06	NA	GO:0000166(nucleotide binding);GO:0004672(protein kinase activity);GO:0004674(protein serine/threonine kinase activity);GO:0005524(ATP binding);GO:0006468(protein phosphorylation);GO:0016020(membrane);GO:0016021(integral component of membrane);GO:0016021(integral component of membrane)
HORVU4Hr1G085990	cysteine-rich repeat secretory protein 38-like	5.17681	1	6.3791	1	6.80365	1.20151e-09	6.0417	3.8521e-08	6.58267	2.05137e-07	6.54603	1.04609e-08	NA	NA
HORVU7Hr1G100040	cytochrome B5-like	-0.682164	0.026117	-2.40222	0.000237188	-2.90877	7.30104e-06	-1.88674	4.10046e-07	-2.98426	3.38945e-07	-4.34252	2.9711e-10	00910(Nitrogen metabolism);00910(Nitrogen metabolism)	GO:0016020(membrane);GO:0016021(integral component of membrane);GO:0020037(heme binding);GO:0046872(metal ion binding);GO:0046872(metal ion binding)
HORVU2Hr1G022080	cytochrome P450 709B2-like	1.74029	2.49327e-07	1.70876	1.82977e-05	0.504808	0.142921	3.22474	5.44998e-23	3.21594	7.19852e-11	2.39437	6.27191e-11	NA	GO:0004497(monooxygenase activity);GO:0005506(iron ion binding);GO:0016491(oxidoreductase activity);GO:0016705(oxidoreductase activity, acting on paired donors, with incorporation or reduction of molecular oxygen);GO:0020037(heme binding);GO:0046872(metal ion binding);GO:0055114(oxidation-reduction process);GO:0055114(oxidation-reduction process)
HORVU5Hr1G061950	cytochrome P450 71A1-like	1.8097	0.0666995	6.9502	1.06805e-17	6.6582	2.03183e-26	5.03007	6.20599e-09	6.12899	1.61133e-11	4.59874	4.63807e-08	00905(Brassinosteroid biosynthesis);00905(Brassinosteroid biosynthesis)	GO:0004497(monooxygenase activity);GO:0005506(iron ion binding);GO:0016020(membrane);GO:0016021(integral component of membrane);GO:0016491(oxidoreductase activity);GO:0016705(oxidoreductase activity, acting on paired donors, with incorporation or reduction of molecular oxygen);GO:0020037(heme binding);GO:0046872(metal ion binding);GO:0055114(oxidation-reduction process);GO:0055114(oxidation-reduc…
HORVU5Hr1G061930	cytochrome P450 71A1-like	2.26133	1	8.37121	1.85387e-13	8.14862	3.24678e-22	2.632	0.00108582	4.72881	2.30294e-10	3.32004	6.04744e-06	00905(Brassinosteroid biosynthesis);00905(Brassinosteroid biosynthesis)	GO:0004497(monooxygenase activity);GO:0005506(iron ion binding);GO:0016020(membrane);GO:0016021(integral component of membrane);GO:0016491(oxidoreductase activity);GO:0016705(oxidoreductase activity, acting on paired donors, with incorporation or reduction of molecular oxygen);GO:0020037(heme binding);GO:0046872(metal ion binding);GO:0055114(oxidation-reduction process);GO:0055114(oxidation-reduc…
HORVU3Hr1G056100	cytochrome P450 72A15	-4.27787	1	5.87738	4.83029e-13	5.97867	3.58149e-20	4.8934	3.63585e-07	8.54985	2.20591e-18	8.35118	4.85643e-30	NA	GO:0004497(monooxygenase activity);GO:0005506(iron ion binding);GO:0016491(oxidoreductase activity);GO:0016705(oxidoreductase activity, acting on paired donors, with incorporation or reduction of molecular oxygen);GO:0020037(heme binding);GO:0046872(metal ion binding);GO:0055114(oxidation-reduction process);GO:0055114(oxidation-reduction process)
HORVU3Hr1G056110	cytochrome P450 72A15-like	0.120789	0.764814	5.40007	2.55046e-11	6.90233	2.29794e-24	1.93518	0.00257725	5.14409	7.45906e-20	8.10821	5.63472e-33	NA	GO:0004497(monooxygenase activity);GO:0005506(iron ion binding);GO:0016491(oxidoreductase activity);GO:0016705(oxidoreductase activity, acting on paired donors, with incorporation or reduction of molecular oxygen);GO:0020037(heme binding);GO:0046872(metal ion binding);GO:0055114(oxidation-reduction process);GO:0055114(oxidation-reduction process)
HORVU1Hr1G061090	cytochrome P450 734A1-like	1.65895	0.000158637	1.26506	0.0142098	0.955945	0.0192344	1.96717	3.18831e-07	1.77963	0.000173189	1.85851	1.12573e-06	00905(Brassinosteroid biosynthesis);00905(Brassinosteroid biosynthesis)	GO:0005506(iron ion binding);GO:0016020(membrane);GO:0016021(integral component of membrane);GO:0016705(oxidoreductase activity, acting on paired donors, with incorporation or reduction of molecular oxygen);GO:0020037(heme binding);GO:0055114(oxidation-reduction process);GO:0055114(oxidation-reduction process)
HORVU2Hr1G007990	cytosolic sulfotransferase 5-like	-1.5642	0.00519328	-3.7092	0.000412204	-13.0655	1.62196e-11	-2.57409	6.85373e-06	-4.66546	5.53527e-09	-4.76323	4.03604e-06	NA	GO:0008146(sulfotransferase activity);GO:0016740(transferase activity)
HORVU4Hr1G025620	DDT domain-containing protein PTM-like	0.997416	0.00698608	1.26656	0.000709934	0.998121	0.00181231	1.38406	1.54484e-05	1.85528	4.58727e-07	1.83638	1.17007e-08	NA	GO:0046872(metal ion binding);GO:0046872(metal ion binding)
HORVU7Hr1G037690	Defensin Tk-AMP-D5	2.10881	1	0.627264	1	-0.929544	1	-2.18793	1.21901e-07	-2.48209	7.13824e-06	-16.9357	3.37983e-20	NA	GO:0006952(defense response)
HORVU5Hr1G038070	Dihydrolipoyllysine-residue acetyltransferase component of pyruvate dehydrogenase complex	-0.924325	2.71344e-06	-1.75429	4.47764e-07	-2.25698	7.734e-10	-1.14588	5.72562e-10	-1.672	1.06793e-07	-2.76299	4.25424e-12	00010(Glycolysis / Gluconeogenesis);00020(Citrate cycle (TCA cycle));00620(Pyruvate metabolism);03010(Ribosome);03010(Ribosome)	GO:0016746(transferase activity, transferring acyl groups);GO:0016746(transferase activity, transferring acyl groups)
HORVU3Hr1G006430	disease resistance protein RGA2 isoform X2	0.781829	0.155756	1.15049	0.00924258	1.55309	9.0542e-06	1.59723	0.000265487	1.96037	7.34675e-05	1.59342	3.2023e-05	NA	GO:0043531(ADP binding);GO:0043531(ADP binding)
HORVU1Hr1G068200	disease resistance protein RGA2-like	1.23778	0.0414976	3.59637	4.38246e-08	2.99499	1.10671e-09	3.22171	4.81201e-05	4.73082	1.26296e-10	2.90459	0.000369941	NA	GO:0043531(ADP binding);GO:0043531(ADP binding)
HORVU1Hr1G085960	disease resistance protein RGA2-like isoform X6	0.975309	0.0437594	2.07695	1.87898e-06	2.61055	1.07875e-12	3.62769	2.18926e-12	5.81713	1.22913e-28	5.45712	1.47856e-25	NA	GO:0005515(protein binding);GO:0043531(ADP binding);GO:0043531(ADP binding)
HORVU5Hr1G079080	disease resistance protein RPM1	-7.28398	1	-7.28398	1	-7.28398	1	3.00173	8.72977e-12	3.4319	1.40789e-11	3.09808	6.73375e-12	04626(Plant-pathogen interaction)	GO:0043531(ADP binding)
HORVU6Hr1G090470	Disease resistance protein RPM1	7.96393	1	8.22781	1	7.69534	1	5.30349	1.06512e-21	5.38487	3.71285e-15	3.63233	9.29642e-07	04626(Plant-pathogen interaction);04626(Plant-pathogen interaction)	GO:0043531(ADP binding);GO:0043531(ADP binding)
HORVU7Hr1G028930	Disease resistance protein RPM1	0	1	0	1	3.75027	1	2.09447	3.32074e-07	1.93572	4.54224e-05	1.20006	0.00236514	04626(Plant-pathogen interaction);04626(Plant-pathogen interaction)	NA
HORVU3Hr1G001250	Disease resistance protein RPM1	1.33342	0.0198614	0.89914	0.18153	1.18772	0.00828837	3.72778	1.24868e-06	3.50789	0.000143362	3.31292	0.00050119	04626(Plant-pathogen interaction);04626(Plant-pathogen interaction)	GO:0005623(cell);GO:0043531(ADP binding);GO:0045454(cell redox homeostasis);GO:0045454(cell redox homeostasis)
HORVU3Hr1G014890	disease resistance protein RPM1-like	0.935077	0.0231081	2.27425	2.33238e-07	2.48818	2.64877e-11	2.34131	4.02166e-14	3.50007	5.42496e-19	3.26734	9.99394e-16	04626(Plant-pathogen interaction);04626(Plant-pathogen interaction)	GO:0043531(ADP binding);GO:0043531(ADP binding)
HORVU5Hr1G062610	disease resistance protein RPP13-like	2.10489	0.0133262	3.45865	7.34164e-05	2.68012	0.000261491	4.65638	9.02219e-07	5.20406	1.68922e-07	5.1461	1.1422e-06	04626(Plant-pathogen interaction);04626(Plant-pathogen interaction)	GO:0043531(ADP binding);GO:0043531(ADP binding)
HORVU2Hr1G071670	DNA cross-link repair protein SNM1	1.1137	0.0231824	1.3161	0.00773316	1.36413	0.000571347	1.73555	9.74832e-05	2.1374	5.29994e-05	2.05965	2.87857e-06	NA	GO:0006281(DNA repair);GO:0016020(membrane);GO:0016021(integral component of membrane);GO:0016021(integral component of membrane)
HORVU7Hr1G037130	DNA-directed RNA polymerase II subunit 1-like	0.926065	0.103616	1.22729	0.0280499	0.665339	0.0998329	1.98296	3.71628e-07	2.53978	4.40192e-09	1.99184	2.03895e-07	00230(Purine metabolism);00240(Pyrimidine metabolism);03020(RNA polymerase);03020(RNA polymerase)	GO:0003677(DNA binding);GO:0003899(DNA-directed 5'-3' RNA polymerase activity);GO:0006351(transcription, DNA-templated);GO:0016740(transferase activity);GO:0016779(nucleotidyltransferase activity);GO:0016779(nucleotidyltransferase activity)
HORVU1Hr1G025160	DNA-directed RNA polymerase III subunit 1	-3.5222	2.57505e-07	-11.6736	1.36127e-11	-0.726191	0.302148	-11.7462	7.35391e-17	-5.08386	2.43379e-07	-6.8805	3.42516e-09	00230(Purine metabolism);00240(Pyrimidine metabolism);03020(RNA polymerase);03020(RNA polymerase)	GO:0003677(DNA binding);GO:0003899(DNA-directed 5'-3' RNA polymerase activity);GO:0006351(transcription, DNA-templated);GO:0016740(transferase activity);GO:0016779(nucleotidyltransferase activity);GO:0016779(nucleotidyltransferase activity)
HORVU1Hr1G022720	DNA-directed RNA polymerase III subunit RPC4	1.56785	9.34019e-06	1.65218	3.70395e-05	0.836401	0.0113225	1.475	2.25985e-05	2.02386	1.73299e-07	1.18657	0.000170453	00230(Purine metabolism);00240(Pyrimidine metabolism);03020(RNA polymerase);03020(RNA polymerase)	GO:0003677(DNA binding);GO:0003899(DNA-directed 5'-3' RNA polymerase activity);GO:0005666(RNA polymerase III complex);GO:0006383(transcription by RNA polymerase III);GO:0006383(transcription by RNA polymerase III)
HORVU3Hr1G090350	DNA-directed RNA polymerase III subunit RPC4-like isoform X1	-0.890648	5.45859e-06	-1.41215	3.33523e-05	-0.818893	0.0311143	-1.28954	6.48713e-11	-2.23736	6.53543e-12	-2.15418	4.07191e-07	00230(Purine metabolism);00240(Pyrimidine metabolism);03020(RNA polymerase);03020(RNA polymerase)	GO:0003677(DNA binding);GO:0003899(DNA-directed 5'-3' RNA polymerase activity);GO:0005666(RNA polymerase III complex);GO:0006383(transcription by RNA polymerase III);GO:0006383(transcription by RNA polymerase III)
HORVU0Hr1G003000	E3 ubiquitin-protein ligase EL5-like	2.02525	0.0510306	8.75252	1.51564e-48	8.10276	1.02882e-31	2.49116	2.01e-05	8.42987	7.14596e-22	7.91682	6.44656e-11	NA	GO:0008146(sulfotransferase activity);GO:0016740(transferase activity);GO:0016740(transferase activity)
HORVU4Hr1G025400	E3 ubiquitin-protein ligase EL5-like	-2.87273	3.69844e-07	-1.12058	0.151104	-2.19555	0.00273358	-2.88868	8.05273e-09	-3.73193	4.63805e-07	-3.83307	0.000504952	NA	GO:0016020(membrane);GO:0016021(integral component of membrane);GO:0016021(integral component of membrane)
HORVU7Hr1G021160	E3 ubiquitin-protein ligase SINA-like 10	-11.0984	1	-11.0984	1	-11.0984	1	-12.6347	7.76326e-11	-5.63025	8.1755e-07	-4.99856	0.000111272	04120(Ubiquitin mediated proteolysis);04120(Ubiquitin mediated proteolysis)	GO:0005515(protein binding);GO:0005634(nucleus);GO:0006511(ubiquitin-dependent protein catabolic process);GO:0007275(multicellular organism development);GO:0008270(zinc ion binding);GO:0016567(protein ubiquitination);GO:0046872(metal ion binding);GO:0046872(metal ion binding)
HORVU5Hr1G072400	E3 ubiquitin-protein ligase SINA-like 4	-2.26439	0.000736316	-2.19798	0.00680261	-2.89564	0.000884996	-1.98506	1.6853e-08	-3.36942	2.3354e-10	-2.84184	1.30357e-06	04120(Ubiquitin mediated proteolysis)	GO:0005515(protein binding);GO:0046872(metal ion binding)
HORVU3Hr1G086230	elicitor-responsive protein 1-like	3.52197	1	8.1956	4.74762e-12	7.46228	1.37925e-11	3.82345	3.80756e-05	7.73345	1.59075e-17	8.1632	3.70732e-23	00010(Glycolysis / Gluconeogenesis);00051(Fructose and mannose metabolism);00562(Inositol phosphate metabolism);00710(Carbon fixation in photosynthetic organisms);00710(Carbon fixation in photosynthetic organisms)	NA
HORVU1Hr1G062080	endo-1,3;1,4-beta-D-glucanase-like	1.02412	0.00830764	2.39318	1.39734e-09	2.47765	1.94177e-12	1.13028	0.00120425	2.79327	5.68956e-15	3.11721	2.44883e-16	00010(Glycolysis / Gluconeogenesis);00051(Fructose and mannose metabolism);00052(Galactose metabolism);00500(Starch and sucrose metabolism);00520(Amino sugar and nucleotide sugar metabolism);00524(Neomycin, kanamycin and gentamicin biosynthesis);00524(Neomycin, kanamycin and gentamicin biosynthesis)	GO:0016787(hydrolase activity);GO:0016787(hydrolase activity)
HORVU4Hr1G010650	endoplasmic reticulum oxidoreductin-1-like	0.0294578	0.289817	-0.27525	0.34347	-0.240697	0.712801	1.54076	4.6929e-06	2.57898	1.06759e-11	2.50491	1.83939e-11	04141(Protein processing in endoplasmic reticulum);04141(Protein processing in endoplasmic reticulum)	GO:0003756(protein disulfide isomerase activity);GO:0005783(endoplasmic reticulum);GO:0005789(endoplasmic reticulum membrane);GO:0016020(membrane);GO:0016021(integral component of membrane);GO:0016671(oxidoreductase activity, acting on a sulfur group of donors, disulfide as acceptor);GO:0051604(protein maturation);GO:0055114(oxidation-reduction process);GO:0055114(oxidation-reduction process)
HORVU2Hr1G061260	EPIDERMAL PATTERNING FACTOR-like protein 2	-1.25653	0.00884621	-4.60015	7.34487e-06	-4.93478	1.0365e-05	-2.68591	6.67326e-08	-3.38826	5.97671e-07	-15.225	8.4718e-16	NA	GO:0010374(stomatal complex development);GO:0010374(stomatal complex development)
HORVU1Hr1G060060	ethylene-responsive transcription factor ABI4-like	-0.957794	0.00257982	-2.11259	6.29998e-05	-3.61419	3.47122e-05	-1.32036	8.53417e-06	-2.97911	5.32773e-09	-6.3365	3.37093e-19	NA	GO:0003677(DNA binding);GO:0003700(DNA-binding transcription factor activity);GO:0005634(nucleus);GO:0006351(transcription, DNA-templated);GO:0006355(regulation of transcription, DNA-templated);GO:0009738(abscisic acid-activated signaling pathway);GO:0044212(transcription regulatory region DNA binding);GO:0048316(seed development)
HORVU2Hr1G098250	ethylene-responsive transcription factor ERF105-like	1.73897	0.0624683	2.18848	0.017382	0.553561	0.458964	6.01638	6.57315e-14	4.66928	2.38619e-05	4.22656	3.36404e-05	NA	NA
HORVU4Hr1G077280	ethylene-responsive transcription factor RAP2-12-like	4.33845	8.05666e-19	3.05037	7.47176e-06	-0.438593	0.844024	2.31082	0.00177048	5.36646	2.64768e-11	4.54336	1.7056e-13	NA	GO:0003677(DNA binding);GO:0003700(DNA-binding transcription factor activity);GO:0005634(nucleus);GO:0006351(transcription, DNA-templated);GO:0006355(regulation of transcription, DNA-templated)
HORVU7Hr1G093680	expansin-A16	2.20257	2.09309e-06	2.3043	1.24956e-05	1.26435	0.00916169	2.42384	3.49198e-07	2.23419	0.000136502	1.79863	0.00024647	NA	GO:0005576(extracellular region);GO:0005618(cell wall);GO:0006949(syncytium formation);GO:0009664(plant-type cell wall organization);GO:0016020(membrane);GO:0071555(cell wall organization);GO:0080167(response to karrikin);GO:0080167(response to karrikin)
HORVU2Hr1G031690	exportin-T	0.308549	0.969944	0.339997	0.4953	0.465491	0.105392	1.42739	2.35815e-05	1.57965	0.000106443	1.25193	0.000135578	03013(RNA transport);03013(RNA transport)	GO:0000049(tRNA binding);GO:0005623(cell);GO:0006409(tRNA export from nucleus);GO:0008536(Ran GTPase binding);GO:0016020(membrane);GO:0016021(integral component of membrane);GO:0071528(tRNA re-export from nucleus);GO:0071528(tRNA re-export from nucleus)
HORVU1Hr1G021990	factor of DNA methylation 1-like	-0.150398	0.460494	-0.709537	0.283928	1.50555	0.0117593	-2.89638	1.52235e-08	-2.6162	9.18029e-05	-2.91618	0.00120316	NA	GO:0031047(gene silencing by RNA);GO:0031047(gene silencing by RNA)
HORVU2Hr1G037330	far upstream element-binding protein 1-like isoform X2	-0.771214	0.132229	-3.90301	0.000135028	-14.3487	1.1715e-14	-2.06363	0.000157518	-4.01513	0.000321095	-15.0765	5.3754e-16	NA	GO:0003676(nucleic acid binding);GO:0003723(RNA binding)
HORVU2Hr1G011070	farnesylated protein 1	-1.80554	1.77164e-05	0.0591269	0.84739	0.301867	0.501726	2.42141	1.27129e-08	2.84629	5.81132e-06	3.6303	5.37226e-13	NA	NA
HORVU2Hr1G011060	farnesylated protein 1	-1.57457	0.00329667	0.129389	0.98146	0.261694	0.616249	2.45788	0.000708459	2.78788	0.000406715	3.70113	1.02067e-06	NA	GO:0030001(metal ion transport);GO:0046872(metal ion binding);GO:0046872(metal ion binding)
HORVU7Hr1G072570	F-box protein PP2-B10-like	3.76574	1	6.11726	5.82761e-07	5.8584	2.44991e-06	3.93688	2.07795e-05	4.38119	9.82329e-06	5.40133	2.35056e-09	NA	GO:0005515(protein binding);GO:0005515(protein binding)
HORVU6Hr1G091980	F-box/FBD/LRR-repeat protein At1g13570-like	1.40569	0.0156816	1.49731	0.0149397	1.70969	0.000558604	1.94808	4.01845e-08	1.96074	1.81286e-06	1.04944	0.00250547	NA	GO:0005515(protein binding);GO:0005515(protein binding)
HORVU6Hr1G075590	F-box/kelch-repeat protein At1g74510-like	0.576956	0.424006	2.47266	4.22169e-07	2.66072	9.67282e-11	1.62948	8.355e-08	3.07613	3.9564e-19	3.747	2.67329e-16	NA	GO:0005515(protein binding);GO:0005515(protein binding)
HORVU5Hr1G054060	ferrochelatase	0.686068	0.165548	1.04805	0.00680733	1.04123	0.00124333	1.14854	0.000604398	2.14845	1.39894e-09	2.23953	2.29956e-12	00860(Porphyrin and chlorophyll metabolism);00860(Porphyrin and chlorophyll metabolism)	GO:0004325(ferrochelatase activity);GO:0005739(mitochondrion);GO:0006779(porphyrin-containing compound biosynthetic process);GO:0006783(heme biosynthetic process);GO:0006979(response to oxidative stress);GO:0009507(chloroplast);GO:0009536(plastid);GO:0016020(membrane);GO:0016021(integral component of membrane);GO:0016829(lyase activity);GO:0033014(tetrapyrrole biosynthetic process);GO:0033014(tet…
HORVU3Hr1G089510	formin-like protein 1	-0.831805	0.000110829	-0.560257	0.082502	-0.149493	0.845158	1.07602	0.00104905	1.33472	0.000346442	1.12795	9.9509e-05	04933(AGE-RAGE signaling pathway in diabetic complications);04933(AGE-RAGE signaling pathway in diabetic complications)	GO:0016020(membrane);GO:0016021(integral component of membrane);GO:0016021(integral component of membrane)
HORVU5Hr1G053320	FT-interacting protein 1-like	-3.28578	0.000213828	-2.91313	0.00574323	-0.692191	0.371448	-4.03513	5.38321e-06	-5.7554	5.62076e-07	-3.38478	0.00218146	00270(Cysteine and methionine metabolism);00450(Selenocompound metabolism);00450(Selenocompound metabolism)	GO:0016020(membrane);GO:0016021(integral component of membrane);GO:0016021(integral component of membrane)
HORVU4Hr1G031700	gag-pol polyprotein	-1.76745	0.00124895	-2.63232	0.000170465	-0.945896	0.148742	-3.50165	3.38273e-20	-4.26714	1.45809e-16	-2.23908	0.0017757	NA	GO:0016020(membrane);GO:0016021(integral component of membrane);GO:0016021(integral component of membrane)
HORVU7Hr1G077470	GDP-mannose transporter GONST1-like isoform X1	0.870056	0.224623	1.12757	0.0794771	0.876749	0.0844182	2.62855	5.7123e-05	3.32655	3.39536e-06	2.94894	1.69055e-05	NA	GO:0016020(membrane);GO:0016021(integral component of membrane);GO:0016021(integral component of membrane)
HORVU7Hr1G021310	GDSL esterase/lipase APG isoform X2	-0.615635	0.0500091	-3.49155	6.8372e-10	-5.70037	1.47921e-17	-1.15747	0.000566505	-2.12817	0.000124923	-6.79849	2.42839e-15	00561(Glycerolipid metabolism);00561(Glycerolipid metabolism)	GO:0016788(hydrolase activity, acting on ester bonds);GO:0016788(hydrolase activity, acting on ester bonds)
HORVU0Hr1G009410	GER4a	14.4466	5.46002e-12	13.9948	4.97135e-10	11.1973	1	13.2807	6.50238e-08	15.2755	5.54802e-15	14.849	1.93594e-12	00450(Selenocompound metabolism);00450(Selenocompound metabolism)	GO:0005576(extracellular region);GO:0030145(manganese ion binding);GO:0045735(nutrient reservoir activity);GO:0046872(metal ion binding);GO:0046872(metal ion binding)
HORVU1Hr1G017170	germin-like protein 5-1	0.443264	0.747338	-0.59012	0.355926	-2.03449	0.00340621	-1.4689	0.000369863	-2.60385	7.23497e-05	-6.39654	1.31563e-09	NA	GO:0005576(extracellular region);GO:0016020(membrane);GO:0016021(integral component of membrane);GO:0030145(manganese ion binding);GO:0045735(nutrient reservoir activity);GO:0046872(metal ion binding);GO:0046872(metal ion binding)
HORVU4Hr1G067180	glucan endo-1,3-beta-glucosidase 3	-0.494898	0.0016525	-2.195	4.45329e-10	-2.97312	1.70194e-17	-1.53259	2.55906e-12	-3.34439	1.36101e-17	-4.67001	3.53675e-27	00500(Starch and sucrose metabolism);00500(Starch and sucrose metabolism)	GO:0004553(hydrolase activity, hydrolyzing O-glycosyl compounds);GO:0005975(carbohydrate metabolic process);GO:0016787(hydrolase activity);GO:0016787(hydrolase activity)
HORVU1Hr1G080510	glucan endo-1,3-beta-glucosidase 8-like isoform X1	2.56692	1	3.60067	3.13696e-05	4.19944	2.52961e-08	4.08661	1.42135e-06	4.24017	3.45521e-06	3.8938	7.84423e-06	00500(Starch and sucrose metabolism);00500(Starch and sucrose metabolism)	GO:0004553(hydrolase activity, hydrolyzing O-glycosyl compounds);GO:0005975(carbohydrate metabolic process);GO:0008152(metabolic process);GO:0016020(membrane);GO:0016021(integral component of membrane);GO:0016787(hydrolase activity);GO:0016798(hydrolase activity, acting on glycosyl bonds);GO:0016798(hydrolase activity, acting on glycosyl bonds)
HORVU5Hr1G010420	glutamate receptor 2.8-like	1.17517	0.164155	1.64863	0.0368151	0.513717	0.354488	2.36921	0.00284633	2.83245	0.000193737	2.98939	0.00021306	NA	GO:0004930(G protein-coupled receptor activity);GO:0004970(ionotropic glutamate receptor activity);GO:0006811(ion transport);GO:0007186(G protein-coupled receptor signaling pathway);GO:0016020(membrane);GO:0016021(integral component of membrane);GO:0035235(ionotropic glutamate receptor signaling pathway);GO:0035235(ionotropic glutamate receptor signaling pathway)
HORVU4Hr1G007610	glutamine synthetase isoform GS1_3	0.676758	0.296317	2.02692	1.32633e-06	0.706607	0.135215	1.99229	2.15268e-07	2.52892	2.09727e-05	1.74054	3.90182e-06	00630(Glyoxylate and dicarboxylate metabolism);00910(Nitrogen metabolism);00250(Alanine, aspartate and glutamate metabolism);00220(Arginine biosynthesis);00220(Arginine biosynthesis)	GO:0000166(nucleotide binding);GO:0003824(catalytic activity);GO:0004356(glutamate-ammonia ligase activity);GO:0005524(ATP binding);GO:0006542(glutamine biosynthetic process);GO:0006807(nitrogen compound metabolic process);GO:0016874(ligase activity);GO:0016874(ligase activity)
HORVU7Hr1G054460	glutathione S-transferase T3-like	-8.03664	1	-8.03664	1	0.369521	1	-13.5379	1.02311e-12	-13.5379	9.1188e-11	-13.5379	3.05642e-09	NA	NA
HORVU6Hr1G052420	glycerophosphodiester phosphodiesterase GDPDL4-like isoform X1	0.836719	0.0363734	0.159441	0.938607	0.79631	0.0103794	1.6381	2.7093e-07	1.60624	4.28631e-06	1.53588	9.30099e-07	00564(Glycerophospholipid metabolism);00564(Glycerophospholipid metabolism)	GO:0006629(lipid metabolic process);GO:0008081(phosphoric diester hydrolase activity);GO:0016020(membrane);GO:0016021(integral component of membrane);GO:0016021(integral component of membrane)
HORVU7Hr1G100490	glycosyltransferase	0.223209	0.744777	0.344668	0.577015	0.754351	0.0242123	1.19266	0.00243237	1.66905	3.43508e-05	1.9981	4.08864e-08	NA	GO:0000139(Golgi membrane);GO:0005794(Golgi apparatus);GO:0015018(galactosylgalactosylxylosylprotein 3-beta-glucuronosyltransferase activity);GO:0016020(membrane);GO:0016021(integral component of membrane);GO:0016740(transferase activity);GO:0071555(cell wall organization);GO:0071555(cell wall organization)
HORVU7Hr1G091140	G-type lectin S-receptor-like serine/threonine-protein kinase At2g19130	14.0551	2.56895e-17	14.227	4.24151e-14	10.9568	1	14.3551	9.41652e-26	14.6081	2.61243e-22	11.6902	1.78645e-09	NA	GO:0000166(nucleotide binding);GO:0004672(protein kinase activity);GO:0004674(protein serine/threonine kinase activity);GO:0005524(ATP binding);GO:0006468(protein phosphorylation);GO:0016020(membrane);GO:0016021(integral component of membrane);GO:0016301(kinase activity);GO:0016310(phosphorylation);GO:0016740(transferase activity);GO:0048544(recognition of pollen);GO:0048544(recognition of pollen)
HORVU7Hr1G105150	G-type lectin S-receptor-like serine/threonine-protein kinase At2g19130	2.81688	1	8.23446	3.57328e-15	8.12388	2.0858e-25	2.78056	0.000452947	5.94706	1.77278e-11	6.98525	1.77359e-22	NA	GO:0000166(nucleotide binding);GO:0004672(protein kinase activity);GO:0004674(protein serine/threonine kinase activity);GO:0005524(ATP binding);GO:0006468(protein phosphorylation);GO:0016301(kinase activity);GO:0016310(phosphorylation);GO:0016740(transferase activity);GO:0048544(recognition of pollen)
HORVU5Hr1G087210	G-type lectin S-receptor-like serine/threonine-protein kinase B120	2.04921	0.0867084	3.84449	0.0016139	3.8689	0.000319383	5.79532	1.15091e-31	4.9901	2.19924e-11	2.73438	0.000119632	04144(Endocytosis);00040(Pentose and glucuronate interconversions);00052(Galactose metabolism);00053(Ascorbate and aldarate metabolism);00520(Amino sugar and nucleotide sugar metabolism);03022(Basal transcription factors);03022(Basal transcription factors)	GO:0000943(retrotransposon nucleocapsid);GO:0004672(protein kinase activity);GO:0004713(protein tyrosine kinase activity);GO:0005524(ATP binding);GO:0006468(protein phosphorylation);GO:0016020(membrane);GO:0016021(integral component of membrane);GO:0018108(peptidyl-tyrosine phosphorylation);GO:0048544(recognition of pollen);GO:0048544(recognition of pollen)
HORVU2Hr1G008390	G-type lectin S-receptor-like serine/threonine-protein kinase LECRK2	1.12008	0.0764744	2.17453	0.000561891	1.06281	0.0607014	2.23361	5.85177e-10	3.80178	7.74946e-18	3.90124	1.62042e-18	NA	GO:0000166(nucleotide binding);GO:0004672(protein kinase activity);GO:0004674(protein serine/threonine kinase activity);GO:0005524(ATP binding);GO:0006468(protein phosphorylation);GO:0016020(membrane);GO:0016021(integral component of membrane);GO:0016301(kinase activity);GO:0016310(phosphorylation);GO:0016740(transferase activity);GO:0016740(transferase activity)
HORVU2Hr1G008640	G-type lectin S-receptor-like serine/threonine-protein kinase LECRK2	0.845335	1	2.47761	1	1.10076	1	3.36822	2.61938e-05	5.18352	4.83895e-09	4.7444	9.15562e-10	NA	NA
HORVU2Hr1G081560	heavy metal-associated isoprenylated plant protein 47-like	1.52461	0.0816044	3.06596	3.94781e-05	3.38067	1.71791e-08	2.81382	1.11057e-05	3.18613	2.73762e-05	4.83556	2.91207e-18	NA	GO:0030001(metal ion transport);GO:0046872(metal ion binding);GO:0046872(metal ion binding)
HORVU5Hr1G028140	heptahelical transmembrane protein 4-like	-2.65589	2.78114e-05	-11.2696	2.024e-10	-1.41573	0.203986	-4.61545	1.863e-05	-4.20392	5.99313e-07	-11.3107	2.0624e-10	NA	GO:0016020(membrane);GO:0016021(integral component of membrane);GO:0016021(integral component of membrane)
HORVU4Hr1G019990	heterogeneous nuclear ribonucleoproteins A1 homolog isoform X1	-0.847258	1.22999e-05	-1.26208	5.81786e-05	-1.01733	0.00438053	-1.89796	2.07469e-17	-2.18705	1.68958e-10	-3.1733	3.24367e-15	03013(RNA transport);03008(Ribosome biogenesis in eukaryotes);03008(Ribosome biogenesis in eukaryotes)	GO:0003676(nucleic acid binding);GO:0016020(membrane);GO:0016021(integral component of membrane);GO:0016021(integral component of membrane)
HORVU1Hr1G056010	Hexose carrier protein HEX6	1.89776	2.44796e-05	1.28751	0.0277222	0.474521	0.258419	2.54882	1.205e-09	2.21254	8.38225e-06	1.68565	7.92753e-05	NA	GO:0005215(transporter activity);GO:0016020(membrane);GO:0016021(integral component of membrane);GO:0022857(transmembrane transporter activity);GO:0055085(transmembrane transport);GO:0055085(transmembrane transport)
HORVU6Hr1G005930	high-affinity nitrate transporter 2.1-like	-9.59821	1	-0.0596501	1	-2.40043	1	-7.90392	4.38809e-18	-5.7804	6.2256e-12	-7.12389	7.89708e-10	00910(Nitrogen metabolism)	GO:0016021(integral component of membrane);GO:0055085(transmembrane transport)
HORVU1Hr1G094450	histone H1.01-like	5.44883	1	7.85671	1.94356e-07	9.3385	2.50293e-19	3.71466	9.56571e-06	3.79776	1.34082e-05	4.89267	3.00269e-09	04141(Protein processing in endoplasmic reticulum);04141(Protein processing in endoplasmic reticulum)	NA
HORVU5Hr1G110680	Histone H2A.1	1.16547	0.000533304	-0.890018	0.00556248	-1.41013	4.55069e-05	1.07752	0.00123058	-1.73126	7.31586e-07	-2.85125	1.51832e-11	NA	GO:0000786(nucleosome);GO:0003677(DNA binding);GO:0005634(nucleus);GO:0005694(chromosome);GO:0046982(protein heterodimerization activity)
HORVU1Hr1G049920	histone H2B.1	0.415199	0.844811	-0.96516	1	-1.08349	1	1.24407	0.000442265	-1.61353	0.000817884	-1.70699	0.000894528	NA	GO:0000786(nucleosome);GO:0003677(DNA binding);GO:0005634(nucleus);GO:0005694(chromosome);GO:0046982(protein heterodimerization activity)
HORVU7Hr1G110130	Histone H2B.10	1.20968	0.00512229	-1.52514	0.00110098	-1.28638	0.00664617	1.06642	0.00246074	-1.85312	4.47111e-05	-3.20135	5.32321e-10	NA	GO:0000786(nucleosome);GO:0003677(DNA binding);GO:0005634(nucleus);GO:0005694(chromosome);GO:0046982(protein heterodimerization activity);GO:0046982(protein heterodimerization activity)
HORVU4Hr1G073130	histone H2B.2-like	1.48518	3.58544e-05	-0.44183	0.179436	-0.90462	0.0352234	1.43275	1.47069e-06	-1.13076	0.00279782	-1.91278	0.000171836	NA	GO:0000786(nucleosome);GO:0003677(DNA binding);GO:0005634(nucleus);GO:0005694(chromosome);GO:0046982(protein heterodimerization activity);GO:0046982(protein heterodimerization activity)
HORVU4Hr1G083750	homeobox-leucine zipper protein ROC8	-0.400362	1	1.33094	1	-6.71094	1	1.82074	7.4188e-06	2.72044	4.7828e-10	1.62376	4.62609e-05	NA	NA
HORVU7Hr1G035230	homeobox-leucine zipper protein ROC8-like	-0.60307	0.0988731	-3.56359	1.02459e-05	-4.0386	0.00244678	-2.13638	3.45777e-05	-12.6517	6.92334e-16	-12.6517	9.987e-14	NA	GO:0003677(DNA binding);GO:0005634(nucleus);GO:0006355(regulation of transcription, DNA-templated);GO:0008289(lipid binding);GO:0043565(sequence-specific DNA binding);GO:0043565(sequence-specific DNA binding)
HORVU5Hr1G000740	hypothetical protein	1.55411	2.36736e-06	1.32888	0.000564034	-0.18351	0.719757	3.13491	1.41806e-27	2.69206	6.11963e-15	1.26457	0.000254054	NA	NA
HORVU6Hr1G013710	hypothetical protein	4.25856	2.65842e-11	3.21678	8.98597e-05	0.078285	1	4.95798	2.90097e-14	5.52618	9.34977e-13	4.45969	5.92334e-08	NA	NA
HORVU6Hr1G011030	hypothetical protein AXG93_725s1110	-1.0354	1	-2.3535	1	-4.60048	1	-3.52303	1.48043e-06	-4.14485	3.78697e-05	-13.5735	2.04327e-10	NA	GO:0000786(nucleosome);GO:0003677(DNA binding);GO:0005634(nucleus);GO:0005694(chromosome);GO:0006334(nucleosome assembly);GO:0046982(protein heterodimerization activity);GO:0046982(protein heterodimerization activity)
HORVU7Hr1G085180	hypothetical protein BRADI_1g37070v3	-0.92266	2.19433e-07	-1.63372	1.6747e-07	-1.626	8.75147e-07	-1.74621	1.36171e-13	-2.05	9.46387e-09	-1.72141	0.000103603	NA	GO:0016020(membrane);GO:0016021(integral component of membrane);GO:0055085(transmembrane transport);GO:0055085(transmembrane transport)
HORVU5Hr1G111210	hypothetical protein BRADI_3g15760v3	2.96608	0.00601776	7.95721	3.22072e-13	8.44331	1.54485e-22	4.44347	0.000302975	7.73303	3.10654e-13	7.87673	4.57579e-20	NA	NA
HORVU7Hr1G115670	hypothetical protein BRADI_3g44485v3	3.62491	7.61196e-10	4.81796	1.8918e-11	1.50659	0.0141656	4.59351	3.24686e-07	3.29132	0.00182716	2.47434	0.00149007	NA	NA
HORVU2Hr1G067700	hypothetical protein BRADI_5g06485v3	1.73873	1	7.25951	4.72429e-14	7.66243	3.44836e-19	3.44143	4.01921e-07	7.0066	1.54819e-19	9.14682	9.98441e-45	NA	GO:0016020(membrane);GO:0016021(integral component of membrane)
HORVU2Hr1G070720	hypothetical protein BRADI_5g08690v3	1.09685	0.0309764	4.00584	9.4167e-11	4.28022	3.36819e-17	1.77655	4.50699e-05	4.43067	1.13528e-28	5.81069	9.93285e-22	00195(Photosynthesis);00195(Photosynthesis)	NA
HORVU2Hr1G090250	hypothetical protein BRADI_5g16150v3	-0.942552	1	4.13426	2.77265e-06	4.18926	1.06166e-07	3.33848	1.36918e-06	4.69445	1.57086e-09	6.12448	2.57575e-21	NA	GO:0004672(protein kinase activity);GO:0005509(calcium ion binding);GO:0005524(ATP binding);GO:0006468(protein phosphorylation);GO:0016020(membrane);GO:0016021(integral component of membrane);GO:0030247(polysaccharide binding);GO:0030247(polysaccharide binding)
HORVU5Hr1G092750	hypothetical protein C2845_PM03G36320	-13.4624	1	-3.48824	1	-3.79007	1	-6.56249	3.41209e-11	-6.58031	5.03268e-09	-14.5439	2.0269e-10	NA	NA
HORVU6Hr1G012640	hypothetical protein C2845_PM05G20060	2.0749	1	6.57003	3.78802e-11	5.55247	2.58216e-16	4.80362	6.73467e-07	8.34595	1.28171e-12	10.8495	2.65404e-49	NA	GO:0004867(serine-type endopeptidase inhibitor activity);GO:0009611(response to wounding);GO:0010951(negative regulation of endopeptidase activity)
HORVU3Hr1G076400	hypothetical protein glysoja_014900	1.04905	0.249815	3.03505	0.000317764	0.156451	1	3.5862	4.2156e-07	4.46526	2.75294e-09	3.64055	5.51483e-06	NA	NA
HORVU2Hr1G106400	hypothetical protein OsJ_31898	2.0536	0.0137115	3.29232	3.33046e-05	3.56134	1.51766e-07	2.75386	3.81009e-05	3.57797	1.19441e-06	4.02897	1.93107e-07	NA	NA
HORVU7Hr1G086570	hypothetical protein SETIT_4G233600v2	-0.515038	0.000726135	-1.12039	0.000185305	-1.68237	1.39248e-06	-1.5222	2.52838e-13	-1.75502	2.63251e-07	-2.83134	3.01513e-11	NA	NA
HORVU7Hr1G020510	hypothetical protein TRIUR3_00239	5.48904	4.38515e-06	4.5536	0.000244719	2.43901	1	5.33009	1.58298e-18	6.20934	1.69868e-25	4.89068	7.1108e-14	NA	NA
HORVU5Hr1G012550	hypothetical protein TRIUR3_01336	0.261135	0.877038	0.393197	0.492266	0.311879	0.307116	2.12778	0.00156724	3.14904	1.40617e-06	2.55102	9.49058e-05	NA	GO:0016020(membrane);GO:0016021(integral component of membrane);GO:0016021(integral component of membrane)
HORVU3Hr1G114250	hypothetical protein TRIUR3_01588	4.11847	1.34382e-13	5.14589	3.86815e-17	1.77085	0.0273399	6.21197	1.70167e-24	7.65382	1.13437e-41	5.65272	2.94615e-17	NA	NA
HORVU2Hr1G115750	hypothetical protein TRIUR3_03117	-13.0778	1.38915e-10	-1.52909	0.084192	-5.97439	2.34072e-06	-5.30106	1.93925e-08	-2.85897	7.70409e-05	-13.7715	8.24308e-11	NA	NA
HORVU0Hr1G017850	hypothetical protein TRIUR3_03453	-1.40486	1	-3.11186	1	-4.59182	1	-1.98093	7.36684e-06	-3.19866	5.60623e-06	-3.13284	2.01367e-05	NA	GO:0016020(membrane);GO:0016021(integral component of membrane)
HORVU2Hr1G087070	hypothetical protein TRIUR3_04271	0.427265	0.79306	-1.70187	0.0102644	-2.58254	0.000253269	-1.15365	0.00120597	-3.95536	2.89877e-08	-4.02333	5.63326e-07	NA	NA
HORVU5Hr1G115750	hypothetical protein TRIUR3_04649	1.52035	0.0465371	5.41537	1.05204e-09	6.00922	2.70185e-15	2.53903	1.9801e-05	6.23692	2.88144e-21	7.82599	4.08727e-33	NA	NA
HORVU5Hr1G072650	hypothetical protein TRIUR3_05529	9.56615	5.88967e-33	8.63297	2.39713e-11	4.5631	1	6.54869	7.52844e-18	9.30478	6.83471e-43	9.46513	2.26087e-25	NA	GO:0005509(calcium ion binding)
HORVU5Hr1G063270	hypothetical protein TRIUR3_06177	1.79337	0.0300281	1.85425	0.065194	2.53875	0.00017087	2.57583	0.000547073	3.61727	5.53932e-05	2.67591	0.00256525	NA	NA
HORVU1Hr1G003990	hypothetical protein TRIUR3_10792	2.19117	0.0166289	4.77411	3.86059e-09	4.90056	7.68803e-11	2.94927	0.0028601	4.81478	1.22957e-07	4.21797	4.93905e-06	NA	NA
HORVU4Hr1G062250	hypothetical protein TRIUR3_11255	-7.25542	1	-7.25542	1	-7.25542	1	-12.5046	1.14925e-10	-12.5046	2.85126e-09	-12.5046	4.47711e-08	04144(Endocytosis);04144(Endocytosis)	GO:0015031(protein transport);GO:0015031(protein transport)
HORVU3Hr1G015310	hypothetical protein TRIUR3_12169	-0.51908	1	-2.65415	1	-1.71284	1	-1.44579	0.00127577	-2.08301	0.00042828	-2.76314	0.00075467	NA	NA
HORVU2Hr1G003540	hypothetical protein TRIUR3_12563	0.829275	0.190796	1.57909	0.0017953	2.40616	3.9736e-10	3.04064	3.55608e-10	3.44923	2.19254e-10	4.71044	1.35323e-26	04626(Plant-pathogen interaction);04626(Plant-pathogen interaction)	GO:0000145(exocyst);GO:0006887(exocytosis);GO:0015031(protein transport);GO:0043531(ADP binding);GO:0043531(ADP binding)
HORVU7Hr1G089380	hypothetical protein TRIUR3_12827	0.248812	0.889275	0.94646	0.100638	0.334705	0.42896	1.62431	0.000590773	2.04121	9.87861e-05	1.53757	0.000539702	NA	GO:0016020(membrane);GO:0016021(integral component of membrane);GO:0016021(integral component of membrane)
HORVU1Hr1G022000	hypothetical protein TRIUR3_13658	-0.982301	1	-1.23982	1	-0.699326	1	-2.59457	9.66898e-05	-3.81801	3.26077e-06	-4.08091	9.00557e-05	NA	NA
HORVU1Hr1G042870	hypothetical protein TRIUR3_15917	-0.505095	0.0588985	-1.07957	0.0294582	-2.04502	0.000162167	-1.37195	1.11606e-05	-1.38552	0.00106585	-2.7646	3.46069e-06	NA	GO:0004518(nuclease activity);GO:0090305(nucleic acid phosphodiester bond hydrolysis);GO:0090305(nucleic acid phosphodiester bond hydrolysis)
HORVU4Hr1G075470	hypothetical protein TRIUR3_16793	4.19754	1.58995e-16	1.48309	0.0497098	3.10952	6.15027e-08	4.49126	2.17297e-19	4.55619	1.7536e-11	3.69503	9.8634e-07	NA	GO:0004869(cysteine-type endopeptidase inhibitor activity);GO:0010951(negative regulation of endopeptidase activity)
HORVU4Hr1G053620	hypothetical protein TRIUR3_17241	-1.11669	0.00419043	-2.39146	0.0140594	-2.19238	0.00046495	-2.34949	4.19664e-11	-2.76973	1.14673e-05	-2.55605	1.06329e-05	NA	NA
HORVU4Hr1G014590	hypothetical protein TRIUR3_18766	3.36326	1	6.05157	3.4019e-09	6.13825	8.49044e-11	4.08193	1.00854e-05	6.60891	2.92221e-18	6.39138	4.77858e-18	NA	GO:0016020(membrane);GO:0016021(integral component of membrane);GO:0016021(integral component of membrane)
HORVU1Hr1G036340	hypothetical protein TRIUR3_19949	1.17549	0.172938	0.206389	0.890133	0.509431	0.417982	3.34988	1.77536e-06	3.22299	0.000107201	2.24521	0.00155659	NA	NA
HORVU5Hr1G016270	hypothetical protein TRIUR3_19949	1.05559	0.253055	-0.835788	0.290555	-3.06685	0.00138017	-2.10062	2.93807e-05	-3.02788	0.000332124	-6.83635	1.25767e-08	NA	NA
HORVU5Hr1G070630	hypothetical protein TRIUR3_20232	-2.94576	1.23684e-09	-3.70298	7.13578e-09	-1.81923	0.00497393	-2.48218	1.26307e-06	-2.74667	3.19062e-08	-3.29878	4.75126e-09	NA	NA
HORVU2Hr1G104000	hypothetical protein TRIUR3_22037	0.315574	0.976886	2.47642	2.8742e-05	1.79626	0.00234865	1.78467	0.00132891	2.53186	1.13044e-05	2.19268	6.4565e-05	NA	NA
HORVU7Hr1G075090	hypothetical protein TRIUR3_23953	8.63599	3.31802e-25	6.25723	2.45823e-07	4.69748	1	16.4711	5.71069e-26	16.4194	2.8531e-16	15.0194	4.00389e-13	04075(Plant hormone signal transduction)	GO:0009733(response to auxin)
HORVU1Hr1G089510	hypothetical protein TRIUR3_26255	-4.8714	1.24992e-11	0.13008	0.943779	0.701863	0.167272	-8.41268	6.74879e-15	-3.91356	1.26409e-05	-3.76629	0.00169924	NA	GO:0003677(DNA binding);GO:0003677(DNA binding)
HORVU3Hr1G091250	hypothetical protein TRIUR3_26381	-0.617875	0.00792861	1.26275	0.0207268	2.392	4.3051e-08	1.98698	4.3875e-10	3.04367	6.37877e-16	4.22466	1.12713e-20	NA	NA
HORVU7Hr1G079700	hypothetical protein TRIUR3_26771	4.31518	1.56216e-19	2.48535	0.000106003	0.89151	0.131222	5.02035	4.03522e-29	3.98069	1.2646e-06	2.51427	3.73318e-05	NA	NA
ENSRNA050016380	hypothetical protein TRIUR3_29875	0.643672	1	-0.918246	1	-1.24074	1	-2.74139	1.36957e-06	-3.32908	2.44894e-06	-3.34093	8.24231e-05	NA	NA
ENSRNA049487465	hypothetical protein TRIUR3_29875	0.600564	0.646827	-0.912548	1	-1.09375	1	-2.51887	5.49584e-06	-3.22895	4.6255e-06	-2.96448	0.000385892	NA	NA
ENSRNA049487460	hypothetical protein TRIUR3_29875	0.258398	1	-1.08101	1	-1.42062	1	-2.46612	7.09052e-06	-3.13771	6.56354e-06	-3.01208	0.000281416	NA	NA
HORVU1Hr1G008900	hypothetical protein TRIUR3_30035	1.01284	1	2.53215	1	6.14061	6.84105e-08	1.15495	0.00277571	2.36322	4.4078e-09	1.75354	9.3731e-08	NA	NA
HORVU5Hr1G040160	hypothetical protein TRIUR3_30722	2.57631	2.4288e-06	1.55376	0.00333036	2.67096	2.64443e-13	3.39729	8.33137e-22	2.62331	3.63644e-07	2.73758	1.87939e-11	NA	GO:0016020(membrane);GO:0016021(integral component of membrane);GO:0016021(integral component of membrane)
HORVU2Hr1G006230	hypothetical protein TRIUR3_31327	1.16611	0.107881	1.49425	0.0279727	1.47748	0.00631255	3.45431	2.02268e-12	3.56441	1.8797e-08	3.61639	3.26113e-11	NA	NA
HORVU3Hr1G053620	hypothetical protein TRIUR3_33084	-2.3677	5.47723e-12	-2.35586	2.8811e-09	-0.872838	0.0381152	-1.93162	3.36219e-17	-3.21135	2.33037e-22	-2.12685	1.22879e-07	00511(Other glycan degradation);00511(Other glycan degradation)	NA
HORVU6Hr1G070610	hypothetical protein TRIUR3_35028	2.11824	0.00813661	3.28948	2.141e-05	3.685	1.12162e-08	3.72858	7.79905e-06	4.14752	4.62341e-05	5.50003	3.23045e-13	NA	NA
HORVU6Hr1G001340	keratin-associated protein 5-3-like	-12.5034	1	-12.5034	1	-5.08755	1	-13.9418	6.27569e-15	-13.9418	3.81929e-12	-13.9418	1.58702e-10	NA	NA
HORVU4Hr1G038080	Kinesin-related protein 4	-1.58279	0.00175894	-1.49492	0.0381526	-3.83846	8.01131e-05	-3.31423	0.000121528	-5.8355	4.15766e-07	-5.09156	3.2918e-05	NA	GO:0000166(nucleotide binding);GO:0003777(microtubule motor activity);GO:0005524(ATP binding);GO:0007018(microtubule-based movement);GO:0008017(microtubule binding)
HORVU3Hr1G023370	large subunit of ADP-glucose pyrophosphorylase (plastid)	-1.48551	0.0182812	-2.68695	0.0206262	-3.78938	4.98119e-05	-1.69172	0.000636115	-2.37196	0.000300331	-6.58217	1.50339e-08	00500(Starch and sucrose metabolism);00520(Amino sugar and nucleotide sugar metabolism);00520(Amino sugar and nucleotide sugar metabolism)	GO:0005978(glycogen biosynthetic process);GO:0008878(glucose-1-phosphate adenylyltransferase activity);GO:0009058(biosynthetic process);GO:0016779(nucleotidyltransferase activity);GO:0016779(nucleotidyltransferase activity)
HORVU3Hr1G007540	LEAF RUST 10 DISEASE-RESISTANCE LOCUS RECEPTOR-LIKE PROTEIN KINASE-like 1.2 isoform X1	1.37429	0.016199	3.18859	7.58254e-08	2.65091	6.67639e-08	2.40202	7.08986e-09	2.38576	6.62186e-06	2.93917	2.79811e-13	NA	GO:0000166(nucleotide binding);GO:0004672(protein kinase activity);GO:0004674(protein serine/threonine kinase activity);GO:0005524(ATP binding);GO:0006468(protein phosphorylation);GO:0016020(membrane);GO:0016021(integral component of membrane);GO:0030247(polysaccharide binding);GO:0030247(polysaccharide binding)
HORVU3Hr1G051610	leucine-rich repeat extensin-like protein 6	1.62776	0.0512016	0.225438	0.825384	4.31998	1.65607e-19	-1.16774	7.61316e-05	2.53819	7.97295e-05	3.14762	4.45927e-14	NA	GO:0005515(protein binding);GO:0005515(protein binding)
HORVU4Hr1G080150	LOB domain-containing protein 29-like	2.35125	0.0003662	2.07223	0.00572765	2.64685	8.64371e-06	2.44471	0.000491106	2.34098	0.00109325	2.23624	0.00334716	NA	NA
HORVU3Hr1G096620	long chain base biosynthesis protein 2d	0.374447	0.80571	0.218291	0.756363	0.343921	0.209134	1.28841	6.42484e-05	1.53849	8.06244e-06	1.99575	6.22726e-09	00600(Sphingolipid metabolism);00600(Sphingolipid metabolism)	GO:0003824(catalytic activity);GO:0009058(biosynthetic process);GO:0016020(membrane);GO:0016021(integral component of membrane);GO:0016740(transferase activity);GO:0030170(pyridoxal phosphate binding);GO:0030170(pyridoxal phosphate binding)
HORVU7Hr1G114610	L-type lectin-domain containing receptor kinase IX.1 [Dichanthelium oligosanthes]	6.4713	1	11.6806	1	12.7784	3.08562e-10	5.8765	2.66835e-07	8.56869	1.10267e-11	9.79085	4.10874e-23	NA	GO:0000166(nucleotide binding);GO:0004672(protein kinase activity);GO:0004674(protein serine/threonine kinase activity);GO:0004713(protein tyrosine kinase activity);GO:0005524(ATP binding);GO:0006468(protein phosphorylation);GO:0016020(membrane);GO:0016021(integral component of membrane);GO:0018108(peptidyl-tyrosine phosphorylation);GO:0018108(peptidyl-tyrosine phosphorylation)
HORVU5Hr1G020530	L-type lectin-domain containing receptor kinase S.4-like	1.75276	0.0211317	2.61919	0.000171529	1.08175	0.0969582	2.22814	0.000296192	3.51546	7.0394e-07	1.66654	0.00332548	NA	GO:0002229(defense response to oomycetes);GO:0004672(protein kinase activity);GO:0005524(ATP binding);GO:0005886(plasma membrane);GO:0006468(protein phosphorylation);GO:0016020(membrane);GO:0016021(integral component of membrane);GO:0030246(carbohydrate binding);GO:0042742(defense response to bacterium)
HORVU3Hr1G114970	LUX	0.0305138	0.403112	-0.563042	0.152758	-1.79066	0.000204345	3.69783	8.41338e-10	3.71941	3.85285e-07	3.62444	2.04808e-07	04075(Plant hormone signal transduction);04075(Plant hormone signal transduction)	GO:0003677(DNA binding);GO:0005634(nucleus);GO:0005634(nucleus)
HORVU2Hr1G092380	Lysine-specific demethylase 3B	1.24431	0.000357322	0.696266	0.0992713	1.06889	0.000829226	1.20932	0.000632583	1.47427	7.87041e-05	1.1578	6.79805e-05	NA	NA
HORVU6Hr1G074210	MACPF domain-containing protein At1g14780-like isoform X2	3.02291	0.0175616	3.99066	0.00195481	4.41376	0.000174129	4.33529	3.28399e-09	4.9484	2.41342e-12	5.80109	8.92323e-21	NA	NA
HORVU4Hr1G077850	MADS-box protein 1-2	1.75371	1.65009e-05	1.13743	0.0323689	1.75645	5.24115e-06	2.23496	5.12343e-09	2.68135	8.02383e-10	2.88648	2.47824e-12	NA	GO:0000977(RNA polymerase II regulatory region sequence-specific DNA binding);GO:0003677(DNA binding);GO:0003700(DNA-binding transcription factor activity);GO:0005634(nucleus);GO:0006351(transcription, DNA-templated);GO:0006355(regulation of transcription, DNA-templated);GO:0045944(positive regulation of transcription by RNA polymerase II);GO:0046983(protein dimerization activity);GO:0046983(prot…
HORVU5Hr1G070040	mavicyanin-like	1.78982	0.0125145	1.87333	0.0124061	1.02123	0.114423	5.05495	3.54557e-16	3.55583	5.36237e-06	3.64305	1.45779e-05	NA	GO:0009055(electron transfer activity);GO:0022900(electron transport chain);GO:0022900(electron transport chain)
HORVU6Hr1G060500	Membrane steroid-binding protein 2	12.7943	9.6484e-11	12.8664	1.82198e-10	11.4857	1	5.87619	5.80757e-09	5.45658	1.11839e-07	4.58763	2.01872e-06	NA	GO:0016020(membrane);GO:0016021(integral component of membrane);GO:0016021(integral component of membrane)
HORVU4Hr1G069320	metal transporter Nramp2	1.1695	0.0092311	1.83397	1.93601e-05	2.05397	1.06646e-08	1.56835	0.000116966	2.22689	8.96457e-07	2.0706	4.6595e-08	NA	GO:0016020(membrane);GO:0016021(integral component of membrane);GO:0030001(metal ion transport);GO:0046873(metal ion transmembrane transporter activity);GO:0046873(metal ion transmembrane transporter activity)
HORVU4Hr1G013220	metal transporter Nramp6-like	-6.69984	1	6.66562	9.54384e-06	3.29417	1	-6.12296	9.62536e-15	-2.33597	0.000197182	-4.92292	1.50596e-05	NA	GO:0016020(membrane);GO:0016021(integral component of membrane);GO:0030001(metal ion transport);GO:0046873(metal ion transmembrane transporter activity);GO:0046873(metal ion transmembrane transporter activity)
HORVU3Hr1G115990	metallothioneine type2	0.453151	0.545781	-1.67305	1.65338e-05	-4.93691	5.12371e-20	1.26867	0.000519939	-1.35322	3.99258e-06	-4.07366	1.12668e-08	NA	GO:0046872(metal ion binding);GO:0046872(metal ion binding)
HORVU2Hr1G023560	Mg-chelatase subunit XANTHA-F	-0.794372	3.36875e-05	-2.21023	2.10414e-09	-2.82596	2.98475e-15	-1.81051	1.41106e-14	-1.51159	2.60831e-07	-3.44026	1.05458e-12	00860(Porphyrin and chlorophyll metabolism);00860(Porphyrin and chlorophyll metabolism)	GO:0009058(biosynthetic process);GO:0015995(chlorophyll biosynthetic process);GO:0016851(magnesium chelatase activity);GO:0016851(magnesium chelatase activity)
HORVU3Hr1G049720	mitochondrial carrier protein CoAc1 isoform X1	1.4713	3.4013e-05	1.11995	0.00750059	1.65891	6.41097e-07	1.52567	2.7873e-06	1.44453	0.000406604	1.0559	0.000480273	NA	GO:0016020(membrane);GO:0016021(integral component of membrane);GO:0022857(transmembrane transporter activity);GO:0055085(transmembrane transport);GO:0055085(transmembrane transport)
HORVU7Hr1G097730	mitogen-activated protein kinase 4	-1.05632	0.00120722	-1.25578	0.00879861	-1.20435	0.0327289	-1.17729	0.000163384	-1.85119	0.000224498	-1.73406	0.00462343	04016(MAPK signaling pathway - plant)	GO:0004672(protein kinase activity);GO:0005524(ATP binding);GO:0006468(protein phosphorylation)
HORVU1Hr1G078720	mitogen-activated protein kinase kinase kinase NPK1-like	0.102828	1	7.43808	2.47099e-16	7.71096	1.78586e-22	2.558	0.00177956	6.73519	1.60188e-14	8.07775	2.21768e-19	04016(MAPK signaling pathway - plant);04016(MAPK signaling pathway - plant)	GO:0004672(protein kinase activity);GO:0005524(ATP binding);GO:0006468(protein phosphorylation);GO:0006468(protein phosphorylation)
HORVU4Hr1G028780	MYB transcription factor 82	2.93496	1	3.80703	0.000694605	5.53192	1.67669e-09	5.9443	1.66281e-07	6.75127	4.29923e-09	7.85919	1.03992e-14	NA	GO:0003677(DNA binding);GO:0003677(DNA binding)
HORVU3Hr1G116740	MYB13-2	5.31726	1.27334e-06	6.26473	5.26159e-06	1.7635	1	7.5713	1.53014e-23	4.61033	1.38793e-05	5.35518	0.000186573	NA	NA
HORVU3Hr1G063460	myb-related protein Myb4-like	1.65206	0.208668	5.99127	1.95445e-07	7.48872	3.76842e-16	3.25656	4.26503e-07	5.52101	1.00663e-11	6.39845	2.39401e-36	NA	GO:0003677(DNA binding);GO:0005634(nucleus);GO:0005634(nucleus)
HORVU5Hr1G125430	myosin-8-like	-0.108498	0.185954	-0.869596	0.0191871	-1.89825	2.57008e-05	-1.10852	5.93821e-07	-1.06941	0.00137541	-2.55384	1.47574e-08	NA	GO:0000166(nucleotide binding);GO:0003774(motor activity);GO:0003779(actin binding);GO:0005515(protein binding);GO:0005524(ATP binding);GO:0007015(actin filament organization);GO:0016459(myosin complex);GO:0051015(actin filament binding);GO:0051015(actin filament binding)
HORVU1Hr1G044020	myosin-8-like isoform X1	1.1092	0.00131941	1.22691	0.00129816	0.976058	0.00178681	1.23149	5.0086e-05	2.18106	1.06633e-08	1.59575	3.95522e-07	NA	GO:0000166(nucleotide binding);GO:0003774(motor activity);GO:0003779(actin binding);GO:0005515(protein binding);GO:0005524(ATP binding);GO:0007015(actin filament organization);GO:0016020(membrane);GO:0016021(integral component of membrane);GO:0016459(myosin complex);GO:0016459(myosin complex)
HORVU7Hr1G034070	NA	0.494678	0.539989	-1.30248	0.0524148	-5.31932	6.08977e-27	4.14895	6.43194e-31	2.04285	3.40878e-05	-6.77781	8.85424e-10	00010(Glycolysis / Gluconeogenesis);00052(Galactose metabolism);00052(Galactose metabolism)	GO:0003824(catalytic activity);GO:0004034(aldose 1-epimerase activity);GO:0005975(carbohydrate metabolic process);GO:0016853(isomerase activity);GO:0019318(hexose metabolic process);GO:0030246(carbohydrate binding);GO:0030246(carbohydrate binding)
HORVU7Hr1G108230	NA	1.1399	0.00967231	1.36085	0.0023856	0.658021	0.0852188	2.51686	6.83748e-14	2.74635	1.24023e-11	2.11733	9.45593e-08	00010(Glycolysis / Gluconeogenesis);00710(Carbon fixation in photosynthetic organisms);00710(Carbon fixation in photosynthetic organisms)	GO:0004618(phosphoglycerate kinase activity);GO:0006096(glycolytic process);GO:0016301(kinase activity);GO:0016310(phosphorylation);GO:0016740(transferase activity);GO:0016740(transferase activity)
HORVU2Hr1G085800	NA	0.588394	0.409357	-0.144465	0.435264	1.27701	0.000424591	1.79998	7.0593e-08	1.42947	0.00296905	1.75749	1.54451e-06	00500(Starch and sucrose metabolism);00500(Starch and sucrose metabolism)	GO:0000272(polysaccharide catabolic process);GO:0003824(catalytic activity);GO:0004553(hydrolase activity, hydrolyzing O-glycosyl compounds);GO:0005975(carbohydrate metabolic process);GO:0008152(metabolic process);GO:0008810(cellulase activity);GO:0016020(membrane);GO:0016021(integral component of membrane);GO:0016787(hydrolase activity);GO:0016798(hydrolase activity, acting on glycosyl bonds);GO…
HORVU2Hr1G082370	NA	3.55474	4.9516e-20	1.52079	0.010807	0.466832	0.358778	3.33685	4.93764e-16	1.78179	0.0032386	1.56154	0.00179095	00904(Diterpenoid biosynthesis);00904(Diterpenoid biosynthesis)	GO:0016491(oxidoreductase activity);GO:0046872(metal ion binding);GO:0055114(oxidation-reduction process);GO:0055114(oxidation-reduction process)
HORVU7Hr1G098510	NA	0.444823	0.73524	1.13053	0.0132555	2.42858	1.23296e-09	1.54626	1.23748e-06	2.415	1.73573e-09	3.04541	6.17608e-15	00940(Phenylpropanoid biosynthesis);00940(Phenylpropanoid biosynthesis)	NA
HORVU1Hr1G063720	NA	0.876798	0.161037	1.48464	0.0037573	1.40379	0.000488726	1.39673	0.000507426	2.54419	3.22357e-10	2.42987	9.83666e-11	03060(Protein export);03060(Protein export)	GO:0004672(protein kinase activity);GO:0005515(protein binding);GO:0005524(ATP binding);GO:0006468(protein phosphorylation);GO:0046872(metal ion binding);GO:0046872(metal ion binding)
HORVU3Hr1G049470	NA	0.610811	0.231011	1.06151	0.00396116	1.4381	2.10477e-06	1.1584	0.000255522	1.46483	3.40749e-05	1.43591	4.84091e-07	04141(Protein processing in endoplasmic reticulum);04141(Protein processing in endoplasmic reticulum)	GO:0016020(membrane);GO:0016021(integral component of membrane);GO:0016021(integral component of membrane)
HORVU3Hr1G113210	NA	3.61466	0.000461243	5.70809	2.2963e-07	2.35515	0.0324658	3.4571	1.96855e-13	5.27323	1.80027e-19	3.54644	5.84053e-08	04144(Endocytosis);04144(Endocytosis)	GO:0005623(cell);GO:0006662(glycerol ether metabolic process);GO:0015035(protein disulfide oxidoreductase activity);GO:0045454(cell redox homeostasis);GO:0045454(cell redox homeostasis)
HORVU3Hr1G104770	NA	1.20019	0.0109862	4.12584	3.04248e-22	4.21324	4.26959e-29	3.10838	6.58511e-11	6.00852	1.40189e-45	6.16749	5.7103e-40	04626(Plant-pathogen interaction);04626(Plant-pathogen interaction)	GO:0043531(ADP binding);GO:0043531(ADP binding)
HORVU7Hr1G042000	NA	1.25545	0.0454133	2.24212	6.36651e-05	2.97011	2.28315e-09	3.91861	5.55132e-19	3.13439	2.31167e-11	5.4134	6.81617e-24	NA	NA
HORVU3Hr1G106810	NA	3.28518	0.00179399	3.0045	0.00675711	1.47403	1	7.53024	8.07078e-10	6.76297	1.39508e-07	6.41977	1.07514e-06	NA	GO:0016020(membrane);GO:0016021(integral component of membrane);GO:0016021(integral component of membrane)
HORVU7Hr1G031020	NA	1.14898	0.000326866	0.791105	0.0479532	0.31854	0.2088	1.74453	2.08174e-09	1.81447	4.5867e-07	1.16069	0.000164858	NA	GO:0004180(carboxypeptidase activity);GO:0004185(serine-type carboxypeptidase activity);GO:0005773(vacuole);GO:0006508(proteolysis);GO:0008233(peptidase activity);GO:0016787(hydrolase activity);GO:0016787(hydrolase activity)
HORVU3Hr1G066450	NA	1.26701	0.131481	1.3569	0.100395	0.973479	0.109159	4.52355	7.83554e-09	4.12748	0.000185283	4.06664	4.57982e-06	NA	GO:0016787(hydrolase activity);GO:0016787(hydrolase activity)
HORVU1Hr1G067490	NA	1.41931	0.0482705	1.60368	0.0217058	2.48455	4.13201e-06	2.50002	2.01124e-05	2.65963	6.76973e-06	4.00812	5.22177e-14	NA	NA
HORVU7Hr1G117570	NA	0.755673	0.510338	1.9948	0.0100402	2.17905	0.000475221	3.43709	2.32796e-05	3.09348	0.00025238	4.20115	9.24753e-07	NA	GO:0043531(ADP binding);GO:0043531(ADP binding)
HORVU7Hr1G086330	NA	-1.56033	0.00384073	1.46674	0.0368122	3.11174	6.17579e-07	2.50429	5.70348e-05	3.52173	5.16501e-06	5.62339	1.07305e-11	NA	GO:0016020(membrane);GO:0016021(integral component of membrane);GO:0016021(integral component of membrane)
HORVU4Hr1G057100	NA	0.766676	0.180964	0.335293	0.636162	0.708451	0.0583334	1.25048	0.000146929	1.38897	0.0010645	1.05187	0.000693891	NA	GO:0016020(membrane);GO:0016021(integral component of membrane);GO:0016021(integral component of membrane)
HORVU6Hr1G085730	NA	1.13574	0.00263902	1.25642	0.00232337	0.935772	0.00343062	1.50767	0.000209193	1.53758	0.00104086	2.04833	7.33394e-09	NA	GO:0006508(proteolysis);GO:0008236(serine-type peptidase activity);GO:0008236(serine-type peptidase activity)
HORVU2Hr1G045810	NA	0.178031	0.715674	0.673235	0.237181	-0.233964	0.718696	1.59575	0.000385592	1.74355	0.000455079	1.75716	4.85141e-06	NA	GO:0003924(GTPase activity);GO:0005525(GTP binding);GO:0005525(GTP binding)
HORVU6Hr1G088370	NA	-0.0452947	0.18722	0.0722857	0.867137	0.0899895	0.7264	1.58568	0.000612268	1.52316	0.00163067	1.67903	0.0001011	NA	GO:0003700(DNA-binding transcription factor activity);GO:0006355(regulation of transcription, DNA-templated);GO:0008270(zinc ion binding);GO:0043565(sequence-specific DNA binding);GO:0046872(metal ion binding);GO:0046872(metal ion binding)
HORVU6Hr1G066740	NA	0.714958	0.242398	2.14656	5.47562e-08	1.90141	5.98086e-07	1.47179	0.0014523	3.08455	1.45841e-15	3.0181	1.6952e-17	NA	GO:0005215(transporter activity);GO:0016020(membrane);GO:0016021(integral component of membrane);GO:0016021(integral component of membrane)
HORVU3Hr1G052160	NA	-12.3869	1	-3.75747	1	-3.20246	1	-14.1779	6.88376e-17	-14.1779	8.21273e-14	-5.09187	5.22027e-06	NA	NA
HORVU7Hr1G043920	NA	-0.164924	0.157831	-1.48736	0.000460957	-2.15511	1.93236e-06	-3.90414	8.15936e-16	-5.10072	3.68133e-28	-6.75405	1.96544e-32	NA	GO:0003676(nucleic acid binding);GO:0003676(nucleic acid binding)
HORVU5Hr1G000330	NA	-12.3527	1	-1.95454	1	-4.38051	1	-2.56662	1.04866e-11	-4.21347	3.98416e-13	-3.37019	1.46411e-07	NA	GO:0012511(monolayer-surrounded lipid storage body);GO:0016020(membrane);GO:0016021(integral component of membrane)
HORVU1Hr1G083660	NA	-0.41463	0.0070333	-0.290901	0.238063	-1.02301	0.00479946	-1.28306	5.69297e-10	-1.06988	0.000967033	-2.06644	2.56522e-07	NA	GO:0000127(transcription factor TFIIIC complex);GO:0006384(transcription initiation from RNA polymerase III promoter);GO:0016020(membrane);GO:0016021(integral component of membrane);GO:0016021(integral component of membrane)
ENSRNA049489139	NA	-0.015862	0.513538	-0.758498	0.158137	-1.48327	0.0156992	-2.51041	1.34441e-09	-2.36045	1.95999e-06	-3.54961	4.29437e-08	NA	NA
HORVU2Hr1G063870	NA	-13.2334	1	-5.00787	1	-5.24314	1	-14.573	8.25191e-09	-7.47064	1.74919e-06	-4.46571	0.000677351	NA	NA
HORVU2Hr1G064370	NA	-1.6046	1	-2.77104	1	-4.02739	1	-3.3178	1.6429e-06	-3.34961	0.000206817	-5.60551	1.73953e-06	NA	NA
HORVU2Hr1G019950	NA	-0.734137	0.0155612	-2.026	0.000561759	-3.2434	2.74393e-08	-1.59973	2.13139e-05	-3.12395	1.80223e-06	-5.84593	1.74981e-09	NA	GO:0030001(metal ion transport);GO:0046872(metal ion binding);GO:0046872(metal ion binding)
HORVU2Hr1G118830	NA	-1.19641	0.0100164	-3.86524	2.73328e-06	-7.34919	2.64641e-12	-2.21452	3.96515e-05	-4.05256	3.27493e-08	-6.98685	3.4797e-11	NA	NA
HORVU2Hr1G017400	NAC transcription factor	0.984582	0.139657	3.95814	8.20377e-12	5.52159	2.48654e-25	2.76282	8.85482e-10	4.24436	2.78508e-16	5.82215	1.07082e-25	03013(RNA transport);03015(mRNA surveillance pathway);03018(RNA degradation);03018(RNA degradation)	GO:0003677(DNA binding);GO:0005634(nucleus);GO:0006355(regulation of transcription, DNA-templated);GO:0006355(regulation of transcription, DNA-templated)
HORVU4Hr1G051360	NAC transcription factor	0.24236	0.82904	1.3893	0.0274213	2.61952	2.14927e-07	1.8961	0.000223735	2.25931	2.33742e-05	2.78901	5.82697e-08	03013(RNA transport);03015(mRNA surveillance pathway);03018(RNA degradation);03018(RNA degradation)	GO:0003677(DNA binding);GO:0005634(nucleus);GO:0006355(regulation of transcription, DNA-templated);GO:0006355(regulation of transcription, DNA-templated)
HORVU7Hr1G002260	NBS2-RDG2A	3.69657	1.07399e-05	2.60892	0.00707907	2.10068	0.0186282	2.8062	2.11455e-12	2.61331	3.38982e-08	1.73205	0.000232354	NA	GO:0043531(ADP binding);GO:0043531(ADP binding)
HORVU5Hr1G113030	NBS-LRR resistance protein analog 1	1.07404	0.0100605	1.27793	0.00227307	1.43525	2.2099e-05	1.59175	3.36411e-06	1.55821	0.000102271	1.61092	3.35716e-07	04626(Plant-pathogen interaction);04626(Plant-pathogen interaction)	GO:0043531(ADP binding);GO:0043531(ADP binding)
HORVU3Hr1G083680	NDR1/HIN1-like protein 10	0.116283	0.723185	5.21564	4.47439e-11	7.36845	2.36558e-20	3.55522	2.71155e-10	5.03048	1.99208e-12	7.53811	1.96762e-29	NA	NA
HORVU6Hr1G081080	NF-YA10-1 [Thinopyrum ponticum x Triticum aestivum]	-0.527109	0.00330371	-1.67759	2.71468e-05	-2.62466	2.72625e-09	-2.2332	6.11206e-16	-3.4398	3.83862e-17	-3.48059	5.95136e-10	NA	GO:0003700(DNA-binding transcription factor activity);GO:0006355(regulation of transcription, DNA-templated);GO:0006355(regulation of transcription, DNA-templated)
HORVU4Hr1G052990	NHL repeat-containing protein 2	-0.328735	0.0534439	-0.613424	0.0972293	-1.27362	0.00556845	-1.2453	2.28901e-07	-1.71563	2.99439e-05	-2.82138	1.79749e-09	00740(Riboflavin metabolism);00740(Riboflavin metabolism)	GO:0005515(protein binding);GO:0005623(cell);GO:0009507(chloroplast);GO:0009534(chloroplast thylakoid);GO:0009570(chloroplast stroma);GO:0010196(nonphotochemical quenching);GO:0016020(membrane);GO:0016021(integral component of membrane);GO:0016787(hydrolase activity);GO:0042651(thylakoid membrane);GO:0045454(cell redox homeostasis);GO:0045454(cell redox homeostasis)
HORVU1Hr1G071260	Nicotianamine aminotransferase A; AltName: Full=Nicotianamine aminotransferase III; Short=NAAT-III	2.00971	2.64924e-11	1.12335	0.00372871	3.52304	8.40413e-24	1.78986	1.19533e-07	2.80469	9.73376e-13	3.16188	1.18e-17	NA	GO:0003824(catalytic activity);GO:0004553(hydrolase activity, hydrolyzing O-glycosyl compounds);GO:0005975(carbohydrate metabolic process);GO:0006520(cellular amino acid metabolic process);GO:0008483(transaminase activity);GO:0009058(biosynthetic process);GO:0016740(transferase activity);GO:0030170(pyridoxal phosphate binding);GO:0033855(nicotianamine aminotransferase activity);GO:0033855(nicotia…
HORVU5Hr1G117780	nodulation-signaling pathway 1 protein	7.25825	1	6.88517	1	4.65447	1	6.56105	2.79723e-11	6.13316	1.57337e-07	6.40476	3.59122e-09	04075(Plant hormone signal transduction);04075(Plant hormone signal transduction)	NA
HORVU2Hr1G040860	nodulation-signaling pathway 1 protein	0	1	5.66832	1	0	1	5.76646	3.82067e-10	5.17912	5.98632e-05	6.253	1.98181e-10	04075(Plant hormone signal transduction);04075(Plant hormone signal transduction)	NA
HORVU1Hr1G058390	NRR repressor homolog 1-like	-2.69418	1	5.10497	0.0014679	7.31625	1.1902e-09	3.26612	0.00111936	2.68547	0.00307194	7.05006	1.03828e-33	NA	GO:0010112(regulation of systemic acquired resistance)
HORVU6Hr1G072110	nuclear factor Y B subunit, partial	-1.17092	1	-1.27832	1	1.32347	1	-3.89019	8.62672e-07	-5.93882	1.26718e-08	-6.83641	8.09557e-08	NA	GO:0005634(nucleus);GO:0006355(regulation of transcription, DNA-templated);GO:0009738(abscisic acid-activated signaling pathway);GO:0033613(activating transcription factor binding);GO:0043565(sequence-specific DNA binding);GO:0045893(positive regulation of transcription, DNA-templated);GO:0046982(protein heterodimerization activity)
HORVU2Hr1G105500	nuclear poly(A) polymerase 4-like	-10.5881	1	-10.5881	1	-2.7001	1	-13.6663	6.7802e-18	-7.21981	3.73731e-11	-13.6663	1.67341e-12	03015(mRNA surveillance pathway);03015(mRNA surveillance pathway)	GO:0003723(RNA binding);GO:0004652(polynucleotide adenylyltransferase activity);GO:0005634(nucleus);GO:0016779(nucleotidyltransferase activity);GO:0031123(RNA 3'-end processing);GO:0043631(RNA polyadenylation);GO:0043631(RNA polyadenylation)
HORVU5Hr1G076760	olee1-like protein	-1.16421	0.00574868	-2.41593	0.00331159	-4.89681	3.07208e-07	-2.03736	4.32588e-07	-3.98432	1.25519e-07	-4.69724	7.49266e-08	NA	NA
HORVU3Hr1G045460	ORF	-2.11808	0.00442526	-10.3432	2.30627e-09	-10.3432	5.59637e-11	-3.87569	1.94547e-10	-5.67666	9.05224e-10	-11.6196	1.25994e-13	NA	GO:0016020(membrane);GO:0016021(integral component of membrane);GO:0016021(integral component of membrane)
HORVU2Hr1G108370	Organic cation transporter protein	-10.498	1	-3.88599	1	-1.86834	1	-11.5732	1.92672e-14	-11.5732	6.2532e-12	-11.5732	2.70752e-10	NA	GO:0005215(transporter activity);GO:0016020(membrane);GO:0016021(integral component of membrane);GO:0022857(transmembrane transporter activity);GO:0055085(transmembrane transport);GO:0055085(transmembrane transport)
HORVU7Hr1G119100	Os01g0670600, partial	-0.435909	1	-6.30488	1	-6.30488	1	5.72326	1.09492e-11	5.62234	1.29963e-08	6.88914	1.49011e-17	NA	GO:0000166(nucleotide binding);GO:0004672(protein kinase activity);GO:0004674(protein serine/threonine kinase activity);GO:0005524(ATP binding);GO:0006468(protein phosphorylation);GO:0016301(kinase activity);GO:0016310(phosphorylation);GO:0016740(transferase activity);GO:0048544(recognition of pollen)
HORVU6Hr1G088960	P450 monooxygenase	1.98475	0.00831282	5.84081	1.21927e-15	6.09063	2.32249e-20	3.43356	2.01161e-10	7.51497	2.90181e-42	7.83044	6.09124e-28	NA	GO:0004497(monooxygenase activity);GO:0005506(iron ion binding);GO:0016491(oxidoreductase activity);GO:0016705(oxidoreductase activity, acting on paired donors, with incorporation or reduction of molecular oxygen);GO:0020037(heme binding);GO:0046872(metal ion binding);GO:0055114(oxidation-reduction process);GO:0055114(oxidation-reduction process)
HORVU3Hr1G113620	pathogenesis-related protein 4	2.0456	3.30612e-06	1.29065	0.00856749	-0.222148	0.803705	4.08833	6.61728e-33	3.04918	2.02236e-12	3.46696	1.24132e-15	NA	GO:0042742(defense response to bacterium);GO:0050832(defense response to fungus)
HORVU6Hr1G068600	pectin acetylesterase 8-like	-0.052288	0.659251	-1.78279	0.0203796	-4.71132	6.66677e-06	-1.90692	8.97409e-05	-4.41249	4.88507e-09	-6.30665	4.88801e-08	NA	GO:0005576(extracellular region);GO:0005618(cell wall);GO:0016787(hydrolase activity);GO:0071555(cell wall organization);GO:0071555(cell wall organization)
HORVU3Hr1G114350	pentatricopeptide repeat-containing protein At1g11290, chloroplastic-like	-0.727729	7.38545e-05	-1.98535	4.96214e-08	-2.73461	1.69523e-12	-1.2781	4.43963e-11	-2.01719	4.73231e-11	-3.31044	2.19719e-16	00564(Glycerophospholipid metabolism);00564(Glycerophospholipid metabolism)	GO:0004367(glycerol-3-phosphate dehydrogenase [NAD+] activity);GO:0005515(protein binding);GO:0005975(carbohydrate metabolic process);GO:0006072(glycerol-3-phosphate metabolic process);GO:0009331(glycerol-3-phosphate dehydrogenase complex);GO:0016491(oxidoreductase activity);GO:0016616(oxidoreductase activity, acting on the CH-OH group of donors, NAD or NADP as acceptor);GO:0042803(protein homodi…
HORVU7Hr1G076360	pentatricopeptide repeat-containing protein At1g71490-like	0.548156	0.319562	1.20383	0.002289	1.86664	3.45162e-08	1.00671	0.0017772	1.59847	1.9268e-05	2.52561	2.31324e-12	NA	GO:0000166(nucleotide binding);GO:0004672(protein kinase activity);GO:0004674(protein serine/threonine kinase activity);GO:0005515(protein binding);GO:0005524(ATP binding);GO:0006468(protein phosphorylation);GO:0006468(protein phosphorylation)
HORVU3Hr1G077400	pentatricopeptide repeat-containing protein At3g13160, mitochondrial-like	0.923372	0.0518368	2.24267	1.65101e-08	1.52351	3.87298e-05	1.81835	4.01511e-07	2.17471	2.25515e-07	1.44306	7.59235e-05	NA	GO:0005515(protein binding)
HORVU7Hr1G040870	pentatricopeptide repeat-containing protein At3g61520, mitochondrial	0.780384	0.335776	1.76697	0.00442627	1.05698	0.036401	2.38781	5.05199e-06	3.42232	6.78515e-10	2.92505	1.27273e-08	03018(RNA degradation)	GO:0005515(protein binding)
HORVU3Hr1G070040	pentatricopeptide repeat-containing protein At4g32450, mitochondrial	1.12348	0.00561496	1.83739	3.13993e-06	1.51484	1.18468e-05	1.33348	0.000593904	2.37124	5.97271e-09	1.6296	1.40304e-06	NA	GO:0005515(protein binding);GO:0008270(zinc ion binding);GO:0008270(zinc ion binding)
HORVU4Hr1G084920	peroxidase 5-like	1.57562	9.83979e-05	1.12013	0.00868581	1.39539	6.22516e-05	2.76873	3.03724e-22	2.62981	2.44468e-09	2.75082	9.77174e-13	00940(Phenylpropanoid biosynthesis);00940(Phenylpropanoid biosynthesis)	GO:0004601(peroxidase activity);GO:0005576(extracellular region);GO:0006979(response to oxidative stress);GO:0016491(oxidoreductase activity);GO:0020037(heme binding);GO:0042744(hydrogen peroxide catabolic process);GO:0046872(metal ion binding);GO:0055114(oxidation-reduction process);GO:0098869(cellular oxidant detoxification);GO:0098869(cellular oxidant detoxification)
HORVU1Hr1G085790	peroxidase 72-like	0	1	0	1	0	1	13.9414	1.267e-15	14.1117	2.50908e-13	17.1315	1.76819e-38	00940(Phenylpropanoid biosynthesis);00940(Phenylpropanoid biosynthesis)	GO:0004601(peroxidase activity);GO:0006979(response to oxidative stress);GO:0016020(membrane);GO:0016021(integral component of membrane);GO:0020037(heme binding);GO:0055114(oxidation-reduction process);GO:0098869(cellular oxidant detoxification);GO:0098869(cellular oxidant detoxification)
HORVU6Hr1G058820	phenylalanine ammonia-lyase	1.05007	0.191041	1.62432	0.000152229	-0.29091	0.818616	3.38077	1.33593e-25	2.62331	0.000248784	2.87619	8.71646e-06	00360(Phenylalanine metabolism);00940(Phenylpropanoid biosynthesis);00940(Phenylpropanoid biosynthesis)	GO:0003824(catalytic activity);GO:0005737(cytoplasm);GO:0006559(L-phenylalanine catabolic process);GO:0009698(phenylpropanoid metabolic process);GO:0009800(cinnamic acid biosynthetic process);GO:0016829(lyase activity);GO:0016841(ammonia-lyase activity);GO:0045548(phenylalanine ammonia-lyase activity);GO:0045548(phenylalanine ammonia-lyase activity)
HORVU2Hr1G089440	phenylalanine ammonia-lyase-like	0.0102789	0.401342	1.61411	0.00529917	2.29591	3.15087e-06	1.50294	6.80199e-05	3.33364	9.73431e-13	3.54241	4.90773e-20	00360(Phenylalanine metabolism);00940(Phenylpropanoid biosynthesis);00940(Phenylpropanoid biosynthesis)	GO:0003824(catalytic activity);GO:0005737(cytoplasm);GO:0006559(L-phenylalanine catabolic process);GO:0009698(phenylpropanoid metabolic process);GO:0009800(cinnamic acid biosynthetic process);GO:0016829(lyase activity);GO:0016841(ammonia-lyase activity);GO:0045548(phenylalanine ammonia-lyase activity);GO:0045548(phenylalanine ammonia-lyase activity)
HORVU1Hr1G002820	Phosphatidylinositide phosphatase SAC1	-0.542871	0.142081	-3.16419	5.8154e-05	-1.57482	0.0206998	-1.7644	0.00155746	-2.15375	0.00158227	-5.43937	5.26035e-06	00562(Inositol phosphate metabolism);04070(Phosphatidylinositol signaling system);04070(Phosphatidylinositol signaling system)	GO:0016020(membrane);GO:0016021(integral component of membrane);GO:0042578(phosphoric ester hydrolase activity);GO:0042578(phosphoric ester hydrolase activity)
HORVU4Hr1G046320	phosphatidylinositol 4-phosphate 5-kinase 6-like	-2.67324	3.48975e-06	-2.51024	0.038	-2.41668	0.00180062	-5.00579	1.15519e-09	-3.62996	0.000164073	-5.66413	1.9029e-06	00562(Inositol phosphate metabolism);04070(Phosphatidylinositol signaling system);04144(Endocytosis);04144(Endocytosis)	GO:0000166(nucleotide binding);GO:0005524(ATP binding);GO:0016301(kinase activity);GO:0016307(phosphatidylinositol phosphate kinase activity);GO:0016308(1-phosphatidylinositol-4-phosphate 5-kinase activity);GO:0016310(phosphorylation);GO:0016740(transferase activity);GO:0046488(phosphatidylinositol metabolic process);GO:0046854(phosphatidylinositol phosphorylation);GO:0046854(phosphatidylinositol…
HORVU4Hr1G009210	phosphatidylinositol transfer protein PDR17-like	1.39067	0.01315	1.94958	0.000465239	1.75802	0.000116884	1.75743	0.0010705	3.01365	1.15694e-08	3.00766	7.19812e-12	NA	NA
HORVU3Hr1G073020	phosphoenolpyruvate carboxylase, housekeeping isozyme	-1.03164	0.000510101	-2.00809	0.000185747	0.270372	0.522684	-1.72962	1.46574e-10	-2.36851	8.84111e-10	-2.1695	3.59041e-06	00620(Pyruvate metabolism);00710(Carbon fixation in photosynthetic organisms);00710(Carbon fixation in photosynthetic organisms)	GO:0003824(catalytic activity);GO:0006099(tricarboxylic acid cycle);GO:0008964(phosphoenolpyruvate carboxylase activity);GO:0015977(carbon fixation);GO:0015977(carbon fixation)
HORVU3Hr1G058580	Phospholipase A1-II 1	-1.48654	0.0136431	-0.0682356	0.806803	-2.19967	0.00964743	-2.37394	9.61153e-06	-1.89548	0.00328652	-3.16322	0.000120503	00220(Arginine biosynthesis);00220(Arginine biosynthesis)	GO:0006629(lipid metabolic process);GO:0008970(phospholipase A1 activity);GO:0016787(hydrolase activity);GO:0016787(hydrolase activity)
HORVU4Hr1G050400	Phospholipid-transporting ATPase 1	0.717022	0.127508	0.690544	0.115806	0.79264	0.0115332	1.17217	0.000566889	2.02163	3.40619e-08	1.27765	1.25541e-05	NA	GO:0000166(nucleotide binding);GO:0000287(magnesium ion binding);GO:0004012(phospholipid-translocating ATPase activity);GO:0005524(ATP binding);GO:0015914(phospholipid transport);GO:0016020(membrane);GO:0016021(integral component of membrane);GO:0045332(phospholipid translocation);GO:0045332(phospholipid translocation)
HORVU4Hr1G062630	phosphomevalonate kinase, peroxisomal	-0.76896	5.41236e-06	-1.19706	5.05559e-05	-1.90897	3.93281e-08	-1.20096	1.99584e-09	-1.07422	7.36143e-05	-1.92939	1.65729e-06	00900(Terpenoid backbone biosynthesis);00900(Terpenoid backbone biosynthesis)	GO:0004631(phosphomevalonate kinase activity);GO:0005524(ATP binding);GO:0005777(peroxisome);GO:0016310(phosphorylation);GO:0019287(isopentenyl diphosphate biosynthetic process, mevalonate pathway);GO:0019287(isopentenyl diphosphate biosynthetic process, mevalonate pathway)
HORVU4Hr1G072880	phosphoserine aminotransferase 1, chloroplastic-like	2.1645	0.00354231	4.40269	2.77157e-18	3.05897	5.67315e-06	2.09908	0.00030213	2.34923	7.19823e-05	1.83308	0.000581821	00260(Glycine, serine and threonine metabolism);00750(Vitamin B6 metabolism);00750(Vitamin B6 metabolism)	GO:0003824(catalytic activity);GO:0004648(O-phospho-L-serine:2-oxoglutarate aminotransferase activity);GO:0006564(L-serine biosynthetic process);GO:0008483(transaminase activity);GO:0008652(cellular amino acid biosynthetic process);GO:0016740(transferase activity);GO:0016740(transferase activity)
HORVU5Hr1G100140	Photosystem I reaction center subunit III, chloroplastic; AltName: Full=Light-harvesting complex I 17 kDa protein; AltName: Full=PSI-F; Flags: Precursor	-6.62155	1	-6.62155	1	0.471532	1	-12.6296	3.26717e-13	-6.2931	3.18765e-08	-6.42281	2.97315e-07	00195(Photosynthesis);00195(Photosynthesis)	GO:0009507(chloroplast);GO:0009522(photosystem I);GO:0009536(plastid);GO:0009538(photosystem I reaction center);GO:0009543(chloroplast thylakoid lumen);GO:0009579(thylakoid);GO:0015979(photosynthesis);GO:0015979(photosynthesis)
HORVU2Hr1G060480	Photosystem I reaction center subunit psaK, chloroplastic; AltName: Full=Light-harvesting complex I 7 kDa protein; AltName: Full=PSI-K; AltName: Full=Photosystem I subunit X; Flags: Precursor	-0.830584	0.188825	-0.671332	0.315525	-2.21332	0.00299458	-3.36661	3.09044e-12	-2.32275	0.000509051	-3.43547	1.11322e-07	00195(Photosynthesis);00195(Photosynthesis)	GO:0009507(chloroplast);GO:0009522(photosystem I);GO:0009535(chloroplast thylakoid membrane);GO:0009536(plastid);GO:0009579(thylakoid);GO:0015979(photosynthesis);GO:0016020(membrane);GO:0016021(integral component of membrane);GO:0016021(integral component of membrane)
HORVU2Hr1G038960	photosystem II 10 kDa polypeptide, chloroplastic-like	-11.9504	1	-11.9504	1	-4.78712	1	-15.2162	9.48672e-16	-6.61769	4.37694e-07	-5.364	0.000212102	00195(Photosynthesis);00195(Photosynthesis)	GO:0009523(photosystem II);GO:0009654(photosystem II oxygen evolving complex);GO:0015979(photosynthesis);GO:0016020(membrane);GO:0016021(integral component of membrane);GO:0042651(thylakoid membrane);GO:0042651(thylakoid membrane)
HORVU6Hr1G058960	Phytosulfokine receptor 1	2.20971	0.00226077	2.20328	0.00781074	0.897052	1	5.0725	6.98817e-14	4.75454	7.433e-09	3.12436	0.000121036	04075(Plant hormone signal transduction)	GO:0000166(nucleotide binding);GO:0001653(peptide receptor activity);GO:0004383(guanylate cyclase activity);GO:0004672(protein kinase activity);GO:0004674(protein serine/threonine kinase activity);GO:0005515(protein binding);GO:0005524(ATP binding);GO:0006468(protein phosphorylation);GO:0016020(membrane);GO:0016021(integral component of membrane);GO:0016301(kinase activity);GO:0016310(phosphoryla…
HORVU5Hr1G120810	pirin-like protein isoform X1	0.624817	0.696604	4.40547	5.21565e-07	5.83397	1.02897e-13	2.41654	3.39155e-06	3.7079	1.39665e-06	6.17911	1.12735e-41	NA	NA
HORVU5Hr1G120800	pirin-like protein isoform X1	0.28626	0.899513	3.79804	4.03083e-06	5.47834	1.13008e-11	2.53423	4.98168e-06	3.137	5.98732e-09	5.77626	5.78614e-34	NA	GO:0016020(membrane);GO:0016021(integral component of membrane);GO:0016021(integral component of membrane)
HORVU3Hr1G091000	PISTILLATA-like MADS-box transcription factor PI-2	-0.505255	0.0505657	-2.01935	0.000183157	-1.96989	0.000304609	-2.0058	5.64314e-12	-3.05982	3.6247e-13	-4.15294	4.80686e-16	NA	GO:0000977(RNA polymerase II regulatory region sequence-specific DNA binding);GO:0003677(DNA binding);GO:0003700(DNA-binding transcription factor activity);GO:0005634(nucleus);GO:0006351(transcription, DNA-templated);GO:0006355(regulation of transcription, DNA-templated);GO:0045944(positive regulation of transcription by RNA polymerase II);GO:0046983(protein dimerization activity);GO:0046983(prot…
HORVU5Hr1G006910	plant cysteine oxidase 2-like isoform X2	4.74618	3.71089e-23	2.5041	0.000517418	-2.05995	1	4.99259	6.62974e-29	3.35819	2.0454e-06	2.84977	1.06496e-06	00430(Taurine and hypotaurine metabolism);00430(Taurine and hypotaurine metabolism)	GO:0016702(oxidoreductase activity, acting on single donors with incorporation of molecular oxygen, incorporation of two atoms of oxygen);GO:0055114(oxidation-reduction process);GO:0055114(oxidation-reduction process)
HORVU4Hr1G004820	plasma membrane ATPase 1	-9.68162	1	-9.68162	1	-9.68162	1	-3.02197	0.000755197	-5.07712	5.12303e-08	-5.03183	2.80823e-06	00190(Oxidative phosphorylation);00190(Oxidative phosphorylation)	GO:0000166(nucleotide binding);GO:0005524(ATP binding);GO:0005886(plasma membrane);GO:0006811(ion transport);GO:0008553(proton-exporting ATPase activity, phosphorylative mechanism);GO:0016020(membrane);GO:0016021(integral component of membrane);GO:0046872(metal ion binding);GO:0120029(proton export across plasma membrane);GO:0120029(proton export across plasma membrane)
HORVU2Hr1G079840	PLAT domain-containing protein 3-like	0.549492	0.505368	-1.54635	0.00378722	-2.29562	0.000384262	-1.39789	3.04865e-09	-2.23906	2.12834e-07	-2.49473	1.64787e-08	NA	GO:0005515(protein binding);GO:0005515(protein binding)
HORVU6Hr1G093230	PM2	1.01504	0.0218348	0.800212	0.0957435	2.21752	8.72626e-08	1.41833	0.000587552	1.81081	0.000690823	2.75395	2.13062e-14	NA	GO:0004553(hydrolase activity, hydrolyzing O-glycosyl compounds);GO:0005576(extracellular region);GO:0005618(cell wall);GO:0005975(carbohydrate metabolic process);GO:0006073(cellular glucan metabolic process);GO:0008152(metabolic process);GO:0010411(xyloglucan metabolic process);GO:0016740(transferase activity);GO:0016762(xyloglucan:xyloglucosyl transferase activity);GO:0016787(hydrolase activity…
HORVU2Hr1G103040	polyphenol oxidase	0	1	0	1	6.03613	1	-14.5404	4.81587e-29	-8.54497	3.23054e-17	-6.64679	7.47145e-09	00350(Tyrosine metabolism);00950(Isoquinoline alkaloid biosynthesis);00950(Isoquinoline alkaloid biosynthesis)	GO:0004097(catechol oxidase activity);GO:0016491(oxidoreductase activity);GO:0046872(metal ion binding);GO:0055114(oxidation-reduction process);GO:0055114(oxidation-reduction process)
HORVU7Hr1G103560	polyubiquitin 3 [Sesamum indicum]	1.67467	0.000167031	1.46235	0.00522906	0.858765	0.0801294	2.50696	5.661e-08	2.66433	3.48877e-06	1.59615	0.0012661	NA	NA
HORVU5Hr1G059200	potassium transporter 23	1.01972	0.0191837	0.85579	0.0391322	0.72248	0.0351366	1.44302	5.33892e-05	2.08007	8.80739e-08	1.75164	3.78984e-08	NA	GO:0006811(ion transport);GO:0006813(potassium ion transport);GO:0009507(chloroplast);GO:0015079(potassium ion transmembrane transporter activity);GO:0016020(membrane);GO:0016021(integral component of membrane);GO:0071805(potassium ion transmembrane transport);GO:0071805(potassium ion transmembrane transport)
HORVU5Hr1G112850	predicted protein	-0.778402	7.45802e-06	-1.92968	1.86986e-09	-2.74045	2.3357e-13	-1.23234	7.83965e-10	-1.73905	1.58759e-09	-2.92062	8.45076e-13	00010(Glycolysis / Gluconeogenesis);00020(Citrate cycle (TCA cycle));00620(Pyruvate metabolism);00620(Pyruvate metabolism)	GO:0016740(transferase activity);GO:0016746(transferase activity, transferring acyl groups);GO:0016746(transferase activity, transferring acyl groups)
HORVU1Hr1G023060	predicted protein	-0.837037	1.11683e-06	-1.96505	1.39421e-09	-2.57036	1.46087e-13	-1.34018	2.23847e-10	-1.8986	1.06439e-10	-2.96373	1.26035e-13	00010(Glycolysis / Gluconeogenesis);00020(Citrate cycle (TCA cycle));00620(Pyruvate metabolism);00630(Glyoxylate and dicarboxylate metabolism);00640(Propanoate metabolism);00260(Glycine, serine and threonine metabolism);00280(Valine, leucine and isoleucine degradation);00280(Valine, leucine and isoleucine degradation)	GO:0000166(nucleotide binding);GO:0004148(dihydrolipoyl dehydrogenase activity);GO:0005623(cell);GO:0009055(electron transfer activity);GO:0016491(oxidoreductase activity);GO:0016668(oxidoreductase activity, acting on a sulfur group of donors, NAD(P) as acceptor);GO:0022900(electron transport chain);GO:0045454(cell redox homeostasis);GO:0050660(flavin adenine dinucleotide binding);GO:0055114(oxid…
HORVU4Hr1G078210	predicted protein	2.04693	0.0104441	5.96802	3.18154e-13	6.1576	5.45149e-15	2.95275	2.52226e-05	6.41569	1.42625e-15	6.69981	2.47601e-19	00010(Glycolysis / Gluconeogenesis);00030(Pentose phosphate pathway);00051(Fructose and mannose metabolism);00052(Galactose metabolism);03018(RNA degradation);03018(RNA degradation)	GO:0005215(transporter activity);GO:0016020(membrane);GO:0016021(integral component of membrane);GO:0016021(integral component of membrane)
HORVU3Hr1G083360	predicted protein	-3.36381	0.000339292	-0.47761	0.474136	-1.30334	0.0583963	-3.21477	1.50263e-13	-2.08162	0.000241044	-2.10504	0.000445263	00010(Glycolysis / Gluconeogenesis);00030(Pentose phosphate pathway);00051(Fructose and mannose metabolism);00710(Carbon fixation in photosynthetic organisms);00710(Carbon fixation in photosynthetic organisms)	NA
HORVU4Hr1G078470	predicted protein	-0.723403	0.028664	-1.77501	0.0022222	-1.84464	0.003311	-1.7775	2.40011e-10	-3.09334	1.71355e-12	-1.89086	6.4369e-05	00010(Glycolysis / Gluconeogenesis);00071(Fatty acid degradation);00350(Tyrosine metabolism);00350(Tyrosine metabolism)	GO:0008270(zinc ion binding);GO:0016491(oxidoreductase activity);GO:0046872(metal ion binding);GO:0055114(oxidation-reduction process);GO:0055114(oxidation-reduction process)
HORVU5Hr1G099820	predicted protein	0.797296	0.0325899	1.21461	0.000913673	1.42734	3.08242e-06	1.15804	0.000501489	2.07633	2.30383e-09	2.13792	7.62864e-11	00020(Citrate cycle (TCA cycle));00630(Glyoxylate and dicarboxylate metabolism);00630(Glyoxylate and dicarboxylate metabolism)	GO:0006099(tricarboxylic acid cycle);GO:0016740(transferase activity);GO:0046912(transferase activity, transferring acyl groups, acyl groups converted into alkyl on transfer);GO:0046912(transferase activity, transferring acyl groups, acyl groups converted into alkyl on transfer)
HORVU2Hr1G002880	predicted protein	3.96944	0.000109641	2.9232	0.00682655	4.8749	1.61723e-06	3.3935	0.00174032	3.79857	0.000654099	3.54987	0.000554312	00040(Pentose and glucuronate interconversions);00040(Pentose and glucuronate interconversions)	GO:0016829(lyase activity);GO:0030570(pectate lyase activity);GO:0045490(pectin catabolic process);GO:0046872(metal ion binding);GO:0046872(metal ion binding)
HORVU3Hr1G056440	predicted protein	0	1	0	1	0	1	-3.24185	1.61451e-10	-14.9966	7.5017e-19	-7.32717	1.06338e-10	00040(Pentose and glucuronate interconversions);00040(Pentose and glucuronate interconversions)	GO:0005618(cell wall);GO:0016787(hydrolase activity);GO:0030599(pectinesterase activity);GO:0042545(cell wall modification);GO:0045330(aspartyl esterase activity);GO:0045330(aspartyl esterase activity)
HORVU3Hr1G003950	predicted protein	2.4033	8.66903e-08	1.62188	0.00696884	1.85666	6.32083e-05	3.79333	1.58674e-15	3.46764	2.77043e-10	3.45569	5.03695e-13	00051(Fructose and mannose metabolism);00520(Amino sugar and nucleotide sugar metabolism);00520(Amino sugar and nucleotide sugar metabolism)	GO:0004476(mannose-6-phosphate isomerase activity);GO:0005975(carbohydrate metabolic process);GO:0008270(zinc ion binding);GO:0009298(GDP-mannose biosynthetic process);GO:0009298(GDP-mannose biosynthetic process)
HORVU7Hr1G093940	predicted protein	1.44481	0.017538	3.24642	7.10902e-08	4.14652	1.11576e-22	2.36418	8.05202e-05	3.19659	4.54461e-07	4.49507	1.32836e-19	00052(Galactose metabolism);00500(Starch and sucrose metabolism)	GO:0016491(oxidoreductase activity);GO:0050660(flavin adenine dinucleotide binding);GO:0055114(oxidation-reduction process);GO:0071949(FAD binding)
HORVU2Hr1G089160	predicted protein	-0.450498	0.00430245	-1.29683	0.000154465	-2.14491	5.64834e-08	-1.16789	2.86786e-10	-1.60647	6.98605e-08	-3.49818	2.30503e-15	00061(Fatty acid biosynthesis);00780(Biotin metabolism);00780(Biotin metabolism)	GO:0005737(cytoplasm);GO:0006633(fatty acid biosynthetic process);GO:0016836(hydro-lyase activity);GO:0016836(hydro-lyase activity)
HORVU1Hr1G083910	predicted protein	-2.37948	1	-3.34169	1	-4.21324	1	-1.88053	8.25434e-05	-4.22666	5.75631e-09	-3.12767	6.61168e-05	00061(Fatty acid biosynthesis);01040(Biosynthesis of unsaturated fatty acids);00780(Biotin metabolism);00333(Prodigiosin biosyntheses)	GO:0016491(oxidoreductase activity);GO:0055114(oxidation-reduction process)
HORVU3Hr1G091320	predicted protein	1.15346	0.00142264	-0.300027	0.288947	-2.82927	6.21689e-07	1.69002	7.29785e-07	2.27591	3.51441e-08	1.94011	2.40751e-09	00061(Fatty acid biosynthesis);01040(Biosynthesis of unsaturated fatty acids);01040(Biosynthesis of unsaturated fatty acids)	GO:0006631(fatty acid metabolic process);GO:0016020(membrane);GO:0016491(oxidoreductase activity);GO:0045300(acyl-[acyl-carrier-protein] desaturase activity);GO:0046872(metal ion binding);GO:0055114(oxidation-reduction process);GO:0055114(oxidation-reduction process)
HORVU3Hr1G092740	predicted protein	0.312355	0.963514	-6.91684	1.41058e-09	-14.311	2.1487e-16	-6.9169	5.39908e-14	-13.6046	2.99013e-14	-13.6046	2.58821e-12	00061(Fatty acid biosynthesis);01040(Biosynthesis of unsaturated fatty acids);01040(Biosynthesis of unsaturated fatty acids)	GO:0006631(fatty acid metabolic process);GO:0016491(oxidoreductase activity);GO:0045300(acyl-[acyl-carrier-protein] desaturase activity);GO:0046872(metal ion binding);GO:0055114(oxidation-reduction process);GO:0055114(oxidation-reduction process)
HORVU3Hr1G061520	predicted protein	0.549521	0.64589	-5.83815	5.49568e-09	-14.2567	3.74422e-16	-4.54455	8.04318e-08	-13.2034	8.44369e-13	-13.2034	3.71514e-11	00061(Fatty acid biosynthesis);01040(Biosynthesis of unsaturated fatty acids);01040(Biosynthesis of unsaturated fatty acids)	GO:0006631(fatty acid metabolic process);GO:0016491(oxidoreductase activity);GO:0045300(acyl-[acyl-carrier-protein] desaturase activity);GO:0046872(metal ion binding);GO:0055114(oxidation-reduction process);GO:0055114(oxidation-reduction process)
HORVU6Hr1G091130	predicted protein	1.01346	0.00374649	1.76525	2.39631e-06	2.13539	1.05303e-10	1.36299	3.37224e-05	2.30709	5.46014e-11	2.49039	8.69491e-14	00071(Fatty acid degradation);00592(alpha-Linolenic acid metabolism);01040(Biosynthesis of unsaturated fatty acids);00280(Valine, leucine and isoleucine degradation);04146(Peroxisome);04146(Peroxisome)	GO:0003824(catalytic activity);GO:0016740(transferase activity);GO:0016746(transferase activity, transferring acyl groups);GO:0016747(transferase activity, transferring acyl groups other than amino-acyl groups);GO:0016747(transferase activity, transferring acyl groups other than amino-acyl groups)
HORVU3Hr1G074840	predicted protein	12.4302	6.32461e-12	11.2452	1	11.8405	3.44478e-10	12.9993	7.44188e-18	11.9876	4.55729e-11	12.0688	6.08312e-09	00073(Cutin, suberine and wax biosynthesis);00073(Cutin, suberine and wax biosynthesis)	GO:0004144(diacylglycerol O-acyltransferase activity);GO:0016020(membrane);GO:0016021(integral component of membrane);GO:0016021(integral component of membrane)
HORVU7Hr1G002200	predicted protein	13.4907	5.30478e-21	14.4164	3.4894e-16	9.47993	1	8.87666	5.61433e-20	9.44082	3.90796e-23	6.31233	0.000290943	00195(Photosynthesis);00195(Photosynthesis)	GO:0016020(membrane);GO:0016021(integral component of membrane);GO:0022857(transmembrane transporter activity);GO:0055085(transmembrane transport);GO:0055085(transmembrane transport)
HORVU2Hr1G052690	predicted protein	-0.434815	0.0649621	-1.54347	0.00141176	-1.78603	0.000414513	-1.33686	1.2463e-05	-1.56116	0.00033981	-2.08277	0.000273628	00195(Photosynthesis);00195(Photosynthesis)	GO:0005515(protein binding);GO:0009522(photosystem I);GO:0009579(thylakoid);GO:0015979(photosynthesis);GO:0016020(membrane);GO:0016021(integral component of membrane);GO:0016021(integral component of membrane)
HORVU0Hr1G003270	predicted protein	-0.638397	1	-1.38881	1	-3.41379	1	-1.93984	0.00208308	-3.75626	2.03814e-05	-3.26378	0.0014779	00195(Photosynthesis);00195(Photosynthesis)	GO:0005509(calcium ion binding);GO:0009523(photosystem II);GO:0009654(photosystem II oxygen evolving complex);GO:0015979(photosynthesis);GO:0019898(extrinsic component of membrane);GO:0019898(extrinsic component of membrane)
HORVU1Hr1G065620	predicted protein	0.986204	0.201055	0.621255	0.38173	0.777676	0.0949509	2.87523	8.0089e-09	3.02402	1.1986e-11	3.14469	1.50508e-13	00220(Arginine biosynthesis);00220(Arginine biosynthesis)	GO:0006629(lipid metabolic process);GO:0008970(phospholipase A1 activity);GO:0016787(hydrolase activity);GO:0016787(hydrolase activity)
HORVU7Hr1G051070	predicted protein	0.486547	0.454962	0.416738	0.364859	0.188469	0.43563	1.38748	3.45667e-05	1.60745	2.57327e-06	1.34252	1.3027e-05	00220(Arginine biosynthesis);00220(Arginine biosynthesis)	GO:0004046(aminoacylase activity);GO:0005737(cytoplasm);GO:0005773(vacuole);GO:0005783(endoplasmic reticulum);GO:0005794(Golgi apparatus);GO:0006508(proteolysis);GO:0006520(cellular amino acid metabolic process);GO:0008237(metallopeptidase activity);GO:0010043(response to zinc ion);GO:0016787(hydrolase activity);GO:0016787(hydrolase activity)
HORVU0Hr1G023760	predicted protein	0.134111	0.630124	1.91672	0.000233295	2.97292	3.07105e-17	1.58673	0.00134223	2.14691	3.63505e-05	3.93281	1.80351e-16	00220(Arginine biosynthesis);00220(Arginine biosynthesis)	GO:0016020(membrane);GO:0016021(integral component of membrane);GO:0016021(integral component of membrane)
HORVU5Hr1G027570	predicted protein	1.4371	1.29577e-06	0.93083	0.0130089	0.959029	0.000982099	1.14121	0.000543166	1.23481	0.000667759	1.17012	7.6515e-05	00230(Purine metabolism);00230(Purine metabolism)	GO:0004385(guanylate kinase activity);GO:0006163(purine nucleotide metabolic process);GO:0046037(GMP metabolic process);GO:0046710(GDP metabolic process);GO:0046710(GDP metabolic process)
HORVU7Hr1G022250	predicted protein	10.9983	1	12.0812	1.30148e-08	11.8388	1	6.69612	6.36629e-10	8.2217	3.17709e-15	6.94572	7.41901e-08	00230(Purine metabolism);00240(Pyrimidine metabolism);00240(Pyrimidine metabolism)	GO:0016787(hydrolase activity);GO:0016787(hydrolase activity)
HORVU1Hr1G071470	predicted protein	0.693664	0.126166	0.847943	0.0275177	1.30139	1.80694e-05	1.17294	0.00023051	1.72127	1.21584e-06	1.43792	6.16729e-07	00230(Purine metabolism);00240(Pyrimidine metabolism);00240(Pyrimidine metabolism)	GO:0009901(anther dehiscence);GO:0010584(pollen exine formation);GO:0016020(membrane);GO:0016021(integral component of membrane);GO:0016787(hydrolase activity);GO:0016787(hydrolase activity)
HORVU6Hr1G071930	predicted protein	-0.33088	0.00751963	-1.12186	0.000225889	-1.56426	4.718e-06	-1.08427	7.13451e-09	-1.54133	7.46105e-08	-2.31685	1.12991e-09	00230(Purine metabolism);00240(Pyrimidine metabolism);03020(RNA polymerase);03020(RNA polymerase)	GO:0000166(nucleotide binding);GO:0003824(catalytic activity);GO:0006352(DNA-templated transcription, initiation);GO:0030880(RNA polymerase complex);GO:0044237(cellular metabolic process);GO:0044237(cellular metabolic process)
HORVU2Hr1G121070	predicted protein	0.0776136	0.486249	0.54987	0.369456	0.449815	0.229378	1.47652	0.0017845	2.10014	2.29468e-05	2.03849	5.04384e-07	00230(Purine metabolism);00730(Thiamine metabolism);00730(Thiamine metabolism)	GO:0004017(adenylate kinase activity);GO:0005524(ATP binding);GO:0006139(nucleobase-containing compound metabolic process);GO:0016301(kinase activity);GO:0016310(phosphorylation);GO:0016740(transferase activity);GO:0016776(phosphotransferase activity, phosphate group as acceptor);GO:0019205(nucleobase-containing compound kinase activity);GO:0046940(nucleoside monophosphate phosphorylation);GO:004…
HORVU1Hr1G020430	predicted protein	1.23386	1	3.90011	4.96183e-05	4.96093	3.52578e-08	2.82572	0.000139568	3.76102	6.53919e-06	5.99266	4.60844e-14	00270(Cysteine and methionine metabolism)	GO:0016491(oxidoreductase activity);GO:0046872(metal ion binding);GO:0055114(oxidation-reduction process)
HORVU1Hr1G020410	predicted protein	1.42068	1	4.18477	9.23706e-06	5.4148	5.25566e-11	2.55139	0.000448652	3.59021	5.33101e-06	5.45907	3.63897e-17	00270(Cysteine and methionine metabolism);00270(Cysteine and methionine metabolism)	GO:0016491(oxidoreductase activity);GO:0046872(metal ion binding);GO:0055114(oxidation-reduction process);GO:0055114(oxidation-reduction process)
HORVU4Hr1G079830	predicted protein	0.814505	0.0508681	1.0775	0.00693466	0.741452	0.0168625	2.26576	4.79876e-12	2.14355	1.98414e-09	1.83302	6.49358e-08	00270(Cysteine and methionine metabolism);00450(Selenocompound metabolism);00450(Selenocompound metabolism)	GO:0016020(membrane);GO:0016021(integral component of membrane);GO:0016021(integral component of membrane)
HORVU2Hr1G003840	predicted protein	-0.876357	0.0414272	-3.07987	2.29926e-05	-9.29203	1.16144e-35	-3.40308	3.79218e-13	-5.9965	6.6631e-12	-7.25853	2.20815e-12	00330(Arginine and proline metabolism);00360(Phenylalanine metabolism);00380(Tryptophan metabolism);00380(Tryptophan metabolism)	NA
HORVU7Hr1G118240	predicted protein	0.865019	0.0736056	0.347604	0.640899	0.400394	0.2014	2.20764	1.5095e-12	1.61975	0.000347893	2.13156	9.02825e-11	00330(Arginine and proline metabolism);00410(beta-Alanine metabolism);00410(beta-Alanine metabolism)	GO:0016491(oxidoreductase activity);GO:0055114(oxidation-reduction process);GO:0055114(oxidation-reduction process)
HORVU7Hr1G118260	predicted protein	1.49864	0.00681075	-0.177898	0.623471	3.10846	8.34245e-13	2.44676	2.2038e-05	2.12673	0.003081	2.41577	3.55102e-05	00330(Arginine and proline metabolism);00410(beta-Alanine metabolism);00410(beta-Alanine metabolism)	GO:0016491(oxidoreductase activity);GO:0055114(oxidation-reduction process);GO:0055114(oxidation-reduction process)
HORVU3Hr1G075040	predicted protein	1.70908	0.126167	5.8091	6.82944e-13	7.61889	3.9538e-21	2.60757	8.0512e-05	5.01977	7.38865e-12	6.43211	6.44755e-29	00350(Tyrosine metabolism);00360(Phenylalanine metabolism);00380(Tryptophan metabolism);00901(Indole alkaloid biosynthesis);00950(Isoquinoline alkaloid biosynthesis);00965(Betalain biosynthesis)	GO:0003824(catalytic activity);GO:0006520(cellular amino acid metabolic process);GO:0016829(lyase activity);GO:0016831(carboxy-lyase activity);GO:0019752(carboxylic acid metabolic process);GO:0030170(pyridoxal phosphate binding)
HORVU7Hr1G093630	predicted protein	1.97654	9.65693e-06	1.42331	0.00638785	-0.561057	0.446686	2.85029	1.15483e-11	4.4025	6.92924e-10	4.02373	1.97028e-20	00360(Phenylalanine metabolism);00130(Ubiquinone and other terpenoid-quinone biosynthesis);00940(Phenylpropanoid biosynthesis);00945(Stilbenoid, diarylheptanoid and gingerol biosynthesis);00941(Flavonoid biosynthesis);00941(Flavonoid biosynthesis)	GO:0004497(monooxygenase activity);GO:0005506(iron ion binding);GO:0016491(oxidoreductase activity);GO:0016705(oxidoreductase activity, acting on paired donors, with incorporation or reduction of molecular oxygen);GO:0020037(heme binding);GO:0046872(metal ion binding);GO:0055114(oxidation-reduction process);GO:0055114(oxidation-reduction process)
HORVU1Hr1G048860	predicted protein	2.0549	5.36921e-05	1.95345	0.000428466	0.672594	0.174913	3.31587	6.78193e-18	2.75795	9.77092e-09	1.61517	0.000264833	00400(Phenylalanine, tyrosine and tryptophan biosynthesis)	GO:0004664(prephenate dehydratase activity);GO:0009094(L-phenylalanine biosynthetic process)
HORVU6Hr1G075420	predicted protein	-1.03917	2.97549e-05	-0.969142	0.0075454	-1.17554	0.00307976	-1.74322	1.04818e-14	-1.71116	3.14761e-09	-1.89979	2.4681e-07	00400(Phenylalanine, tyrosine and tryptophan biosynthesis);00400(Phenylalanine, tyrosine and tryptophan biosynthesis)	NA
HORVU1Hr1G056160	predicted protein	-0.791882	0.000808039	-1.84053	5.51531e-05	-2.82131	3.11362e-09	-1.05149	1.2871e-05	-2.35954	4.4737e-07	-2.95613	6.85731e-09	00400(Phenylalanine, tyrosine and tryptophan biosynthesis);00400(Phenylalanine, tyrosine and tryptophan biosynthesis)	GO:0003735(structural constituent of ribosome);GO:0005622(intracellular);GO:0005840(ribosome);GO:0006412(translation);GO:0006412(translation)
HORVU1Hr1G018600	predicted protein	-0.206549	0.326772	1.08097	0.114699	0.522923	0.375363	2.25131	0.000105411	2.42149	0.00103426	2.95423	1.30433e-07	00402(Benzoxazinoid biosynthesis);00402(Benzoxazinoid biosynthesis)	GO:0016491(oxidoreductase activity);GO:0046872(metal ion binding);GO:0055114(oxidation-reduction process);GO:0055114(oxidation-reduction process)
HORVU7Hr1G087860	predicted protein	0	1	0	1	0	1	4.78106	1.20241e-07	4.51306	8.27641e-06	4.06574	7.73998e-05	00440(Phosphonate and phosphinate metabolism);00440(Phosphonate and phosphinate metabolism)	NA
HORVU6Hr1G059730	predicted protein	1.34287	0.00179129	0.765192	0.157862	-0.0497757	0.990631	2.35507	9.53852e-12	1.79094	0.000121451	1.70163	8.4364e-05	00460(Cyanoamino acid metabolism);00460(Cyanoamino acid metabolism)	GO:0006807(nitrogen compound metabolic process);GO:0016810(hydrolase activity, acting on carbon-nitrogen (but not peptide) bonds);GO:0016810(hydrolase activity, acting on carbon-nitrogen (but not peptide) bonds)
HORVU3Hr1G117390	predicted protein	5.92005	9.47235e-12	4.97649	1.94093e-07	2.76171	0.0142691	4.08558	1.73226e-11	5.81397	1.16275e-30	3.42121	8.89448e-09	00480(Glutathione metabolism)	GO:0005515(protein binding)
HORVU0Hr1G019300	predicted protein	1.57852	0.14188	5.79627	2.37621e-10	5.65494	1.19778e-11	3.77696	3.45344e-11	8.662	5.54553e-42	9.44628	2.02029e-61	00480(Glutathione metabolism)	GO:0005515(protein binding)
HORVU3Hr1G117370	predicted protein	5.07552	3.70953e-25	4.14539	4.84078e-12	1.78211	0.0280783	4.49696	4.87688e-06	6.22977	2.07246e-11	3.8393	6.61969e-05	00480(Glutathione metabolism);00480(Glutathione metabolism)	GO:0005515(protein binding);GO:0016740(transferase activity);GO:0016740(transferase activity)
HORVU3Hr1G107280	predicted protein	2.00742	0.00929323	2.96936	3.67981e-06	3.21571	4.48882e-09	2.83117	2.61723e-05	2.7737	0.00102155	3.34353	9.01318e-07	00480(Glutathione metabolism);00480(Glutathione metabolism)	NA
HORVU3Hr1G064320	predicted protein	1.33011	0.130777	4.37002	1.20364e-08	5.23108	4.20951e-11	2.42847	0.00218521	4.48775	1.09647e-06	6.33709	6.21144e-21	00480(Glutathione metabolism);00480(Glutathione metabolism)	GO:0005515(protein binding);GO:0005515(protein binding)
HORVU7Hr1G039140	predicted protein	-9.88805	1	-9.88805	1	-9.88805	1	-6.69956	7.54589e-12	-6.17175	9.86465e-09	-12.2712	3.73947e-10	00480(Glutathione metabolism);00480(Glutathione metabolism)	GO:0005515(protein binding);GO:0005515(protein binding)
HORVU5Hr1G012320	predicted protein	9.51889	1	12.7762	1	12.7174	1.55168e-10	12.3697	1.41402e-11	13.3909	1.59193e-08	14.8849	1.81333e-18	00500(Starch and sucrose metabolism);00500(Starch and sucrose metabolism)	GO:0007015(actin filament organization);GO:0051015(actin filament binding);GO:0051015(actin filament binding)
HORVU6Hr1G077010	predicted protein	-0.576882	0.18815	3.36245	8.14022e-05	4.52281	4.22206e-10	3.57779	5.38393e-10	5.14585	1.64004e-16	7.00129	1.42345e-41	00500(Starch and sucrose metabolism);00500(Starch and sucrose metabolism)	GO:0000272(polysaccharide catabolic process);GO:0003824(catalytic activity);GO:0004553(hydrolase activity, hydrolyzing O-glycosyl compounds);GO:0005975(carbohydrate metabolic process);GO:0008152(metabolic process);GO:0008810(cellulase activity);GO:0016787(hydrolase activity);GO:0016798(hydrolase activity, acting on glycosyl bonds);GO:0030245(cellulose catabolic process);GO:0030245(cellulose catab…
HORVU3Hr1G084170	predicted protein	1.78436	0.0038194	3.04795	7.32216e-08	2.39287	6.9393e-06	2.65575	2.83908e-09	2.49123	1.05019e-05	2.8557	1.73736e-09	00500(Starch and sucrose metabolism);00500(Starch and sucrose metabolism)	GO:0004553(hydrolase activity, hydrolyzing O-glycosyl compounds);GO:0005975(carbohydrate metabolic process);GO:0016787(hydrolase activity);GO:0016787(hydrolase activity)
HORVU7Hr1G091100	predicted protein	10.4819	1	11.9286	1.77299e-09	9.6679	1	4.51759	4.49627e-05	4.98274	2.01025e-06	5.77413	1.33226e-08	00500(Starch and sucrose metabolism);00500(Starch and sucrose metabolism)	GO:0004553(hydrolase activity, hydrolyzing O-glycosyl compounds);GO:0005975(carbohydrate metabolic process);GO:0016787(hydrolase activity);GO:0016787(hydrolase activity)
HORVU4Hr1G068960	predicted protein	-0.907697	0.0142156	0.890479	0.138948	0.972178	0.042974	1.4387	0.00233744	1.99264	0.000143897	2.5673	3.26563e-10	00500(Starch and sucrose metabolism);00500(Starch and sucrose metabolism)	GO:0004553(hydrolase activity, hydrolyzing O-glycosyl compounds);GO:0005975(carbohydrate metabolic process);GO:0016787(hydrolase activity);GO:0016787(hydrolase activity)
HORVU5Hr1G041930	predicted protein	1.89664	2.14706e-05	1.45129	0.0131021	1.92954	5.92401e-05	2.60638	4.91787e-12	2.24992	3.75311e-06	1.63258	0.000668159	00940(Phenylpropanoid biosynthesis);00500(Starch and sucrose metabolism);00500(Starch and sucrose metabolism)	GO:0005515(protein binding);GO:0005515(protein binding)
HORVU5Hr1G096090	predicted protein	-3.02851	1	-5.31157	1	-2.58106	1	-3.28624	2.19973e-07	-4.73625	1.67768e-06	-12.7731	3.9782e-11	00500(Starch and sucrose metabolism);00500(Starch and sucrose metabolism)	GO:0016020(membrane);GO:0016021(integral component of membrane);GO:0016021(integral component of membrane)
HORVU6Hr1G094880	predicted protein	-2.84558	5.84641e-10	-3.29036	8.8011e-09	-0.161866	0.806704	-1.13171	0.00015611	-2.45264	1.29699e-07	-1.84647	0.000439695	00500(Starch and sucrose metabolism);00500(Starch and sucrose metabolism)	GO:0005985(sucrose metabolic process);GO:0016157(sucrose synthase activity);GO:0016740(transferase activity);GO:0016757(transferase activity, transferring glycosyl groups);GO:0016757(transferase activity, transferring glycosyl groups)
HORVU1Hr1G023520	predicted protein	-0.00344617	0.253743	0.799225	0.0753356	0.923291	0.00755581	2.12048	2.60883e-09	2.25964	2.20458e-07	2.07117	9.61479e-10	00511(Other glycan degradation);04144(Endocytosis);04144(Endocytosis)	NA
HORVU1Hr1G023510	predicted protein	0.841033	0.160836	1.09242	0.0344129	1.52727	0.000176765	1.39307	0.00144413	1.55131	0.00160526	2.24692	7.12738e-10	00511(Other glycan degradation);04144(Endocytosis);04144(Endocytosis)	GO:0016020(membrane);GO:0016021(integral component of membrane);GO:0016788(hydrolase activity, acting on ester bonds);GO:0016788(hydrolase activity, acting on ester bonds)
HORVU3Hr1G094140	predicted protein	1.45149	2.31933e-05	0.511407	0.307198	1.68495	8.55072e-08	2.6177	8.56003e-17	2.40661	2.60519e-06	2.5515	6.42473e-10	00514(Other types of O-glycan biosynthesis);00514(Other types of O-glycan biosynthesis)	NA
HORVU3Hr1G002920	predicted protein	1.15824	0.100106	2.98776	7.79445e-07	3.74891	4.88274e-12	2.20715	3.44595e-07	3.19741	1.43111e-07	4.97862	4.97372e-30	00514(Other types of O-glycan biosynthesis);00514(Other types of O-glycan biosynthesis)	GO:0016020(membrane);GO:0016021(integral component of membrane);GO:0016757(transferase activity, transferring glycosyl groups);GO:0016757(transferase activity, transferring glycosyl groups)
HORVU5Hr1G006290	predicted protein	2.15803	1.00605e-09	1.1806	0.0121842	0.927984	0.00958371	2.45135	2.78267e-13	2.28255	4.15188e-06	1.82358	3.67411e-07	00515(Mannose type O-glycan biosyntheis);00515(Mannose type O-glycan biosyntheis)	GO:0016020(membrane);GO:0016021(integral component of membrane);GO:0016757(transferase activity, transferring glycosyl groups);GO:0016757(transferase activity, transferring glycosyl groups)
HORVU5Hr1G053930	predicted protein	1.45904	0.0261221	2.72007	4.17087e-05	3.40483	9.8507e-13	2.68652	3.12288e-06	3.79011	8.76388e-11	3.85517	8.30792e-13	00515(Mannose type O-glycan biosyntheis);00515(Mannose type O-glycan biosyntheis)	GO:0016757(transferase activity, transferring glycosyl groups);GO:0016757(transferase activity, transferring glycosyl groups)
HORVU3Hr1G084250	predicted protein	13.7497	1.09535e-10	15.2866	2.47015e-12	13.6455	1	4.19144	1.21374e-05	5.69376	5.41633e-07	6.79892	3.71745e-10	00520(Amino sugar and nucleotide sugar metabolism)	GO:0004553(hydrolase activity, hydrolyzing O-glycosyl compounds);GO:0005975(carbohydrate metabolic process);GO:0008152(metabolic process);GO:0016787(hydrolase activity);GO:0016798(hydrolase activity, acting on glycosyl bonds)
HORVU2Hr1G104110	predicted protein	0.671888	0.144395	1.29239	0.00139951	1.24099	0.000327045	1.43665	5.05295e-06	2.32951	6.00155e-11	2.69327	7.48447e-15	00520(Amino sugar and nucleotide sugar metabolism);00520(Amino sugar and nucleotide sugar metabolism)	GO:0003824(catalytic activity);GO:0003978(UDP-glucose 4-epimerase activity);GO:0006012(galactose metabolic process);GO:0016020(membrane);GO:0016021(integral component of membrane);GO:0016853(isomerase activity);GO:0050662(coenzyme binding);GO:0050662(coenzyme binding)
HORVU0Hr1G016310	predicted protein	0.297267	1	6.95454	4.99786e-15	8.14107	1.34266e-23	2.55303	0.00193614	5.75886	7.32697e-11	6.36717	3.00404e-22	00520(Amino sugar and nucleotide sugar metabolism);00520(Amino sugar and nucleotide sugar metabolism)	GO:0004568(chitinase activity);GO:0005975(carbohydrate metabolic process);GO:0006032(chitin catabolic process);GO:0016998(cell wall macromolecule catabolic process);GO:0016998(cell wall macromolecule catabolic process)
HORVU3Hr1G064470	predicted protein	0.764904	0.162224	1.11764	0.0691794	1.59752	0.00015174	4.56156	1.65991e-16	7.60687	3.9658e-29	8.00683	1.81008e-47	00520(Amino sugar and nucleotide sugar metabolism);04016(MAPK signaling pathway - plant);04016(MAPK signaling pathway - plant)	GO:0000272(polysaccharide catabolic process);GO:0004568(chitinase activity);GO:0005975(carbohydrate metabolic process);GO:0006032(chitin catabolic process);GO:0006952(defense response);GO:0008061(chitin binding);GO:0008152(metabolic process);GO:0016787(hydrolase activity);GO:0016798(hydrolase activity, acting on glycosyl bonds);GO:0016998(cell wall macromolecule catabolic process);GO:0016998(cell…
HORVU1Hr1G076470	predicted protein	-0.14449	0.0801167	0.187768	0.873356	-0.306873	0.493188	1.27099	0.000730234	1.54995	0.000121578	1.39004	0.00019073	00790(Folate biosynthesis);00040(Pentose and glucuronate interconversions);00052(Galactose metabolism);00053(Ascorbate and aldarate metabolism);00520(Amino sugar and nucleotide sugar metabolism);00520(Amino sugar and nucleotide sugar metabolism)	GO:0000943(retrotransposon nucleocapsid);GO:0006508(proteolysis);GO:0008242(omega peptidase activity);GO:0016787(hydrolase activity);GO:0034722(gamma-glutamyl-peptidase activity);GO:0034722(gamma-glutamyl-peptidase activity)
HORVU5Hr1G019650	predicted protein	0.771352	0.132614	1.30102	0.00185161	0.163974	0.530442	1.79783	1.9125e-05	2.59894	1.44994e-08	1.34719	0.000742027	00531(Glycosaminoglycan degradation);00531(Glycosaminoglycan degradation)	GO:0016020(membrane);GO:0016798(hydrolase activity, acting on glycosyl bonds);GO:0016798(hydrolase activity, acting on glycosyl bonds)
HORVU3Hr1G071400	predicted protein	7.50212	7.24173e-31	6.36261	4.92536e-16	2.0772	1	6.20048	4.94866e-26	5.30652	4.92256e-11	3.81317	1.471e-05	00561(Glycerolipid metabolism);00280(Valine, leucine and isoleucine degradation);00280(Valine, leucine and isoleucine degradation)	GO:0016788(hydrolase activity, acting on ester bonds);GO:0016788(hydrolase activity, acting on ester bonds)
HORVU3Hr1G027160	predicted protein	0.288038	0.912337	1.33025	0.00192965	2.35633	2.44702e-10	1.10219	0.00156896	1.87365	5.94364e-06	3.08529	1.84262e-14	00561(Glycerolipid metabolism);00561(Glycerolipid metabolism)	GO:0005783(endoplasmic reticulum);GO:0005794(Golgi apparatus);GO:0016020(membrane);GO:0016021(integral component of membrane);GO:0016021(integral component of membrane)
HORVU4Hr1G044140	predicted protein	1.69229	0.00800694	-1.63436	0.0298744	-4.02935	4.86532e-07	-2.53599	9.83471e-20	-5.70877	2.77198e-21	-5.26333	2.36368e-12	00561(Glycerolipid metabolism);00561(Glycerolipid metabolism)	GO:0009247(glycolipid biosynthetic process);GO:0016758(transferase activity, transferring hexosyl groups);GO:0016758(transferase activity, transferring hexosyl groups)
HORVU4Hr1G060440	predicted protein	-0.967719	5.33744e-07	-3.61172	1.12313e-22	-3.42753	6.6414e-19	-1.5749	5.3407e-15	-3.60006	1.97644e-27	-4.00198	3.79626e-23	00561(Glycerolipid metabolism);00561(Glycerolipid metabolism)	NA
HORVU5Hr1G060070	predicted protein	0.579358	0.386453	0.917286	0.0344247	1.09045	0.00118417	1.29253	0.000531024	2.03658	2.09756e-07	2.3056	9.91525e-13	00563(Glycosylphosphatidylinositol(GPI)-anchor biosynthesis);00563(Glycosylphosphatidylinositol(GPI)-anchor biosynthesis)	NA
HORVU7Hr1G058860	predicted protein	-0.802799	0.050328	-1.33503	0.140441	-2.57601	0.00138332	-1.06241	0.000105411	-2.73876	3.02826e-06	-3.16393	2.68118e-08	00564(Glycerophospholipid metabolism);00230(Purine metabolism);00230(Purine metabolism)	GO:0016787(hydrolase activity);GO:0016787(hydrolase activity)
HORVU7Hr1G049960	predicted protein	-0.0511886	0.145648	1.28885	0.00190644	2.18779	6.4727e-10	1.37967	7.00126e-05	2.66427	4.76979e-14	3.03621	1.49782e-18	00564(Glycerophospholipid metabolism);00564(Glycerophospholipid metabolism)	NA
HORVU7Hr1G072960	predicted protein	2.72679	1	8.38112	2.07285e-16	10.5287	5.91749e-44	3.11132	3.59369e-05	5.17837	4.99672e-11	6.69111	6.66878e-21	00564(Glycerophospholipid metabolism);00592(alpha-Linolenic acid metabolism)	GO:0006629(lipid metabolic process);GO:0016787(hydrolase activity)
HORVU1Hr1G001760	predicted protein	1.19731	0.00509639	1.35247	0.00227555	1.82188	1.33301e-07	1.77005	1.62406e-05	2.22966	6.0289e-06	2.17806	1.79449e-08	00564(Glycerophospholipid metabolism);04070(Phosphatidylinositol signaling system);04070(Phosphatidylinositol signaling system)	GO:0004605(phosphatidate cytidylyltransferase activity);GO:0016020(membrane);GO:0016021(integral component of membrane);GO:0016021(integral component of membrane)
HORVU5Hr1G093770	predicted protein	0.286102	0.90396	2.02777	0.00210414	3.08065	5.5341e-08	-2.76913	2.23949e-07	-2.57706	2.29412e-05	-2.21673	0.000805114	00591(Linoleic acid metabolism);00591(Linoleic acid metabolism)	GO:0005515(protein binding);GO:0006633(fatty acid biosynthetic process);GO:0016491(oxidoreductase activity);GO:0016702(oxidoreductase activity, acting on single donors with incorporation of molecular oxygen, incorporation of two atoms of oxygen);GO:0031408(oxylipin biosynthetic process);GO:0046872(metal ion binding);GO:0051213(dioxygenase activity);GO:0055114(oxidation-reduction process);GO:00551…
HORVU3Hr1G087570	predicted protein	2.38301	0.00338314	3.0901	0.000264527	2.88477	9.68187e-05	4.00032	4.92392e-08	4.21333	6.32265e-08	4.50607	1.512e-08	00904(Diterpenoid biosynthesis);00941(Flavonoid biosynthesis);00940(Phenylpropanoid biosynthesis);00940(Phenylpropanoid biosynthesis)	GO:0016491(oxidoreductase activity);GO:0046872(metal ion binding);GO:0051213(dioxygenase activity);GO:0055114(oxidation-reduction process);GO:0055114(oxidation-reduction process)
HORVU7Hr1G036070	predicted protein	-0.790261	0.0751318	2.80455	0.00111281	4.09457	4.45031e-07	2.52878	8.41314e-11	2.96679	1.05819e-10	5.78647	1.472e-21	00592(alpha-Linolenic acid metabolism);00592(alpha-Linolenic acid metabolism)	GO:0003824(catalytic activity);GO:0010181(FMN binding);GO:0016491(oxidoreductase activity);GO:0055114(oxidation-reduction process);GO:0055114(oxidation-reduction process)
HORVU6Hr1G081000	predicted protein	-0.122915	0.180903	-0.817723	0.0281953	-1.19491	0.00480423	1.99384	6.40177e-09	1.71122	0.00156903	2.0994	3.02891e-10	00592(alpha-Linolenic acid metabolism);00592(alpha-Linolenic acid metabolism)	GO:0007623(circadian rhythm);GO:0009416(response to light stimulus);GO:0009507(chloroplast);GO:0009611(response to wounding);GO:0009625(response to insect);GO:0009637(response to blue light);GO:0009646(response to absence of light);GO:0009651(response to salt stress);GO:0009695(jasmonic acid biosynthetic process);GO:0009723(response to ethylene);GO:0009734(auxin-activated signaling pathway);GO:00…
HORVU1Hr1G001850	predicted protein	3.07829	0.000211322	1.20798	0.380267	-2.92097	1	2.43181	1.1194e-06	3.03273	2.80573e-09	4.91588	1.70413e-08	00592(alpha-Linolenic acid metabolism);00592(alpha-Linolenic acid metabolism)	GO:0003824(catalytic activity);GO:0010181(FMN binding);GO:0016491(oxidoreductase activity);GO:0055114(oxidation-reduction process);GO:0055114(oxidation-reduction process)
HORVU3Hr1G055870	predicted protein	0.829637	0.0479006	0.929758	0.0300443	1.65908	8.81259e-07	2.07717	2.8985e-13	2.75634	1.16892e-13	1.95145	8.61821e-10	00600(Sphingolipid metabolism);00600(Sphingolipid metabolism)	GO:0017040(N-acylsphingosine amidohydrolase activity);GO:0046514(ceramide catabolic process);GO:0046514(ceramide catabolic process)
HORVU4Hr1G062740	predicted protein	0.839009	0.0315167	1.00171	0.0065812	0.415592	0.143956	1.47444	3.51945e-06	2.33886	7.2649e-12	2.13259	8.14186e-12	00600(Sphingolipid metabolism);00600(Sphingolipid metabolism)	GO:0003824(catalytic activity);GO:0005783(endoplasmic reticulum);GO:0009058(biosynthetic process);GO:0009793(embryo development ending in seed dormancy);GO:0009825(multidimensional cell growth);GO:0030170(pyridoxal phosphate binding);GO:0043067(regulation of programmed cell death);GO:0043067(regulation of programmed cell death)
HORVU5Hr1G057320	predicted protein	1.07108	0.00578656	0.496042	0.310026	-0.423369	0.406214	1.35623	4.90705e-05	2.04424	3.9055e-07	1.31195	6.91592e-05	00600(Sphingolipid metabolism);00600(Sphingolipid metabolism)	GO:0016020(membrane);GO:0016021(integral component of membrane);GO:0016021(integral component of membrane)
HORVU7Hr1G078770	predicted protein	-0.455465	0.0047683	-1.16366	0.000315157	-2.18856	9.41623e-08	-1.41407	2.84514e-12	-2.39905	2.4471e-13	-3.97552	4.37364e-20	00600(Sphingolipid metabolism);00650(Butanoate metabolism);00660(C5-Branched dibasic acid metabolism);00290(Valine, leucine and isoleucine biosynthesis);00770(Pantothenate and CoA biosynthesis);00770(Pantothenate and CoA biosynthesis)	GO:0003677(DNA binding);GO:0003700(DNA-binding transcription factor activity);GO:0005634(nucleus);GO:0006355(regulation of transcription, DNA-templated);GO:0044212(transcription regulatory region DNA binding);GO:0044212(transcription regulatory region DNA binding)
HORVU5Hr1G051010	predicted protein	-0.856764	0.130777	-2.19645	0.02294	-4.73815	6.67059e-07	-2.21864	4.69562e-05	-5.06547	5.95989e-11	-5.32262	7.4723e-12	00630(Glyoxylate and dicarboxylate metabolism);00710(Carbon fixation in photosynthetic organisms);00710(Carbon fixation in photosynthetic organisms)	GO:0004497(monooxygenase activity);GO:0009507(chloroplast);GO:0009536(plastid);GO:0009853(photorespiration);GO:0015977(carbon fixation);GO:0015979(photosynthesis);GO:0016491(oxidoreductase activity);GO:0016829(lyase activity);GO:0016984(ribulose-bisphosphate carboxylase activity);GO:0019253(reductive pentose-phosphate cycle);GO:0055114(oxidation-reduction process);GO:0055114(oxidation-reduction p…
HORVU5Hr1G050990	predicted protein	-2.68406	1	-3.26217	1	-5.8081	1	-1.63385	0.00112418	-4.99124	3.24034e-09	-4.41354	0.000198037	00630(Glyoxylate and dicarboxylate metabolism);00710(Carbon fixation in photosynthetic organisms);00710(Carbon fixation in photosynthetic organisms)	GO:0004497(monooxygenase activity);GO:0009507(chloroplast);GO:0009536(plastid);GO:0009853(photorespiration);GO:0015977(carbon fixation);GO:0015979(photosynthesis);GO:0016491(oxidoreductase activity);GO:0016829(lyase activity);GO:0016984(ribulose-bisphosphate carboxylase activity);GO:0055114(oxidation-reduction process);GO:0055114(oxidation-reduction process)
HORVU3Hr1G085270	predicted protein	-4.72737	1	-5.19797	1	-3.20581	1	-6.46021	4.30296e-11	-6.85692	9.03361e-10	-5.41921	2.50324e-05	00710(Carbon fixation in photosynthetic organisms);00710(Carbon fixation in photosynthetic organisms)	GO:0005975(carbohydrate metabolic process);GO:0005986(sucrose biosynthetic process);GO:0009507(chloroplast);GO:0009570(chloroplast stroma);GO:0009579(thylakoid);GO:0009941(chloroplast envelope);GO:0016051(carbohydrate biosynthetic process);GO:0016311(dephosphorylation);GO:0016791(phosphatase activity);GO:0019252(starch biosynthetic process);GO:0042578(phosphoric ester hydrolase activity);GO:00427…
HORVU4Hr1G053940	predicted protein	-1.16586	1	-3.09017	1	-9.92327	1	-2.81337	1.47584e-06	-5.45408	3.06495e-08	-3.95129	3.00085e-05	00730(Thiamine metabolism);00730(Thiamine metabolism)	NA
HORVU2Hr1G065120	predicted protein	0.368365	0.934449	4.76461	1.15663e-33	2.27719	0.000399961	2.00453	3.99222e-06	3.6533	6.30752e-08	3.37703	4.68951e-16	00750(Vitamin B6 metabolism);00750(Vitamin B6 metabolism)	GO:0003824(catalytic activity);GO:0042819(vitamin B6 biosynthetic process);GO:0042823(pyridoxal phosphate biosynthetic process);GO:0042823(pyridoxal phosphate biosynthetic process)
HORVU6Hr1G062820	predicted protein	-3.98541	1	-10.5205	1	-10.5205	1	-12.0648	5.88783e-15	-12.0648	3.2923e-12	-12.0648	1.2548e-10	00520(Amino sugar and nucleotide sugar metabolism);00520(Amino sugar and nucleotide sugar metabolism)	GO:0004553(hydrolase activity, hydrolyzing O-glycosyl compounds);GO:0005975(carbohydrate metabolic process);GO:0016787(hydrolase activity);GO:0016787(hydrolase activity)
HORVU7Hr1G056600	predicted protein	1.6927	0.0448782	2.72375	0.00101731	4.22114	9.44518e-12	3.61017	4.36318e-06	3.16685	0.000939536	5.29807	3.22822e-13	00790(Folate biosynthesis);00790(Folate biosynthesis)	GO:0003824(catalytic activity);GO:0003824(catalytic activity)
HORVU5Hr1G009220	predicted protein	3.88389	3.67734e-05	3.25958	1	1.44374	1	5.58029	1.12181e-07	5.49818	4.01277e-06	5.35979	1.40579e-07	00860(Porphyrin and chlorophyll metabolism);00860(Porphyrin and chlorophyll metabolism)	NA
HORVU5Hr1G109470	predicted protein	-1.1503	1	-4.20227	1	-4.3016	1	-3.16089	5.32308e-10	-6.8156	1.19102e-13	-5.46138	5.73877e-07	00860(Porphyrin and chlorophyll metabolism);00860(Porphyrin and chlorophyll metabolism)	GO:0010277(chlorophyllide a oxygenase [overall] activity);GO:0016020(membrane);GO:0016021(integral component of membrane);GO:0016491(oxidoreductase activity);GO:0051537(2 iron, 2 sulfur cluster binding);GO:0055114(oxidation-reduction process);GO:0055114(oxidation-reduction process)
HORVU1Hr1G091880	predicted protein	1.00458	0.132972	1.14063	0.076392	2.15397	5.177e-06	2.03353	1.24142e-05	2.42017	4.24972e-06	2.16937	4.23451e-05	00900(Terpenoid backbone biosynthesis);00900(Terpenoid backbone biosynthesis)	GO:0008299(isoprenoid biosynthetic process);GO:0015979(photosynthesis);GO:0016740(transferase activity);GO:0016765(transferase activity, transferring alkyl or aryl (other than methyl) groups);GO:0016765(transferase activity, transferring alkyl or aryl (other than methyl) groups)
HORVU1Hr1G002210	predicted protein	9.95753	1	11.124	1	0	1	13.5942	1.33324e-13	14.6495	5.29591e-15	14.4401	8.81566e-13	00901(Indole alkaloid biosynthesis);00901(Indole alkaloid biosynthesis)	GO:0016788(hydrolase activity, acting on ester bonds);GO:0016788(hydrolase activity, acting on ester bonds)
HORVU4Hr1G034710	predicted protein	2.1441	1	3.69385	0.0127812	4.82538	0.000247541	13.1199	4.33094e-11	14.349	4.96454e-06	15.5689	6.92086e-19	00901(Indole alkaloid biosynthesis);00901(Indole alkaloid biosynthesis)	NA
HORVU1Hr1G029460	predicted protein	0.935348	0.0657213	1.16731	0.0156342	1.65182	7.89455e-06	1.41297	0.000469272	1.71219	0.000775215	2.1162	1.02178e-08	00901(Indole alkaloid biosynthesis);00901(Indole alkaloid biosynthesis)	GO:0016788(hydrolase activity, acting on ester bonds);GO:0016788(hydrolase activity, acting on ester bonds)
HORVU3Hr1G058440	predicted protein	1.61986	0.0085347	1.61305	0.00828248	1.7832	0.000433223	1.7893	0.00266557	2.3924	3.95628e-05	2.93419	2.2443e-09	00901(Indole alkaloid biosynthesis);00901(Indole alkaloid biosynthesis)	GO:0016788(hydrolase activity, acting on ester bonds);GO:0016788(hydrolase activity, acting on ester bonds)
HORVU3Hr1G058610	predicted protein	-2.72802	1	-10.211	1	-10.211	1	-7.02172	1.59904e-11	-6.12777	1.79305e-07	-12.2118	2.41031e-09	00901(Indole alkaloid biosynthesis);00901(Indole alkaloid biosynthesis)	GO:0016788(hydrolase activity, acting on ester bonds);GO:0016788(hydrolase activity, acting on ester bonds)
HORVU6Hr1G088610	predicted protein	1.51622	0.03243	-2.89057	0.00271735	-2.779	0.00103123	-3.96824	2.56703e-12	-4.1725	2.5077e-09	-7.32306	9.59005e-11	00902(Monoterpenoid biosynthesis);00902(Monoterpenoid biosynthesis)	GO:0000287(magnesium ion binding);GO:0010333(terpene synthase activity);GO:0016829(lyase activity);GO:0046872(metal ion binding);GO:0046872(metal ion binding)
HORVU2Hr1G018430	predicted protein	4.39512	3.51899e-09	-1.12996	1	-1.62922	1	7.92539	1.97563e-44	6.31815	2.04609e-15	3.63179	5.84804e-06	00940(Phenylpropanoid biosynthesis);00940(Phenylpropanoid biosynthesis)	NA
HORVU2Hr1G094380	predicted protein	1.26386	0.00173564	0.96425	0.0278124	0.767011	0.0187221	1.48535	5.728e-05	2.29493	2.79329e-09	1.78491	9.50679e-07	00905(Brassinosteroid biosynthesis);00062(Fatty acid elongation);01040(Biosynthesis of unsaturated fatty acids);01040(Biosynthesis of unsaturated fatty acids)	GO:0003865(3-oxo-5-alpha-steroid 4-dehydrogenase activity);GO:0005737(cytoplasm);GO:0006488(dolichol-linked oligosaccharide biosynthetic process);GO:0006629(lipid metabolic process);GO:0016020(membrane);GO:0016021(integral component of membrane);GO:0016627(oxidoreductase activity, acting on the CH-CH group of donors);GO:0055114(oxidation-reduction process);GO:0055114(oxidation-reduction process)
HORVU5Hr1G055740	predicted protein	3.40956	0.00159279	1.41637	0.290797	0.67202	0.527174	3.87531	5.1973e-16	3.88527	1.70979e-09	2.51109	6.60794e-05	00906(Carotenoid biosynthesis);00906(Carotenoid biosynthesis)	GO:0016702(oxidoreductase activity, acting on single donors with incorporation of molecular oxygen, incorporation of two atoms of oxygen);GO:0046872(metal ion binding);GO:0055114(oxidation-reduction process);GO:0055114(oxidation-reduction process)
HORVU6Hr1G059100	predicted protein	0.766788	0.225873	2.29337	1.86707e-07	2.47825	1.05367e-09	1.78946	6.51005e-05	3.28097	5.00377e-14	3.84872	1.98303e-23	00906(Carotenoid biosynthesis);00906(Carotenoid biosynthesis)	NA
HORVU4Hr1G072300	predicted protein	-1.84952	7.35009e-07	-0.319197	0.30072	-0.358182	0.478855	-3.49561	2.51318e-25	-2.80166	1.72934e-10	-1.54852	0.00323421	00906(Carotenoid biosynthesis);00906(Carotenoid biosynthesis)	GO:0071949(FAD binding);GO:0071949(FAD binding)
HORVU7Hr1G120660	predicted protein	-3.28728	6.68866e-16	-2.77261	2.05427e-07	-0.244188	0.737248	-2.31738	6.25804e-22	-3.39408	3.5917e-18	-2.87494	1.10131e-08	00906(Carotenoid biosynthesis);00906(Carotenoid biosynthesis)	GO:0004310(farnesyl-diphosphate farnesyltransferase activity);GO:0006696(ergosterol biosynthetic process);GO:0009058(biosynthetic process);GO:0009507(chloroplast);GO:0010287(plastoglobule);GO:0016020(membrane);GO:0016021(integral component of membrane);GO:0016117(carotenoid biosynthetic process);GO:0016120(carotene biosynthetic process);GO:0016740(transferase activity);GO:0016765(transferase acti…
HORVU1Hr1G085930	predicted protein	-2.22572	8.4983e-05	-2.24417	0.00124447	-2.06248	0.0166719	-1.76742	1.5751e-07	-3.92607	6.60705e-12	-4.29037	3.49065e-16	00906(Carotenoid biosynthesis);00906(Carotenoid biosynthesis)	NA
HORVU7Hr1G020370	predicted protein	1.13221	1	1.90344	0.0383646	1.08162	1	3.35116	6.01486e-07	4.93467	2.17713e-13	5.54935	1.97398e-17	00910(Nitrogen metabolism);00910(Nitrogen metabolism)	GO:0004089(carbonate dehydratase activity);GO:0008270(zinc ion binding);GO:0008270(zinc ion binding)
HORVU4Hr1G055160	predicted protein	0.196328	0.757483	0.00396716	0.780015	-0.226443	0.69632	-1.10506	1.63255e-05	-1.69278	3.95279e-05	-2.29485	1.24325e-05	00520(Amino sugar and nucleotide sugar metabolism);00520(Amino sugar and nucleotide sugar metabolism)	GO:0005515(protein binding);GO:0005515(protein binding)
HORVU7Hr1G030380	predicted protein	1.67874	0.00184984	0.973446	0.13575	0.451928	0.345335	3.86196	3.54253e-12	2.91296	4.52074e-05	1.99143	0.00224145	00940(Phenylpropanoid biosynthesis);00940(Phenylpropanoid biosynthesis)	GO:0003824(catalytic activity);GO:0050662(coenzyme binding);GO:0050662(coenzyme binding)
HORVU4Hr1G016940	predicted protein	2.51562	1.14093e-07	1.05149	0.167054	0.0333445	0.95891	3.29696	9.0376e-08	4.79021	8.74704e-15	3.04755	0.000104808	00940(Phenylpropanoid biosynthesis);00940(Phenylpropanoid biosynthesis)	GO:0004601(peroxidase activity);GO:0005576(extracellular region);GO:0006979(response to oxidative stress);GO:0016020(membrane);GO:0016021(integral component of membrane);GO:0016491(oxidoreductase activity);GO:0020037(heme binding);GO:0042744(hydrogen peroxide catabolic process);GO:0046872(metal ion binding);GO:0055114(oxidation-reduction process);GO:0098869(cellular oxidant detoxification);GO:009…
HORVU5Hr1G073760	predicted protein	13.9786	2.07003e-12	12.7945	1	13.2851	1.01037e-10	4.66886	6.84426e-05	5.98067	4.06237e-07	7.57237	1.02677e-11	00940(Phenylpropanoid biosynthesis);00940(Phenylpropanoid biosynthesis)	GO:0003824(catalytic activity);GO:0050662(coenzyme binding);GO:0050662(coenzyme binding)
HORVU7Hr1G118090	predicted protein	1.6952	0.0668215	0.857664	0.405737	-0.353097	0.717059	2.81397	4.01472e-08	3.18632	3.04929e-07	1.87741	0.00110121	00940(Phenylpropanoid biosynthesis);00945(Stilbenoid, diarylheptanoid and gingerol biosynthesis);00941(Flavonoid biosynthesis);00941(Flavonoid biosynthesis)	GO:0016747(transferase activity, transferring acyl groups other than amino-acyl groups);GO:0016747(transferase activity, transferring acyl groups other than amino-acyl groups)
HORVU2Hr1G112120	predicted protein	0.811982	0.418203	4.0192	3.89061e-09	3.18725	2.49795e-07	3.20604	2.37808e-07	4.83747	1.06919e-10	5.63728	3.4137e-21	00940(Phenylpropanoid biosynthesis);00945(Stilbenoid, diarylheptanoid and gingerol biosynthesis);00941(Flavonoid biosynthesis);00941(Flavonoid biosynthesis)	GO:0016747(transferase activity, transferring acyl groups other than amino-acyl groups);GO:0016747(transferase activity, transferring acyl groups other than amino-acyl groups)
HORVU4Hr1G012680	predicted protein	-0.686381	0.00086011	-2.8262	8.77268e-11	-4.40016	1.62469e-20	-1.77617	3.41402e-15	-4.59597	8.87535e-23	-5.23168	2.27977e-21	00592(alpha-Linolenic acid metabolism);00360(Phenylalanine metabolism);00130(Ubiquinone and other terpenoid-quinone biosynthesis);00940(Phenylpropanoid biosynthesis);00940(Phenylpropanoid biosynthesis)	GO:0003824(catalytic activity);GO:0003824(catalytic activity)
HORVU7Hr1G093380	predicted protein	-0.661894	0.000215341	-1.44543	2.78482e-05	-2.21767	1.05287e-07	-1.02104	1.99746e-05	-1.37098	0.000209228	-5.2496	1.393e-23	00940(Phenylpropanoid biosynthesis)	GO:0003824(catalytic activity);GO:0050662(coenzyme binding)
HORVU1Hr1G016770	predicted protein	-2.34632	8.78911e-05	-2.78669	0.0066771	-1.86407	0.0296252	-2.25609	0.00147954	-2.65643	6.39524e-05	-2.83325	0.00216067	00940(Phenylpropanoid biosynthesis);00940(Phenylpropanoid biosynthesis)	GO:0004601(peroxidase activity);GO:0005576(extracellular region);GO:0006979(response to oxidative stress);GO:0016491(oxidoreductase activity);GO:0020037(heme binding);GO:0042744(hydrogen peroxide catabolic process);GO:0046872(metal ion binding);GO:0055114(oxidation-reduction process);GO:0098869(cellular oxidant detoxification);GO:0098869(cellular oxidant detoxification)
HORVU5Hr1G059300	predicted protein	0.531971	0.756294	-0.166464	0.790015	-4.75786	1	2.93719	3.42029e-05	4.39062	1.01565e-11	4.06045	5.54944e-08	00944(Flavone and flavonol biosynthesis)	GO:0016740(transferase activity);GO:0016757(transferase activity, transferring glycosyl groups);GO:0016758(transferase activity, transferring hexosyl groups)
HORVU7Hr1G035540	predicted protein	-4.9472	1	-11.4887	1	-4.59412	1	-3.70618	5.10621e-07	-7.21535	4.49386e-14	-5.5513	8.55602e-11	00944(Flavone and flavonol biosynthesis)	GO:0016740(transferase activity);GO:0016757(transferase activity, transferring glycosyl groups);GO:0016758(transferase activity, transferring hexosyl groups)
HORVU2Hr1G064100	predicted protein	1.62077	0.0102443	2.80575	2.28374e-05	1.29974	0.0149681	3.24262	1.33624e-09	3.36052	2.78904e-07	2.81813	7.55934e-05	00970(Aminoacyl-tRNA biosynthesis)	NA
HORVU5Hr1G104290	predicted protein	3.27934	0.00418756	3.85552	0.00227444	3.3364	0.000498455	3.46615	0.00221957	4.34747	5.91079e-05	4.41151	4.11549e-06	00970(Aminoacyl-tRNA biosynthesis);00970(Aminoacyl-tRNA biosynthesis)	NA
HORVU7Hr1G063020	predicted protein	0.943905	0.0333235	1.21459	0.0081639	0.952457	0.00408129	2.44726	4.05323e-16	1.66308	0.00200136	1.91813	1.82417e-08	02010(ABC transporters);02010(ABC transporters)	GO:0000166(nucleotide binding);GO:0005524(ATP binding);GO:0005886(plasma membrane);GO:0008361(regulation of cell size);GO:0009506(plasmodesma);GO:0009624(response to nematode);GO:0009637(response to blue light);GO:0009640(photomorphogenesis);GO:0009733(response to auxin);GO:0009926(auxin polar transport);GO:0009958(positive gravitropism);GO:0010328(auxin influx transmembrane transporter activity)…
HORVU5Hr1G092260	predicted protein	0.930114	0.0280261	2.2632	3.4605e-09	1.55925	0.014994	1.41709	3.44934e-05	2.73245	1.40909e-15	2.62563	2.94078e-13	03008(Ribosome biogenesis in eukaryotes);03008(Ribosome biogenesis in eukaryotes)	GO:0003924(GTPase activity);GO:0005525(GTP binding);GO:0005525(GTP binding)
HORVU7Hr1G080560	predicted protein	0.924702	0.00776948	1.8745	2.70055e-07	1.18306	9.59025e-05	1.19495	0.000256554	2.44583	1.23092e-11	1.29249	1.21237e-05	03008(Ribosome biogenesis in eukaryotes);03008(Ribosome biogenesis in eukaryotes)	GO:0006364(rRNA processing);GO:0032040(small-subunit processome);GO:0032040(small-subunit processome)
HORVU1Hr1G091230	predicted protein	2.5863	2.28128e-18	2.10441	3.24199e-08	0.105687	0.594865	2.82939	2.78597e-21	3.15231	2.10886e-14	2.82298	9.21911e-16	03010(Ribosome);00280(Valine, leucine and isoleucine degradation);00280(Valine, leucine and isoleucine degradation)	GO:0004672(protein kinase activity);GO:0005524(ATP binding);GO:0006468(protein phosphorylation);GO:0006468(protein phosphorylation)
HORVU4Hr1G061900	predicted protein	2.6885	1.20917e-05	1.76122	0.00927753	3.52178	0.000618819	2.9684	8.90414e-27	4.99109	1.46201e-36	5.55686	2.29209e-40	03010(Ribosome);03010(Ribosome)	GO:0003735(structural constituent of ribosome);GO:0005515(protein binding);GO:0005840(ribosome);GO:0006412(translation);GO:0006412(translation)
HORVU3Hr1G090000	predicted protein	-2.52575	1.38579e-05	-1.67438	0.009533	-2.43843	0.00050494	1.43228	0.00124014	1.7038	0.000543017	1.82487	2.42209e-05	03010(Ribosome);03010(Ribosome)	GO:0003676(nucleic acid binding);GO:0003712(transcription coregulator activity);GO:0004402(histone acetyltransferase activity);GO:0004523(RNA-DNA hybrid ribonuclease activity);GO:0005515(protein binding);GO:0005516(calmodulin binding);GO:0005634(nucleus);GO:0006355(regulation of transcription, DNA-templated);GO:0008270(zinc ion binding);GO:0009409(response to cold);GO:0009553(embryo sac developme…
HORVU5Hr1G115340	predicted protein	-0.915588	0.000416061	-1.90998	2.69899e-05	-3.4525	4.42386e-11	-1.26722	3.54711e-06	-2.67186	4.14536e-10	-3.6477	2.90415e-11	03010(Ribosome);03010(Ribosome)	GO:0003735(structural constituent of ribosome);GO:0005622(intracellular);GO:0005730(nucleolus);GO:0005737(cytoplasm);GO:0005840(ribosome);GO:0006412(translation);GO:0009507(chloroplast);GO:0009570(chloroplast stroma);GO:0009941(chloroplast envelope);GO:0009941(chloroplast envelope)
HORVU5Hr1G078830	predicted protein	-0.308078	0.178878	-0.997613	0.0618349	-1.44428	0.0179296	-1.3948	3.3114e-05	-1.54372	0.00107498	-2.77988	0.000104519	03010(Ribosome);03010(Ribosome)	GO:0006457(protein folding);GO:0015031(protein transport);GO:0015031(protein transport)
HORVU5Hr1G098340	predicted protein	-0.42159	0.0952898	-1.23266	0.0199756	-2.03002	0.000585014	-1.02447	0.00102195	-1.94622	0.000104698	-3.22012	8.23256e-07	03010(Ribosome);03010(Ribosome)	GO:0003735(structural constituent of ribosome);GO:0005840(ribosome);GO:0006412(translation);GO:0006412(translation)
HORVU7Hr1G084420	predicted protein	-0.181108	0.160908	-0.843017	0.0306442	1.50335	0.000265686	-2.94569	9.86746e-19	-1.90671	2.14487e-06	-1.78198	0.00014711	03013(RNA transport);03008(Ribosome biogenesis in eukaryotes);03008(Ribosome biogenesis in eukaryotes)	GO:0000166(nucleotide binding);GO:0003924(GTPase activity);GO:0005525(GTP binding);GO:0005622(intracellular);GO:0005623(cell);GO:0005634(nucleus);GO:0006913(nucleocytoplasmic transport);GO:0015031(protein transport);GO:0015031(protein transport)
HORVU6Hr1G021630	predicted protein	1.16039	0.00537743	1.56574	0.000669878	2.2178	5.46975e-08	1.17323	0.000462893	1.59356	0.00205974	2.38795	2.9736e-12	03013(RNA transport);03013(RNA transport)	GO:0003743(translation initiation factor activity);GO:0005515(protein binding);GO:0006413(translational initiation);GO:0006413(translational initiation)
HORVU4Hr1G017430	predicted protein	-2.95434	1.19576e-15	-0.484698	0.196417	-0.210972	0.766841	-1.73474	1.46799e-11	-1.74402	3.19993e-07	-1.52347	0.000475503	03013(RNA transport);03015(mRNA surveillance pathway);03018(RNA degradation);03018(RNA degradation)	GO:0003677(DNA binding);GO:0005634(nucleus);GO:0006355(regulation of transcription, DNA-templated);GO:0045893(positive regulation of transcription, DNA-templated);GO:1901002(positive regulation of response to salt stress);GO:1901002(positive regulation of response to salt stress)
HORVU3Hr1G105930	predicted protein	-4.77339	8.85028e-09	-2.40361	0.00216086	-1.74902	0.0272725	-4.46917	1.80166e-08	-3.66474	3.26094e-08	-5.75738	6.93228e-06	03015(mRNA surveillance pathway);03015(mRNA surveillance pathway)	GO:0003676(nucleic acid binding);GO:0003723(RNA binding);GO:0003729(mRNA binding);GO:0007281(germ cell development);GO:0007281(germ cell development)
HORVU2Hr1G123480	predicted protein	0.683468	0.682659	4.72762	5.38515e-09	5.524	2.79238e-13	3.29572	1.60037e-12	4.57203	1.19536e-10	4.647	2.51855e-24	03018(RNA degradation)	GO:0003676(nucleic acid binding);GO:0004535(poly(A)-specific ribonuclease activity);GO:0030014(CCR4-NOT complex);GO:0090503(RNA phosphodiester bond hydrolysis, exonucleolytic)
HORVU7Hr1G116880	predicted protein	0.74952	0.257946	4.78263	3.98154e-12	5.97278	5.57415e-30	1.62058	0.000226068	4.52755	6.00653e-22	6.26904	4.11584e-29	03040(Spliceosome);03013(RNA transport);03015(mRNA surveillance pathway);03015(mRNA surveillance pathway)	NA
HORVU1Hr1G075040	predicted protein	1.42145	0.106251	1.74192	0.0340998	1.45661	0.0729666	3.37957	1.27948e-10	3.83308	1.3519e-08	3.34777	1.59425e-08	03040(Spliceosome);03040(Spliceosome)	GO:0003677(DNA binding);GO:0003700(DNA-binding transcription factor activity);GO:0005634(nucleus);GO:0006351(transcription, DNA-templated);GO:0006355(regulation of transcription, DNA-templated);GO:0006355(regulation of transcription, DNA-templated)
HORVU6Hr1G078060	predicted protein	0.614079	0.576377	2.75936	2.7595e-07	4.56056	1.33974e-24	2.13511	2.43232e-05	4.06827	4.31074e-17	4.98046	1.76064e-29	03040(Spliceosome);03040(Spliceosome)	GO:0003676(nucleic acid binding);GO:0003723(RNA binding);GO:0003723(RNA binding)
HORVU3Hr1G006270	predicted protein	-11.0126	1	-2.93126	1	-11.0126	1	-2.8831	8.47253e-09	-5.07188	6.66417e-12	-4.59533	7.77515e-06	03040(Spliceosome);03040(Spliceosome)	NA
HORVU3Hr1G006150	predicted protein	-2.75737	1	-2.32438	1	-4.12452	1	-2.00129	0.000144435	-3.5227	0.000448531	-5.08985	2.20318e-06	03040(Spliceosome);03040(Spliceosome)	NA
HORVU2Hr1G096510	predicted protein	1.80811	0.00232373	2.15266	0.000604054	1.23888	0.0868617	3.76416	2.20236e-08	5.24119	5.73679e-14	4.69702	8.59564e-09	03050(Proteasome);03050(Proteasome)	GO:0016491(oxidoreductase activity);GO:0055114(oxidation-reduction process);GO:0055114(oxidation-reduction process)
HORVU6Hr1G022500	predicted protein	-2.84374	1	-3.84885	1	-4.37745	1	-3.74959	1.99754e-08	-3.314	0.00134191	-6.49085	4.25255e-08	03050(Proteasome);03050(Proteasome)	NA
HORVU6Hr1G018280	predicted protein	0.682683	0.503686	2.07797	0.00155233	2.79161	2.82235e-08	2.00897	0.000827033	2.78549	7.9819e-06	2.82332	3.05365e-07	03060(Protein export);03060(Protein export)	GO:0003924(GTPase activity);GO:0005047(signal recognition particle binding);GO:0005525(GTP binding);GO:0005622(intracellular);GO:0005623(cell);GO:0005783(endoplasmic reticulum);GO:0005785(signal recognition particle receptor complex);GO:0006614(SRP-dependent cotranslational protein targeting to membrane);GO:0006886(intracellular protein transport);GO:0006886(intracellular protein transport)
HORVU7Hr1G018620	predicted protein	-0.0379049	0.593667	1.81928	0.0532864	2.77335	0.000328534	3.51925	2.30895e-08	3.41367	2.33363e-06	5.05619	5.70301e-13	04016(MAPK signaling pathway - plant)	NA
HORVU7Hr1G018600	predicted protein	0.0174732	0.648386	1.91119	0.047881	2.95295	0.000156369	3.27658	1.55608e-07	3.18383	1.55709e-05	4.78029	9.07567e-13	04016(MAPK signaling pathway - plant);04016(MAPK signaling pathway - plant)	GO:0003993(acid phosphatase activity);GO:0016311(dephosphorylation);GO:0016311(dephosphorylation)
HORVU6Hr1G033380	predicted protein	0.882895	0.0212557	1.95401	2.75239e-06	1.79736	5.80737e-08	1.17075	0.000328264	1.78958	2.52652e-07	2.77444	3.84682e-15	04016(MAPK signaling pathway - plant);04016(MAPK signaling pathway - plant)	GO:0000166(nucleotide binding);GO:0005507(copper ion binding);GO:0005524(ATP binding);GO:0006812(cation transport);GO:0016020(membrane);GO:0016021(integral component of membrane);GO:0019829(cation-transporting ATPase activity);GO:0030001(metal ion transport);GO:0046872(metal ion binding);GO:0099132(ATP hydrolysis coupled cation transmembrane transport);GO:0099132(ATP hydrolysis coupled cation tra…
HORVU2Hr1G096350	predicted protein	0.607204	0.216959	0.949164	0.0131907	1.27699	3.87086e-05	1.09281	0.000940076	1.42318	7.11394e-05	1.4604	1.7485e-06	04016(MAPK signaling pathway - plant);04016(MAPK signaling pathway - plant)	GO:0004672(protein kinase activity);GO:0005524(ATP binding);GO:0006468(protein phosphorylation);GO:0006468(protein phosphorylation)
HORVU5Hr1G066260	predicted protein	1.47517	0.103558	4.4509	3.80379e-10	4.01769	6.83665e-10	3.19407	3.08081e-09	4.36598	4.42763e-11	4.93721	9.70049e-25	04016(MAPK signaling pathway - plant);04070(Phosphatidylinositol signaling system);04626(Plant-pathogen interaction);04626(Plant-pathogen interaction)	GO:0005509(calcium ion binding);GO:0016020(membrane);GO:0016021(integral component of membrane);GO:0016021(integral component of membrane)
HORVU6Hr1G023290	predicted protein	1.43224	0.0678738	4.02965	2.26911e-09	4.63454	1.00747e-11	2.24157	0.0016323	3.17685	3.31214e-05	2.68978	0.000203967	04016(MAPK signaling pathway - plant);04626(Plant-pathogen interaction);04075(Plant hormone signal transduction);04075(Plant hormone signal transduction)	GO:0000166(nucleotide binding);GO:0004672(protein kinase activity);GO:0004674(protein serine/threonine kinase activity);GO:0005515(protein binding);GO:0005524(ATP binding);GO:0006468(protein phosphorylation);GO:0016020(membrane);GO:0016021(integral component of membrane);GO:0016301(kinase activity);GO:0016310(phosphorylation);GO:0016740(transferase activity);GO:0016740(transferase activity)
HORVU1Hr1G070250	predicted protein	2.1104	0.00344147	8.06868	4.94983e-24	9.34712	1.74282e-33	4.74755	1.22374e-22	7.39773	2.71532e-26	7.90497	8.76237e-32	04016(MAPK signaling pathway - plant);04626(Plant-pathogen interaction);04626(Plant-pathogen interaction)	GO:0003677(DNA binding);GO:0003700(DNA-binding transcription factor activity);GO:0005634(nucleus);GO:0006355(regulation of transcription, DNA-templated);GO:0043565(sequence-specific DNA binding);GO:0043565(sequence-specific DNA binding)
HORVU5Hr1G098820	predicted protein	0.325688	0.993277	1.05618	0.0235276	0.827505	0.036992	1.73927	2.76898e-07	2.16597	3.6237e-08	1.84923	5.8034e-08	04075(Plant hormone signal transduction);04626(Plant-pathogen interaction);04626(Plant-pathogen interaction)	GO:0004672(protein kinase activity);GO:0005515(protein binding);GO:0005524(ATP binding);GO:0006468(protein phosphorylation);GO:0016020(membrane);GO:0016021(integral component of membrane);GO:0016021(integral component of membrane)
HORVU5Hr1G078630	predicted protein	0.471742	0.844916	2.74159	6.91615e-05	3.50581	1.049e-07	4.3614	2.68252e-17	5.84983	1.54941e-16	7.07424	3.03443e-28	04016(MAPK signaling pathway - plant);04626(Plant-pathogen interaction);04626(Plant-pathogen interaction)	GO:0004601(peroxidase activity);GO:0005509(calcium ion binding);GO:0016020(membrane);GO:0016021(integral component of membrane);GO:0016491(oxidoreductase activity);GO:0050664(oxidoreductase activity, acting on NAD(P)H, oxygen as acceptor);GO:0055114(oxidation-reduction process);GO:0098869(cellular oxidant detoxification);GO:0098869(cellular oxidant detoxification)
HORVU0Hr1G013380	predicted protein	0.319851	1	6.39863	9.27272e-06	5.42195	0.00632566	12.7197	2.33769e-06	14.1575	1.11576e-06	15.819	2.19541e-08	04016(MAPK signaling pathway - plant);04626(Plant-pathogen interaction);04626(Plant-pathogen interaction)	GO:0004601(peroxidase activity);GO:0005509(calcium ion binding);GO:0016020(membrane);GO:0016021(integral component of membrane);GO:0016174(NAD(P)H oxidase activity);GO:0016491(oxidoreductase activity);GO:0050664(oxidoreductase activity, acting on NAD(P)H, oxygen as acceptor);GO:0055114(oxidation-reduction process);GO:0098869(cellular oxidant detoxification);GO:0098869(cellular oxidant detoxificat…
HORVU2Hr1G034680	predicted protein	2.09581	0.0333261	-0.00511361	0.89039	-0.173574	0.86786	3.2039	2.95652e-07	2.61441	0.00159977	3.23313	1.31139e-05	04075(Plant hormone signal transduction)	NA
HORVU3Hr1G084750	predicted protein	2.45734	3.79817e-14	0.701985	0.145277	0.68707	0.0403092	3.46037	1.27266e-31	2.15893	7.02121e-05	1.74631	3.63749e-06	04075(Plant hormone signal transduction);04075(Plant hormone signal transduction)	GO:0016020(membrane);GO:0016021(integral component of membrane);GO:0016021(integral component of membrane)
HORVU5Hr1G093580	predicted protein	2.91917	1.25732e-16	1.62008	0.00060878	-0.521358	0.456201	3.80084	8.80419e-29	3.87584	1.50285e-13	3.55318	3.92442e-20	04075(Plant hormone signal transduction);04075(Plant hormone signal transduction)	GO:0005515(protein binding);GO:0005634(nucleus);GO:0006351(transcription, DNA-templated);GO:0006355(regulation of transcription, DNA-templated);GO:0009734(auxin-activated signaling pathway);GO:0009734(auxin-activated signaling pathway)
HORVU2Hr1G034670	predicted protein	1.36867	0.00210616	1.18926	0.0126425	1.80198	1.28522e-05	3.28364	4.85865e-26	1.75234	0.000261677	2.34388	1.66182e-08	04075(Plant hormone signal transduction);04075(Plant hormone signal transduction)	NA
HORVU6Hr1G088140	predicted protein	3.16123	2.85749e-06	2.01495	0.00813869	2.61683	0.000126889	4.34376	4.23385e-17	2.91298	6.28081e-06	2.9576	4.47858e-06	04075(Plant hormone signal transduction);04075(Plant hormone signal transduction)	GO:0005515(protein binding);GO:0005634(nucleus);GO:0006351(transcription, DNA-templated);GO:0006355(regulation of transcription, DNA-templated);GO:0009734(auxin-activated signaling pathway);GO:0009734(auxin-activated signaling pathway)
HORVU2Hr1G031310	predicted protein	1.22714	0.00603292	2.07923	2.16453e-05	2.77492	8.76172e-11	2.22878	8.19695e-13	3.43353	8.44368e-20	3.72219	2.09308e-20	04075(Plant hormone signal transduction);04075(Plant hormone signal transduction)	NA
HORVU2Hr1G120830	predicted protein	0.232034	0.762516	0.132732	0.964329	0.317718	0.33059	2.0871	1.27327e-11	1.52775	0.000987704	1.21818	0.0017161	04075(Plant hormone signal transduction);04075(Plant hormone signal transduction)	GO:0004672(protein kinase activity);GO:0005515(protein binding);GO:0005524(ATP binding);GO:0006468(protein phosphorylation);GO:0016020(membrane);GO:0016021(integral component of membrane);GO:0016021(integral component of membrane)
HORVU4Hr1G002570	predicted protein	9.1323	1	13.8364	7.95479e-09	14.4983	2.01447e-13	13.5535	1.02946e-10	15.4862	2.19653e-14	15.3519	5.02603e-15	04075(Plant hormone signal transduction);04075(Plant hormone signal transduction)	GO:0009733(response to auxin);GO:0009733(response to auxin)
HORVU4Hr1G081600	predicted protein	0.662471	0.282464	1.52988	0.00108448	1.63086	6.61903e-05	1.26365	0.000319133	2.09983	1.92661e-08	1.66401	1.01684e-06	04075(Plant hormone signal transduction);04075(Plant hormone signal transduction)	GO:0004672(protein kinase activity);GO:0005515(protein binding);GO:0005524(ATP binding);GO:0006468(protein phosphorylation);GO:0006468(protein phosphorylation)
HORVU5Hr1G045020	predicted protein	0.793712	0.103842	0.518643	0.284876	-0.106829	0.910936	1.56342	0.00217261	1.69351	1.11141e-05	1.48623	4.31458e-06	04075(Plant hormone signal transduction);04075(Plant hormone signal transduction)	NA
HORVU2Hr1G035120	predicted protein	-3.90644	1	-1.78734	1	-5.52316	1	-3.39158	5.27015e-05	-5.1855	6.55394e-06	-11.718	1.68866e-08	04075(Plant hormone signal transduction)	NA
HORVU3Hr1G072340	predicted protein	-0.296663	0.0492617	-1.57257	1.39402e-05	-2.17744	3.96184e-06	-1.58211	5.3125e-10	-2.38476	9.11899e-10	-4.3678	1.5059e-22	04075(Plant hormone signal transduction);04075(Plant hormone signal transduction)	GO:0003677(DNA binding);GO:0005634(nucleus);GO:0006351(transcription, DNA-templated);GO:0006355(regulation of transcription, DNA-templated);GO:0009725(response to hormone);GO:0009734(auxin-activated signaling pathway);GO:0009734(auxin-activated signaling pathway)
HORVU2Hr1G062680	predicted protein	0.275629	0.913983	-0.0533869	0.661992	0.158357	0.643437	-1.12079	2.38227e-06	-1.78426	4.01699e-05	-2.13698	7.12733e-05	04075(Plant hormone signal transduction);04075(Plant hormone signal transduction)	NA
HORVU5Hr1G073410	predicted protein	-0.830496	0.0236649	-1.6456	0.0238151	-2.40602	0.00454646	-1.48182	0.000994147	-1.76572	0.00309467	-3.52187	0.000189325	04075(Plant hormone signal transduction);04075(Plant hormone signal transduction)	GO:0003700(DNA-binding transcription factor activity);GO:0006351(transcription, DNA-templated);GO:0006355(regulation of transcription, DNA-templated);GO:0043565(sequence-specific DNA binding);GO:0043565(sequence-specific DNA binding)
HORVU7Hr1G040790	predicted protein	-1.86182	0.0601732	4.45467	0.000258198	5.22505	4.50496e-05	2.95783	9.83533e-05	4.60229	2.34056e-06	6.71049	2.72959e-08	04120(Ubiquitin mediated proteolysis);04120(Ubiquitin mediated proteolysis)	GO:0004842(ubiquitin-protein transferase activity);GO:0016567(protein ubiquitination);GO:0016567(protein ubiquitination)
HORVU5Hr1G125420	predicted protein	-0.637293	0.00106175	-0.950528	0.00352091	-2.56811	3.68417e-12	-1.226	1.56253e-09	-1.74065	3.8487e-09	-2.7541	7.93275e-10	04120(Ubiquitin mediated proteolysis);04120(Ubiquitin mediated proteolysis)	GO:0000166(nucleotide binding);GO:0005524(ATP binding);GO:0016740(transferase activity);GO:0016740(transferase activity)
HORVU7Hr1G010290	predicted protein	-0.671662	0.021315	-1.55312	0.00317058	-2.54465	2.11135e-05	-1.10618	0.000109409	-2.48554	1.88378e-06	-5.48006	8.52183e-15	04120(Ubiquitin mediated proteolysis);04120(Ubiquitin mediated proteolysis)	NA
HORVU5Hr1G065280	predicted protein	0.771285	0.411653	1.59509	0.0197501	1.3318	0.0114489	4.34538	2.16678e-09	4.10314	4.70014e-07	2.85099	0.00114249	04141(Protein processing in endoplasmic reticulum);04141(Protein processing in endoplasmic reticulum)	GO:0004842(ubiquitin-protein transferase activity);GO:0005524(ATP binding);GO:0016567(protein ubiquitination);GO:0016740(transferase activity);GO:0046872(metal ion binding);GO:0046872(metal ion binding)
HORVU7Hr1G026030	predicted protein	0.752785	0.0898668	0.165098	0.912584	0.581959	0.0449724	1.67438	1.56952e-08	2.28113	5.02319e-09	1.42307	4.42405e-05	04141(Protein processing in endoplasmic reticulum);04141(Protein processing in endoplasmic reticulum)	GO:0005623(cell);GO:0045454(cell redox homeostasis);GO:0045454(cell redox homeostasis)
HORVU3Hr1G093310	predicted protein	0.382433	0.81162	1.09138	0.00578702	2.78772	6.00115e-15	1.23222	0.000214621	2.21038	1.51833e-07	2.97177	4.63029e-14	04141(Protein processing in endoplasmic reticulum);04141(Protein processing in endoplasmic reticulum)	GO:0006355(regulation of transcription, DNA-templated);GO:0046983(protein dimerization activity);GO:0046983(protein dimerization activity)
HORVU6Hr1G068980	predicted protein	-0.673345	0.169159	-0.769057	0.270712	0.458832	0.413078	-3.82161	3.59276e-23	-5.58171	2.95078e-22	-2.19003	0.00012518	04141(Protein processing in endoplasmic reticulum);04141(Protein processing in endoplasmic reticulum)	GO:0006355(regulation of transcription, DNA-templated);GO:0046983(protein dimerization activity);GO:0046983(protein dimerization activity)
HORVU6Hr1G067360	predicted protein	0.656376	0.331897	2.03827	8.35696e-05	3.03043	1.5563e-12	2.13211	2.00455e-09	3.4795	4.32577e-20	4.22261	2.47193e-21	04144(Endocytosis);04144(Endocytosis)	GO:0016020(membrane);GO:0016021(integral component of membrane);GO:0016021(integral component of membrane)
HORVU6Hr1G088090	predicted protein	2.07192	0.0021629	2.05511	0.00771216	1.71414	0.00544108	4.03922	3.09149e-06	4.40126	3.35212e-06	4.823	3.69382e-08	04145(Phagosome);04145(Phagosome)	GO:0008234(cysteine-type peptidase activity);GO:0008234(cysteine-type peptidase activity)
HORVU4Hr1G060990	predicted protein	1.11069	0.0178258	0.920774	0.038429	1.40188	1.69519e-05	1.44221	2.31058e-05	1.47143	0.000374661	1.15021	0.000560822	04146(Peroxisome);04146(Peroxisome)	GO:0005774(vacuolar membrane);GO:0005777(peroxisome);GO:0016020(membrane);GO:0016021(integral component of membrane);GO:0043132(NAD transport);GO:0044375(regulation of peroxisome size);GO:0044375(regulation of peroxisome size)
HORVU5Hr1G016400	predicted protein	0.933006	0.0478172	0.964033	0.01664	0.284847	0.381929	1.16073	0.000995215	2.22665	2.54261e-09	1.81729	1.72642e-09	04146(Peroxisome);04146(Peroxisome)	GO:0016020(membrane);GO:0016021(integral component of membrane);GO:0016021(integral component of membrane)
HORVU3Hr1G033740	predicted protein	-0.207318	0.184957	3.58702	5.04437e-08	4.72797	2.51571e-19	2.24276	2.5656e-10	3.59254	7.00167e-09	4.7773	7.08123e-23	04626(Plant-pathogen interaction);00970(Aminoacyl-tRNA biosynthesis);00970(Aminoacyl-tRNA biosynthesis)	GO:0003677(DNA binding);GO:0003700(DNA-binding transcription factor activity);GO:0005634(nucleus);GO:0006355(regulation of transcription, DNA-templated);GO:0043565(sequence-specific DNA binding);GO:0043565(sequence-specific DNA binding)
HORVU2Hr1G096270	predicted protein	4.04193	7.74125e-20	1.69414	0.0138409	0.448736	0.368066	5.59317	2.87894e-41	3.92212	7.39789e-07	2.54789	0.000156079	04626(Plant-pathogen interaction);04626(Plant-pathogen interaction)	GO:0000166(nucleotide binding);GO:0004672(protein kinase activity);GO:0004674(protein serine/threonine kinase activity);GO:0005509(calcium ion binding);GO:0005524(ATP binding);GO:0006468(protein phosphorylation);GO:0050832(defense response to fungus);GO:1901002(positive regulation of response to salt stress);GO:1901002(positive regulation of response to salt stress)
HORVU7Hr1G000700	predicted protein	0.683122	1	-5.45821	1	-5.45821	1	3.90517	3.32692e-22	4.00427	8.14539e-16	2.98179	8.34453e-12	04626(Plant-pathogen interaction);04626(Plant-pathogen interaction)	GO:0043531(ADP binding);GO:0043531(ADP binding)
HORVU2Hr1G107970	predicted protein	1.41051	0.0378464	2.4647	0.000936274	1.93339	0.00200866	3.13946	8.77683e-11	3.70002	1.21519e-10	2.4318	5.5626e-05	04626(Plant-pathogen interaction);04626(Plant-pathogen interaction)	GO:0043531(ADP binding);GO:0043531(ADP binding)
HORVU1Hr1G089890	predicted protein	0.337244	0.943837	0.366608	0.6674	1.31648	0.00391469	2.60831	2.36585e-10	2.50464	4.15223e-07	1.52226	0.00271302	04626(Plant-pathogen interaction);04626(Plant-pathogen interaction)	GO:0043531(ADP binding);GO:0043531(ADP binding)
HORVU3Hr1G106950	predicted protein	1.17349	0.135732	3.11452	3.05194e-05	2.12012	0.000176575	2.3579	2.39281e-10	2.92946	3.27251e-06	4.26579	1.79862e-13	04626(Plant-pathogen interaction);04626(Plant-pathogen interaction)	GO:0005509(calcium ion binding);GO:0005509(calcium ion binding)
HORVU5Hr1G057670	predicted protein	-0.413315	0.0137608	1.68616	0.00139335	2.90552	7.70714e-12	1.88585	2.40415e-09	2.54278	7.81299e-13	2.95519	1.06998e-13	04626(Plant-pathogen interaction);04626(Plant-pathogen interaction)	GO:0043531(ADP binding);GO:0043531(ADP binding)
HORVU3Hr1G011710	predicted protein	1.56365	0.0319683	4.42082	1.54117e-08	4.02459	5.39616e-08	3.38825	6.42843e-09	4.25476	1.26825e-12	4.71773	2.9251e-14	04626(Plant-pathogen interaction);04626(Plant-pathogen interaction)	GO:0000166(nucleotide binding);GO:0004672(protein kinase activity);GO:0004674(protein serine/threonine kinase activity);GO:0005515(protein binding);GO:0005524(ATP binding);GO:0006468(protein phosphorylation);GO:0016020(membrane);GO:0016021(integral component of membrane);GO:0016301(kinase activity);GO:0016310(phosphorylation);GO:0016740(transferase activity);GO:0016740(transferase activity)
HORVU1Hr1G029850	predicted protein	-0.515721	0.0236453	0.356274	0.612153	1.50021	0.000404296	2.24038	1.87422e-08	2.49561	5.95525e-05	2.54147	4.24982e-09	04626(Plant-pathogen interaction);04626(Plant-pathogen interaction)	GO:0005509(calcium ion binding);GO:0005509(calcium ion binding)
HORVU6Hr1G066470	predicted protein	1.20097	0.000770884	0.880363	0.0320072	1.24524	6.18606e-05	1.58845	5.43968e-07	1.84893	2.10765e-06	1.47249	2.13217e-06	04626(Plant-pathogen interaction);04626(Plant-pathogen interaction)	GO:0000166(nucleotide binding);GO:0004672(protein kinase activity);GO:0004674(protein serine/threonine kinase activity);GO:0005509(calcium ion binding);GO:0005524(ATP binding);GO:0006468(protein phosphorylation);GO:0006468(protein phosphorylation)
HORVU3Hr1G035810	predicted protein	1.39817	0.00535007	2.37863	7.06039e-07	1.87068	5.62357e-05	1.92617	3.35505e-06	2.91644	1.85131e-10	2.85619	2.4877e-11	04626(Plant-pathogen interaction);04626(Plant-pathogen interaction)	GO:0000166(nucleotide binding);GO:0004672(protein kinase activity);GO:0004674(protein serine/threonine kinase activity);GO:0005524(ATP binding);GO:0006468(protein phosphorylation);GO:0006468(protein phosphorylation)
HORVU5Hr1G043460	predicted protein	1.90283	0.000930218	1.32374	0.0446216	1.83398	0.000168049	2.39729	5.85694e-06	2.21285	0.00182591	2.63502	3.41952e-06	04626(Plant-pathogen interaction);04626(Plant-pathogen interaction)	GO:0005509(calcium ion binding);GO:0005509(calcium ion binding)
HORVU5Hr1G072020	predicted protein	1.29788	0.00179121	1.20168	0.00553	2.12967	1.77221e-10	1.8259	7.23432e-06	2.05417	8.93686e-06	2.63396	1.25129e-11	04626(Plant-pathogen interaction);04626(Plant-pathogen interaction)	GO:0003677(DNA binding);GO:0003700(DNA-binding transcription factor activity);GO:0005634(nucleus);GO:0006355(regulation of transcription, DNA-templated);GO:0043565(sequence-specific DNA binding);GO:0043565(sequence-specific DNA binding)
HORVU0Hr1G018690	predicted protein	1.30452	0.0522188	1.22729	0.0906965	-0.124658	0.899825	-1.88859	5.14725e-08	-2.93593	2.80602e-07	-3.56903	3.6604e-06	04626(Plant-pathogen interaction)	NA
HORVU3Hr1G079040	predicted protein	-2.49345	0.000110141	-3.55303	0.00397271	-3.56998	0.000694762	-5.30182	1.57269e-23	-15.9839	8.61474e-40	-10.1358	2.46054e-31	04626(Plant-pathogen interaction);04626(Plant-pathogen interaction)	GO:0000166(nucleotide binding);GO:0004672(protein kinase activity);GO:0004674(protein serine/threonine kinase activity);GO:0005509(calcium ion binding);GO:0005524(ATP binding);GO:0006468(protein phosphorylation);GO:0016020(membrane);GO:0016021(integral component of membrane);GO:0016021(integral component of membrane)
HORVU7Hr1G000630	predicted protein	-0.426666	1	-0.246708	1	-0.127202	1	-1.0249	4.42275e-07	-2.4153	6.21373e-07	-3.19727	1.54759e-06	04626(Plant-pathogen interaction);04626(Plant-pathogen interaction)	GO:0043531(ADP binding);GO:0043531(ADP binding)
HORVU0Hr1G018710	predicted protein	1.73378	0.0182627	1.64838	0.0432309	0.224537	0.813145	-1.95097	5.08638e-05	-2.33685	7.90291e-05	-3.55613	4.25773e-05	04626(Plant-pathogen interaction);04626(Plant-pathogen interaction)	GO:0043531(ADP binding);GO:0043531(ADP binding)
HORVU4Hr1G019380	predicted protein	-2.48328	1	-2.80877	1	-3.2278	1	-3.19749	6.86605e-07	-3.77704	3.70674e-06	-12.3562	1.31394e-10	04712(Circadian rhythm - plant)	GO:0003677(DNA binding);GO:0003700(DNA-binding transcription factor activity);GO:0005634(nucleus);GO:0006351(transcription, DNA-templated);GO:0006355(regulation of transcription, DNA-templated)
HORVU4Hr1G039300	predicted protein	0.308356	0.986401	0.71546	0.0814913	0.375208	0.177584	2.53136	1.1447e-07	3.42375	2.35521e-12	3.55322	9.16221e-17	04712(Circadian rhythm - plant);04712(Circadian rhythm - plant)	NA
HORVU7Hr1G070870	predicted protein	0.80189	0.0670417	0.913318	0.0292053	1.06693	0.000571699	-1.82265	1.42316e-15	-2.49423	9.55082e-16	-2.97653	1.34579e-12	04712(Circadian rhythm - plant);04712(Circadian rhythm - plant)	GO:0003677(DNA binding);GO:0005634(nucleus);GO:0005634(nucleus)
HORVU0Hr1G031850	predicted protein	-0.209472	0.276582	-0.156269	0.663973	-0.558909	0.367115	-1.16267	2.0061e-05	-2.28603	1.71553e-06	-4.71469	0.000739787	04712(Circadian rhythm - plant);04712(Circadian rhythm - plant)	GO:0003677(DNA binding);GO:0005634(nucleus);GO:0005634(nucleus)
HORVU2Hr1G017240	predicted protein	-1.85137	0.000215596	-1.61877	0.0168045	-1.81577	0.00579761	-2.16677	3.89451e-06	-2.95555	1.26164e-06	-3.13431	1.5642e-05	04933(AGE-RAGE signaling pathway in diabetic complications);04933(AGE-RAGE signaling pathway in diabetic complications)	GO:0003677(DNA binding);GO:0005634(nucleus);GO:0005634(nucleus)
HORVU3Hr1G091680	predicted protein	3.11663	7.05408e-24	1.656	0.000121566	0.347822	0.305724	5.411	1.27331e-63	5.20191	3.00379e-19	5.46147	6.58947e-34	NA	GO:0004190(aspartic-type endopeptidase activity);GO:0006508(proteolysis)
HORVU6Hr1G089570	predicted protein	2.86041	9.46043e-23	0.839075	0.0497776	-0.427853	0.42715	4.35103	2.20158e-39	3.06964	1.1243e-07	2.33884	5.98054e-10	NA	GO:0005576(extracellular region);GO:0030145(manganese ion binding);GO:0045735(nutrient reservoir activity);GO:0046872(metal ion binding);GO:0046872(metal ion binding)
HORVU3Hr1G099550	predicted protein	2.57952	1.69212e-12	2.99284	3.58264e-14	0.927243	0.0259422	4.20311	4.02649e-38	4.99831	1.93079e-13	4.34644	4.50564e-30	NA	GO:0004190(aspartic-type endopeptidase activity);GO:0006508(proteolysis)
HORVU5Hr1G013590	predicted protein	6.92414	2.99717e-36	5.13871	3.72237e-09	1.99917	1	7.47417	1.04636e-33	7.28554	8.72887e-19	6.17405	1.26962e-14	NA	NA
HORVU7Hr1G036050	predicted protein	0.787062	0.179948	0.396033	0.529068	0.0568073	0.737729	4.31345	3.13176e-32	3.66603	1.69602e-09	3.93515	1.65265e-19	NA	GO:0016020(membrane);GO:0016021(integral component of membrane)
HORVU5Hr1G013600	predicted protein	6.91232	9.92184e-32	5.15269	1.26831e-08	2.02893	1	7.71743	5.60239e-31	7.54286	2.04521e-17	6.38827	1.62261e-13	NA	NA
HORVU0Hr1G000850	predicted protein	6.55849	1	5.60645	1	4.47055	1	3.87652	7.02895e-29	2.30451	1.65228e-07	3.93947	6.14981e-08	NA	GO:0004867(serine-type endopeptidase inhibitor activity);GO:0005576(extracellular region);GO:0010951(negative regulation of endopeptidase activity)
HORVU5Hr1G000940	predicted protein	10.4958	1	13.2675	8.62306e-11	13.5172	1.1207e-12	14.5219	9.94781e-29	16.6009	7.24251e-36	16.4724	7.05476e-37	NA	GO:0004672(protein kinase activity);GO:0005524(ATP binding);GO:0006468(protein phosphorylation);GO:0016020(membrane);GO:0016021(integral component of membrane);GO:0030246(carbohydrate binding);GO:0030246(carbohydrate binding)
HORVU7Hr1G098280	predicted protein	-0.808734	0.000383556	-1.8394	4.08132e-06	-1.94175	2.56605e-07	3.79586	1.74627e-26	2.56191	5.59618e-06	1.85133	4.03748e-05	NA	GO:0004553(hydrolase activity, hydrolyzing O-glycosyl compounds);GO:0005576(extracellular region);GO:0005618(cell wall);GO:0005975(carbohydrate metabolic process);GO:0006073(cellular glucan metabolic process);GO:0008152(metabolic process);GO:0010411(xyloglucan metabolic process);GO:0016740(transferase activity);GO:0016762(xyloglucan:xyloglucosyl transferase activity);GO:0016787(hydrolase activity…
HORVU3Hr1G095700	predicted protein	7.41019	1.20326e-10	7.87597	4.20947e-05	3.44374	0.00608353	8.45453	1.47255e-23	7.8275	2.17386e-29	3.78785	6.72464e-08	NA	NA
HORVU4Hr1G071360	predicted protein	2.15683	0.0154757	4.85259	9.35147e-09	5.65056	2.80735e-12	5.38621	2.73958e-23	7.43671	3.06356e-18	9.02795	4.01969e-53	NA	GO:0016020(membrane);GO:0016021(integral component of membrane);GO:0055114(oxidation-reduction process);GO:0055114(oxidation-reduction process)
HORVU1Hr1G017570	predicted protein	1.87016	9.15801e-10	1.75616	1.7256e-06	0.996605	0.00159917	2.85271	1.08236e-22	3.42688	1.0944e-22	2.96735	1.56306e-17	NA	GO:0004190(aspartic-type endopeptidase activity);GO:0006508(proteolysis);GO:0006629(lipid metabolic process);GO:0008233(peptidase activity);GO:0016020(membrane);GO:0016021(integral component of membrane);GO:0016787(hydrolase activity);GO:0016787(hydrolase activity)
HORVU7Hr1G037180	predicted protein	2.20891	0.00167789	2.37746	0.000213584	1.03276	0.0674252	4.29329	1.4863e-22	3.64878	1.42011e-08	3.1528	8.08656e-08	NA	GO:0003677(DNA binding);GO:0003700(DNA-binding transcription factor activity);GO:0005634(nucleus);GO:0006351(transcription, DNA-templated);GO:0006355(regulation of transcription, DNA-templated);GO:0006355(regulation of transcription, DNA-templated)
HORVU4Hr1G073580	predicted protein	3.94011	7.05558e-17	2.29106	0.000264925	0.300108	0.70199	4.0004	4.7283e-22	2.9722	9.51498e-07	1.64946	0.00157556	NA	NA
HORVU1Hr1G039810	predicted protein	1.18415	0.0437944	0.760108	0.27916	-1.003	0.113359	5.59952	9.10299e-22	4.73654	1.33458e-07	4.97928	2.98482e-12	NA	NA
HORVU4Hr1G020710	predicted protein	11.6058	9.19566e-13	10.4472	1	5.94248	1	12.9973	2.00532e-21	11.7509	1.71749e-12	11.6779	6.39051e-09	NA	GO:0003677(DNA binding);GO:0005634(nucleus);GO:0006355(regulation of transcription, DNA-templated);GO:0006355(regulation of transcription, DNA-templated)
HORVU4Hr1G048330	predicted protein	0.561081	0.456678	-1.70871	0.00753258	-6.69408	1.13576e-16	2.9338	1.47576e-19	-2.06888	5.02531e-05	-4.35998	1.666e-06	NA	NA
HORVU3Hr1G081570	predicted protein	-0.191698	0.131092	-0.303002	0.332125	0.701276	0.0453333	4.02507	5.74859e-17	2.93172	7.2117e-05	3.34495	5.01359e-12	NA	GO:0016020(membrane);GO:0016021(integral component of membrane);GO:0016021(integral component of membrane)
HORVU5Hr1G021480	predicted protein	0.519598	0.551417	-1.72489	0.0106591	-6.63887	2.24601e-15	2.88028	8.9599e-17	-2.24476	5.10547e-05	-4.28265	4.49634e-06	NA	NA
HORVU3Hr1G103960	predicted protein	13.4428	1.05192e-13	12.9649	1.64337e-10	11.0791	1	13.2489	1.16324e-16	13.6179	5.20954e-13	12.4818	5.81245e-10	NA	GO:0003824(catalytic activity);GO:0003824(catalytic activity)
HORVU1Hr1G010210	predicted protein	12.3544	3.48675e-10	10.7264	1	12.7086	1.07324e-10	13.622	1.24876e-15	14.4509	4.34418e-16	15.5854	1.13111e-15	NA	GO:0005886(plasma membrane);GO:0008643(carbohydrate transport);GO:0016020(membrane);GO:0016021(integral component of membrane);GO:0016021(integral component of membrane)
HORVU1Hr1G090250	predicted protein	-2.29612	0.00217721	1.55743	0.107505	1.26736	0.147386	5.75741	1.5962e-15	4.06797	0.000198146	4.51984	1.97234e-07	NA	GO:0003677(DNA binding);GO:0003700(DNA-binding transcription factor activity);GO:0005634(nucleus);GO:0006351(transcription, DNA-templated);GO:0006355(regulation of transcription, DNA-templated);GO:0010200(response to chitin);GO:0010200(response to chitin)
HORVU2Hr1G111290	predicted protein	4.65264	8.19332e-09	4.77151	7.04017e-06	2.07171	1	5.65309	2.04131e-15	4.46386	1.07887e-06	3.78724	0.000118935	NA	NA
HORVU3Hr1G026560	predicted protein	1.3296	0.0500757	0.657909	0.457339	-1.84641	0.0533493	3.51021	2.74198e-15	2.69108	6.38038e-05	2.19111	9.21525e-06	NA	GO:0016020(membrane);GO:0016021(integral component of membrane);GO:0016021(integral component of membrane)
HORVU2Hr1G044650	predicted protein	1.47092	0.00115482	1.54236	0.00451498	0.037742	0.883824	3.17257	4.01249e-14	3.4039	4.29228e-12	3.14893	1.65898e-10	NA	GO:0004672(protein kinase activity);GO:0005524(ATP binding);GO:0006468(protein phosphorylation);GO:0016020(membrane);GO:0016021(integral component of membrane);GO:0016021(integral component of membrane)
HORVU7Hr1G088430	predicted protein	0.880807	0.116697	1.62585	0.000336273	1.43668	0.00171674	2.1321	9.61995e-14	1.89343	3.02197e-05	1.52415	5.5869e-07	NA	NA
HORVU2Hr1G105890	predicted protein	2.71819	4.43004e-14	1.79328	5.27557e-05	0.662152	0.0859059	3.02572	1.1096e-13	2.64443	3.4098e-08	1.21116	0.00306133	NA	GO:0016020(membrane);GO:0016021(integral component of membrane);GO:0016021(integral component of membrane)
HORVU6Hr1G058630	predicted protein	2.44636	0.00513071	7.22072	2.21825e-18	8.18104	5.12911e-31	3.70357	1.47777e-13	6.76423	4.542e-16	6.03864	1.68133e-23	NA	GO:0003677(DNA binding);GO:0005634(nucleus);GO:0005634(nucleus)
HORVU1Hr1G086450	predicted protein	3.40355	0.00227527	2.96958	0.00884111	2.89543	0.00599278	5.68275	5.11348e-13	6.2077	3.16071e-13	5.02316	6.24962e-07	NA	NA
HORVU2Hr1G091360	predicted protein	1.19537	0.0081309	2.48236	1.5319e-07	3.00249	2.54346e-09	2.59764	5.85827e-13	3.31577	3.09563e-08	3.51958	2.50501e-16	NA	GO:0004672(protein kinase activity);GO:0005524(ATP binding);GO:0006468(protein phosphorylation);GO:0016020(membrane);GO:0016021(integral component of membrane);GO:0030246(carbohydrate binding);GO:0030246(carbohydrate binding)
HORVU4Hr1G075410	predicted protein	2.0875	1.96805e-09	0.117749	0.972055	-1.09326	0.0272308	2.79836	8.65349e-13	2.69118	1.43434e-06	3.2469	3.60367e-13	NA	NA
HORVU3Hr1G016800	predicted protein	2.36616	1	2.79824	1	4.11759	0.00127939	12.9895	1.20317e-12	12.8019	1.51206e-10	13.0126	1.29649e-08	NA	GO:0004553(hydrolase activity, hydrolyzing O-glycosyl compounds);GO:0005576(extracellular region);GO:0005618(cell wall);GO:0005975(carbohydrate metabolic process);GO:0006073(cellular glucan metabolic process);GO:0008152(metabolic process);GO:0010411(xyloglucan metabolic process);GO:0016740(transferase activity);GO:0016762(xyloglucan:xyloglucosyl transferase activity);GO:0016787(hydrolase activity…
HORVU5Hr1G121570	predicted protein	0.19908	0.738571	1.31473	0.0149991	2.12378	1.04577e-05	2.42329	1.45246e-12	2.61484	2.22151e-11	3.08555	5.91845e-19	NA	GO:0016020(membrane);GO:0016021(integral component of membrane);GO:0016021(integral component of membrane)
HORVU7Hr1G108460	predicted protein	3.33787	1	1.833	1	3.14319	1	5.18084	2.56677e-12	3.65557	4.57146e-05	2.56095	0.00145103	NA	GO:0005515(protein binding)
HORVU6Hr1G022590	predicted protein	5.35848	1	8.4857	1.12223e-12	8.7616	2.21566e-15	7.14428	4.14442e-12	7.76533	6.79966e-11	9.7277	2.04508e-23	NA	GO:0016020(membrane);GO:0016021(integral component of membrane);GO:0016021(integral component of membrane)
HORVU1Hr1G008300	predicted protein	0.225287	0.821869	3.36321	3.78258e-06	1.15467	0.07528	4.08844	4.53658e-12	6.07427	8.15938e-25	4.91372	1.36246e-17	NA	GO:0000977(RNA polymerase II regulatory region sequence-specific DNA binding);GO:0003677(DNA binding);GO:0003700(DNA-binding transcription factor activity);GO:0005634(nucleus);GO:0006351(transcription, DNA-templated);GO:0006355(regulation of transcription, DNA-templated);GO:0045944(positive regulation of transcription by RNA polymerase II);GO:0046983(protein dimerization activity);GO:0046983(prot…
HORVU7Hr1G105620	predicted protein	0.816159	0.123116	0.395567	0.475512	0.809433	0.0166575	2.19584	4.91207e-12	2.04702	0.00010925	1.9063	1.00536e-07	NA	GO:0005507(copper ion binding);GO:0016491(oxidoreductase activity);GO:0055114(oxidation-reduction process);GO:0055114(oxidation-reduction process)
HORVU0Hr1G040370	predicted protein	1.08124	1	1.74931	0.0783949	0.747406	1	4.9997	6.83502e-12	4.49293	5.15592e-08	3.18969	7.2622e-05	NA	GO:0000166(nucleotide binding);GO:0004672(protein kinase activity);GO:0004674(protein serine/threonine kinase activity);GO:0005524(ATP binding);GO:0006468(protein phosphorylation);GO:0016020(membrane);GO:0016021(integral component of membrane);GO:0016021(integral component of membrane)
HORVU2Hr1G031410	predicted protein	3.07533	2.54731e-07	1.7703	0.0205018	2.44909	4.92993e-05	3.86805	7.64721e-12	2.58002	0.00112955	2.59654	0.000549751	NA	GO:0016020(membrane);GO:0016021(integral component of membrane);GO:0016021(integral component of membrane)
HORVU1Hr1G047570	predicted protein	0.793103	0.505341	1.20554	0.145526	2.42125	0.0001864	4.11471	1.09377e-11	2.52737	0.00231404	4.75208	6.60164e-15	NA	GO:0098869(cellular oxidant detoxification);GO:0098869(cellular oxidant detoxification)
HORVU6Hr1G046160	predicted protein	-0.643365	1	-0.493747	1	-2.60864	1	11.3253	1.42117e-11	11.1412	1.11762e-08	11.6119	1.13807e-08	NA	GO:0000166(nucleotide binding);GO:0004672(protein kinase activity);GO:0004674(protein serine/threonine kinase activity);GO:0005524(ATP binding);GO:0006468(protein phosphorylation);GO:0006468(protein phosphorylation)
HORVU0Hr1G014460	predicted protein	1.25371	0.213247	0.896437	0.0608007	-0.98285	0.0207918	2.27464	1.69405e-11	2.53697	7.20508e-11	1.33157	0.000113175	NA	GO:0003950(NAD+ ADP-ribosyltransferase activity);GO:0003950(NAD+ ADP-ribosyltransferase activity)
HORVU5Hr1G042740	predicted protein	0.786602	0.163967	1.46814	0.00489591	2.77543	7.01788e-09	2.07187	1.76348e-11	2.09377	1.54641e-06	2.4559	1.56693e-10	NA	GO:0005515(protein binding);GO:0016740(transferase activity);GO:0016757(transferase activity, transferring glycosyl groups);GO:0016758(transferase activity, transferring hexosyl groups);GO:0048188(Set1C/COMPASS complex);GO:0051568(histone H3-K4 methylation);GO:0051568(histone H3-K4 methylation)
HORVU2Hr1G117400	predicted protein	4.63994	1	8.62158	1.67522e-10	8.15688	3.38979e-11	13.7009	1.98148e-11	15.5433	2.06443e-14	13.5061	9.94037e-08	NA	NA
HORVU2Hr1G092460	predicted protein	1.23114	0.17552	3.32236	3.74807e-07	4.027	5.03091e-14	3.64964	2.42105e-11	4.10462	4.43147e-10	5.15948	1.79536e-20	NA	GO:0005622(intracellular);GO:0008270(zinc ion binding);GO:0008270(zinc ion binding)
HORVU2Hr1G118230	predicted protein	1.13098	0.128651	4.45081	1.31664e-14	4.81279	7.14266e-21	2.50984	3.06722e-11	4.90487	3.09265e-14	4.6349	5.98173e-24	NA	GO:0030001(metal ion transport);GO:0046872(metal ion binding);GO:0046872(metal ion binding)
HORVU4Hr1G008070	predicted protein	13.0379	1	16.8607	3.96007e-21	16.4436	3.47127e-23	13.4851	3.43072e-11	16.1889	4.83987e-19	15.2056	1.96275e-14	NA	NA
HORVU7Hr1G118020	predicted protein	1.99624	0.0230624	5.54538	5.76946e-11	6.35584	1.25003e-18	3.86601	3.74897e-11	6.06173	1.50853e-11	6.69945	1.12929e-26	NA	GO:0004190(aspartic-type endopeptidase activity);GO:0006508(proteolysis);GO:0008233(peptidase activity);GO:0016787(hydrolase activity);GO:0016787(hydrolase activity)
HORVU4Hr1G089560	predicted protein	0.576075	0.411329	1.11741	0.0130866	0.764502	0.0265622	3.65084	4.2809e-11	4.09316	1.26093e-10	4.88665	3.13323e-22	NA	NA
HORVU5Hr1G001920	predicted protein	1.40122	0.0695013	1.96808	0.0297402	2.68541	1.51248e-08	4.98875	5.29077e-11	5.10317	3.99389e-10	4.87863	7.94453e-15	NA	GO:0000166(nucleotide binding);GO:0004672(protein kinase activity);GO:0004674(protein serine/threonine kinase activity);GO:0005515(protein binding);GO:0005524(ATP binding);GO:0006468(protein phosphorylation);GO:0016020(membrane);GO:0016021(integral component of membrane);GO:0016301(kinase activity);GO:0016310(phosphorylation);GO:0016740(transferase activity);GO:0016740(transferase activity)
HORVU7Hr1G034230	predicted protein	13.6921	8.08144e-18	12.0668	1	5.4398	1	12.5174	5.74958e-11	13.3043	4.33519e-11	12.4364	6.60607e-08	NA	GO:0004864(protein phosphatase inhibitor activity);GO:0006952(defense response);GO:0009607(response to biotic stimulus);GO:0009738(abscisic acid-activated signaling pathway);GO:0010427(abscisic acid binding);GO:0032515(negative regulation of phosphoprotein phosphatase activity);GO:0038023(signaling receptor activity);GO:0038023(signaling receptor activity)
HORVU7Hr1G042490	predicted protein	2.35309	9.45375e-05	1.74817	0.00924562	0.673397	0.250645	2.82137	6.33289e-11	1.71913	0.00334481	2.33372	1.85296e-05	NA	GO:0004190(aspartic-type endopeptidase activity);GO:0006508(proteolysis);GO:0008233(peptidase activity);GO:0016787(hydrolase activity);GO:0016787(hydrolase activity)
HORVU5Hr1G118510	predicted protein	1.56688	0.0461403	0.533479	0.566661	-0.946437	1	3.78005	7.32335e-11	2.78936	4.28035e-05	2.66621	2.41596e-05	NA	GO:0048544(recognition of pollen);GO:0048544(recognition of pollen)
HORVU3Hr1G108690	predicted protein	4.05487	4.58175e-06	3.35085	0.000980439	1.81859	1	6.23461	8.12848e-11	5.55807	1.49613e-07	5.53179	2.22927e-08	NA	NA
HORVU5Hr1G088060	predicted protein	3.64644	1	3.68908	1	0.456767	1	5.93728	9.14445e-11	4.46285	2.01599e-05	4.86294	8.84916e-06	NA	GO:0004497(monooxygenase activity);GO:0005506(iron ion binding);GO:0008146(sulfotransferase activity);GO:0016020(membrane);GO:0016021(integral component of membrane);GO:0016491(oxidoreductase activity);GO:0016705(oxidoreductase activity, acting on paired donors, with incorporation or reduction of molecular oxygen);GO:0016740(transferase activity);GO:0020037(heme binding);GO:0046872(metal ion bind…
HORVU1Hr1G063390	predicted protein	2.018	0.00429185	5.94506	2.83272e-14	4.17078	0.000400856	2.75049	9.55481e-11	6.15149	2.03374e-32	6.68794	2.27362e-31	NA	GO:0000166(nucleotide binding);GO:0005524(ATP binding);GO:0016020(membrane);GO:0016021(integral component of membrane);GO:0016021(integral component of membrane)
HORVU4Hr1G014900	predicted protein	6.71311	4.89892e-15	6.44342	1.64731e-09	4.00728	1	4.86841	9.73736e-11	4.06926	6.46951e-06	3.99291	3.91106e-06	NA	GO:0016020(membrane);GO:0016021(integral component of membrane);GO:0046622(positive regulation of organ growth);GO:0046622(positive regulation of organ growth)
HORVU7Hr1G078320	predicted protein	6.71506	6.38526e-08	6.60214	1.92476e-16	2.79784	1	7.98252	1.22386e-10	7.57659	4.30316e-10	6.87254	3.39525e-10	NA	GO:0016020(membrane);GO:0016021(integral component of membrane);GO:0016021(integral component of membrane)
HORVU5Hr1G064020	predicted protein	2.0852	0.00552648	5.58796	9.88121e-12	6.47249	1.04087e-17	3.25572	1.30706e-10	6.57617	2.6765e-23	7.67787	2.443e-35	NA	GO:0016020(membrane);GO:0016021(integral component of membrane);GO:0016021(integral component of membrane)
HORVU6Hr1G035610	predicted protein	0.925563	0.0393116	0.842316	0.0528494	1.07018	0.00278515	1.99985	1.49302e-10	1.82597	3.99804e-06	1.50859	8.78338e-06	NA	GO:0004061(arylformamidase activity);GO:0016020(membrane);GO:0016021(integral component of membrane);GO:0019441(tryptophan catabolic process to kynurenine);GO:0019441(tryptophan catabolic process to kynurenine)
HORVU5Hr1G124010	predicted protein	1.57603	6.1614e-08	0.82072	0.0543707	-1.00537	0.00338334	1.97846	1.63016e-10	2.17775	2.25598e-10	1.20479	5.9261e-05	NA	GO:0003950(NAD+ ADP-ribosyltransferase activity);GO:0003950(NAD+ ADP-ribosyltransferase activity)
HORVU4Hr1G075550	predicted protein	8.77222	1	14.2919	1.99697e-16	15.3478	2.99027e-18	6.52851	2.2703e-10	8.16892	1.89367e-08	8.59809	2.39506e-12	NA	NA
HORVU5Hr1G068070	predicted protein	1.34479	0.014002	2.36281	3.95117e-05	3.40708	2.39902e-11	2.63901	2.42904e-10	2.69787	9.73605e-06	3.76542	6.2214e-14	NA	GO:0000166(nucleotide binding);GO:0004672(protein kinase activity);GO:0004674(protein serine/threonine kinase activity);GO:0005524(ATP binding);GO:0006468(protein phosphorylation);GO:0016020(membrane);GO:0016021(integral component of membrane);GO:0016301(kinase activity);GO:0016310(phosphorylation);GO:0016740(transferase activity);GO:0016740(transferase activity)
HORVU1Hr1G064770	predicted protein	-0.0335691	0.628577	0.311268	0.829866	-0.951638	0.250032	2.66851	2.55188e-10	2.75631	1.30267e-08	2.86405	1.6227e-10	NA	GO:0043531(ADP binding);GO:0043531(ADP binding)
HORVU1Hr1G086050	predicted protein	1.88898	0.0215462	2.1499	0.0130902	2.46136	0.000276851	3.4836	2.66965e-10	5.53515	6.34701e-25	4.71817	3.07253e-18	NA	GO:0005515(protein binding);GO:0043531(ADP binding);GO:0043531(ADP binding)
HORVU2Hr1G042300	predicted protein	10.8241	1	13.0886	3.77609e-09	11.6512	2.89093e-12	10.9011	3.04155e-10	12.6408	6.63129e-13	12.2343	1.60077e-10	NA	GO:0016020(membrane);GO:0016021(integral component of membrane);GO:0016740(transferase activity);GO:0016757(transferase activity, transferring glycosyl groups);GO:0016760(cellulose synthase (UDP-forming) activity);GO:0030244(cellulose biosynthetic process);GO:0071555(cell wall organization);GO:0071555(cell wall organization)
HORVU5Hr1G019820	predicted protein	0.951564	0.101607	1.91652	4.8523e-05	2.1933	2.49217e-05	3.21846	3.31839e-10	3.69324	9.90306e-10	2.93712	7.04313e-06	NA	NA
HORVU1Hr1G064780	predicted protein	0.521081	0.498388	1.41288	0.00174118	2.0815	9.84242e-07	1.9838	4.47222e-10	2.5183	4.65852e-12	2.53197	4.7083e-12	NA	GO:0004672(protein kinase activity);GO:0005515(protein binding);GO:0005524(ATP binding);GO:0006468(protein phosphorylation);GO:0016020(membrane);GO:0016021(integral component of membrane);GO:0016021(integral component of membrane)
HORVU3Hr1G116350	predicted protein	1.99343	0.00897812	1.2938	0.0624985	1.168	0.0287891	3.33559	4.99207e-10	2.99948	1.49823e-05	2.69714	0.000130985	NA	GO:0005515(protein binding);GO:0005515(protein binding)
HORVU5Hr1G023430	predicted protein	2.57944	0.0277741	2.22813	0.0594813	2.59145	0.0160103	2.8703	8.74736e-10	3.16714	2.77538e-08	2.0276	8.75186e-05	NA	GO:0005516(calmodulin binding)
HORVU4Hr1G075150	predicted protein	0.974364	0.0361301	0.817142	0.0787162	0.418465	0.21209	1.86391	1.01159e-09	1.4113	0.000228599	1.60569	4.86388e-07	NA	GO:0000166(nucleotide binding);GO:0004672(protein kinase activity);GO:0004674(protein serine/threonine kinase activity);GO:0005524(ATP binding);GO:0006468(protein phosphorylation);GO:0006468(protein phosphorylation)
HORVU4Hr1G089910	predicted protein	1.00971	0.0675911	1.60357	0.00109607	2.79095	5.31141e-11	2.47067	1.16855e-09	2.1939	0.000378483	3.06581	1.71273e-10	NA	NA
HORVU6Hr1G071520	predicted protein	-0.302395	0.133723	0.225318	0.862868	0.549825	0.215783	2.76896	1.54657e-09	2.36296	4.21318e-05	1.87379	0.000698982	NA	GO:0004190(aspartic-type endopeptidase activity);GO:0006508(proteolysis);GO:0008233(peptidase activity);GO:0016787(hydrolase activity);GO:0016787(hydrolase activity)
HORVU0Hr1G013120	predicted protein	3.06139	1	5.15213	4.46157e-05	4.11108	1	6.75978	1.65045e-09	6.31598	1.84711e-07	6.33822	4.70918e-08	NA	NA
HORVU7Hr1G057280	predicted protein	2.2354	0.00982598	2.3293	0.00857645	2.83757	0.00018826	3.52854	1.76767e-09	3.08094	2.36759e-05	2.93931	3.07877e-06	NA	GO:0004497(monooxygenase activity);GO:0005506(iron ion binding);GO:0016020(membrane);GO:0016021(integral component of membrane);GO:0016491(oxidoreductase activity);GO:0016705(oxidoreductase activity, acting on paired donors, with incorporation or reduction of molecular oxygen);GO:0020037(heme binding);GO:0046872(metal ion binding);GO:0055114(oxidation-reduction process);GO:0055114(oxidation-reduc…
HORVU5Hr1G122510	predicted protein	4.69028	4.73711e-06	6.17995	5.24638e-09	2.80239	0.00696678	3.6131	1.81368e-09	4.80424	7.01108e-08	3.29227	4.06677e-07	NA	GO:0004672(protein kinase activity);GO:0005515(protein binding);GO:0005524(ATP binding);GO:0006468(protein phosphorylation);GO:0016020(membrane);GO:0016021(integral component of membrane);GO:0016021(integral component of membrane)
HORVU1Hr1G026520	predicted protein	-0.176882	0.235144	1.33089	0.00911846	0.674391	0.14659	2.35874	2.05718e-09	3.14411	3.10494e-11	2.56248	1.76713e-10	NA	GO:0016747(transferase activity, transferring acyl groups other than amino-acyl groups);GO:0016747(transferase activity, transferring acyl groups other than amino-acyl groups)
HORVU5Hr1G118460	predicted protein	0.225211	0.778005	2.31065	0.000129236	2.47136	3.73031e-07	2.17113	3.3289e-09	2.94318	2.39443e-05	3.80206	3.30423e-15	NA	GO:0000166(nucleotide binding);GO:0004672(protein kinase activity);GO:0004674(protein serine/threonine kinase activity);GO:0005524(ATP binding);GO:0005886(plasma membrane);GO:0006468(protein phosphorylation);GO:0016020(membrane);GO:0016021(integral component of membrane);GO:0016301(kinase activity);GO:0016310(phosphorylation);GO:0016740(transferase activity);GO:0048544(recognition of pollen)
HORVU1Hr1G020140	predicted protein	1.76766	0.00667582	1.28524	0.0951503	1.77788	0.00432931	3.21729	4.3193e-09	2.45304	0.000425455	4.21548	2.79247e-15	NA	GO:0016020(membrane);GO:0016021(integral component of membrane);GO:0016787(hydrolase activity);GO:0016787(hydrolase activity)
HORVU2Hr1G071450	predicted protein	2.48557	0.000304793	2.47628	0.00124161	1.21643	0.0671676	3.38151	6.71698e-09	2.94813	1.28855e-05	2.71421	1.32116e-05	NA	GO:0016787(hydrolase activity);GO:0016787(hydrolase activity)
HORVU5Hr1G045780	predicted protein	-3.57126	0.000904827	0.717704	0.565877	2.36419	0.0266175	3.40012	8.19373e-09	3.34241	6.88599e-06	3.92575	6.11854e-08	NA	GO:0003676(nucleic acid binding)
HORVU2Hr1G118120	predicted protein	-0.0606476	1	5.74914	3.01573e-15	6.21213	1.86322e-24	3.31169	8.55485e-09	4.53453	2.47773e-10	4.32405	5.58668e-14	NA	GO:0016020(membrane);GO:0016021(integral component of membrane);GO:0016021(integral component of membrane)
HORVU0Hr1G002390	predicted protein	-2.30229	1	5.60125	2.68003e-10	6.53464	3.24913e-16	3.99202	1.111e-08	6.30614	3.04575e-12	6.85081	4.94951e-25	NA	NA
HORVU7Hr1G053230	predicted protein	0.338802	0.935594	0.398165	0.457481	0.734556	0.0189847	1.95175	1.16099e-08	1.87816	8.31466e-06	1.4251	2.57384e-05	NA	NA
HORVU4Hr1G069380	predicted protein	1.45544	0.106364	2.95096	0.000309267	4.36134	2.96547e-10	4.46049	1.41984e-08	4.93728	7.42881e-06	6.05556	1.28193e-14	NA	GO:0003824(catalytic activity);GO:0004721(phosphoprotein phosphatase activity);GO:0004722(protein serine/threonine phosphatase activity);GO:0006470(protein dephosphorylation);GO:0016787(hydrolase activity);GO:0043169(cation binding);GO:0043169(cation binding)
HORVU5Hr1G112300	predicted protein	0.778644	0.0714201	0.526538	0.249911	2.21547	8.56698e-11	1.5875	1.78228e-08	1.80107	2.4746e-07	1.90322	4.76721e-07	NA	NA
HORVU1Hr1G068520	predicted protein	0.409288	0.895364	0.451478	0.625808	1.15353	0.0236321	2.50791	1.81362e-08	2.39734	2.45243e-05	1.6453	0.000521756	NA	GO:0003677(DNA binding);GO:0005634(nucleus);GO:0005634(nucleus)
HORVU1Hr1G054210	predicted protein	3.64358	4.68731e-09	2.24232	0.0058981	4.15402	1.46177e-13	4.63711	2.12281e-08	5.45685	2.58183e-13	6.51629	2.81785e-21	NA	GO:0005576(extracellular region);GO:0019953(sexual reproduction);GO:0019953(sexual reproduction)
HORVU2Hr1G079170	predicted protein	1.72213	0.0135767	3.50504	3.21325e-07	3.26967	2.01213e-08	2.72787	2.55286e-08	3.1275	2.18425e-05	3.51775	7.47488e-12	NA	NA
HORVU2Hr1G117550	predicted protein	-0.0496516	1	6.74926	1.21744e-08	5.67791	1.57503e-06	5.82863	5.4256e-08	7.7949	6.81639e-12	6.05926	3.36804e-05	NA	NA
HORVU7Hr1G051430	predicted protein	1.2843	0.0105769	2.42797	4.62897e-06	2.02432	6.7255e-07	2.16226	6.2966e-08	2.68585	0.000100633	3.77529	1.57109e-13	NA	GO:0004672(protein kinase activity);GO:0005524(ATP binding);GO:0006468(protein phosphorylation);GO:0016020(membrane);GO:0016021(integral component of membrane);GO:0030246(carbohydrate binding);GO:0030246(carbohydrate binding)
HORVU1Hr1G065630	predicted protein	4.64299	1.87946e-20	1.851	0.0095124	1.67287	0.00586872	5.11358	6.56506e-08	3.65725	0.000977408	4.89566	0.00336045	NA	GO:0004867(serine-type endopeptidase inhibitor activity);GO:0005576(extracellular region);GO:0010951(negative regulation of endopeptidase activity)
HORVU3Hr1G017090	predicted protein	1.27389	1	5.70028	3.38841e-10	6.72502	9.26935e-15	4.05549	8.05664e-08	6.66567	3.50051e-19	7.76019	4.4296e-33	NA	GO:0005515(protein binding);GO:0016020(membrane);GO:0016021(integral component of membrane);GO:0016021(integral component of membrane)
HORVU1Hr1G001660	predicted protein	1.98778	0.00701135	2.35057	0.000496975	1.85477	0.00411731	3.06094	8.39944e-08	3.01692	4.74958e-06	2.02288	0.00196096	NA	GO:0000166(nucleotide binding);GO:0004672(protein kinase activity);GO:0004674(protein serine/threonine kinase activity);GO:0005524(ATP binding);GO:0006468(protein phosphorylation);GO:0016020(membrane);GO:0016021(integral component of membrane);GO:0016301(kinase activity);GO:0016310(phosphorylation);GO:0016310(phosphorylation)
HORVU2Hr1G073920	predicted protein	1.28304	0.00651075	1.79697	0.000158958	3.18977	2.86252e-16	2.1572	1.04787e-07	2.79432	5.31872e-10	3.03462	5.6368e-15	NA	GO:0005515(protein binding);GO:0005515(protein binding)
HORVU5Hr1G109190	predicted protein	1.93069	1	7.68345	3.13692e-07	8.9145	2.23836e-15	4.55756	1.17524e-07	7.00428	1.01523e-10	10.1413	1.20885e-50	NA	GO:0005576(extracellular region);GO:0030145(manganese ion binding);GO:0045735(nutrient reservoir activity);GO:0046872(metal ion binding);GO:0046872(metal ion binding)
HORVU2Hr1G117410	predicted protein	-0.0649638	1	6.22663	6.74019e-08	5.69123	7.96022e-07	5.66552	1.60994e-07	7.68266	6.63431e-11	5.88581	4.81145e-05	NA	NA
HORVU6Hr1G091560	predicted protein	0.775512	0.0790326	1.43644	0.000100246	1.04349	0.00148924	1.73655	1.71787e-07	2.15114	3.28788e-08	1.50717	4.94017e-06	NA	NA
HORVU6Hr1G058620	predicted protein	1.49586	0.114627	5.29294	5.40063e-10	4.47222	1.57246e-13	2.81008	1.73464e-07	3.95032	2.37018e-07	2.0754	0.000633109	NA	GO:0003677(DNA binding);GO:0005634(nucleus);GO:0005634(nucleus)
HORVU1Hr1G037110	predicted protein	3.05616	0.00212549	2.36308	1	2.43824	0.0105975	3.7558	2.1532e-07	2.93152	0.000413555	2.89733	0.00185224	NA	GO:0016020(membrane);GO:0016021(integral component of membrane);GO:0016021(integral component of membrane)
HORVU6Hr1G005900	predicted protein	5.53437	5.01265e-09	4.32962	3.94649e-05	3.5808	1	4.40137	2.23642e-07	4.6903	5.73012e-07	4.14537	9.4688e-07	NA	GO:0016787(hydrolase activity)
HORVU3Hr1G081610	predicted protein	1.66274	2.50148e-05	1.40835	0.00205093	0.470455	0.260735	2.55745	2.61673e-07	2.94355	3.44328e-08	2.57081	5.2657e-06	NA	GO:0016020(membrane);GO:0016021(integral component of membrane);GO:0016021(integral component of membrane)
HORVU4Hr1G010770	predicted protein	5.83645	1	9.34832	6.65689e-16	9.9849	4.21134e-25	4.21055	3.18459e-07	7.54908	1.03649e-17	7.79294	1.83347e-24	NA	NA
HORVU2Hr1G016380	predicted protein	2.04258	0.0180325	2.89687	0.00194003	2.29531	0.0024787	5.08293	3.38756e-07	4.33134	9.8385e-05	4.16229	0.000160854	NA	GO:0003677(DNA binding);GO:0003677(DNA binding)
HORVU7Hr1G047080	predicted protein	1.79387	0.00731683	2.16003	0.000786319	1.0716	0.0954907	4.39309	4.41832e-07	5.20407	9.20768e-09	5.7185	6.01544e-12	NA	GO:0006855(drug transmembrane transport);GO:0015238(drug transmembrane transporter activity);GO:0015297(antiporter activity);GO:0016020(membrane);GO:0016021(integral component of membrane);GO:0042908(xenobiotic transport);GO:0042910(xenobiotic transmembrane transporter activity);GO:0055085(transmembrane transport);GO:0055085(transmembrane transport)
HORVU0Hr1G023200	predicted protein	0.434955	0.778517	1.29998	0.0211468	1.29254	0.0137383	2.43787	5.81053e-07	2.27806	0.00216277	3.1771	2.83524e-09	NA	GO:0004672(protein kinase activity);GO:0005524(ATP binding);GO:0006468(protein phosphorylation);GO:0016020(membrane);GO:0016021(integral component of membrane);GO:0016021(integral component of membrane)
HORVU3Hr1G011330	predicted protein	1.23645	0.000190496	0.532895	0.218249	0.520994	0.0590664	1.75003	5.9966e-07	1.64664	6.39407e-05	1.25834	7.197e-05	NA	GO:0005515(protein binding);GO:0007015(actin filament organization);GO:0007015(actin filament organization)
HORVU7Hr1G048620	predicted protein	1.77388	9.34431e-07	0.803035	0.183855	-0.0922968	0.969347	1.9096	6.22043e-07	1.87126	3.99859e-05	1.47853	6.32478e-05	NA	NA
HORVU3Hr1G012100	predicted protein	1.45087	0.0195861	3.61741	6.18221e-09	3.80015	1.26633e-08	2.45148	6.56015e-07	3.52831	3.48893e-07	3.17485	1.02191e-08	NA	GO:0000166(nucleotide binding);GO:0004672(protein kinase activity);GO:0004674(protein serine/threonine kinase activity);GO:0005524(ATP binding);GO:0006468(protein phosphorylation);GO:0016020(membrane);GO:0016021(integral component of membrane);GO:0016021(integral component of membrane)
HORVU5Hr1G067360	predicted protein	1.87547	0.0100763	5.32844	5.08935e-22	4.7448	3.75738e-26	3.03333	7.58127e-07	5.33127	6.48981e-11	6.42171	5.12614e-41	NA	GO:0004497(monooxygenase activity);GO:0005506(iron ion binding);GO:0016491(oxidoreductase activity);GO:0016705(oxidoreductase activity, acting on paired donors, with incorporation or reduction of molecular oxygen);GO:0020037(heme binding);GO:0046872(metal ion binding);GO:0055114(oxidation-reduction process);GO:0055114(oxidation-reduction process)
HORVU4Hr1G058340	predicted protein	1.31239	0.16766	1.56931	0.0921429	0.821199	0.244359	3.55585	9.64621e-07	4.57771	1.65039e-12	4.38654	1.98242e-12	NA	GO:0004497(monooxygenase activity);GO:0005506(iron ion binding);GO:0016491(oxidoreductase activity);GO:0016705(oxidoreductase activity, acting on paired donors, with incorporation or reduction of molecular oxygen);GO:0020037(heme binding);GO:0046872(metal ion binding);GO:0055114(oxidation-reduction process);GO:0055114(oxidation-reduction process)
HORVU2Hr1G099470	predicted protein	3.02063	7.27556e-07	1.2424	0.134166	1.61301	0.00781764	4.11485	9.75519e-07	3.78655	2.24361e-06	2.73504	0.00375683	NA	GO:0005199(structural constituent of cell wall);GO:0005199(structural constituent of cell wall)
HORVU2Hr1G118060	predicted protein	1.3129	0.132118	4.43454	2.49782e-09	4.04239	4.66485e-13	2.09297	9.97883e-07	3.25223	3.62574e-08	3.24844	1.10822e-15	NA	GO:0030001(metal ion transport);GO:0046872(metal ion binding);GO:0046872(metal ion binding)
HORVU0Hr1G007110	predicted protein	1.18081	0.00840514	1.91494	1.0272e-05	2.77676	4.3622e-09	1.53658	1.22343e-06	1.9175	0.000119304	2.18027	5.37892e-07	NA	GO:0016020(membrane);GO:0016021(integral component of membrane);GO:0016021(integral component of membrane)
HORVU2Hr1G084600	predicted protein	1.15182	0.00678639	2.20716	1.09963e-05	2.12968	8.78463e-10	1.69363	1.30071e-06	2.08142	1.76892e-06	1.9603	6.76501e-07	NA	GO:0005515(protein binding);GO:0005515(protein binding)
HORVU2Hr1G044590	predicted protein	1.57599	0.00288468	2.59293	1.53332e-07	1.98534	1.33722e-05	2.21445	1.462e-06	2.88827	4.53112e-09	2.52485	3.1619e-08	NA	GO:0000166(nucleotide binding);GO:0004672(protein kinase activity);GO:0004674(protein serine/threonine kinase activity);GO:0005524(ATP binding);GO:0006468(protein phosphorylation);GO:0016020(membrane);GO:0016021(integral component of membrane);GO:0016021(integral component of membrane)
HORVU1Hr1G092250	predicted protein	11.2802	1	13.3288	2.26599e-12	9.2166	1	5.40364	1.49838e-06	8.04977	6.32282e-14	6.34474	2.56713e-08	NA	GO:0000166(nucleotide binding);GO:0004672(protein kinase activity);GO:0004674(protein serine/threonine kinase activity);GO:0005524(ATP binding);GO:0006468(protein phosphorylation);GO:0016020(membrane);GO:0016021(integral component of membrane);GO:0016021(integral component of membrane)
HORVU1Hr1G014950	predicted protein	1.79601	0.00616839	2.74134	0.000381583	3.79145	3.78414e-10	3.18567	1.61434e-06	2.99735	5.7197e-05	4.15783	1.93939e-11	NA	GO:0003700(DNA-binding transcription factor activity);GO:0005634(nucleus);GO:0006355(regulation of transcription, DNA-templated);GO:0043565(sequence-specific DNA binding);GO:0043565(sequence-specific DNA binding)
HORVU3Hr1G065650	predicted protein	2.01658	0.0200614	3.29091	0.000386668	5.41634	2.96218e-14	3.18154	1.63752e-06	2.92102	0.000135885	2.90553	3.97062e-05	NA	GO:0016020(membrane);GO:0016021(integral component of membrane);GO:0016021(integral component of membrane)
HORVU7Hr1G106950	predicted protein	0.793143	1	2.92235	0.00142134	3.3976	5.22024e-05	4.10822	1.70627e-06	5.44324	1.43894e-06	6.73427	1.50259e-12	NA	NA
HORVU4Hr1G061340	predicted protein	1.93158	0.026572	3.46065	1.77687e-05	5.00069	5.33482e-15	3.33043	1.80382e-06	2.88828	0.000172811	2.92548	9.22784e-05	NA	GO:0003677(DNA binding);GO:0003700(DNA-binding transcription factor activity);GO:0005634(nucleus);GO:0006351(transcription, DNA-templated);GO:0006355(regulation of transcription, DNA-templated)
HORVU5Hr1G020300	predicted protein	0.848953	0.0906769	2.23842	1.19568e-06	2.0465	5.62421e-09	1.70647	1.9547e-06	2.33688	5.06994e-07	2.40037	1.2975e-09	NA	GO:0003824(catalytic activity);GO:0004721(phosphoprotein phosphatase activity);GO:0004722(protein serine/threonine phosphatase activity);GO:0006470(protein dephosphorylation);GO:0016787(hydrolase activity);GO:0043169(cation binding);GO:0046872(metal ion binding);GO:0046872(metal ion binding)
HORVU6Hr1G020980	predicted protein	0.374457	0.913274	-0.272922	0.4386	0.648548	0.186758	2.28935	2.28817e-06	1.76662	0.00239407	1.51796	0.00102901	NA	GO:0000166(nucleotide binding);GO:0005524(ATP binding);GO:0005524(ATP binding)
HORVU5Hr1G114500	predicted protein	0.517073	0.599359	1.2081	0.0107205	0.885638	0.0360467	1.88997	2.32251e-06	2.55774	6.13147e-08	2.76628	2.1131e-12	NA	GO:0017148(negative regulation of translation);GO:0030598(rRNA N-glycosylase activity);GO:0030598(rRNA N-glycosylase activity)
HORVU4Hr1G004460	predicted protein	0.158791	0.663791	0.946758	0.0629235	-0.0936966	0.867096	2.51471	2.34704e-06	3.06463	7.3445e-09	3.34271	3.11604e-12	NA	GO:0016020(membrane);GO:0016021(integral component of membrane);GO:0022857(transmembrane transporter activity);GO:0055085(transmembrane transport);GO:0055085(transmembrane transport)
HORVU6Hr1G001480	predicted protein	0.718331	0.396194	1.85409	0.00115906	1.54978	0.00239817	2.47834	2.383e-06	3.1959	3.04828e-08	2.92101	3.18261e-07	NA	GO:0016020(membrane);GO:0016021(integral component of membrane);GO:0016021(integral component of membrane)
HORVU6Hr1G060230	predicted protein	0.537439	0.34183	1.26455	0.000698143	2.2642	4.09033e-12	1.51324	2.7405e-06	1.54895	3.34012e-05	1.79381	8.17433e-08	NA	GO:0003723(RNA binding);GO:0008420(RNA polymerase II CTD heptapeptide repeat phosphatase activity);GO:0070940(dephosphorylation of RNA polymerase II C-terminal domain);GO:0070940(dephosphorylation of RNA polymerase II C-terminal domain)
HORVU2Hr1G072150	predicted protein	2.12676	0.0019276	1.39691	0.115805	1.34074	0.0367478	4.4199	2.75963e-06	3.34341	0.00177096	3.83817	7.96277e-05	NA	NA
HORVU1Hr1G025600	predicted protein	0.97032	0.00604356	0.879604	0.0196282	0.705674	0.0136458	1.36758	3.01234e-06	1.44024	4.79493e-05	1.39973	1.52988e-06	NA	GO:0008270(zinc ion binding);GO:0016020(membrane);GO:0016021(integral component of membrane);GO:0046872(metal ion binding);GO:0046872(metal ion binding)
HORVU4Hr1G075070	predicted protein	1.43121	0.106291	5.77113	9.07896e-20	5.90147	2.35893e-24	3.39814	3.01435e-06	7.60751	1.78633e-24	7.73394	1.42996e-36	NA	GO:0006629(lipid metabolic process);GO:0016042(lipid catabolic process);GO:0016787(hydrolase activity);GO:0016787(hydrolase activity)
HORVU6Hr1G061470	predicted protein	1.40582	0.00478802	3.03772	8.72283e-09	2.95296	2.46145e-11	2.07817	3.80368e-06	3.86099	1.5279e-14	4.32528	3.69344e-19	NA	GO:0000166(nucleotide binding);GO:0004672(protein kinase activity);GO:0004674(protein serine/threonine kinase activity);GO:0005524(ATP binding);GO:0006468(protein phosphorylation);GO:0006468(protein phosphorylation)
HORVU2Hr1G123310	predicted protein	-0.408609	0.115888	-0.596798	0.181952	0.607572	0.134061	3.26075	4.96975e-06	3.68518	2.06684e-06	5.18318	5.8898e-16	NA	NA
HORVU5Hr1G085310	predicted protein	3.44542	0.0093615	3.20619	0.0250189	1.9617	1	3.83449	5.20754e-06	3.83176	0.000415738	4.28924	4.00339e-07	NA	GO:0016740(transferase activity);GO:0016757(transferase activity, transferring glycosyl groups);GO:0016758(transferase activity, transferring hexosyl groups)
HORVU1Hr1G012240	predicted protein	1.12828	0.204333	2.78215	0.000981995	2.2754	0.000871334	2.86333	5.4723e-06	2.7818	0.00133861	3.34852	2.50759e-06	NA	GO:0005345(purine nucleobase transmembrane transporter activity);GO:0006863(purine nucleobase transport);GO:0015853(adenine transport);GO:0015854(guanine transport);GO:0016020(membrane);GO:0016021(integral component of membrane);GO:0022857(transmembrane transporter activity);GO:0055085(transmembrane transport);GO:1904823(purine nucleobase transmembrane transport);GO:1904823(purine nucleobase tran…
HORVU1Hr1G081720	predicted protein	0.383435	0.900703	2.82315	4.75079e-10	3.00151	1.55189e-12	2.02001	5.80981e-06	3.57843	2.70655e-12	2.49553	4.79729e-09	NA	NA
HORVU1Hr1G079730	predicted protein	0.235022	0.830898	1.11978	0.121621	1.3671	0.0131458	2.25757	6.93157e-06	2.19734	0.00227105	3.3016	8.92513e-10	NA	NA
HORVU2Hr1G118100	predicted protein	2.99524	1	5.68833	7.73702e-06	5.72176	1.20914e-06	3.92733	7.29822e-06	5.43289	1.88903e-08	5.32698	1.52087e-10	NA	GO:0016020(membrane);GO:0016021(integral component of membrane);GO:0030001(metal ion transport);GO:0046872(metal ion binding);GO:0046872(metal ion binding)
HORVU2Hr1G053670	predicted protein	0.930098	0.0197641	1.18923	0.00200524	1.4421	7.13813e-06	1.41826	8.52776e-06	1.61577	2.31184e-05	1.84293	2.03546e-09	NA	NA
HORVU2Hr1G118110	predicted protein	1.32585	0.0385293	4.89367	2.05022e-16	4.9137	3.48523e-23	1.86263	9.82571e-06	3.61267	1.3272e-09	3.15058	5.08796e-13	NA	GO:0030001(metal ion transport);GO:0046872(metal ion binding);GO:0046872(metal ion binding)
HORVU3Hr1G082210	predicted protein	-0.631674	0.137075	1.7211	0.0197836	1.79581	0.00240066	2.63665	1.0311e-05	3.46496	1.8248e-06	3.79758	4.55392e-12	NA	GO:0003677(DNA binding);GO:0005634(nucleus);GO:0005634(nucleus)
HORVU2Hr1G077990	predicted protein	2.63946	0.00305004	4.34407	8.19575e-08	5.60871	1.82005e-17	3.08737	1.13556e-05	4.01215	5.24466e-07	5.57686	8.24674e-20	NA	GO:0005515(protein binding);GO:0005515(protein binding)
HORVU0Hr1G030080	predicted protein	0.901802	1	5.5566	1.99136e-08	6.85608	9.63155e-16	3.812	1.14327e-05	6.91344	3.21866e-14	8.78384	1.69641e-35	NA	GO:0005515(protein binding);GO:0016020(membrane);GO:0016021(integral component of membrane);GO:0016021(integral component of membrane)
HORVU3Hr1G080770	predicted protein	2.29441	0.0109024	6.25557	6.26532e-15	7.48322	6.33599e-27	3.27163	1.222e-05	5.85483	1.43513e-16	6.48717	2.57803e-15	NA	NA
HORVU6Hr1G066120	predicted protein	0.629867	0.537898	1.16546	0.0774987	1.07755	0.052138	2.32655	1.22932e-05	2.52061	8.54868e-05	3.25221	1.12598e-08	NA	GO:0004672(protein kinase activity);GO:0005524(ATP binding);GO:0006468(protein phosphorylation);GO:0006468(protein phosphorylation)
HORVU0Hr1G022070	predicted protein	2.08021	1	3.52106	0.00190396	2.94288	0.00604616	3.26705	1.50272e-05	4.3929	1.2326e-07	3.91034	4.43004e-08	NA	GO:0000166(nucleotide binding);GO:0004672(protein kinase activity);GO:0004674(protein serine/threonine kinase activity);GO:0005524(ATP binding);GO:0006468(protein phosphorylation);GO:0016301(kinase activity);GO:0016310(phosphorylation);GO:0016740(transferase activity)
HORVU6Hr1G011120	predicted protein	-0.13217	0.15535	0.676683	0.142629	-0.117625	0.98215	1.57037	1.58193e-05	1.76488	0.00134915	3.52758	3.70366e-12	NA	GO:0004364(glutathione transferase activity);GO:0005515(protein binding);GO:0005515(protein binding)
HORVU4Hr1G022420	predicted protein	0.478273	0.459789	1.44903	0.000128941	2.99987	4.46686e-19	1.30078	1.60078e-05	2.37176	3.07979e-11	3.51013	2.11017e-22	NA	GO:0006629(lipid metabolic process);GO:0006629(lipid metabolic process)
HORVU4Hr1G059860	predicted protein	1.13981	0.0797704	3.1602	2.02788e-06	5.11049	2.08263e-21	1.85414	1.61832e-05	3.35278	1.05382e-10	5.51006	6.66914e-29	NA	GO:0016787(hydrolase activity);GO:0016787(hydrolase activity)
HORVU3Hr1G081180	predicted protein	1.23395	0.295675	1.13745	0.309583	-2.56494	1	3.48756	1.64717e-05	3.76202	1.57233e-05	2.8636	0.00202644	NA	GO:0005576(extracellular region);GO:0005618(cell wall);GO:0009664(plant-type cell wall organization);GO:0016020(membrane);GO:0071555(cell wall organization);GO:0071555(cell wall organization)
HORVU4Hr1G066070	predicted protein	1.08886	0.0049672	1.39958	0.00100103	1.37516	2.79932e-05	1.51276	1.69187e-05	1.5938	0.000598177	1.48541	0.000131859	NA	GO:0004842(ubiquitin-protein transferase activity);GO:0005886(plasma membrane);GO:0016567(protein ubiquitination);GO:0061630(ubiquitin protein ligase activity);GO:1900457(regulation of brassinosteroid mediated signaling pathway)
HORVU2Hr1G079200	predicted protein	0.647243	0.275031	1.99974	1.88761e-05	2.46242	1.85125e-11	1.49529	1.74855e-05	2.97066	1.2228e-16	3.39274	2.8351e-19	NA	GO:0003824(catalytic activity);GO:0004722(protein serine/threonine phosphatase activity);GO:0006470(protein dephosphorylation);GO:0016020(membrane);GO:0016021(integral component of membrane);GO:0016021(integral component of membrane)
HORVU1Hr1G070230	predicted protein	0.928622	0.0238591	2.04782	9.93965e-06	2.85803	2.37535e-13	1.29275	1.78236e-05	2.43886	3.66906e-10	4.25023	2.05349e-29	NA	GO:0005622(intracellular);GO:0005623(cell);GO:0006886(intracellular protein transport);GO:0016020(membrane);GO:0016021(integral component of membrane);GO:0016021(integral component of membrane)
HORVU2Hr1G001810	predicted protein	1.11315	0.020843	1.50611	0.00137368	1.25539	0.00291222	1.69292	1.78776e-05	2.33585	7.64184e-08	1.21416	0.00270399	NA	GO:0003723(RNA binding);GO:0003723(RNA binding)
HORVU5Hr1G015190	predicted protein	0.517171	0.646856	-0.447222	0.20231	-0.655698	0.194521	3.85618	2.1229e-05	4.62733	7.43066e-06	3.91946	0.00019027	NA	NA
HORVU4Hr1G008580	predicted protein	0.675194	0.150194	1.16654	0.00176973	2.36561	1.46808e-13	1.42196	2.45017e-05	1.53453	0.000180848	2.32997	2.09003e-10	NA	GO:0005215(transporter activity);GO:0006857(oligopeptide transport);GO:0016020(membrane);GO:0016021(integral component of membrane);GO:0022857(transmembrane transporter activity);GO:0055085(transmembrane transport);GO:0055085(transmembrane transport)
HORVU3Hr1G087050	predicted protein	0.376301	0.864917	1.78733	0.000113627	1.80275	5.51877e-06	1.28753	2.51686e-05	2.49519	1.82725e-12	2.00363	2.46783e-09	NA	GO:0005515(protein binding);GO:0016020(membrane);GO:0016021(integral component of membrane);GO:0016021(integral component of membrane)
HORVU7Hr1G026660	predicted protein	2.48926	0.00318824	4.70995	2.72651e-06	3.57212	1.44638e-06	3.90271	2.76729e-05	5.60483	4.99845e-10	5.26732	2.87465e-11	NA	GO:0000166(nucleotide binding);GO:0004672(protein kinase activity);GO:0004674(protein serine/threonine kinase activity);GO:0005524(ATP binding);GO:0006468(protein phosphorylation);GO:0016020(membrane);GO:0016021(integral component of membrane)
HORVU3Hr1G087110	predicted protein	-1.23038	0.0351926	0.103032	0.978437	1.2284	0.100649	2.21254	2.97301e-05	2.57608	5.799e-08	2.8642	1.51257e-10	NA	GO:0016020(membrane);GO:0016021(integral component of membrane);GO:0016021(integral component of membrane)
HORVU2Hr1G095970	predicted protein	-1.02003	0.0532231	2.15684	0.00900531	3.72429	5.6904e-10	2.4315	3.04751e-05	3.11507	0.000269521	3.50045	2.18046e-07	NA	GO:0000166(nucleotide binding);GO:0004672(protein kinase activity);GO:0004674(protein serine/threonine kinase activity);GO:0004713(protein tyrosine kinase activity);GO:0005524(ATP binding);GO:0006468(protein phosphorylation);GO:0016020(membrane);GO:0016021(integral component of membrane);GO:0018108(peptidyl-tyrosine phosphorylation);GO:0018108(peptidyl-tyrosine phosphorylation)
HORVU5Hr1G082050	predicted protein	1.52775	0.00722751	3.80377	1.74792e-16	4.7976	1.28877e-34	2.1287	3.20697e-05	2.99513	1.55016e-07	3.59461	7.7872e-13	NA	NA
HORVU7Hr1G035670	predicted protein	1.14443	0.000535829	1.00369	0.00681322	1.09092	0.000279721	1.45174	3.22553e-05	1.59282	4.80113e-05	1.13474	8.1733e-05	NA	GO:0005774(vacuolar membrane);GO:0016020(membrane);GO:0016021(integral component of membrane);GO:0016021(integral component of membrane)
HORVU6Hr1G039740	predicted protein	0.973561	0.0134403	1.22887	0.00127585	1.94147	2.84764e-09	1.35069	3.40897e-05	1.79248	3.57361e-06	1.96952	2.15678e-10	NA	GO:0004672(protein kinase activity);GO:0004713(protein tyrosine kinase activity);GO:0005524(ATP binding);GO:0005886(plasma membrane);GO:0006468(protein phosphorylation);GO:0016301(kinase activity);GO:0016310(phosphorylation);GO:0018108(peptidyl-tyrosine phosphorylation);GO:0018108(peptidyl-tyrosine phosphorylation)
HORVU2Hr1G063640	predicted protein	0.791997	0.30327	1.20746	0.0399373	1.19617	0.0093396	2.03774	3.59942e-05	2.29248	0.00234283	2.69178	1.19692e-08	NA	NA
HORVU4Hr1G009560	predicted protein	1.66794	0.0304483	2.88227	4.18596e-05	3.40055	2.6848e-08	2.30235	3.64386e-05	2.40016	1.42868e-05	3.43029	5.09588e-13	NA	GO:0016020(membrane);GO:0016021(integral component of membrane);GO:0016021(integral component of membrane)
HORVU3Hr1G094730	predicted protein	2.20655	4.09356e-06	1.65326	0.00628834	1.71656	0.000129018	2.27164	3.8293e-05	2.28324	0.000610852	2.09507	3.72537e-05	NA	GO:0003677(DNA binding);GO:0005634(nucleus);GO:0046872(metal ion binding);GO:0046872(metal ion binding)
HORVU5Hr1G074030	predicted protein	2.82722	1	7.60552	6.2875e-12	5.61587	2.49191e-07	5.06674	4.39668e-05	5.46203	2.00045e-05	7.65255	3.90709e-15	NA	NA
HORVU4Hr1G078230	predicted protein	0.833359	0.437753	2.11783	0.00208894	1.83871	0.00290012	2.12516	4.47687e-05	2.94779	2.33598e-06	3.40074	2.34813e-12	NA	GO:0006855(drug transmembrane transport);GO:0015238(drug transmembrane transporter activity);GO:0015297(antiporter activity);GO:0016020(membrane);GO:0016021(integral component of membrane);GO:0042908(xenobiotic transport);GO:0042910(xenobiotic transmembrane transporter activity);GO:0055085(transmembrane transport);GO:0055085(transmembrane transport)
HORVU1Hr1G059130	predicted protein	1.66659	0.0542195	2.28938	0.00448564	1.07346	0.112178	3.07635	4.48214e-05	3.18654	4.95209e-05	4.36713	5.30572e-12	NA	GO:0003824(catalytic activity);GO:0004722(protein serine/threonine phosphatase activity);GO:0006470(protein dephosphorylation);GO:0006470(protein dephosphorylation)
HORVU1Hr1G050130	predicted protein	1.43534	0.00104542	1.221	0.00721358	0.877872	0.016471	1.66719	4.48638e-05	1.4814	0.00222987	1.55608	4.39787e-05	NA	GO:0016020(membrane);GO:0016021(integral component of membrane);GO:0016021(integral component of membrane)
HORVU7Hr1G029200	predicted protein	1.07787	0.0534301	2.26062	1.68344e-05	1.50389	0.000653792	1.40407	4.75658e-05	2.39636	1.23749e-07	2.19836	1.31945e-10	NA	GO:0016020(membrane);GO:0016021(integral component of membrane);GO:0055085(transmembrane transport);GO:0055085(transmembrane transport)
HORVU0Hr1G002410	predicted protein	-9.44702	1	6.17095	8.30333e-09	7.04751	1.25763e-13	3.42659	5.2827e-05	5.60506	7.12691e-08	6.60665	5.82027e-17	NA	NA
HORVU7Hr1G052770	predicted protein	1.25596	0.00590034	1.67929	0.00147737	1.31833	0.00343997	1.64766	5.88445e-05	2.11065	5.61796e-06	2.5835	7.11192e-11	NA	GO:0016020(membrane);GO:0016021(integral component of membrane)
HORVU2Hr1G127060	predicted protein	0.166869	0.656032	0.232389	0.814755	-0.121433	0.896636	1.54137	6.28986e-05	2.10161	8.97765e-07	1.49661	2.49046e-05	NA	GO:0016020(membrane);GO:0016021(integral component of membrane)
HORVU1Hr1G081710	predicted protein	0.459625	0.693014	3.01351	1.52289e-10	2.55012	4.10373e-10	1.49104	6.39441e-05	3.91411	1.95066e-18	3.089	9.46443e-16	NA	GO:0004497(monooxygenase activity);GO:0005506(iron ion binding);GO:0016020(membrane);GO:0016021(integral component of membrane);GO:0016491(oxidoreductase activity);GO:0016705(oxidoreductase activity, acting on paired donors, with incorporation or reduction of molecular oxygen);GO:0020037(heme binding);GO:0046872(metal ion binding);GO:0055114(oxidation-reduction process);GO:0055114(oxidation-reduc…
HORVU4Hr1G010030	predicted protein	0.515359	0.616437	3.27128	4.40853e-09	4.13189	3.53234e-15	1.92435	6.88422e-05	3.87917	5.22004e-08	4.32515	8.12292e-09	NA	GO:0000166(nucleotide binding);GO:0004672(protein kinase activity);GO:0004674(protein serine/threonine kinase activity);GO:0005524(ATP binding);GO:0006468(protein phosphorylation);GO:0016020(membrane);GO:0016021(integral component of membrane);GO:0016301(kinase activity);GO:0016310(phosphorylation);GO:0016740(transferase activity);GO:0048544(recognition of pollen);GO:0048544(recognition of pollen)
HORVU3Hr1G031560	predicted protein	-0.442655	0.0256579	1.02099	0.0346114	1.42013	0.000281304	1.37264	6.97542e-05	2.25866	2.14446e-10	1.92744	1.25082e-09	NA	GO:0000166(nucleotide binding);GO:0004672(protein kinase activity);GO:0004674(protein serine/threonine kinase activity);GO:0005524(ATP binding);GO:0006468(protein phosphorylation);GO:0006468(protein phosphorylation)
HORVU7Hr1G122650	predicted protein	0.815749	0.0342623	0.675532	0.0879005	0.554779	0.0476537	1.25144	8.62582e-05	1.51367	6.1077e-05	1.17134	6.50404e-05	NA	GO:0004190(aspartic-type endopeptidase activity);GO:0006508(proteolysis);GO:0016020(membrane);GO:0016021(integral component of membrane);GO:0016021(integral component of membrane)
HORVU5Hr1G088290	predicted protein	1.25636	0.0050784	3.0553	1.38539e-10	4.45668	9.85124e-23	1.39068	8.69115e-05	3.02542	3.51072e-17	4.49638	1.00031e-23	NA	GO:0005515(protein binding);GO:0005515(protein binding)
HORVU3Hr1G055650	predicted protein	-0.274277	0.0559763	0.537316	0.336697	0.642525	0.0717545	1.68799	9.05205e-05	1.62849	8.77257e-06	1.30466	2.26377e-05	NA	NA
HORVU7Hr1G037830	predicted protein	1.08958	0.0265832	1.58077	0.000591526	2.05406	7.78581e-08	1.75547	9.3082e-05	1.87044	0.000310098	1.94127	1.51843e-05	NA	NA
HORVU0Hr1G021810	predicted protein	0.869619	0.382795	1.95197	0.00380337	4.70344	1.71272e-22	2.37338	0.000123834	2.39401	0.000599669	4.81425	6.00127e-22	NA	GO:0005975(carbohydrate metabolic process);GO:0006004(fucose metabolic process);GO:0016020(membrane);GO:0016021(integral component of membrane);GO:0016740(transferase activity);GO:0016757(transferase activity, transferring glycosyl groups);GO:0016757(transferase activity, transferring glycosyl groups)
HORVU2Hr1G114210	predicted protein	3.17126	1	7.90448	2.6859e-16	7.73822	6.61917e-16	3.85713	0.000132486	7.23598	4.69979e-13	7.39244	7.86963e-15	NA	GO:0000166(nucleotide binding);GO:0004672(protein kinase activity);GO:0004674(protein serine/threonine kinase activity);GO:0005509(calcium ion binding);GO:0005524(ATP binding);GO:0006468(protein phosphorylation);GO:0016020(membrane);GO:0016021(integral component of membrane);GO:0016021(integral component of membrane)
HORVU7Hr1G034290	predicted protein	-0.00523273	0.57284	3.24913	1.6252e-05	2.69616	3.19989e-05	2.68934	0.00014834	3.99298	1.58159e-08	3.69994	1.38974e-08	NA	GO:0004672(protein kinase activity);GO:0004713(protein tyrosine kinase activity);GO:0005524(ATP binding);GO:0006468(protein phosphorylation);GO:0018108(peptidyl-tyrosine phosphorylation);GO:0018108(peptidyl-tyrosine phosphorylation)
HORVU6Hr1G067470	predicted protein	1.06193	0.133674	1.48063	0.0173298	1.76506	0.000447604	2.331	0.00016435	3.09764	1.3476e-05	3.62889	2.33326e-11	NA	GO:0004553(hydrolase activity, hydrolyzing O-glycosyl compounds);GO:0005576(extracellular region);GO:0005618(cell wall);GO:0005975(carbohydrate metabolic process);GO:0006073(cellular glucan metabolic process);GO:0008152(metabolic process);GO:0010411(xyloglucan metabolic process);GO:0016740(transferase activity);GO:0016757(transferase activity, transferring glycosyl groups);GO:0016762(xyloglucan:x…
HORVU2Hr1G122580	predicted protein	1.32602	0.357684	5.82227	2.121e-11	7.1606	2.67027e-18	4.24509	0.000167272	5.77052	8.35172e-07	7.82646	3.91629e-19	NA	GO:0009055(electron transfer activity);GO:0016020(membrane);GO:0016021(integral component of membrane);GO:0022900(electron transport chain)
HORVU3Hr1G038000	predicted protein	1.21336	1	4.69438	2.79868e-08	4.26296	6.32904e-10	2.68722	0.00018014	4.64852	1.0023e-10	5.89156	1.09068e-17	NA	GO:0000166(nucleotide binding);GO:0004672(protein kinase activity);GO:0004674(protein serine/threonine kinase activity);GO:0005524(ATP binding);GO:0006468(protein phosphorylation)
HORVU1Hr1G015770	predicted protein	-1.4189	0.00579623	1.863	0.00268189	1.98603	0.000513863	2.4951	0.000215141	5.12537	2.50641e-14	6.74641	2.07863e-30	NA	GO:0000166(nucleotide binding);GO:0004672(protein kinase activity);GO:0004674(protein serine/threonine kinase activity);GO:0005524(ATP binding);GO:0006468(protein phosphorylation);GO:0016020(membrane);GO:0016021(integral component of membrane);GO:0016021(integral component of membrane)
HORVU4Hr1G064070	predicted protein	-1.03361	1	7.19144	1.56152e-16	8.08282	1.34578e-21	2.88153	0.000221903	7.17076	1.09125e-17	9.43466	2.05829e-43	NA	GO:0004842(ubiquitin-protein transferase activity);GO:0016567(protein ubiquitination)
HORVU6Hr1G087730	predicted protein	1.11408	0.00306152	1.36406	0.000776838	1.99541	3.20991e-10	1.40862	0.000223745	1.77461	2.62864e-05	2.2186	4.97507e-10	NA	NA
HORVU2Hr1G063510	predicted protein	1.09012	0.0043182	0.966326	0.0261379	1.6877	2.96378e-06	1.2933	0.000243801	1.51813	0.000640109	1.82329	5.12343e-06	NA	GO:0009055(electron transfer activity);GO:0022900(electron transport chain);GO:0022900(electron transport chain)
HORVU2Hr1G028840	predicted protein	1.01987	0.0226023	0.199156	0.838173	0.891939	0.00519147	1.33866	0.000306057	1.36363	0.0017097	1.2703	9.86779e-05	NA	GO:0003677(DNA binding);GO:0005634(nucleus);GO:0005634(nucleus)
HORVU6Hr1G035730	predicted protein	-0.066852	0.566865	2.15272	0.00772913	2.10497	0.000687897	2.49541	0.00036201	3.54956	7.7388e-05	4.54319	3.98406e-13	NA	GO:0004497(monooxygenase activity);GO:0005506(iron ion binding);GO:0016020(membrane);GO:0016021(integral component of membrane);GO:0016491(oxidoreductase activity);GO:0016705(oxidoreductase activity, acting on paired donors, with incorporation or reduction of molecular oxygen);GO:0020037(heme binding);GO:0046872(metal ion binding);GO:0055114(oxidation-reduction process);GO:0055114(oxidation-reduc…
HORVU7Hr1G043090	predicted protein	0.521059	0.550981	-2.2716	6.44549e-05	-4.16594	1.20346e-12	1.54068	0.000363338	-1.70953	0.00145113	-4.30508	9.46033e-05	NA	GO:0004252(serine-type endopeptidase activity);GO:0006508(proteolysis);GO:0016020(membrane);GO:0016021(integral component of membrane);GO:0016787(hydrolase activity);GO:0016787(hydrolase activity)
HORVU4Hr1G024500	predicted protein	1.48141	0.000141932	-0.627466	0.129581	-1.23941	0.00765161	1.42176	0.000396489	-1.42041	0.00200049	-3.30164	2.53943e-07	NA	GO:0004672(protein kinase activity);GO:0005515(protein binding);GO:0005524(ATP binding);GO:0006468(protein phosphorylation);GO:0016020(membrane);GO:0016021(integral component of membrane);GO:0016021(integral component of membrane)
HORVU2Hr1G028230	predicted protein	0.0921682	0.434966	1.28891	0.00989868	2.18637	1.42654e-07	1.22707	0.000397104	2.82984	1.09648e-14	3.23875	8.87438e-15	NA	GO:0000166(nucleotide binding);GO:0004672(protein kinase activity);GO:0004674(protein serine/threonine kinase activity);GO:0005515(protein binding);GO:0005524(ATP binding);GO:0006468(protein phosphorylation);GO:0009734(auxin-activated signaling pathway);GO:0009742(brassinosteroid mediated signaling pathway);GO:0010305(leaf vascular tissue pattern formation);GO:0010305(leaf vascular tissue pattern…
HORVU2Hr1G126950	predicted protein	0.883424	0.0458599	0.328669	0.622071	0.0128008	0.831028	1.33166	0.00042302	1.97881	1.36855e-06	1.43654	3.07625e-05	NA	GO:0016020(membrane);GO:0016021(integral component of membrane)
HORVU7Hr1G083850	predicted protein	2.41362	1	4.35954	0.000291679	2.83581	1	2.89605	0.00043115	3.13112	0.00034674	3.89339	3.17936e-05	NA	NA
HORVU5Hr1G007320	predicted protein	0.309815	0.993519	0.395968	0.394612	0.397832	0.143755	1.14675	0.000441031	1.18239	0.00244126	1.06534	0.000267658	NA	GO:0016020(membrane);GO:0016021(integral component of membrane);GO:0016021(integral component of membrane)
HORVU4Hr1G084340	predicted protein	-0.518434	0.0459825	1.59068	0.0134237	1.98303	5.02224e-05	1.30206	0.000451854	3.26343	1.40161e-11	4.35398	1.52663e-24	NA	NA
HORVU2Hr1G042220	predicted protein	0.850086	0.439464	4.2943	4.43293e-08	4.72205	9.05915e-19	2.6949	0.000484797	4.36732	2.57587e-08	5.82788	1.94958e-13	NA	GO:0000166(nucleotide binding);GO:0004672(protein kinase activity);GO:0004674(protein serine/threonine kinase activity);GO:0005524(ATP binding);GO:0006468(protein phosphorylation);GO:0016020(membrane);GO:0016021(integral component of membrane);GO:0016301(kinase activity);GO:0016310(phosphorylation);GO:0016740(transferase activity);GO:0048544(recognition of pollen)
HORVU3Hr1G034040	predicted protein	2.5912	0.00896186	3.6731	0.000187403	3.6107	0.000515829	2.48317	0.000527876	3.9978	1.78498e-07	4.42853	6.89091e-13	NA	NA
HORVU7Hr1G083370	predicted protein	1.15525	0.00680515	1.84295	1.17918e-05	3.24892	1.42899e-18	1.15514	0.000532188	1.45935	7.79594e-05	1.83924	1.76695e-09	NA	NA
HORVU4Hr1G076630	predicted protein	0.467532	0.59909	0.923318	0.0462091	1.54859	4.04933e-06	1.24209	0.000536013	1.52265	0.000182941	2.18685	4.2145e-09	NA	GO:0016020(membrane);GO:0016021(integral component of membrane);GO:0055085(transmembrane transport)
HORVU1Hr1G083700	predicted protein	-0.780661	1	3.0698	0.000334601	2.45312	0.00187448	2.59631	0.000538569	2.63259	0.00145491	4.64722	2.26307e-17	NA	GO:0000139(Golgi membrane);GO:0005794(Golgi apparatus);GO:0006486(protein glycosylation);GO:0008378(galactosyltransferase activity);GO:0016020(membrane);GO:0016021(integral component of membrane);GO:0016740(transferase activity);GO:0016757(transferase activity, transferring glycosyl groups)
HORVU1Hr1G001910	predicted protein	1.05626	0.00455409	1.55091	4.4286e-05	2.19856	5.53454e-11	1.09617	0.000542613	1.72456	1.0044e-06	1.97764	2.63496e-10	NA	GO:0000139(Golgi membrane);GO:0003924(GTPase activity);GO:0005525(GTP binding);GO:0005886(plasma membrane);GO:0006888(endoplasmic reticulum to Golgi vesicle-mediated transport);GO:0030742(GTP-dependent protein binding);GO:0032588(trans-Golgi network membrane);GO:0080115(myosin XI tail binding);GO:0080115(myosin XI tail binding)
HORVU5Hr1G098220	predicted protein	4.03997	1	5.47309	1.35675e-06	4.9906	3.01851e-07	3.63989	0.000617405	4.23568	0.000455383	7.10015	1.89712e-12	NA	GO:0005886(plasma membrane);GO:0016020(membrane);GO:0016021(integral component of membrane);GO:0016021(integral component of membrane)
HORVU1Hr1G073210	predicted protein	1.16796	0.0105535	0.885749	0.0671815	0.879359	0.0229995	1.64006	0.000618493	2.23322	9.71109e-07	2.48874	2.74138e-10	NA	NA
HORVU5Hr1G096050	predicted protein	0.272	0.855957	0.708757	0.0822311	0.818072	0.00675541	1.08924	0.000623064	1.49977	1.14161e-05	1.65815	4.35947e-08	NA	NA
HORVU0Hr1G015380	predicted protein	-0.174694	0.316065	1.23178	0.0382564	1.08828	0.0962055	1.303	0.000651539	2.49087	5.75084e-12	3.27525	4.37186e-17	NA	GO:0000166(nucleotide binding);GO:0004672(protein kinase activity);GO:0004674(protein serine/threonine kinase activity);GO:0005524(ATP binding);GO:0006468(protein phosphorylation);GO:0007165(signal transduction);GO:0016020(membrane);GO:0016021(integral component of membrane);GO:0016301(kinase activity);GO:0016310(phosphorylation);GO:0016740(transferase activity);GO:0016740(transferase activity)
HORVU7Hr1G108280	predicted protein	1.80616	0.0374294	4.78183	3.69708e-12	4.92197	2.57422e-17	2.15471	0.000663314	4.04666	1.20327e-11	3.70513	8.88091e-09	NA	GO:0003677(DNA binding);GO:0003700(DNA-binding transcription factor activity);GO:0005634(nucleus);GO:0006351(transcription, DNA-templated);GO:0006355(regulation of transcription, DNA-templated);GO:0046983(protein dimerization activity);GO:0046983(protein dimerization activity)
HORVU5Hr1G011090	predicted protein	1.29716	0.0230696	2.03591	0.00015316	2.76483	5.31338e-11	1.68145	0.000683224	1.92627	0.00113954	2.80824	1.40098e-09	NA	NA
HORVU1Hr1G072250	predicted protein	3.25609	1	2.06707	1	1.86313	1	3.88086	0.000695637	3.1036	0.000274079	6.23978	1.1593e-11	NA	GO:0004553(hydrolase activity, hydrolyzing O-glycosyl compounds);GO:0005975(carbohydrate metabolic process);GO:0008152(metabolic process);GO:0016787(hydrolase activity);GO:0016798(hydrolase activity, acting on glycosyl bonds)
HORVU7Hr1G081400	predicted protein	1.64407	0.00837889	2.05259	0.00244013	2.50305	0.000123047	1.80001	0.000712998	1.93096	0.00136077	2.3886	9.96818e-06	NA	GO:0003690(double-stranded DNA binding);GO:0006355(regulation of transcription, DNA-templated);GO:0006355(regulation of transcription, DNA-templated)
HORVU6Hr1G083680	predicted protein	0.29575	1	1.89647	0.0036298	2.33655	3.86504e-07	1.63253	0.000771783	2.51947	0.000254388	3.16025	1.14919e-14	NA	GO:0004970(ionotropic glutamate receptor activity);GO:0006811(ion transport);GO:0016020(membrane);GO:0016021(integral component of membrane);GO:0035235(ionotropic glutamate receptor signaling pathway);GO:0035235(ionotropic glutamate receptor signaling pathway)
HORVU6Hr1G078650	predicted protein	0.109674	0.580715	0.817003	0.125076	1.12618	0.00279072	1.47087	0.000797828	1.87042	0.00217861	2.97555	7.08866e-14	NA	GO:0008107(galactoside 2-alpha-L-fucosyltransferase activity);GO:0016020(membrane);GO:0016021(integral component of membrane);GO:0036065(fucosylation);GO:0042546(cell wall biogenesis);GO:0042546(cell wall biogenesis)
HORVU5Hr1G046590	predicted protein	1.88127	0.065686	4.35433	2.47314e-06	4.32243	6.70618e-06	3.40144	0.000809598	5.06716	2.72618e-10	6.25467	6.16727e-20	NA	GO:0004672(protein kinase activity);GO:0004674(protein serine/threonine kinase activity);GO:0005524(ATP binding);GO:0006468(protein phosphorylation);GO:0006468(protein phosphorylation)
HORVU3Hr1G091400	predicted protein	-1.00249	0.000633692	-0.398561	0.238693	0.0341579	0.850605	1.3955	0.000810044	2.07532	6.95665e-08	2.14314	4.32357e-09	NA	GO:0016020(membrane);GO:0016021(integral component of membrane);GO:0016740(transferase activity);GO:0016757(transferase activity, transferring glycosyl groups);GO:0016757(transferase activity, transferring glycosyl groups)
HORVU1Hr1G085720	predicted protein	2.5173	0.003627	5.00069	9.67895e-10	6.81037	4.56506e-31	2.98877	0.000866074	5.15605	6.77071e-10	6.21419	2.81515e-16	NA	NA
HORVU7Hr1G038900	predicted protein	2.28976	0.0050975	3.66092	9.49917e-06	2.95245	0.000238792	2.37027	0.000890767	3.86557	6.67114e-06	3.42909	1.62199e-07	NA	NA
HORVU1Hr1G083220	predicted protein	0.678041	0.534866	4.33418	1.33082e-09	5.08115	5.59421e-20	2.60558	0.000908258	6.12783	1.12839e-22	7.55725	7.55325e-35	NA	GO:0000166(nucleotide binding);GO:0004672(protein kinase activity);GO:0004674(protein serine/threonine kinase activity);GO:0005524(ATP binding);GO:0006468(protein phosphorylation);GO:0016020(membrane);GO:0016021(integral component of membrane);GO:0030247(polysaccharide binding);GO:0030247(polysaccharide binding)
HORVU2Hr1G067610	predicted protein	0.592215	0.520676	1.9426	0.00110423	1.74374	3.16884e-05	1.52129	0.000981756	1.93145	0.000197476	2.30908	5.90951e-07	NA	GO:0004842(ubiquitin-protein transferase activity);GO:0005515(protein binding);GO:0005634(nucleus);GO:0005886(plasma membrane);GO:0016567(protein ubiquitination);GO:0048527(lateral root development);GO:0070696(transmembrane receptor protein serine/threonine kinase binding);GO:0071215(cellular response to abscisic acid stimulus);GO:0071215(cellular response to abscisic acid stimulus)
HORVU2Hr1G079240	predicted protein	0.863086	0.085884	2.06199	0.000154991	2.2983	5.95648e-10	1.3765	0.00099356	2.87473	9.24323e-13	3.52869	1.56314e-24	NA	GO:0003824(catalytic activity);GO:0004722(protein serine/threonine phosphatase activity);GO:0006470(protein dephosphorylation);GO:0006470(protein dephosphorylation)
HORVU5Hr1G053170	predicted protein	0.575948	0.381851	1.00642	0.0168767	1.67317	1.55272e-06	1.18606	0.00129359	1.7661	5.07402e-06	2.08397	9.19122e-09	NA	GO:0004672(protein kinase activity);GO:0005524(ATP binding);GO:0006468(protein phosphorylation);GO:0006468(protein phosphorylation)
HORVU2Hr1G118520	predicted protein	1.12888	0.189892	3.44606	1.84554e-08	4.1812	2.25567e-13	1.87857	0.00130285	3.9278	4.97095e-12	4.3307	3.49253e-18	NA	GO:0000145(exocyst);GO:0006887(exocytosis);GO:0015031(protein transport)
HORVU2Hr1G030550	predicted protein	1.09971	0.0242135	1.62441	0.000552579	1.68959	5.90164e-06	1.39562	0.00130322	1.99676	1.35486e-05	1.92551	3.14088e-07	NA	NA
HORVU1Hr1G040050	predicted protein	1.42652	3.95641e-05	0.899992	0.0289176	0.859867	0.00695935	1.15399	0.00132572	1.6823	1.30477e-05	1.12706	0.000177003	NA	GO:0005515(protein binding);GO:0016020(membrane);GO:0016021(integral component of membrane);GO:0016021(integral component of membrane)
HORVU7Hr1G000380	predicted protein	1.19082	0.000505793	1.02951	0.00568234	0.621752	0.0295457	1.05295	0.00138471	1.33925	0.000173276	1.09169	6.84016e-05	NA	GO:0004190(aspartic-type endopeptidase activity);GO:0006508(proteolysis);GO:0016020(membrane);GO:0016021(integral component of membrane);GO:0016021(integral component of membrane)
HORVU5Hr1G098640	predicted protein	2.93809	0.00639994	4.52288	0.000185653	1.6174	1	2.90772	0.00139497	3.33746	0.000260235	4.19707	4.18671e-07	NA	GO:0004672(protein kinase activity);GO:0005524(ATP binding);GO:0006468(protein phosphorylation);GO:0016020(membrane);GO:0016021(integral component of membrane);GO:0030246(carbohydrate binding);GO:0030246(carbohydrate binding)
HORVU4Hr1G058940	predicted protein	1.02135	0.00394473	-1.1303	0.000436725	-1.89551	1.58003e-07	1.07411	0.00144135	-1.92677	1.66118e-06	-2.84054	2.23044e-11	NA	GO:0000786(nucleosome);GO:0003677(DNA binding);GO:0005634(nucleus);GO:0005694(chromosome);GO:0046982(protein heterodimerization activity);GO:0046982(protein heterodimerization activity)
HORVU7Hr1G101460	predicted protein	0.214803	1	0.111259	1	-0.983872	1	3.0049	0.00145796	2.75258	0.000696468	2.75528	0.000896398	NA	NA
HORVU1Hr1G082970	predicted protein	1.38197	0.0158931	1.70096	0.00238537	1.00111	0.0275681	1.45232	0.00160838	1.84184	0.000324328	2.47759	8.66093e-10	NA	NA
HORVU4Hr1G004260	predicted protein	1.57407	0.00164441	1.35989	0.0124244	2.65082	1.57463e-09	1.56985	0.00164155	1.75086	0.00355205	3.70886	9.85322e-17	NA	GO:0006541(glutamine metabolic process);GO:0006541(glutamine metabolic process)
HORVU6Hr1G034570	predicted protein	0.496508	0.818531	3.4173	5.56668e-06	4.91182	6.39305e-12	1.72967	0.00168234	4.19082	1.72647e-11	5.9297	6.45122e-23	NA	GO:0004672(protein kinase activity);GO:0005524(ATP binding);GO:0006468(protein phosphorylation);GO:0016020(membrane);GO:0016021(integral component of membrane);GO:0016021(integral component of membrane)
HORVU6Hr1G020720	predicted protein	0.491805	0.557799	0.829406	0.0602534	1.34331	3.0501e-05	1.27597	0.00169338	1.82799	5.10083e-06	2.01189	9.7208e-10	NA	GO:0003993(acid phosphatase activity);GO:0016311(dephosphorylation);GO:0016787(hydrolase activity);GO:0046872(metal ion binding);GO:0046872(metal ion binding)
HORVU6Hr1G053090	predicted protein	0.0779715	0.708563	3.27223	0.000698742	3.32207	2.46948e-05	2.50668	0.00169503	4.27167	4.33699e-07	3.84086	2.14646e-07	NA	GO:0000166(nucleotide binding);GO:0004672(protein kinase activity);GO:0004674(protein serine/threonine kinase activity);GO:0005524(ATP binding);GO:0006468(protein phosphorylation);GO:0016020(membrane);GO:0016021(integral component of membrane);GO:0030246(carbohydrate binding);GO:0030246(carbohydrate binding)
HORVU5Hr1G019640	predicted protein	1.065	0.0051494	1.20974	0.00264953	1.85431	4.8312e-09	1.13473	0.00194186	1.91824	4.11115e-07	2.08514	2.0052e-11	NA	GO:0000139(Golgi membrane);GO:0005794(Golgi apparatus);GO:0016020(membrane);GO:0016021(integral component of membrane);GO:0016740(transferase activity);GO:0016757(transferase activity, transferring glycosyl groups);GO:0045489(pectin biosynthetic process);GO:0047262(polygalacturonate 4-alpha-galacturonosyltransferase activity);GO:0071555(cell wall organization);GO:0071555(cell wall organization)
HORVU3Hr1G110560	predicted protein	0.909571	0.419558	5.46686	1.09613e-15	5.51581	1.52738e-18	2.6879	0.00198117	6.32054	1.27646e-15	5.8546	1.03287e-11	NA	NA
HORVU6Hr1G022380	predicted protein	0.0781546	0.410699	1.39178	0.00656498	2.12268	2.02468e-07	1.12182	0.00205081	1.97737	4.76023e-08	2.85036	4.92653e-16	NA	GO:0016491(oxidoreductase activity);GO:0055114(oxidation-reduction process);GO:0055114(oxidation-reduction process)
HORVU2Hr1G110880	predicted protein	0.986128	0.17548	3.52197	9.20904e-12	5.04523	1.53083e-36	1.99824	0.00228722	3.78722	2.24542e-10	4.32893	4.60124e-15	NA	NA
HORVU3Hr1G057860	predicted protein	1.91166	0.00346517	2.44174	0.000183552	2.96004	2.55249e-07	2.12921	0.0024278	2.80279	0.000104516	3.40777	1.67947e-06	NA	NA
HORVU1Hr1G070390	predicted protein	-0.432771	0.015858	1.14002	0.0226944	2.6622	7.20869e-10	1.0759	0.00250213	2.09363	1.02194e-07	2.9089	5.30847e-13	NA	GO:0000145(exocyst);GO:0006887(exocytosis);GO:0015031(protein transport)
HORVU2Hr1G044640	predicted protein	0.786766	0.431027	1.25244	0.138234	-0.869037	0.358269	2.2071	0.00262801	2.79627	0.000422	2.26121	0.00206237	NA	GO:0000166(nucleotide binding);GO:0004672(protein kinase activity);GO:0004674(protein serine/threonine kinase activity);GO:0005524(ATP binding);GO:0006468(protein phosphorylation);GO:0016020(membrane);GO:0016021(integral component of membrane);GO:0016021(integral component of membrane)
HORVU2Hr1G075230	predicted protein	2.28313	0.0166131	2.33171	0.0381598	4.77649	9.97783e-09	2.19824	0.00272712	3.54527	0.000146444	3.52682	0.000228986	NA	GO:0004252(serine-type endopeptidase activity);GO:0006508(proteolysis);GO:0016787(hydrolase activity);GO:0016787(hydrolase activity)
HORVU6Hr1G028190	predicted protein	2.72653	1.55124e-13	0.47042	0.540462	0.169551	0.665573	1.20698	0.00275177	-1.616	0.000469044	-4.01389	7.88588e-11	NA	GO:0005874(microtubule);GO:0008017(microtubule binding);GO:0008017(microtubule binding)
HORVU3Hr1G057560	predicted protein	1.92695	0.000811688	0.367116	0.758043	-2.4843	0.00149155	1.38343	0.00276602	-1.72835	0.00129388	-3.24982	1.6402e-05	NA	GO:0010274(hydrotropism)
HORVU3Hr1G099570	predicted protein	0.867503	0.154906	1.04085	0.0416417	3.37277	2.14542e-14	2.32488	0.00281351	3.26837	5.57538e-05	4.83335	1.36536e-14	NA	NA
HORVU4Hr1G053150	predicted protein	1.68127	0.0733425	3.89916	1.76886e-05	3.19121	1.70012e-05	2.27586	0.00283107	3.74493	8.24735e-06	5.89964	1.16065e-20	NA	NA
HORVU2Hr1G096640	predicted protein	-3.15792	3.53726e-32	-0.608332	0.0320147	0.141303	0.529357	-4.12947	5.86222e-53	-2.81503	3.79353e-19	-1.364	0.00147748	NA	NA
HORVU6Hr1G072740	predicted protein	-11.3639	1	-11.3639	1	-11.3639	1	-15.8982	7.25903e-49	-7.34663	5.93426e-20	-15.8982	5.54426e-28	NA	GO:0005739(mitochondrion);GO:0009535(chloroplast thylakoid membrane);GO:0009704(de-etiolation);GO:0071277(cellular response to calcium ion);GO:0090333(regulation of stomatal closure);GO:0090333(regulation of stomatal closure)
HORVU3Hr1G013030	predicted protein	-0.405701	1	3.06298	0.000975658	1.42262	1	-3.75225	1.25112e-34	-4.51155	4.33502e-21	-4.8437	5.09069e-22	NA	NA
HORVU5Hr1G059890	predicted protein	-7.06642	2.49035e-16	-2.27506	0.00529324	-0.696403	0.501255	-5.20285	1.82292e-25	-4.19365	9.08243e-10	1.23478	0.00135724	NA	GO:0008270(zinc ion binding);GO:0046872(metal ion binding)
HORVU4Hr1G075830	predicted protein	-0.629746	0.00010898	-1.24458	0.00011074	-1.61335	1.56207e-05	-2.30642	1.06915e-24	-2.53373	1.19649e-15	-2.44236	3.98297e-09	NA	GO:0003677(DNA binding);GO:0003700(DNA-binding transcription factor activity);GO:0006355(regulation of transcription, DNA-templated);GO:0016602(CCAAT-binding factor complex);GO:0016602(CCAAT-binding factor complex)
HORVU5Hr1G081260	predicted protein	-3.67057	1	-4.05541	1	-4.03191	1	-3.76896	1.41649e-17	-7.33201	2.26402e-19	-5.16062	3.59991e-06	NA	GO:0004497(monooxygenase activity);GO:0005506(iron ion binding);GO:0016020(membrane);GO:0016021(integral component of membrane);GO:0016491(oxidoreductase activity);GO:0016705(oxidoreductase activity, acting on paired donors, with incorporation or reduction of molecular oxygen);GO:0020037(heme binding);GO:0046872(metal ion binding);GO:0055114(oxidation-reduction process)
HORVU2Hr1G117770	predicted protein	-3.62665	5.92425e-12	-2.61541	0.000203713	-2.80356	0.0106662	-4.31093	2.81616e-17	-3.19686	8.06674e-09	-4.8754	3.95942e-09	NA	GO:0008146(sulfotransferase activity);GO:0016740(transferase activity)
HORVU4Hr1G072930	predicted protein	-0.380347	0.210232	0.0468114	0.923538	-0.209261	0.913298	-3.78528	3.31193e-17	-2.87168	2.37445e-07	-2.57309	0.00109307	NA	GO:0003824(catalytic activity);GO:0005975(carbohydrate metabolic process);GO:0009535(chloroplast thylakoid membrane);GO:0009773(photosynthetic electron transport in photosystem I);GO:0010598(NAD(P)H dehydrogenase complex (plastoquinone));GO:0030246(carbohydrate binding);GO:0030246(carbohydrate binding)
HORVU5Hr1G081270	predicted protein	-3.22915	1	-3.75568	1	-11.541	1	-3.77294	9.82313e-17	-7.35429	1.52332e-19	-5.23359	2.65834e-06	NA	GO:0004497(monooxygenase activity);GO:0005506(iron ion binding);GO:0016491(oxidoreductase activity);GO:0016705(oxidoreductase activity, acting on paired donors, with incorporation or reduction of molecular oxygen);GO:0020037(heme binding);GO:0046872(metal ion binding);GO:0055114(oxidation-reduction process)
HORVU4Hr1G043680	predicted protein	-3.48472	1.06376e-25	-1.61837	1.37382e-06	-0.841736	0.029139	-3.13631	4.58724e-16	-2.73713	3.03254e-08	-1.44068	0.00417321	NA	GO:0016020(membrane);GO:0016021(integral component of membrane);GO:0016021(integral component of membrane)
HORVU3Hr1G057180	predicted protein	-4.80769	2.89444e-16	1.077	0.14743	2.76064	2.06318e-07	-2.06846	1.04513e-15	-1.7964	1.68219e-06	1.31516	0.000150337	NA	NA
HORVU5Hr1G059900	predicted protein	-7.38597	4.75529e-18	-2.37261	0.00200729	-0.764256	0.402631	-4.1388	2.11181e-15	-3.10568	1.31198e-06	-2.76918	2.1329e-05	NA	GO:0008270(zinc ion binding);GO:0046872(metal ion binding)
HORVU4Hr1G019310	predicted protein	-9.50064	1	-9.50064	1	-2.63557	1	-13.6189	2.24699e-15	-4.99813	2.09074e-07	-13.6189	4.94484e-11	NA	NA
HORVU2Hr1G065000	predicted protein	-1.40237	0.00344173	-3.36558	5.36893e-06	-4.52986	2.02715e-07	-4.78473	2.82745e-15	-2.71343	0.000145222	-3.2557	7.64584e-05	NA	GO:0016020(membrane);GO:0016021(integral component of membrane);GO:0016021(integral component of membrane)
HORVU0Hr1G022690	predicted protein	-0.997073	0.047971	1.632	0.0847797	-0.653258	0.37	-4.79475	3.17988e-15	-3.53805	1.08675e-06	-5.29562	1.00557e-09	NA	NA
HORVU2Hr1G082320	predicted protein	-11.5917	1	-11.5917	1	-11.5917	1	-13.8166	6.53871e-15	-4.45465	3.52278e-06	-13.8166	1.59026e-10	NA	GO:0003677(DNA binding);GO:0005634(nucleus);GO:0006355(regulation of transcription, DNA-templated);GO:0006355(regulation of transcription, DNA-templated)
HORVU3Hr1G051010	predicted protein	-0.800041	2.84708e-05	-1.31562	0.000368091	-1.26859	0.00027468	-1.84746	2.54598e-14	-1.53316	2.94662e-06	-2.15349	1.1872e-07	NA	GO:0005741(mitochondrial outer membrane);GO:0008308(voltage-gated anion channel activity);GO:0015698(inorganic anion transport);GO:0055085(transmembrane transport);GO:0098656(anion transmembrane transport);GO:0098656(anion transmembrane transport)
HORVU1Hr1G086590	predicted protein	-2.28456	1	-1.41689	1	-3.54414	1	-2.69003	3.69448e-14	-4.01193	5.47846e-13	-6.276	2.4337e-17	NA	GO:0005085(guanyl-nucleotide exchange factor activity);GO:0005089(Rho guanyl-nucleotide exchange factor activity);GO:0016020(membrane);GO:0016021(integral component of membrane);GO:0016021(integral component of membrane)
HORVU1Hr1G015540	predicted protein	-5.36162	1	-2.93028	1	-1.64323	1	-7.96873	5.83169e-14	-6.29964	3.40757e-09	-3.61478	0.000342722	NA	NA
HORVU1Hr1G001440	predicted protein	-7.10277	1	1.67837	1	-0.18724	1	-12.6704	4.93411e-13	-12.6704	5.01359e-11	-12.6704	1.45118e-09	NA	GO:0016020(membrane);GO:0016021(integral component of membrane);GO:0016021(integral component of membrane)
HORVU2Hr1G086860	predicted protein	-4.84732	1	-11.3064	1	-11.3064	1	-12.7686	6.10457e-13	-6.32348	3.58784e-08	-12.7686	1.60872e-09	NA	GO:0005515(protein binding)
HORVU1Hr1G001390	predicted protein	6.95031	1	11.3377	1	7.90387	1	-12.3411	2.33165e-12	-12.3411	1.64856e-10	-12.3411	4.91299e-09	NA	GO:0016020(membrane);GO:0016021(integral component of membrane);GO:0016021(integral component of membrane)
HORVU4Hr1G062120	predicted protein	-0.348141	0.01069	-1.29742	7.84299e-05	-1.49897	4.46988e-05	-1.34596	7.9412e-12	-2.28332	3.02438e-13	-2.86594	1.76576e-13	NA	GO:0005096(GTPase activator activity);GO:0005938(cell cortex);GO:0007165(signal transduction);GO:0009846(pollen germination);GO:0009860(pollen tube growth);GO:0009865(pollen tube adhesion);GO:0016324(apical plasma membrane);GO:0017048(Rho GTPase binding);GO:0035024(negative regulation of Rho protein signal transduction);GO:0043547(positive regulation of GTPase activity);GO:0045177(apical part of …
HORVU3Hr1G033550	predicted protein	-0.38629	0.0566099	-1.49347	0.00947982	-2.92501	2.06333e-05	-1.71017	7.97971e-12	-2.6042	1.44702e-10	-4.80319	1.83485e-06	NA	GO:0004180(carboxypeptidase activity);GO:0004185(serine-type carboxypeptidase activity);GO:0006508(proteolysis);GO:0008233(peptidase activity);GO:0016787(hydrolase activity);GO:0016787(hydrolase activity)
HORVU2Hr1G123150	predicted protein	-1.51569	2.00978e-07	-0.684283	0.0527517	-0.676341	0.11703	-1.80884	1.16969e-11	-1.31975	0.000190021	-2.8495	3.3452e-08	NA	GO:0000166(nucleotide binding);GO:0005524(ATP binding);GO:0016887(ATPase activity);GO:0016887(ATPase activity)
HORVU3Hr1G000550	predicted protein	-2.37975	1	-0.434185	1	0.78227	0.220214	-6.382	2.27716e-11	-4.14695	2.01763e-05	-13.8386	2.88298e-11	NA	NA
HORVU6Hr1G082060	predicted protein	-0.524197	0.00191852	-1.2088	0.000306255	-1.16088	0.00128303	-1.33754	3.20801e-11	-2.02778	2.4711e-11	-2.67015	4.57018e-11	NA	GO:0005524(ATP binding);GO:0005737(cytoplasm);GO:0006457(protein folding);GO:0046914(transition metal ion binding);GO:1901671(positive regulation of superoxide dismutase activity);GO:1901671(positive regulation of superoxide dismutase activity)
HORVU3Hr1G041430	predicted protein	-12.5699	1	-12.5699	1	-12.5699	1	-14.0809	4.29289e-11	-14.0809	1.25284e-09	-6.50614	2.07866e-06	NA	NA
HORVU4Hr1G011740	predicted protein	-0.833738	7.54263e-06	-0.771373	0.0158283	-2.83124	7.86873e-13	-1.48114	4.739e-11	-2.89505	8.25299e-16	-3.14551	8.11957e-12	NA	NA
HORVU5Hr1G052190	predicted protein	-9.32656	1	-9.32656	1	-1.45896	1	-5.35912	6.15292e-11	-3.79463	0.00352924	-5.94812	1.21136e-06	NA	NA
HORVU3Hr1G066330	predicted protein	-4.34631	1	-2.35135	1	-12.2046	1	-5.73621	6.20348e-11	-14.5308	3.90148e-14	-5.18516	3.00765e-05	NA	GO:0005576(extracellular region);GO:0016020(membrane);GO:0016021(integral component of membrane);GO:0030145(manganese ion binding);GO:0045735(nutrient reservoir activity);GO:0046872(metal ion binding)
HORVU7Hr1G105500	predicted protein	0.538793	1	-7.61682	1	-7.61682	1	-6.59197	1.09078e-10	-12.7954	4.52098e-10	-4.64158	0.000151716	NA	GO:0005634(nucleus);GO:0006355(regulation of transcription, DNA-templated);GO:0043565(sequence-specific DNA binding);GO:0046982(protein heterodimerization activity);GO:0046982(protein heterodimerization activity)
HORVU2Hr1G059060	predicted protein	0.499277	0.693719	0.379298	0.637421	0.431587	0.310104	-2.68434	2.33055e-10	-3.64508	8.17047e-09	-4.32451	1.03055e-09	NA	GO:0005515(protein binding);GO:0009416(response to light stimulus);GO:0009507(chloroplast);GO:0009534(chloroplast thylakoid);GO:0009535(chloroplast thylakoid membrane);GO:0009570(chloroplast stroma);GO:0009575(chromoplast stroma);GO:0009579(thylakoid);GO:0009611(response to wounding);GO:0009644(response to high light intensity);GO:0009941(chloroplast envelope);GO:0010206(photosystem II repair);GO…
HORVU0Hr1G002880	predicted protein	-11.9783	1	-11.9783	1	-11.9783	1	-4.77468	8.55593e-10	-4.54175	3.25739e-06	-13.9862	3.6209e-12	NA	NA
HORVU3Hr1G007980	predicted protein	-0.77168	0.000128462	-1.2562	0.000297279	-2.52722	2.62142e-11	-1.10836	3.01683e-09	-1.2347	1.58821e-05	-2.34993	2.56331e-09	NA	GO:0016853(isomerase activity);GO:0016855(racemase and epimerase activity, acting on amino acids and derivatives);GO:0046872(metal ion binding);GO:0046872(metal ion binding)
HORVU5Hr1G021050	predicted protein	-0.371053	0.0142231	-1.84341	4.09434e-07	-3.59896	1.30896e-09	-1.05412	4.86088e-09	-2.04978	1.05666e-09	-5.78556	4.83687e-35	NA	NA
HORVU1Hr1G060110	predicted protein	-2.88391	6.05203e-08	-2.45805	0.000185849	-1.43009	0.0192003	-2.16137	7.159e-09	-4.05353	1.04466e-12	-2.45661	2.72566e-05	NA	NA
HORVU1Hr1G064970	predicted protein	0.661322	1	-10.2295	1	0.411252	1	-4.05688	1.23453e-08	-5.2322	5.09582e-11	-4.77581	3.52661e-08	NA	GO:0016020(membrane);GO:0016021(integral component of membrane);GO:0016021(integral component of membrane)
HORVU3Hr1G055420	predicted protein	-0.121152	0.128788	-0.23431	0.344467	0.17542	0.478264	-1.1949	1.78347e-08	-1.50486	8.99913e-06	-1.57879	0.000138539	NA	GO:0031047(gene silencing by RNA);GO:0031047(gene silencing by RNA)
HORVU5Hr1G081190	predicted protein	0.148693	0.541182	-0.383798	0.189075	-0.40014	0.34071	-1.0287	8.45732e-08	-1.68519	5.05637e-09	-2.69735	2.17177e-11	NA	GO:0005622(intracellular);GO:0008270(zinc ion binding);GO:0008270(zinc ion binding)
HORVU5Hr1G053580	predicted protein	-0.850195	0.000175944	-1.86632	1.49199e-05	-2.86842	2.46363e-10	-1.16985	1.5539e-07	-2.47266	1.25472e-10	-3.49692	4.70634e-13	NA	NA
HORVU6Hr1G019520	predicted protein	-0.916727	1.41605e-05	-1.7379	3.0519e-07	-2.89567	3.21075e-14	-1.14883	2.08054e-07	-2.0666	4.39681e-08	-1.33384	0.00271212	NA	GO:0001671(ATPase activator activity);GO:0032781(positive regulation of ATPase activity);GO:0051087(chaperone binding);GO:0051879(Hsp90 protein binding);GO:0051879(Hsp90 protein binding)
HORVU6Hr1G010890	predicted protein	-0.736591	0.0118603	-3.5631	3.20406e-08	-5.96413	1.51129e-12	-1.49913	3.14893e-07	-4.20413	4.05306e-11	-8.59788	2.66713e-21	NA	NA
HORVU5Hr1G046020	predicted protein	-0.86381	0.000288289	-2.80737	3.02152e-09	-3.5593	1.85628e-11	-1.44647	3.19494e-07	-2.9275	3.81258e-10	-4.01857	8.23222e-13	NA	GO:0000166(nucleotide binding);GO:0004672(protein kinase activity);GO:0004674(protein serine/threonine kinase activity);GO:0005524(ATP binding);GO:0006468(protein phosphorylation);GO:0006468(protein phosphorylation)
HORVU5Hr1G064080	predicted protein	-2.43226	2.82528e-07	-2.49083	1.2784e-05	-1.74124	0.0103433	-2.25527	3.32963e-07	-2.88907	2.29582e-06	-3.08927	2.5686e-05	NA	GO:0004190(aspartic-type endopeptidase activity);GO:0006508(proteolysis);GO:0008233(peptidase activity);GO:0016787(hydrolase activity);GO:0016787(hydrolase activity)
HORVU5Hr1G015050	predicted protein	-0.792856	0.00221661	-1.38553	0.00316752	-2.10007	1.02191e-05	-1.44882	4.03617e-07	-2.29288	2.5824e-06	-2.8353	6.6108e-07	NA	NA
HORVU5Hr1G105780	predicted protein	0.661768	0.421779	-0.220194	0.511578	-1.09218	0.0561735	-1.5237	9.48916e-07	-1.70881	0.000298448	-2.45166	1.62661e-05	NA	GO:0016020(membrane);GO:0016021(integral component of membrane);GO:0016021(integral component of membrane)
HORVU1Hr1G074380	predicted protein	1.49942	0.0831191	-0.523729	1	-1.33622	1	-1.57883	1.86163e-06	-2.83425	8.16746e-09	-4.43158	3.06411e-10	NA	NA
HORVU0Hr1G018270	predicted protein	-0.53968	1	-2.41843	1	-9.36065	1	-3.09056	2.40032e-06	-5.72848	6.16863e-07	-7.32707	1.98544e-09	NA	GO:0004497(monooxygenase activity);GO:0005506(iron ion binding);GO:0016020(membrane);GO:0016021(integral component of membrane);GO:0016491(oxidoreductase activity);GO:0016705(oxidoreductase activity, acting on paired donors, with incorporation or reduction of molecular oxygen);GO:0020037(heme binding);GO:0046872(metal ion binding);GO:0055114(oxidation-reduction process);GO:0055114(oxidation-reduc…
HORVU1Hr1G026780	predicted protein	-0.305634	0.130267	-1.80769	0.000379118	-3.44951	1.45491e-08	-1.31303	3.23593e-06	-2.85842	6.15765e-09	-4.10059	2.89229e-13	NA	NA
HORVU5Hr1G040360	predicted protein	-0.43017	0.304224	-2.89529	1	-4.59022	1	-4.08562	4.32252e-06	-5.87432	1.75388e-07	-13.4084	5.6199e-09	NA	NA
HORVU0Hr1G012390	predicted protein	-3.45933	0.00590457	-6.0881	1.06563e-06	-6.74675	7.24128e-12	-3.06545	4.8384e-06	-12.5794	2.5795e-12	-5.85762	2.07408e-06	NA	GO:0016788(hydrolase activity, acting on ester bonds);GO:0016788(hydrolase activity, acting on ester bonds)
HORVU4Hr1G062010	predicted protein	-2.58348	1	-2.49399	1	-2.18663	1	-2.50677	5.62181e-06	-4.27971	1.558e-07	-14.3459	3.51642e-12	NA	GO:0009055(electron transfer activity);GO:0016020(membrane);GO:0016021(integral component of membrane);GO:0022900(electron transport chain);GO:0022900(electron transport chain)
HORVU0Hr1G018170	predicted protein	-4.42268	1	-2.7863	1	-4.0708	1	-2.98776	6.92974e-06	-7.56689	1.6983e-16	-8.53846	3.71651e-14	NA	GO:0005515(protein binding);GO:0008270(zinc ion binding)
HORVU3Hr1G093100	predicted protein	-3.2943	2.19316e-08	-1.96148	0.0416318	-1.56189	0.0197867	-1.24597	9.20218e-06	-3.77957	8.2385e-07	-3.36951	1.05632e-06	NA	GO:0005504(fatty acid binding);GO:0009627(systemic acquired resistance);GO:0009627(systemic acquired resistance)
HORVU6Hr1G067620	predicted protein	-3.78011	1	-2.63187	1	-4.2955	1	-2.93791	1.06123e-05	-7.50435	7.66493e-17	-8.63934	6.4653e-15	NA	GO:0005515(protein binding);GO:0008270(zinc ion binding)
HORVU7Hr1G052750	predicted protein	-2.59571	4.71766e-17	-1.396	0.00385267	-0.921044	0.0616029	-1.13267	1.06418e-05	-1.45542	0.000249162	-1.66164	0.0043347	NA	GO:0016020(membrane);GO:0016021(integral component of membrane);GO:0055114(oxidation-reduction process);GO:0055114(oxidation-reduction process)
HORVU1Hr1G051160	predicted protein	-1.84316	0.0674688	-13.0571	3.26348e-05	-13.0571	1.65117e-05	-1.55034	1.11079e-05	-6.20698	1.97836e-07	-15.4842	1.25001e-21	NA	GO:0016020(membrane);GO:0016021(integral component of membrane);GO:0016021(integral component of membrane)
HORVU2Hr1G118260	predicted protein	-0.66896	0.00494292	-0.913661	0.0303284	-0.675856	0.133491	-1.25248	1.32546e-05	-1.51537	0.000168137	-1.55859	0.0039422	NA	NA
HORVU3Hr1G094600	predicted protein	-0.593942	0.0109596	-1.0774	0.0113771	-2.2058	1.73146e-05	-1.30435	1.40247e-05	-1.95097	3.70783e-05	-1.77806	0.00118498	NA	GO:0005515(protein binding);GO:0046872(metal ion binding);GO:0046872(metal ion binding)
HORVU3Hr1G049420	predicted protein	-1.25996	0.015834	-4.77156	0.000300951	-6.19125	1.46743e-07	-2.87251	1.48045e-05	-3.55123	0.00135296	-12.9472	1.04471e-11	NA	GO:0006355(regulation of transcription, DNA-templated);GO:0006355(regulation of transcription, DNA-templated)
HORVU7Hr1G035770	predicted protein	-3.36253	4.66283e-05	-3.18747	0.00364347	-12.445	6.12062e-13	-2.9256	1.50215e-05	-4.22418	4.91104e-05	-6.07146	4.54424e-07	NA	GO:0004861(cyclin-dependent protein serine/threonine kinase inhibitor activity);GO:0005634(nucleus);GO:0007050(cell cycle arrest);GO:0045736(negative regulation of cyclin-dependent protein serine/threonine kinase activity);GO:0045736(negative regulation of cyclin-dependent protein serine/threonine kinase activity)
HORVU1Hr1G078480	predicted protein	-0.895241	0.00174277	-1.3272	0.0207456	-1.74401	0.00010502	-2.7388	2.26707e-05	-5.54972	1.69419e-26	-5.07388	6.45162e-27	NA	GO:0000786(nucleosome);GO:0003677(DNA binding);GO:0005634(nucleus);GO:0005694(chromosome);GO:0046982(protein heterodimerization activity);GO:0046982(protein heterodimerization activity)
HORVU2Hr1G087600	predicted protein	-0.568595	0.0488645	-2.10721	0.000685745	-2.65218	6.13329e-06	-1.35169	2.33413e-05	-2.85505	3.94223e-07	-2.45678	0.000314237	NA	GO:0016020(membrane);GO:0016021(integral component of membrane);GO:0016021(integral component of membrane)
HORVU5Hr1G094160	predicted protein	-1.98551	0.00031159	-1.22919	0.0853572	-1.05693	0.113376	-1.46834	2.66859e-05	-1.84983	5.51357e-05	-3.07417	9.14431e-06	NA	NA
HORVU3Hr1G051050	predicted protein	-1.22289	0.00719838	-0.616723	0.273827	-0.598751	0.394067	-1.95594	2.75333e-05	-2.18004	0.000228852	-1.93723	0.00429149	NA	GO:0016020(membrane);GO:0016021(integral component of membrane);GO:0016021(integral component of membrane)
HORVU1Hr1G056500	predicted protein	-0.0452126	0.276119	-1.79001	1.9436e-05	-2.11291	3.42469e-06	-1.00343	2.98355e-05	-2.09019	2.09108e-05	-2.65476	7.53696e-07	NA	GO:0003677(DNA binding);GO:0003700(DNA-binding transcription factor activity);GO:0005634(nucleus);GO:0006351(transcription, DNA-templated);GO:0006355(regulation of transcription, DNA-templated);GO:0006355(regulation of transcription, DNA-templated)
HORVU6Hr1G078510	predicted protein	-5.11039	2.4644e-07	1.62695	0.0550513	3.58398	9.29973e-06	-2.88896	4.24758e-05	3.48462	2.67207e-06	4.08274	2.35395e-09	NA	GO:0003677(DNA binding);GO:0003700(DNA-binding transcription factor activity);GO:0005634(nucleus);GO:0006351(transcription, DNA-templated);GO:0006355(regulation of transcription, DNA-templated);GO:0016020(membrane);GO:0016021(integral component of membrane);GO:0016021(integral component of membrane)
HORVU0Hr1G027670	predicted protein	-0.973133	0.0224537	-2.46164	0.000414234	-1.85415	0.00751096	-1.59912	5.1629e-05	-3.41063	3.32743e-07	-2.83462	5.4205e-05	NA	GO:0005515(protein binding);GO:0005515(protein binding)
HORVU2Hr1G116200	predicted protein	4.22091	2.81306e-09	0.159047	0.989878	-0.173656	0.934182	-1.25827	5.20339e-05	-3.04823	0.00153354	-4.8666	4.48383e-07	NA	NA
HORVU4Hr1G064480	predicted protein	-2.95781	0.00062148	2.50246	0.0112318	3.28985	8.16909e-05	-2.33598	5.40507e-05	2.12634	0.00143895	3.49538	6.38497e-08	NA	GO:0003677(DNA binding);GO:0003700(DNA-binding transcription factor activity);GO:0005634(nucleus);GO:0006351(transcription, DNA-templated);GO:0006355(regulation of transcription, DNA-templated)
HORVU2Hr1G094670	predicted protein	-0.106909	0.417498	-1.50631	0.0310882	-4.47327	4.55175e-08	-1.90509	5.52065e-05	-3.65898	8.06185e-07	-5.28497	5.711e-07	NA	GO:0004252(serine-type endopeptidase activity);GO:0006508(proteolysis)
HORVU2Hr1G072060	predicted protein	-0.689872	0.00772795	-1.55186	0.000847315	-2.03562	8.12642e-05	-1.22386	6.25859e-05	-1.58979	0.000615687	-2.4352	0.000180905	NA	NA
HORVU5Hr1G103400	predicted protein	-0.383571	0.133547	-1.83103	0.00258378	-3.28464	1.19058e-06	-1.67988	7.05327e-05	-2.68803	1.83652e-06	-3.95002	5.7079e-08	NA	GO:0003677(DNA binding);GO:0003700(DNA-binding transcription factor activity);GO:0005634(nucleus);GO:0006351(transcription, DNA-templated);GO:0006355(regulation of transcription, DNA-templated);GO:0006355(regulation of transcription, DNA-templated)
HORVU5Hr1G009460	predicted protein	-1.35533	0.0949767	-3.58736	0.00494845	-5.65919	3.44026e-07	-3.22645	7.77779e-05	-6.77216	2.27851e-10	-4.34489	0.000476333	NA	NA
HORVU4Hr1G051740	predicted protein	0.112506	0.641385	-1.47757	0.00458186	-1.03382	0.05384	-1.17454	9.13097e-05	-2.56131	2.33541e-07	-3.61531	9.27003e-10	NA	GO:0005096(GTPase activator activity);GO:0016020(membrane);GO:0016021(integral component of membrane);GO:0043547(positive regulation of GTPase activity);GO:0046872(metal ion binding);GO:0046872(metal ion binding)
HORVU7Hr1G027870	predicted protein	-0.304924	0.220735	-0.439533	0.364512	-0.865901	0.170171	-1.00281	9.53908e-05	-1.4324	0.000680348	-1.83834	0.000640386	NA	NA
HORVU5Hr1G060370	predicted protein	-1.33018	0.00166916	-1.80097	0.0697623	-6.33666	3.16459e-07	-1.18736	0.000134632	-16.5981	1.3189e-34	-7.51054	4.46441e-13	NA	GO:0016020(membrane);GO:0016021(integral component of membrane);GO:0016021(integral component of membrane)
HORVU4Hr1G031840	predicted protein	-1.3294	0.00188009	-1.80603	0.0680367	-6.25967	4.44951e-07	-1.19791	0.000158097	-16.6875	7.08889e-34	-7.44759	3.48543e-13	NA	GO:0016020(membrane);GO:0016021(integral component of membrane)
HORVU2Hr1G061800	predicted protein	-2.96297	2.10138e-05	-1.72256	0.0244499	-1.75478	0.021734	-1.84081	0.000194939	-2.69696	3.12668e-05	-3.32266	0.000897748	NA	NA
HORVU4Hr1G014530	predicted protein	0.425147	0.822657	-2.23622	0.000962961	-0.422119	0.601132	-1.43741	0.000214901	-3.52633	1.48445e-07	-3.36539	0.00274686	NA	GO:0010215(cellulose microfibril organization);GO:0016020(membrane);GO:0016021(integral component of membrane);GO:0016049(cell growth);GO:0031225(anchored component of membrane);GO:0031225(anchored component of membrane)
HORVU4Hr1G011600	predicted protein	-5.13241	1	-5.05507	1	-4.21831	1	-3.24527	0.000224287	-12.5034	5.92632e-13	-12.5034	2.9048e-11	NA	GO:0005524(ATP binding);GO:0016020(membrane);GO:0016021(integral component of membrane);GO:0016301(kinase activity);GO:0016310(phosphorylation);GO:0016310(phosphorylation)
HORVU3Hr1G059530	predicted protein	0.746398	0.351614	-1.04146	0.0931866	-2.21343	0.00084871	-1.18108	0.000297918	-2.33427	0.00193328	-5.48787	2.28787e-09	NA	NA
HORVU4Hr1G017470	predicted protein	-2.10997	0.000566601	-1.98232	0.0107917	-1.4467	0.0634776	-2.64911	0.000394092	-4.90744	1.10865e-10	-3.77122	8.42512e-06	NA	GO:0008168(methyltransferase activity);GO:0016020(membrane);GO:0016021(integral component of membrane);GO:0032259(methylation);GO:0032259(methylation)
HORVU0Hr1G017250	predicted protein	-0.730879	0.0663721	-1.95425	0.00542146	-4.03243	5.24329e-07	-1.43386	0.000426103	-3.37943	1.70988e-07	-4.36114	1.53096e-06	NA	NA
HORVU1Hr1G044610	predicted protein	-13.4937	4.90945e-08	-13.4937	8.38765e-07	-3.04555	0.00954879	-2.61863	0.00048028	-6.17316	1.34058e-07	-3.77908	0.0019311	NA	NA
HORVU7Hr1G043360	predicted protein	-0.400221	0.0652126	-1.41871	0.00340012	-2.0974	6.37905e-05	-1.00332	0.00053583	-2.04308	6.91577e-05	-1.84804	0.00250975	NA	NA
HORVU1Hr1G021710	predicted protein	0	1	0	1	0	1	-2.19672	0.000550912	-2.95766	0.000422304	-6.93119	8.79531e-09	NA	GO:0016020(membrane);GO:0016021(integral component of membrane);GO:0016021(integral component of membrane)
HORVU5Hr1G027740	predicted protein	-0.520816	0.2028	-1.47	0.0474648	-2.83435	0.000719254	-1.14145	0.000916367	-3.44689	1.37207e-07	-3.99248	4.77591e-08	NA	NA
HORVU3Hr1G049410	predicted protein	-0.480466	0.223985	-4.82395	7.91026e-06	-13.9323	9.1595e-12	-2.13944	0.000957605	-4.50319	0.000238569	-14.0889	2.42413e-10	NA	GO:0006355(regulation of transcription, DNA-templated);GO:0016020(membrane);GO:0016021(integral component of membrane)
HORVU7Hr1G120170	predicted protein	-0.85797	0.0236111	-1.43884	0.0184929	-2.11884	0.00215019	-1.15822	0.00107727	-1.89279	0.000456632	-2.75559	6.58354e-05	NA	GO:0004040(amidase activity);GO:0016020(membrane);GO:0016021(integral component of membrane);GO:0016021(integral component of membrane)
HORVU1Hr1G090610	predicted protein	-4.15473	1	-2.95802	1	-3.39017	1	-3.71134	0.0012431	-5.10044	1.64413e-06	-6.82923	1.3794e-06	NA	GO:0008146(sulfotransferase activity);GO:0016740(transferase activity)
HORVU4Hr1G015330	predicted protein	-2.46475	1.90257e-05	-1.97942	0.00916056	-1.43704	0.0355648	-1.41597	0.0012452	-2.55239	0.000641676	-3.92168	0.000488231	NA	GO:0008942(nitrite reductase [NAD(P)H] activity);GO:0009507(chloroplast);GO:0009534(chloroplast thylakoid);GO:0009535(chloroplast thylakoid membrane);GO:0009941(chloroplast envelope);GO:0010207(photosystem II assembly);GO:0016491(oxidoreductase activity);GO:0042128(nitrate assimilation);GO:0042549(photosystem II stabilization);GO:0051537(2 iron, 2 sulfur cluster binding);GO:0055114(oxidation-redu…
HORVU6Hr1G090110	predicted protein	-0.285205	0.216957	-2.35274	0.00193781	-3.70647	1.13694e-05	-1.30907	0.00125668	-3.96167	7.36896e-05	-6.37631	6.02614e-07	NA	NA
HORVU6Hr1G080760	predicted protein	-0.701096	0.072341	-2.37155	0.00160276	-4.72854	2.14371e-06	-1.2667	0.00151328	-3.17208	8.46497e-07	-4.35993	7.94717e-07	NA	NA
HORVU1Hr1G069560	predicted protein	-6.93761	1	-2.51036	1	-1.69325	1	-1.67009	0.00172401	-11.9278	1.39295e-11	-6.54118	1.61715e-06	NA	GO:0004672(protein kinase activity);GO:0005524(ATP binding);GO:0006468(protein phosphorylation);GO:0009507(chloroplast);GO:0009579(thylakoid);GO:0042549(photosystem II stabilization);GO:0042549(photosystem II stabilization)
HORVU5Hr1G077680	predicted protein	-0.401459	0.0894782	-1.65023	0.00868291	-3.58538	4.38301e-10	-1.19605	0.00177732	-1.7936	0.00222193	-3.2998	4.59686e-06	NA	NA
HORVU2Hr1G080350	predicted protein	-1.84846	0.00606771	-1.03371	0.230463	-2.38247	0.0237858	-1.97797	0.002141	-3.73469	0.000331695	-12.5739	1.02831e-09	NA	GO:0016020(membrane);GO:0016021(integral component of membrane);GO:0016021(integral component of membrane)
HORVU3Hr1G085780	predicted protein, partial	-0.869534	5.46529e-07	-1.2929	3.81526e-05	-2.47973	8.76224e-11	-1.2822	2.30267e-09	-1.39328	8.36692e-07	-1.59806	0.00017025	00010(Glycolysis / Gluconeogenesis);00040(Pentose and glucuronate interconversions);00561(Glycerolipid metabolism);00561(Glycerolipid metabolism)	GO:0016491(oxidoreductase activity);GO:0055114(oxidation-reduction process);GO:0055114(oxidation-reduction process)
HORVU7Hr1G036850	predicted protein, partial	0	1	7.4346	1	0	1	4.15003	2.24689e-13	4.82787	6.53074e-11	6.49744	1.20268e-31	00480(Glutathione metabolism);00480(Glutathione metabolism)	GO:0005515(protein binding);GO:0005515(protein binding)
HORVU5Hr1G077790	predicted protein, partial	4.52753	2.51728e-11	2.8186	0.00224814	2.09193	1	4.71471	4.5935e-23	3.87612	1.62402e-10	3.01778	1.09245e-06	00500(Starch and sucrose metabolism);00460(Cyanoamino acid metabolism);00940(Phenylpropanoid biosynthesis);00940(Phenylpropanoid biosynthesis)	GO:0004553(hydrolase activity, hydrolyzing O-glycosyl compounds);GO:0005975(carbohydrate metabolic process);GO:0005975(carbohydrate metabolic process)
HORVU5Hr1G093140	predicted protein, partial	1.01044	0.0374239	1.01978	0.0360933	1.12889	0.00341305	2.37309	3.97695e-12	2.63652	2.1601e-09	1.52291	0.000530381	00940(Phenylpropanoid biosynthesis);00500(Starch and sucrose metabolism);00500(Starch and sucrose metabolism)	NA
HORVU5Hr1G081200	predicted protein, partial	-3.43482	1.90993e-06	-2.73513	0.00705682	-5.3008	2.06427e-05	-2.94635	5.7289e-07	-2.57795	0.0002338	-6.81814	4.15862e-09	00500(Starch and sucrose metabolism);00500(Starch and sucrose metabolism)	GO:0000272(polysaccharide catabolic process);GO:0003824(catalytic activity);GO:0004553(hydrolase activity, hydrolyzing O-glycosyl compounds);GO:0005975(carbohydrate metabolic process);GO:0008152(metabolic process);GO:0008810(cellulase activity);GO:0009828(plant-type cell wall loosening);GO:0010047(fruit dehiscence);GO:0016787(hydrolase activity);GO:0016798(hydrolase activity, acting on glycosyl b…
HORVU1Hr1G077510	predicted protein, partial	-0.921433	5.96585e-05	-1.1672	0.000601412	0.0578922	0.696553	-1.30127	4.73244e-10	-1.56982	4.5011e-08	-1.99616	4.13781e-07	00785(Lipoic acid metabolism);03018(RNA degradation);03018(RNA degradation)	GO:0000290(deadenylation-dependent decapping of nuclear-transcribed mRNA);GO:0003824(catalytic activity);GO:0005739(mitochondrion);GO:0009107(lipoate biosynthetic process);GO:0009249(protein lipoylation);GO:0009507(chloroplast);GO:0016740(transferase activity);GO:0016783(sulfurtransferase activity);GO:0016992(lipoate synthase activity);GO:0046872(metal ion binding);GO:0051536(iron-sulfur cluster …
HORVU0Hr1G031170	predicted protein, partial	-0.0638201	0.302245	0.70484	0.21708	0.536498	0.177093	1.62692	0.000125559	1.98785	8.11943e-05	2.27447	6.38233e-09	00901(Indole alkaloid biosynthesis);00901(Indole alkaloid biosynthesis)	GO:0016788(hydrolase activity, acting on ester bonds);GO:0016788(hydrolase activity, acting on ester bonds)
HORVU6Hr1G073570	predicted protein, partial	0.599012	0.419634	-1.8557	0.00049379	-2.55312	3.96858e-06	-1.00053	0.000291489	-3.51967	4.92721e-12	-5.52948	2.59122e-09	00500(Starch and sucrose metabolism);00500(Starch and sucrose metabolism)	GO:0000272(polysaccharide catabolic process);GO:0003824(catalytic activity);GO:0004553(hydrolase activity, hydrolyzing O-glycosyl compounds);GO:0005975(carbohydrate metabolic process);GO:0008152(metabolic process);GO:0008810(cellulase activity);GO:0016787(hydrolase activity);GO:0016798(hydrolase activity, acting on glycosyl bonds);GO:0030245(cellulose catabolic process);GO:0030245(cellulose catab…
HORVU3Hr1G023400	predicted protein, partial	0.9082	0.270516	3.32802	3.26643e-08	3.0844	9.19463e-09	2.99056	1.33572e-14	2.50366	0.000114628	2.53516	1.99403e-10	00944(Flavone and flavonol biosynthesis);00944(Flavone and flavonol biosynthesis)	GO:0016740(transferase activity);GO:0016757(transferase activity, transferring glycosyl groups);GO:0016758(transferase activity, transferring hexosyl groups);GO:0016758(transferase activity, transferring hexosyl groups)
HORVU3Hr1G085890	predicted protein, partial	1.15716	0.00896988	2.8611	2.08145e-08	2.4764	1.77695e-10	2.47	6.01157e-18	3.85695	4.34552e-24	4.74848	1.86978e-22	02010(ABC transporters);02010(ABC transporters)	GO:0000166(nucleotide binding);GO:0005524(ATP binding);GO:0016020(membrane);GO:0016021(integral component of membrane);GO:0016887(ATPase activity);GO:0042626(ATPase activity, coupled to transmembrane movement of substances);GO:0055085(transmembrane transport);GO:0099131(ATP hydrolysis coupled ion transmembrane transport);GO:0099131(ATP hydrolysis coupled ion transmembrane transport)
HORVU5Hr1G082940	predicted protein, partial	3.55666	2.20439e-16	2.60463	5.15687e-06	-0.0625414	0.967912	5.07951	6.88795e-34	4.09327	1.63977e-13	2.43175	2.59778e-05	03008(Ribosome biogenesis in eukaryotes);03018(RNA degradation);03018(RNA degradation)	GO:0003676(nucleic acid binding);GO:0004527(exonuclease activity);GO:0090305(nucleic acid phosphodiester bond hydrolysis);GO:0090305(nucleic acid phosphodiester bond hydrolysis)
HORVU5Hr1G052070	predicted protein, partial	-0.730346	0.00132201	-2.13642	1.36222e-06	-1.85613	2.31785e-05	-1.01152	4.31651e-05	-1.40939	0.000310439	-1.73876	0.000916748	03050(Proteasome);03050(Proteasome)	GO:0003676(nucleic acid binding);GO:0004298(threonine-type endopeptidase activity);GO:0005524(ATP binding);GO:0005839(proteasome core complex);GO:0016020(membrane);GO:0016021(integral component of membrane);GO:0051603(proteolysis involved in cellular protein catabolic process);GO:0051603(proteolysis involved in cellular protein catabolic process)
HORVU7Hr1G071470	predicted protein, partial	0.094057	0.486085	-0.663383	0.0597793	-0.664064	0.154888	-1.0591	1.2308e-05	-1.65559	2.74592e-06	-2.5035	3.31312e-08	03410(Base excision repair);03410(Base excision repair)	NA
HORVU6Hr1G091700	predicted protein, partial	1.06466	0.0398395	2.42174	5.22122e-06	1.40392	0.000835694	1.37995	0.000702281	1.92227	3.49756e-05	1.97227	8.23192e-08	04016(MAPK signaling pathway - plant);04075(Plant hormone signal transduction);04075(Plant hormone signal transduction)	GO:0000155(phosphorelay sensor kinase activity);GO:0000160(phosphorelay signal transduction system);GO:0000166(nucleotide binding);GO:0004672(protein kinase activity);GO:0005515(protein binding);GO:0005524(ATP binding);GO:0005622(intracellular);GO:0005783(endoplasmic reticulum);GO:0005789(endoplasmic reticulum membrane);GO:0006468(protein phosphorylation);GO:0007165(signal transduction);GO:000972…
HORVU2Hr1G104030	predicted protein, partial	1.55592	0.0858528	4.49874	3.9389e-09	4.30819	2.73607e-05	5.35367	4.5037e-15	4.69138	1.73119e-08	3.54881	1.11136e-05	04016(MAPK signaling pathway - plant);04626(Plant-pathogen interaction);04626(Plant-pathogen interaction)	GO:0004672(protein kinase activity);GO:0005515(protein binding);GO:0005524(ATP binding);GO:0005768(endosome);GO:0005886(plasma membrane);GO:0006468(protein phosphorylation);GO:0006898(receptor-mediated endocytosis);GO:0010359(regulation of anion channel activity);GO:0016020(membrane);GO:0016021(integral component of membrane);GO:0016045(detection of bacterium);GO:0042742(defense response to bacte…
HORVU2Hr1G034370	predicted protein, partial	1.87914	0.0133987	4.51083	1.78763e-09	4.33283	2.09576e-11	2.99568	5.90154e-13	3.84989	4.64189e-11	5.13767	2.04244e-24	04075(Plant hormone signal transduction);04075(Plant hormone signal transduction)	GO:0000166(nucleotide binding);GO:0002215(defense response to nematode);GO:0004672(protein kinase activity);GO:0004674(protein serine/threonine kinase activity);GO:0005515(protein binding);GO:0005524(ATP binding);GO:0005739(mitochondrion);GO:0005886(plasma membrane);GO:0006468(protein phosphorylation);GO:0009825(multidimensional cell growth);GO:0009845(seed germination);GO:0016020(membrane);GO:00…
HORVU3Hr1G095580	predicted protein, partial	4.20762	1	6.74859	8.48174e-09	8.72142	5.05359e-08	6.56367	3.55659e-08	9.00039	7.24493e-19	8.6517	1.01457e-12	04075(Plant hormone signal transduction);04075(Plant hormone signal transduction)	GO:0009733(response to auxin);GO:0009733(response to auxin)
HORVU4Hr1G081440	predicted protein, partial	4.71143	1	5.46954	1.70276e-05	6.61838	7.0236e-10	3.46225	4.57289e-06	3.54282	7.06439e-05	3.02831	3.74718e-05	04141(Protein processing in endoplasmic reticulum);04120(Ubiquitin mediated proteolysis);03013(RNA transport);03015(mRNA surveillance pathway);03018(RNA degradation);03018(RNA degradation)	GO:0003677(DNA binding);GO:0005634(nucleus);GO:0006355(regulation of transcription, DNA-templated);GO:0006355(regulation of transcription, DNA-templated)
HORVU4Hr1G011100	predicted protein, partial	1.37654	0.0147298	0.853001	0.210191	0.853511	0.0661596	1.41563	0.0019237	2.0328	8.85246e-05	2.45065	9.51191e-10	04141(Protein processing in endoplasmic reticulum);04120(Ubiquitin mediated proteolysis);03420(Nucleotide excision repair);03420(Nucleotide excision repair)	NA
HORVU7Hr1G056700	predicted protein, partial	1.64969	0.0387039	2.63708	0.00041088	3.87883	2.74044e-09	3.40965	4.13501e-10	3.24636	8.6824e-07	3.40482	1.21551e-09	04141(Protein processing in endoplasmic reticulum);04141(Protein processing in endoplasmic reticulum)	GO:0005515(protein binding);GO:0051087(chaperone binding);GO:0051087(chaperone binding)
HORVU2Hr1G011690	predicted protein, partial	-0.864909	1	7.48765	1.54511e-35	8.80768	2.61511e-65	-1.7967	0.00167918	3.72517	1.58957e-09	4.69211	1.67365e-27	04141(Protein processing in endoplasmic reticulum);04141(Protein processing in endoplasmic reticulum)	GO:0000166(nucleotide binding);GO:0005524(ATP binding);GO:0016787(hydrolase activity);GO:0016787(hydrolase activity)
HORVU2Hr1G109330	predicted protein, partial	1.88137	0.0541288	4.7418	1.09917e-07	4.4546	6.53279e-12	3.44915	1.9771e-07	2.67968	0.000567107	2.6186	0.000685146	04626(Plant-pathogen interaction)	GO:0003677(DNA binding);GO:0003700(DNA-binding transcription factor activity);GO:0005634(nucleus);GO:0006355(regulation of transcription, DNA-templated);GO:0043565(sequence-specific DNA binding)
HORVU1Hr1G090170	predicted protein, partial	2.08162	1	6.27335	7.49035e-11	5.77603	1.9473e-08	3.50673	2.36181e-06	4.22656	2.1331e-08	3.00531	0.000234014	04626(Plant-pathogen interaction)	GO:0003677(DNA binding);GO:0003700(DNA-binding transcription factor activity);GO:0005634(nucleus);GO:0006355(regulation of transcription, DNA-templated);GO:0043565(sequence-specific DNA binding)
HORVU0Hr1G012740	predicted protein, partial	2.84741	0.0234012	4.95923	6.36432e-05	5.44962	1.48074e-06	6.01885	4.06482e-35	5.90649	6.97651e-14	5.46629	1.20722e-11	04626(Plant-pathogen interaction);04626(Plant-pathogen interaction)	GO:0003677(DNA binding);GO:0003700(DNA-binding transcription factor activity);GO:0005634(nucleus);GO:0006355(regulation of transcription, DNA-templated);GO:0043565(sequence-specific DNA binding);GO:0043565(sequence-specific DNA binding)
HORVU5Hr1G034830	predicted protein, partial	1.67867	0.00760085	3.69755	2.78919e-08	4.09639	1.67556e-16	5.63912	8.43893e-32	5.41053	9.48115e-17	3.59347	4.44662e-08	04626(Plant-pathogen interaction);04626(Plant-pathogen interaction)	GO:0003677(DNA binding);GO:0003700(DNA-binding transcription factor activity);GO:0005634(nucleus);GO:0006355(regulation of transcription, DNA-templated);GO:0043565(sequence-specific DNA binding);GO:0043565(sequence-specific DNA binding)
HORVU0Hr1G012750	predicted protein, partial	1.88467	0.0893935	4.17332	0.0001036	4.85933	1.18641e-08	6.7008	2.54643e-24	6.33298	3.7078e-09	5.89615	2.98532e-10	04626(Plant-pathogen interaction);04626(Plant-pathogen interaction)	GO:0003677(DNA binding);GO:0003700(DNA-binding transcription factor activity);GO:0005634(nucleus);GO:0006355(regulation of transcription, DNA-templated);GO:0043565(sequence-specific DNA binding);GO:0043565(sequence-specific DNA binding)
HORVU2Hr1G029460	predicted protein, partial	2.66821	0.0050142	7.74514	2.37078e-24	8.59241	4.77467e-29	2.89272	2.95148e-05	6.50933	3.38974e-14	5.88628	1.22722e-23	04626(Plant-pathogen interaction);04626(Plant-pathogen interaction)	NA
HORVU2Hr1G029450	predicted protein, partial	0.800535	1	6.31295	2.7008e-07	6.40055	9.7579e-11	3.21115	0.000945841	4.50341	1.13504e-05	5.74115	1.85043e-06	04626(Plant-pathogen interaction);04626(Plant-pathogen interaction)	NA
HORVU5Hr1G022790	predicted protein, partial	4.2563	8.14143e-05	2.77901	0.0118803	-1.69775	0.473961	18.002	4.42321e-104	17.2607	2.36657e-38	14.5926	1.8222e-19	NA	GO:0003993(acid phosphatase activity);GO:0016311(dephosphorylation);GO:0016787(hydrolase activity);GO:0046872(metal ion binding);GO:0046872(metal ion binding)
HORVU4Hr1G077310	predicted protein, partial	1.70889	4.06098e-06	0.711329	0.162934	-1.60291	0.00582582	2.77588	1.16552e-21	1.81294	7.78335e-05	1.04713	0.00300238	NA	GO:0003677(DNA binding);GO:0003700(DNA-binding transcription factor activity);GO:0005634(nucleus);GO:0006351(transcription, DNA-templated);GO:0006355(regulation of transcription, DNA-templated);GO:0006355(regulation of transcription, DNA-templated)
HORVU2Hr1G015360	predicted protein, partial	5.43202	1.4503e-07	6.0878	2.042e-08	3.56654	1	5.44974	2.19128e-11	4.22501	3.87276e-05	4.71854	4.79588e-08	NA	NA
HORVU4Hr1G078690	predicted protein, partial	0.783189	0.281865	2.4759	7.90645e-06	2.46837	5.07891e-08	2.96646	1.52445e-10	4.04895	2.36344e-14	4.99725	3.40679e-30	NA	GO:0003924(GTPase activity);GO:0005525(GTP binding);GO:0005525(GTP binding)
HORVU5Hr1G081090	predicted protein, partial	1.14195	0.0187877	1.68628	8.01329e-05	2.59023	1.54783e-12	2.07896	3.31774e-10	2.33488	6.06043e-07	2.89003	3.85801e-13	NA	GO:0003677(DNA binding);GO:0003700(DNA-binding transcription factor activity);GO:0005634(nucleus);GO:0006355(regulation of transcription, DNA-templated);GO:0043565(sequence-specific DNA binding);GO:0043565(sequence-specific DNA binding)
HORVU3Hr1G026520	predicted protein, partial	1.2764	0.271026	-0.336447	0.588362	-1.35882	0.187409	3.90092	3.95125e-10	2.80816	0.000209722	2.83299	0.000248247	NA	NA
HORVU6Hr1G018920	predicted protein, partial	1.73748	0.00769754	3.08081	5.0084e-06	2.13537	0.000282949	3.04366	8.38736e-09	3.54952	9.81154e-10	2.00653	0.000545282	NA	GO:0043531(ADP binding)
HORVU1Hr1G054470	predicted protein, partial	0.908278	0.0747874	2.03619	7.83971e-06	2.60543	3.32766e-11	2.08859	1.49778e-08	3.46308	2.36645e-20	3.84227	1.07797e-28	NA	GO:0005768(endosome);GO:0005774(vacuolar membrane);GO:0005794(Golgi apparatus);GO:0005802(trans-Golgi network);GO:0008168(methyltransferase activity);GO:0009505(plant-type cell wall);GO:0016020(membrane);GO:0016021(integral component of membrane);GO:0032259(methylation);GO:0032259(methylation)
HORVU7Hr1G020830	predicted protein, partial	2.68832	1.38158e-05	1.95616	0.00936968	-1.82611	0.0467407	4.31853	2.09006e-08	3.54604	8.4531e-05	2.36493	0.000290177	NA	GO:0016020(membrane);GO:0016021(integral component of membrane);GO:0016021(integral component of membrane)
HORVU2Hr1G048100	predicted protein, partial	0.359103	1	1.66522	0.0857153	3.52329	1.14571e-06	3.47227	4.00408e-08	3.0771	2.57652e-05	3.39124	2.45393e-07	NA	NA
HORVU7Hr1G101710	predicted protein, partial	1.33402	0.067559	2.57336	2.3174e-05	1.34212	0.0483359	2.07509	3.67832e-07	2.62057	1.50892e-06	3.13756	1.58135e-15	NA	GO:0016740(transferase activity);GO:0016757(transferase activity, transferring glycosyl groups);GO:0016758(transferase activity, transferring hexosyl groups);GO:0016758(transferase activity, transferring hexosyl groups)
HORVU3Hr1G052980	predicted protein, partial	1.43738	0.0130819	2.0888	0.000100547	1.55836	0.00084974	2.2543	4.15594e-07	2.26159	9.88342e-05	2.58363	4.27147e-09	NA	GO:0005515(protein binding);GO:0005774(vacuolar membrane);GO:0005783(endoplasmic reticulum);GO:0005886(plasma membrane);GO:0016020(membrane);GO:0016021(integral component of membrane);GO:0016021(integral component of membrane)
HORVU6Hr1G076820	predicted protein, partial	-0.227773	0.375237	1.35054	0.189718	1.85555	0.00349945	2.62145	4.29994e-07	3.74416	1.06028e-11	5.38379	5.88701e-24	NA	GO:0016020(membrane);GO:0016021(integral component of membrane);GO:0016740(transferase activity);GO:0016757(transferase activity, transferring glycosyl groups);GO:0016757(transferase activity, transferring glycosyl groups)
HORVU5Hr1G084490	predicted protein, partial	-0.596783	0.0604166	0.179709	0.937445	-0.374626	0.517036	2.2232	1.29986e-06	2.82702	3.16093e-06	2.88051	1.33968e-09	NA	GO:0004190(aspartic-type endopeptidase activity);GO:0006508(proteolysis);GO:0008233(peptidase activity);GO:0016787(hydrolase activity);GO:0016787(hydrolase activity)
HORVU7Hr1G116810	predicted protein, partial	0.0924817	1	3.95146	0.00112611	3.17935	0.003771	3.494	1.98935e-06	4.59694	2.12358e-06	6.10803	4.82535e-18	NA	GO:0004190(aspartic-type endopeptidase activity);GO:0006508(proteolysis);GO:0006508(proteolysis)
HORVU4Hr1G017390	predicted protein, partial	0.332209	0.998429	1.59607	0.000321924	2.1666	6.91719e-08	1.55721	3.94015e-06	2.67112	1.29691e-11	2.78954	1.01295e-13	NA	GO:0004190(aspartic-type endopeptidase activity);GO:0006508(proteolysis);GO:0008233(peptidase activity);GO:0016787(hydrolase activity);GO:0016787(hydrolase activity)
HORVU3Hr1G084450	predicted protein, partial	2.2684	0.00224538	0.909424	0.308752	0.852	0.191881	2.80186	6.06685e-06	2.22805	0.00267421	2.21941	0.000448602	NA	GO:0005506(iron ion binding);GO:0016705(oxidoreductase activity, acting on paired donors, with incorporation or reduction of molecular oxygen);GO:0020037(heme binding);GO:0055114(oxidation-reduction process)
HORVU5Hr1G011460	predicted protein, partial	0.93244	0.00649189	1.67924	9.84947e-06	1.11995	0.000195041	1.29681	3.66225e-05	1.92282	5.29229e-08	1.01024	0.00138501	NA	GO:0003676(nucleic acid binding);GO:0003723(RNA binding);GO:0004386(helicase activity);GO:0005524(ATP binding);GO:0005634(nucleus);GO:0008270(zinc ion binding);GO:0008270(zinc ion binding)
HORVU2Hr1G126930	predicted protein, partial	0	1	0	1	0	1	3.34175	5.76144e-05	4.25861	5.02079e-07	5.41075	3.40977e-11	NA	NA
HORVU2Hr1G029430	predicted protein, partial	2.007	1	7.21962	6.77355e-18	8.20234	1.20839e-26	3.84132	0.000114111	7.09885	4.79758e-13	6.90002	2.03479e-16	NA	GO:0003677(DNA binding);GO:0003700(DNA-binding transcription factor activity);GO:0005634(nucleus);GO:0006355(regulation of transcription, DNA-templated);GO:0043565(sequence-specific DNA binding);GO:0043565(sequence-specific DNA binding)
HORVU2Hr1G127220	predicted protein, partial	0.560958	0.34222	0.579575	0.211539	0.0879619	0.622067	1.35877	0.000127652	1.86129	2.06626e-06	1.38231	1.28625e-05	NA	GO:0008168(methyltransferase activity);GO:0016020(membrane);GO:0016021(integral component of membrane);GO:0032259(methylation);GO:0032259(methylation)
HORVU5Hr1G069980	predicted protein, partial	0.622978	1	5.22557	3.71297e-06	6.24771	1.97731e-11	2.81173	0.000155009	4.59657	1.3405e-06	7.28035	2.4522e-26	NA	GO:0016020(membrane);GO:0016021(integral component of membrane)
HORVU1Hr1G077320	predicted protein, partial	1.32311	0.00963065	0.601217	0.363406	2.70683	1.02601e-11	1.90713	0.000197493	2.5731	1.12886e-06	2.76963	6.12607e-07	NA	GO:0004180(carboxypeptidase activity);GO:0004185(serine-type carboxypeptidase activity);GO:0006508(proteolysis);GO:0008233(peptidase activity);GO:0016787(hydrolase activity);GO:0016787(hydrolase activity)
HORVU7Hr1G113370	predicted protein, partial	2.02796	1	8.98066	2.32585e-12	9.73241	1.75457e-21	3.75243	0.000292163	8.76146	8.88143e-21	9.668	8.27592e-25	NA	GO:0000166(nucleotide binding);GO:0004672(protein kinase activity);GO:0004674(protein serine/threonine kinase activity);GO:0005524(ATP binding);GO:0006468(protein phosphorylation);GO:0016020(membrane);GO:0016021(integral component of membrane);GO:0030246(carbohydrate binding);GO:0030246(carbohydrate binding)
HORVU3Hr1G081380	predicted protein, partial	1.29111	0.0691197	2.86796	1.37192e-06	3.3373	1.02706e-12	2.06757	0.000490145	3.60828	7.11672e-11	4.02082	1.86416e-15	NA	GO:0005515(protein binding);GO:0005515(protein binding)
HORVU7Hr1G001420	predicted protein, partial	1.96323	0.00373796	2.02844	0.00635161	1.30032	0.0375589	2.09035	0.00163715	3.06692	2.53096e-06	2.59468	1.41167e-05	NA	GO:0004672(protein kinase activity);GO:0005524(ATP binding);GO:0006468(protein phosphorylation);GO:0006468(protein phosphorylation)
HORVU2Hr1G126100	predicted protein, partial	-0.650073	0.0148326	-0.374034	0.311805	-0.249772	0.793584	-3.01947	1.46609e-19	-2.16773	0.000152234	-1.96637	0.000128591	NA	GO:0016020(membrane);GO:0016021(integral component of membrane);GO:0022857(transmembrane transporter activity);GO:0055085(transmembrane transport);GO:0055085(transmembrane transport)
HORVU2Hr1G092000	predicted protein, partial	-3.10257	0.0128538	-12.8272	8.06841e-05	-12.8272	3.20413e-05	-14.5407	2.39526e-17	-14.5407	5.0418e-14	-14.5407	3.92017e-12	NA	GO:0007275(multicellular organism development);GO:0007275(multicellular organism development)
HORVU5Hr1G078110	predicted protein, partial	-0.684166	0.000407682	0.105285	0.930595	-0.491139	0.198947	-2.07023	1.48043e-16	-1.56258	5.69344e-07	-2.02337	1.03859e-06	NA	NA
HORVU3Hr1G013290	predicted protein, partial	-12.674	1	-2.56928	1	-4.15738	1	-14.4915	1.60208e-16	-14.4915	1.80219e-13	-4.87342	2.57698e-06	NA	GO:0003677(DNA binding);GO:0005634(nucleus);GO:0005634(nucleus)
HORVU2Hr1G032890	predicted protein, partial	-0.464367	0.158979	-2.23115	0.0013681	-3.143	0.0117691	-2.43354	3.28046e-12	-6.72379	1.41005e-08	-16.0858	3.10444e-32	NA	GO:0004497(monooxygenase activity);GO:0005506(iron ion binding);GO:0016491(oxidoreductase activity);GO:0016705(oxidoreductase activity, acting on paired donors, with incorporation or reduction of molecular oxygen);GO:0020037(heme binding);GO:0046872(metal ion binding);GO:0055114(oxidation-reduction process);GO:0055114(oxidation-reduction process)
HORVU2Hr1G097180	predicted protein, partial	-11.7302	1	-6.22459	1	-5.13871	1	-13.627	2.10984e-09	-13.627	1.50717e-08	-7.47808	5.62056e-06	NA	NA
HORVU5Hr1G020500	predicted protein, partial	-4.31552	1	-12.5021	1	-12.5021	1	-3.94285	2.84495e-09	-6.68091	1.22679e-09	-14.12	6.80029e-13	NA	NA
HORVU5Hr1G086660	predicted protein, partial	-9.37278	1	0.717005	1	-1.37526	1	-3.71713	5.81478e-09	-5.79245	2.19256e-12	-3.50731	2.84118e-05	NA	GO:0004497(monooxygenase activity);GO:0004499(N,N-dimethylaniline monooxygenase activity);GO:0016491(oxidoreductase activity);GO:0050660(flavin adenine dinucleotide binding);GO:0050661(NADP binding);GO:0055114(oxidation-reduction process);GO:0055114(oxidation-reduction process)
HORVU3Hr1G005830	predicted protein, partial	-0.667399	0.00282899	-1.11146	0.00456169	-2.03186	1.56105e-05	-1.08334	4.68243e-07	-1.83472	3.88623e-07	-3.40423	1.72662e-11	NA	GO:0016020(membrane);GO:0016021(integral component of membrane);GO:0016021(integral component of membrane)
HORVU6Hr1G043210	predicted protein, partial	-0.538793	0.000267901	-1.82637	1.08553e-08	-2.87111	9.21701e-17	-1.00445	6.20445e-07	-2.15059	8.69971e-10	-2.75945	5.7815e-12	NA	NA
HORVU2Hr1G124800	predicted protein, partial	-0.910846	0.028603	-3.72515	0.000478477	-14.7287	2.09219e-16	-1.38834	6.39152e-06	-3.9837	4.71206e-12	-5.26321	1.5524e-11	NA	GO:0005623(cell);GO:0006662(glycerol ether metabolic process);GO:0015035(protein disulfide oxidoreductase activity);GO:0045454(cell redox homeostasis);GO:0045454(cell redox homeostasis)
HORVU4Hr1G073730	predicted protein, partial	-0.186134	0.215888	-0.919746	0.0526583	-0.868709	0.116239	-1.04824	2.54342e-05	-2.76338	1.02429e-08	-3.60858	6.00151e-12	NA	NA
HORVU7Hr1G054190	predicted protein, partial	-0.435699	0.0603797	-1.64005	0.00194649	-3.04987	7.14443e-08	-1.36029	4.5319e-05	-2.54455	6.4624e-06	-5.89981	2.19536e-10	NA	GO:0003725(double-stranded RNA binding);GO:0003725(double-stranded RNA binding)
HORVU1Hr1G068430	predicted protein, partial	1.50368	0.134235	0.789948	0.485561	0.394615	1	-2.08969	5.29083e-05	-2.80637	4.46012e-05	-4.87685	1.12831e-08	NA	GO:0005515(protein binding);GO:0009744(response to sucrose);GO:0043562(cellular response to nitrogen levels);GO:0043562(cellular response to nitrogen levels)
HORVU2Hr1G025430	predicted protein, partial	-0.70349	0.00944464	-1.72255	0.000955487	-1.99438	0.000150034	-1.07374	0.000278564	-2.22894	1.49412e-05	-2.76768	8.96088e-06	NA	NA
HORVU0Hr1G018980	predicted protein, partial	10.0011	1	11.9983	1	13.1179	1	-1.92688	0.00100734	-14.0512	1.56301e-10	-14.0512	3.89406e-09	NA	NA
HORVU5Hr1G063420	predicted protein, partial	-1.21315	0.00553335	2.81727	0.000111379	4.40112	2.71832e-20	-1.36666	0.00178978	2.19639	2.89843e-05	3.57327	2.61104e-10	NA	GO:0004970(ionotropic glutamate receptor activity);GO:0006811(ion transport);GO:0016020(membrane);GO:0016021(integral component of membrane);GO:0035235(ionotropic glutamate receptor signaling pathway);GO:0035235(ionotropic glutamate receptor signaling pathway)
HORVU1Hr1G016320	PREDICTED: formin-like protein 6 isoform X1	-1.19437	0.166636	-1.26788	0.000463235	-1.56295	0.000415735	-1.43219	3.25705e-08	-2.37842	3.48632e-09	-4.99461	3.34189e-14	04933(AGE-RAGE signaling pathway in diabetic complications);04933(AGE-RAGE signaling pathway in diabetic complications)	NA
HORVU6Hr1G047760	PREDICTED: uncharacterized protein LOC103439578	-0.302469	0.142857	-1.28932	0.0107531	-1.76168	0.00112873	-1.03002	9.9592e-05	-2.10534	2.26435e-06	-2.55172	3.96687e-06	NA	NA
HORVU5Hr1G123280	PREDICTED: uncharacterized protein LOC104609609	0	1	0	1	0	1	14.0612	1.14119e-11	16.9913	8.74094e-20	17.4473	2.1927e-22	NA	NA
HORVU7Hr1G100310	probable 2-oxoglutarate-dependent dioxygenase At3g49630	1.81676	0.000376006	0.440156	0.696467	-0.992297	0.142108	4.67141	4.10689e-23	4.65078	3.96042e-16	3.92026	1.42146e-09	00904(Diterpenoid biosynthesis);00941(Flavonoid biosynthesis);00941(Flavonoid biosynthesis)	GO:0016491(oxidoreductase activity);GO:0046872(metal ion binding);GO:0055114(oxidation-reduction process);GO:0055114(oxidation-reduction process)
HORVU5Hr1G120920	probable acyl-activating enzyme 16, chloroplastic	-0.314499	0.0254404	-1.44292	9.60453e-05	-2.68685	3.03415e-10	-1.40584	7.25383e-12	-2.08555	3.41443e-09	-4.3352	6.71883e-20	00061(Fatty acid biosynthesis);00071(Fatty acid degradation);04146(Peroxisome);04146(Peroxisome)	NA
HORVU6Hr1G051560	probable bifunctional riboflavin biosynthesis protein RIBA 2, chloroplastic isoform X1	1.02326	0.124429	2.75716	1.06308e-06	2.91101	1.8852e-08	2.67744	5.07813e-14	4.10764	3.56413e-23	5.50955	9.07195e-27	00740(Riboflavin metabolism);00790(Folate biosynthesis);00790(Folate biosynthesis)	GO:0003935(GTP cyclohydrolase II activity);GO:0008686(3,4-dihydroxy-2-butanone-4-phosphate synthase activity);GO:0009231(riboflavin biosynthetic process);GO:0009231(riboflavin biosynthetic process)
HORVU1Hr1G091170	probable calcium-binding protein CML14	0.253246	0.904782	1.58031	0.0441934	1.94915	0.00192158	3.19613	2.16176e-06	4.11489	3.64928e-08	5.23397	1.20327e-16	04626(Plant-pathogen interaction)	NA
HORVU3Hr1G099740	probable disease resistance RPP8-like protein 2 isoform X1	-1.07092	0.0389004	-2.21183	0.00210274	-1.59539	0.0344354	2.41558	1.04856e-11	2.00827	2.13629e-06	1.11199	0.00148323	04626(Plant-pathogen interaction);04144(Endocytosis);04144(Endocytosis)	GO:0043531(ADP binding);GO:0043531(ADP binding)
HORVU4Hr1G013180	probable E3 ubiquitin-protein ligase RHY1A isoform X1	-1.54948	0.00112735	-1.52485	0.0156171	-2.29656	0.000363646	-1.38994	0.000244897	-2.12467	0.000191956	-2.68079	6.52187e-05	NA	NA
HORVU3Hr1G081740	probable F-box protein At2g36090	-11.3152	1	-11.3152	1	-11.3152	1	-4.26396	4.21109e-05	-13.519	2.438e-11	-3.59217	0.000766832	NA	GO:0016020(membrane);GO:0016021(integral component of membrane)
HORVU6Hr1G019870	probable F-box protein At4g22030	1.46358	1	5.95496	4.06361e-11	6.75251	6.19165e-16	3.59991	1.90161e-07	5.49711	5.97538e-10	7.66896	9.17029e-29	NA	NA
HORVU7Hr1G121500	probable flavin-containing monooxygenase 1	1.75098	1	2.53763	0.00561179	0.626507	1	4.29945	5.77664e-13	4.6777	2.73115e-12	3.84161	1.95536e-07	NA	GO:0004497(monooxygenase activity);GO:0004499(N,N-dimethylaniline monooxygenase activity);GO:0016491(oxidoreductase activity);GO:0050660(flavin adenine dinucleotide binding);GO:0050661(NADP binding);GO:0055114(oxidation-reduction process);GO:0055114(oxidation-reduction process)
HORVU3Hr1G033490	probable folate-biopterin transporter 4 isoform X1	0.26863	0.860687	0.606542	0.335703	1.59457	0.000234043	1.30428	0.000863913	1.99297	5.48009e-06	2.05008	1.20986e-09	NA	GO:0016020(membrane);GO:0016021(integral component of membrane);GO:0016021(integral component of membrane)
HORVU5Hr1G012290	probable glucan 1,3-beta-glucosidase A	0	1	0	1	0	1	13.373	1.09713e-15	13.3446	1.67799e-12	15.7109	1.31197e-11	00500(Starch and sucrose metabolism);00500(Starch and sucrose metabolism)	GO:0004553(hydrolase activity, hydrolyzing O-glycosyl compounds);GO:0005975(carbohydrate metabolic process);GO:0007015(actin filament organization);GO:0008152(metabolic process);GO:0016787(hydrolase activity);GO:0016798(hydrolase activity, acting on glycosyl bonds);GO:0051015(actin filament binding);GO:0051015(actin filament binding)
HORVU5Hr1G012450	probable glucan 1,3-beta-glucosidase A	0	1	0	1	0	1	12.4459	4.10214e-12	13.3849	8.22804e-13	14.7835	2.30551e-16	00500(Starch and sucrose metabolism);00500(Starch and sucrose metabolism)	GO:0004553(hydrolase activity, hydrolyzing O-glycosyl compounds);GO:0005975(carbohydrate metabolic process);GO:0007015(actin filament organization);GO:0008152(metabolic process);GO:0016787(hydrolase activity);GO:0016798(hydrolase activity, acting on glycosyl bonds);GO:0051015(actin filament binding);GO:0051015(actin filament binding)
HORVU1Hr1G049280	probable glutathione S-transferase GSTU6	1.61667	0.00331107	3.53356	9.57119e-10	2.60582	3.91221e-07	2.12778	1.70011e-13	4.13445	1.42546e-11	5.20383	3.56089e-36	00480(Glutathione metabolism)	GO:0005515(protein binding)
HORVU1Hr1G001560	probable glutathione S-transferase GSTU6	1.10959	0.0580208	4.50083	2.01934e-20	5.08425	8.34657e-23	3.42327	1.6355e-08	8.09068	9.90801e-35	10.1153	7.54976e-57	00480(Glutathione metabolism);00480(Glutathione metabolism)	GO:0005515(protein binding);GO:0005515(protein binding)
HORVU4Hr1G086470	probable LRR receptor-like serine/threonine-protein kinase At3g47570	13.6563	3.89556e-20	13.0575	2.6628e-13	10.8323	1	6.03647	1.1091e-08	8.84816	5.32931e-16	5.84827	0.000681299	04075(Plant hormone signal transduction);04075(Plant hormone signal transduction)	GO:0000166(nucleotide binding);GO:0004672(protein kinase activity);GO:0004674(protein serine/threonine kinase activity);GO:0005515(protein binding);GO:0005524(ATP binding);GO:0006468(protein phosphorylation);GO:0016020(membrane);GO:0016021(integral component of membrane);GO:0016021(integral component of membrane)
HORVU1Hr1G006020	probable LRR receptor-like serine/threonine-protein kinase At5g45780 isoform X1 [Durio zibethinus]	-0.149631	0.0552371	-0.693873	0.0127781	-1.6868	3.72971e-07	2.54497	0.00114837	5.61937	5.65474e-12	5.62482	1.35197e-10	04016(MAPK signaling pathway - plant);04075(Plant hormone signal transduction);04626(Plant-pathogen interaction);04626(Plant-pathogen interaction)	GO:0000166(nucleotide binding);GO:0004672(protein kinase activity);GO:0004674(protein serine/threonine kinase activity);GO:0005515(protein binding);GO:0005524(ATP binding);GO:0006468(protein phosphorylation);GO:0016020(membrane);GO:0016021(integral component of membrane);GO:0016021(integral component of membrane)
HORVU4Hr1G076420	probable NAD(P)H dehydrogenase (quinone) FQR1-like 1	2.49491	0.0101492	6.51506	6.80582e-10	8.04344	5.47095e-20	1.9693	0.000194645	4.11409	5.33047e-10	6.57948	2.8987e-47	00130(Ubiquinone and other terpenoid-quinone biosynthesis);00130(Ubiquinone and other terpenoid-quinone biosynthesis)	GO:0003955(NAD(P)H dehydrogenase (quinone) activity);GO:0010181(FMN binding);GO:0016491(oxidoreductase activity);GO:0055114(oxidation-reduction process);GO:0055114(oxidation-reduction process)
HORVU2Hr1G121060	probable polyamine oxidase 4	0.763944	0.163672	1.12192	0.0100239	1.93324	2.25624e-07	1.47856	8.142e-06	2.36417	4.2613e-10	2.85457	4.1765e-18	00330(Arginine and proline metabolism);00410(beta-Alanine metabolism);00410(beta-Alanine metabolism)	GO:0005777(peroxisome);GO:0016491(oxidoreductase activity);GO:0046208(spermine catabolic process);GO:0050660(flavin adenine dinucleotide binding);GO:0052894(norspermine:oxygen oxidoreductase activity);GO:0052901(spermine:oxygen oxidoreductase (spermidine-forming) activity);GO:0055114(oxidation-reduction process);GO:1903602(thermospermine catabolic process);GO:1903602(thermospermine catabolic proc…
HORVU2Hr1G104630	probable protein phosphatase 2C 43 isoform X1	-8.53121	1	-1.98535	1	-8.53121	1	-11.8306	1.78555e-11	-11.8306	6.91689e-10	-11.8306	1.47746e-08	NA	GO:0003824(catalytic activity);GO:0004721(phosphoprotein phosphatase activity);GO:0004722(protein serine/threonine phosphatase activity);GO:0006470(protein dephosphorylation);GO:0016787(hydrolase activity);GO:0043169(cation binding);GO:0046872(metal ion binding);GO:0046872(metal ion binding)
HORVU5Hr1G018930	probable protein phosphatase 2C 78	0.541112	0.528033	1.59152	0.00180615	1.96077	1.18761e-06	1.40346	0.000619276	2.29814	7.58196e-07	2.34768	1.2825e-08	NA	GO:0003824(catalytic activity);GO:0004721(phosphoprotein phosphatase activity);GO:0004722(protein serine/threonine phosphatase activity);GO:0006470(protein dephosphorylation);GO:0016787(hydrolase activity);GO:0043169(cation binding);GO:0046872(metal ion binding);GO:0046872(metal ion binding)
HORVU3Hr1G062690	probable purine permease 4	0.74615	1	-1.01303	1	-2.67708	1	-3.82391	1.03563e-05	-12.5108	1.38539e-10	-12.5108	4.21892e-09	NA	GO:0005215(transporter activity);GO:0016020(membrane);GO:0016021(integral component of membrane);GO:0016021(integral component of membrane)
HORVU4Hr1G087720	probable receptor-like protein kinase At5g24010	0.618755	0.196378	1.07153	0.00470014	1.12314	0.000241361	1.16236	0.000423981	1.58829	5.75784e-06	1.68037	5.1139e-08	03060(Protein export);03060(Protein export)	GO:0003924(GTPase activity);GO:0004672(protein kinase activity);GO:0005047(signal recognition particle binding);GO:0005524(ATP binding);GO:0005525(GTP binding);GO:0005622(intracellular);GO:0005623(cell);GO:0005785(signal recognition particle receptor complex);GO:0006468(protein phosphorylation);GO:0006614(SRP-dependent cotranslational protein targeting to membrane);GO:0006886(intracellular protei…
HORVU4Hr1G065470	probable receptor-like serine/threonine-protein kinase At4g34500	-0.564964	0.0362703	-2.24742	0.000134537	-2.54823	9.88864e-06	-1.24003	5.47008e-05	-3.46119	1.57639e-08	-3.90961	0.000231058	NA	GO:0000166(nucleotide binding);GO:0004672(protein kinase activity);GO:0004674(protein serine/threonine kinase activity);GO:0005524(ATP binding);GO:0006468(protein phosphorylation);GO:0016020(membrane);GO:0016021(integral component of membrane);GO:0016021(integral component of membrane)
HORVU6Hr1G084500	probable serine incorporator	0.00510173	0.184761	0.288104	0.601795	0.748177	0.0085365	1.06285	0.0023231	1.18346	0.00141862	1.43285	1.46625e-06	00860(Porphyrin and chlorophyll metabolism);00860(Porphyrin and chlorophyll metabolism)	GO:0016020(membrane);GO:0016021(integral component of membrane);GO:0016021(integral component of membrane)
HORVU7Hr1G078530	probable serine/threonine-protein kinase At5g41260	0.883323	0.0445216	1.85856	8.55583e-07	2.02969	2.52785e-09	1.6906	5.56086e-08	3.41379	7.81636e-22	3.43759	5.71385e-23	04075(Plant hormone signal transduction);04075(Plant hormone signal transduction)	GO:0004672(protein kinase activity);GO:0005515(protein binding);GO:0005524(ATP binding);GO:0006468(protein phosphorylation);GO:0006468(protein phosphorylation)
HORVU7Hr1G109590	probable serine/threonine-protein kinase PBL17	0.0666279	0.366905	0.331518	0.628979	1.66752	2.44617e-06	1.6821	6.18617e-06	2.1767	1.90461e-08	2.81846	1.48364e-12	NA	GO:0000166(nucleotide binding);GO:0004672(protein kinase activity);GO:0004674(protein serine/threonine kinase activity);GO:0005524(ATP binding);GO:0006468(protein phosphorylation);GO:0006468(protein phosphorylation)
HORVU2Hr1G095950	probable serine/threonine-protein kinase PIX13 isoform X2	-0.5276	0.232833	2.14157	0.0197065	3.82818	3.54738e-08	2.21962	0.000782642	2.98562	0.000842596	2.87844	3.11589e-05	NA	GO:0004672(protein kinase activity);GO:0005524(ATP binding);GO:0006468(protein phosphorylation);GO:0006468(protein phosphorylation)
HORVU1Hr1G026570	probable strigolactone esterase DAD2	-0.612764	0.0684759	-2.31015	0.00259624	-0.996378	0.139795	-2.68573	1.04925e-11	-3.35003	1.61118e-09	-3.13198	0.000433526	NA	NA
HORVU3Hr1G093830	probable sucrose-phosphate synthase 1	-10.4045	1	-10.4045	1	-4.8296	1	-2.76897	0.00010495	-7.02043	4.13962e-11	-13.5483	1.10995e-16	00500(Starch and sucrose metabolism);00500(Starch and sucrose metabolism)	GO:0005794(Golgi apparatus);GO:0005985(sucrose metabolic process);GO:0016157(sucrose synthase activity);GO:0016740(transferase activity);GO:0016757(transferase activity, transferring glycosyl groups);GO:0046524(sucrose-phosphate synthase activity);GO:0046524(sucrose-phosphate synthase activity)
HORVU3Hr1G068140	probable sulfate transporter 3.5 isoform X3	-0.840892	0.0604885	0.976436	0.231097	1.89022	0.00115776	5.84529	2.48678e-20	4.88151	1.38893e-17	4.7214	9.44128e-17	NA	GO:0008271(secondary active sulfate transmembrane transporter activity);GO:0008272(sulfate transport);GO:0015116(sulfate transmembrane transporter activity);GO:0016020(membrane);GO:0016021(integral component of membrane);GO:0055085(transmembrane transport);GO:1902358(sulfate transmembrane transport);GO:1902358(sulfate transmembrane transport)
HORVU6Hr1G079650	probable tyrosine-protein phosphatase At1g05000	15.3487	3.04018e-19	12.7616	1	10.3296	1	15.2658	4.94958e-21	14.3327	2.95458e-11	13.5486	1.026e-10	NA	GO:0004725(protein tyrosine phosphatase activity);GO:0005634(nucleus);GO:0005737(cytoplasm);GO:0016311(dephosphorylation);GO:0016791(phosphatase activity);GO:0035335(peptidyl-tyrosine dephosphorylation);GO:1900150(regulation of defense response to fungus);GO:1900150(regulation of defense response to fungus)
HORVU1Hr1G090110	probable WRKY transcription factor 53	0.923066	1	4.47117	1.12852e-05	4.78201	4.44937e-07	3.25082	1.1202e-05	4.33538	7.36921e-08	5.1777	7.50659e-09	04626(Plant-pathogen interaction)	GO:0003677(DNA binding);GO:0003700(DNA-binding transcription factor activity);GO:0005634(nucleus);GO:0006355(regulation of transcription, DNA-templated);GO:0043565(sequence-specific DNA binding)
HORVU1Hr1G090130	probable WRKY transcription factor 53	0.0872472	1	4.20252	8.30143e-06	4.13117	1.20397e-06	3.31585	9.69639e-06	4.45529	1.47969e-08	4.82571	9.66367e-08	04626(Plant-pathogen interaction);04626(Plant-pathogen interaction)	GO:0003677(DNA binding);GO:0003700(DNA-binding transcription factor activity);GO:0005634(nucleus);GO:0006355(regulation of transcription, DNA-templated);GO:0043565(sequence-specific DNA binding);GO:0043565(sequence-specific DNA binding)
HORVU1Hr1G069620	probable WRKY transcription factor 70	1.35637	0.0900637	5.75126	3.92632e-13	5.81982	2.02488e-21	2.11661	0.000317886	3.93548	6.63363e-08	3.13324	3.3232e-06	04016(MAPK signaling pathway - plant);04626(Plant-pathogen interaction);04626(Plant-pathogen interaction)	GO:0003677(DNA binding);GO:0003700(DNA-binding transcription factor activity);GO:0005634(nucleus);GO:0006355(regulation of transcription, DNA-templated);GO:0043565(sequence-specific DNA binding);GO:0043565(sequence-specific DNA binding)
HORVU5Hr1G048700	prolamine box binding factor	-2.10437	1	-0.824203	0.303518	-12.4644	1	-3.95819	2.68309e-06	-3.7924	9.03703e-05	-4.52497	4.83198e-07	NA	GO:0003677(DNA binding);GO:0005634(nucleus);GO:0006355(regulation of transcription, DNA-templated)
HORVU4Hr1G034650	protein ABERRANT POLLEN TRANSMISSION 1-like isoform X1	-1.66765	1.40319e-11	-1.83947	3.92559e-08	-0.94873	0.00570716	-2.14828	1.21634e-19	-1.9562	3.83738e-09	-1.95365	1.07142e-06	NA	GO:0016020(membrane);GO:0016021(integral component of membrane);GO:0016021(integral component of membrane)
HORVU4Hr1G074230	protein CHROMATIN REMODELING 35-like	4.27643	1	6.40419	2.0234e-07	8.14311	2.31177e-17	2.37639	0.00251761	3.24703	5.41754e-05	3.74035	1.63908e-06	03440(Homologous recombination);03440(Homologous recombination)	GO:0005524(ATP binding);GO:0016020(membrane);GO:0016021(integral component of membrane);GO:0016021(integral component of membrane)
HORVU1Hr1G090990	protein CHUP1, chloroplastic	-1.67025	0.000161473	-1.68387	0.00427022	-1.66468	0.00942052	-1.52928	1.96841e-05	-1.70755	0.000777925	-2.74421	4.35825e-05	NA	GO:0005179(hormone activity);GO:0005576(extracellular region);GO:0005576(extracellular region)
HORVU1Hr1G059310	protein DEHYDRATION-INDUCED 19 homolog 2	-0.292228	0.00981728	-0.51348	0.0836087	-0.525501	0.17916	1.70404	2.24493e-08	1.69623	0.000148511	1.95022	1.43641e-05	NA	NA
HORVU1Hr1G084190	protein DETOXIFICATION 14-like	2.22818	9.1588e-11	1.86059	1.25702e-05	0.164525	0.658837	2.2582	4.06992e-11	2.49105	1.07088e-09	1.38679	0.000154192	NA	GO:0006855(drug transmembrane transport);GO:0015238(drug transmembrane transporter activity);GO:0015297(antiporter activity);GO:0016020(membrane);GO:0016021(integral component of membrane);GO:0042908(xenobiotic transport);GO:0042910(xenobiotic transmembrane transporter activity);GO:0055085(transmembrane transport);GO:0055085(transmembrane transport)
HORVU2Hr1G068090	protein DETOXIFICATION 16-like	1.02985	0.0325564	3.85972	1.68131e-16	3.10707	2.74476e-15	1.36856	0.00108154	4.24843	2.77352e-27	3.98493	1.64368e-25	NA	GO:0006855(drug transmembrane transport);GO:0015238(drug transmembrane transporter activity);GO:0015297(antiporter activity);GO:0016020(membrane);GO:0016021(integral component of membrane);GO:0042908(xenobiotic transport);GO:0042910(xenobiotic transmembrane transporter activity);GO:0055085(transmembrane transport);GO:0055085(transmembrane transport)
HORVU2Hr1G075810	protein disulfide isomerase-like 5-2	0.730757	0.0775835	1.2475	0.000606932	0.984862	0.000850366	1.16627	0.000107408	1.94152	1.42095e-08	1.34025	3.14855e-06	04141(Protein processing in endoplasmic reticulum);04141(Protein processing in endoplasmic reticulum)	GO:0005623(cell);GO:0016020(membrane);GO:0016021(integral component of membrane);GO:0045454(cell redox homeostasis);GO:0045454(cell redox homeostasis)
HORVU5Hr1G092310	protein DYAD-like	2.23918	1	3.96948	0.000313246	5.38381	1.19668e-07	2.33258	0.00110463	4.0875	8.28232e-08	5.14823	3.16681e-18	03008(Ribosome biogenesis in eukaryotes);03008(Ribosome biogenesis in eukaryotes)	NA
HORVU3Hr1G083470	protein EARLY RESPONSIVE TO DEHYDRATION 15-like	-0.212706	0.0362821	-0.153086	0.416919	-1.97893	3.72181e-07	-1.20673	8.25491e-08	-1.64648	0.000415571	-2.16358	3.00256e-07	NA	NA
HORVU3Hr1G034590	protein ECERIFERUM 1-like	-2.10554	1	-4.44714	1	-3.78958	1	-2.64232	0.000410557	-3.36923	0.00119225	-5.96136	2.0799e-06	NA	NA
HORVU6Hr1G077790	protein EXORDIUM-like	2.31066	6.44667e-09	0.941012	0.0347301	1.125	0.0136231	2.75713	2.13855e-13	1.96531	0.000479762	2.07753	2.58369e-07	NA	NA
HORVU5Hr1G014810	protein FAR1-RELATED SEQUENCE 5-like	-0.939672	0.0204428	-1.35232	0.0265659	-1.36925	0.0493479	-1.49351	7.64934e-07	-2.26208	1.99432e-06	-3.41629	1.14891e-08	04016(MAPK signaling pathway - plant);04075(Plant hormone signal transduction);04075(Plant hormone signal transduction)	GO:0006355(regulation of transcription, DNA-templated);GO:0006355(regulation of transcription, DNA-templated)
HORVU4Hr1G077050	protein FAR1-RELATED SEQUENCE 5-like isoform X1	1.12221	0.014478	2.09487	1.29315e-06	2.08152	2.54379e-09	1.31447	0.00139087	1.99365	2.26421e-06	1.62019	3.05163e-05	NA	GO:0006355(regulation of transcription, DNA-templated);GO:0008270(zinc ion binding);GO:0043565(sequence-specific DNA binding);GO:0043565(sequence-specific DNA binding)
HORVU1Hr1G038060	protein fluG	1.32175	1.11077e-05	1.02764	0.00585241	0.355009	0.188211	1.40578	1.00188e-05	1.99808	9.95912e-09	1.26587	2.11903e-05	00630(Glyoxylate and dicarboxylate metabolism);00910(Nitrogen metabolism);00250(Alanine, aspartate and glutamate metabolism);00220(Arginine biosynthesis);00220(Arginine biosynthesis)	GO:0003824(catalytic activity);GO:0004356(glutamate-ammonia ligase activity);GO:0006542(glutamine biosynthetic process);GO:0006807(nitrogen compound metabolic process);GO:0016787(hydrolase activity);GO:0016787(hydrolase activity)
HORVU6Hr1G088790	protein G1-like6	-2.86715	6.73311e-06	-3.48997	0.00726916	-4.27822	3.46116e-05	-2.01437	0.000555041	-5.39317	1.30761e-06	-3.62554	0.000786856	04016(MAPK signaling pathway - plant);04075(Plant hormone signal transduction);04626(Plant-pathogen interaction);04626(Plant-pathogen interaction)	NA
HORVU5Hr1G063950	protein GAMETE EXPRESSED 2	-10.5969	1	-10.5969	1	-6.546	1	-4.02174	1.82297e-05	-4.20636	5.63629e-05	-11.0429	1.54326e-07	NA	GO:0016020(membrane);GO:0016021(integral component of membrane);GO:0016021(integral component of membrane)
HORVU7Hr1G024060	Protein IQ-DOMAIN 1	1.09916	0.291946	1.21205	0.189534	2.67389	1.58168e-05	2.13853	8.26283e-05	2.38566	0.000327912	3.12735	2.53715e-10	NA	GO:0005515(protein binding)
HORVU4Hr1G082110	protein NLP1-like	0.586267	0.518794	1.02917	0.0544259	0.50264	0.22319	1.41327	0.000384784	1.71129	9.06502e-05	1.68686	3.39485e-06	NA	GO:0003677(DNA binding);GO:0005515(protein binding);GO:0005634(nucleus);GO:0006351(transcription, DNA-templated);GO:0006355(regulation of transcription, DNA-templated);GO:0006355(regulation of transcription, DNA-templated)
HORVU7Hr1G025670	protein NRT1/ PTR FAMILY 2.3-like	6.1358	3.52332e-08	5.7422	7.35757e-06	4.89623	1	5.47304	3.49308e-06	5.28277	3.4297e-05	5.48201	1.0958e-06	NA	GO:0016020(membrane);GO:0016021(integral component of membrane);GO:0022857(transmembrane transporter activity);GO:0055085(transmembrane transport);GO:0055085(transmembrane transport)
HORVU1Hr1G091870	protein REDUCED WALL ACETYLATION 3-like	0.695904	0.103788	0.725153	0.0683445	1.37169	1.44493e-05	1.2509	6.35003e-05	2.22497	4.8051e-10	2.45772	1.03152e-13	NA	GO:0016020(membrane);GO:0016021(integral component of membrane);GO:0016021(integral component of membrane)
HORVU6Hr1G057770	protein ROOT HAIR DEFECTIVE 3 homolog 2-like	-2.2852	2.12043e-16	-0.748677	0.0167931	-0.444858	0.233189	-1.74054	1.44977e-12	-1.3861	1.74152e-06	-2.22979	7.59597e-09	NA	GO:0000166(nucleotide binding);GO:0003924(GTPase activity);GO:0005525(GTP binding);GO:0005783(endoplasmic reticulum);GO:0005789(endoplasmic reticulum membrane);GO:0016020(membrane);GO:0016021(integral component of membrane);GO:0016787(hydrolase activity);GO:0016787(hydrolase activity)
HORVU6Hr1G057780	protein ROOT HAIR DEFECTIVE 3 homolog 2-like	-1.68699	0.00179595	-0.713317	0.238424	0.494647	0.421293	-1.63527	1.62736e-07	-1.37386	0.00111543	-1.92912	0.000899176	NA	GO:0000166(nucleotide binding);GO:0005525(GTP binding);GO:0005789(endoplasmic reticulum membrane);GO:0016020(membrane);GO:0016021(integral component of membrane);GO:0016787(hydrolase activity);GO:0016787(hydrolase activity)
[truncated: 219 more rows]

## Sheet: Table S5
				Table S5 Overlapped DEGs between overlapped DEGs of GP and ZU9 at different sampling dates.
[truncated: 1,801 more rows]
